# Supplementary material for: Acceptor-mediated regioselective enzyme catalyzed sialylation: chemoenzymatic synthesis of GAA-7 ganglioside glycan
Source: Royal Society of Chemistry journal article supplement (doi:10.1039/d1cc00653c), 2021-01-01
Supplement: d1cc00653c1.pdf [file d1cc00653c1.pdf]

## Supplementary information

### Acceptor-Mediated Regioselective Enzyme Catalyzed Sialylation:

### Chemoenzymatic Synthesis of GAA-7 Ganglioside Glycan

Hsin-Kai Tseng,<sup>a</sup> Yung-Yu Su,<sup>a</sup> Ting-Wei Chang,<sup>a</sup> Hsin-Chien Liu,<sup>a</sup> Pei-Jhen Li,<sup>a</sup> Pei-

Yun Chiang,<sup>a</sup> Chun-Cheng Lin,<sup>\*ab</sup>

<sup>a</sup> *Department of Chemistry, National Tsing Hua University, 101 Section 2, Kuang Fu Road, Hsinchu 30013, Taiwan. E-mail: cclin66@mx.nthu.edu.tw*

<sup>b</sup> *Department of Medicinal and Applied Chemistry, Kaohsiung Medical University, 100, Shih-Chuan 1st Road, Kaohsiung 80708, Taiwan.*

## Table of Contents

|                                                                                                                                                                         |     |
|-------------------------------------------------------------------------------------------------------------------------------------------------------------------------|-----|
| <b>Materials and methods</b> .....                                                                                                                                      | S3  |
| <b>Cloning and Overexpression of Enzymes</b> .....                                                                                                                      | S4  |
| <b>Fig. S1</b> SDS-PAGE analysis of PmST3Δ35. ....                                                                                                                      | S5  |
| <b>Fig. S2</b> <sup>1</sup> H- <sup>13</sup> C HMBC analysis of compound <b>4</b> . ....                                                                                | S6  |
| <b>Fig. S3</b> <sup>1</sup> H NMR comparison of monosialylated compounds <b>4</b> , <b>5</b> , and <b>6</b> . ....                                                      | S7  |
| <b>Fig. S4</b> <sup>13</sup> C NMR comparison of monosialylated compounds <b>4</b> , <b>5</b> , and <b>6</b> . ....                                                     | S8  |
| <b>Fig. S5</b> Study of α(2,6) sialylation of compound <b>3</b> . ....                                                                                                  | S9  |
| <b>Fig. S6</b> Analysis of the sialylation of compound <b>3</b> by two kinds of α(2,6) STs with various equivalents of sialic acid (0.5, 0.75, 1.0, 3.0, and 5.0). .... | S10 |
| <b>Fig. S7</b> <sup>1</sup> H- <sup>13</sup> C HMBC spectrum of <b>5</b> . ....                                                                                         | S11 |
| <b>Fig. S8</b> <sup>1</sup> H- <sup>13</sup> C HMBC and <sup>1</sup> H- <sup>13</sup> C HSQC-TOCSY analysis of compound <b>6</b> . ....                                 | S12 |
| <b>Fig. S9</b> Full carbon atom assignment of inner Gal from the <sup>1</sup> H- <sup>13</sup> C HSQC-TOCSY spectrum of <b>6</b> . ....                                 | S13 |
| <b>Fig. S10</b> Study of α(2,6) sialylation of compound <b>4</b> . ....                                                                                                 | S14 |
| <b>Fig. S11</b> Analysis of the sialylation of compound <b>4</b> by Pd2,6ST with reduced equivalents of sialic acid (0.5, 0.8, 1.0)....                                 | S15 |
| <b>Fig. S12</b> <sup>1</sup> H- <sup>13</sup> C HMBC analysis of compound <b>8</b> . ....                                                                               | S16 |
| <b>Fig. S13</b> Crucial carbon atom assignments of Gal and GalNAc on <b>8</b> by <sup>1</sup> H- <sup>13</sup> C HSQC-TOCSY. ....                                       | S17 |
| <b>Fig. S14</b> α(2,3) sialylation on GalNH <sub>2</sub> as evidenced by <sup>1</sup> H NMR spectroscopy. ....                                                          | S18 |
| <b>Fig. S15</b> <sup>1</sup> H- <sup>13</sup> C HMBC analysis of compound <b>1</b> . ....                                                                               | S19 |
| <b>Fig. S16</b> Crucial carbon atom assignments of Gal and GalNAc in <b>1</b> by <sup>1</sup> H- <sup>13</sup> C HSQC-TOCSY. ....                                       | S20 |
| <b>Fig. S17</b> <sup>1</sup> H- <sup>13</sup> C HSQC and <sup>1</sup> H- <sup>13</sup> C HMBC analysis of compound <b>1a</b> . ....                                     | S21 |
| <b>General Procedure</b> .....                                                                                                                                          | S22 |
| <b>Synthetic procedures and characterization of new compounds</b> .....                                                                                                 | S25 |
| <b>Reference</b> .....                                                                                                                                                  | S37 |
| <b>NMR spectra</b> .....                                                                                                                                                | S38 |

## Materials and methods

All solvents were dried and distilled by standard techniques. *N,N*-Dimethylformamide (DMF) was vacuum-distilled over sodium hydride. Pyridine was distilled over sodium hydride. Tetrahydrofuran (THF) was distilled from sodium under nitrogen (N<sub>2</sub>). Dichloromethane (DCM), toluene, and acetonitrile (ACN) were distilled from calcium hydride under N<sub>2</sub>. The chemicals for the synthesis were all obtained from Acros, Merck, Fluka, or Sigma-Aldrich and used without further purification unless otherwise noted.

All reactions were carried out in oven-dried glassware (104 °C) and performed under anhydrous conditions with N<sub>2</sub> unless indicated otherwise. The reactions were monitored by analytical thin-layer chromatography (TLC) on Merck silica gel 60 F<sub>254</sub> plates (0.25 mm). Detection was accomplished by examination under UV light (254 nm) and by staining with *p*-anisaldehyde, ninhydrin, cerium molybdate, or potassium permanganate staining solution. Silica gel column chromatography was performed using a forced flow of the indicated solvent on silica gel 60 (Merck). Size exclusion column chromatography was performed by gravity on polymethacrylic polymer beads (Toyopearl HW-40F) with MeOH and polyacrylamide gel (Bio-Gel P-2) with deionized H<sub>2</sub>O. C18 reverse-phase silica column (Sep-Pak Vac tC18 cartridge 20 cc/5 g 37-55 μm, Waters) and C18 reverse-phase silica gel (LiChroprep® RP-18 (40-63 μm), Merck) were used to perform reverse-phase column chromatography with methanol, acetonitrile, and deionized H<sub>2</sub>O. DEAE Sepharose® Fast Flow (GE Healthcare Life Sciences) was used for anion exchange chromatography. <sup>1</sup>H and <sup>13</sup>C NMR spectra were recorded by Bruker AV-400, AV-600, Varian MR400, Varian-Unity INOVA-500, or VNMRS-700. Chemical shifts are expressed in ppm using residual CDCl<sub>3</sub> (7.24 ppm), CD<sub>3</sub>OD (3.31 or 4.87 ppm), or D<sub>2</sub>O (4.79 ppm at 298 K) as internal standard in <sup>1</sup>H-NMR spectra. <sup>13</sup>C-NMR spectra were recorded in either CDCl<sub>3</sub>, CD<sub>3</sub>OD or D<sub>2</sub>O at 100, 125, 150, or 175 MHz, using the central resonances of CDCl<sub>3</sub> (77.0 ppm) and CD<sub>3</sub>OD (49.0 ppm) as the internal references. 2D NMR (COSY, HSQC, HMBC, or HSQC-TOCSY) experiments were used to assist assignment of the products. Multiplicities are reported by using the following abbreviations: s = singlet, d = doublet, t = triplet, q = quartet, m = multiplet, br = broad; *J* = coupling constant values are expressed in Hertz. Mass spectra were obtained in ESI mode.

Alkaline phosphatase from calf intestinal was purchased from Sigma-Aldrich. Chemical competent *E. coli* BL21(DE3) were purchased from Yeastern Biotechnology (Taipei, Taiwan). Vector plasmid pET-22b(+) was purchased from Merck (Darmstadt, Germany). *Nde*I restriction enzyme and *Xho*I restriction enzyme were purchased from New England Biolabs (Ipswich, MA, USA). QIAprep spin miniprep kit and QIAEX II gel extraction kit were purchased from Qiagen (Valencia, CA, USA). T4 DNA ligase and 1 kb DNA ladder were obtained from Thermo (Waltham, MA, USA). DNA primers for the polymerase chain reaction (PCR) were purchased from Mission Biotech (Taipei, Taiwan). Matrixes of bacterial cultural media were purchased from BD Bioscience (San Jose, CA, USA). IMPACT™ system (Intein Mediated Purification with Affinity Chitin binding Tag) was purchased from New England Biolabs. His-tag purification resin was purchased from Roche (Basel, Switzerland). Amylose resin was purchased from Cyrusbioscience (New Taipei City, Taiwan). Protein molecular weight standards and the *Pfu* DNA polymerase were purchased from Thermo Fisher Scientific (Waltham, MA, USA). The protein

concentrations were determined with the Bradford Protein Assay (Bio-Rad) and Pierce™ BCA protein assay kit (Thermo Fisher Scientific) using bovine serum albumin as the standard. Protein purification devices were using centrifugal filter devices (Vivaspin® Turbo 15 10 kDa MWCO, Satorius).

## Cloning and Overexpression of Enzymes

**Enzyme Resources.** BNahK (*N*-acetylhexosamine 1-kinase from *Bifidobacterium longum* subsp. *longum*),<sup>1</sup> EcGlmU (*N*-acetylglucosamine 1-phosphate uridyltransferase from *Escherichia coli*),<sup>2</sup> AGX1 (recombinant human UDP-GalNAc pyrophosphorylase),<sup>3</sup> NmLgtA (*N*-acetylglucosaminyltransferase from *Neisseria meningitidis*),<sup>4</sup> NmCSS (CMP-sialic acid synthetase from *Neisseria meningitidis*),<sup>5</sup> PmST1 ( $\alpha$ (2,3)-sialyltransferase 1 from *Pasteurella multocida*),<sup>6</sup> CjCstI ( $\alpha$ (2,3)-sialyltransferase from *Campylobacter jejuni*),<sup>7</sup> Pd2,6ST ( $\alpha$ (2,6)-sialyltransferase from *Photobacterium damsela*),<sup>1</sup> and Psp2,6ST ( $\alpha$ (2,6)-sialyltransferase from *Photobacterium sp. JH-ISH-224*)<sup>8</sup> were cloned and overexpressed as previously reported procedures. The plasmid pMal-c2X containing the *lgtA* gene and pET-15b containing the *agx1* gene were generously provided by Professor Ching-Ching Yu.

**Gene cloning.** The genes for the PmST3 $\Delta$ 35 was optimized as previous described<sup>9</sup> and synthesized by Genomics (New Taipei City, Taiwan), then isolated by PCR amplification using the following primers: PmST3 $\Delta$ 35-F: 5'- GAG ACAT ATG GAT AAA TTT GCC GAA CAT G-3' (*NdeI* restriction site is underlined) and PmST3 $\Delta$ 35-R: 5'- ATA TCT CGA GGC CCA GTT TTT CAT ACA CAA A-3' (*XhoI* restriction site is underlined). Briefly, PCR amplification of target gene was performed in a solution (50  $\mu$ L) that contained 50 ng of template DNA, 0.4  $\mu$ M of each primer, 0.2 mM dNTP, 1.5 mM MgCl<sub>2</sub>, and 2.5 U *Pfu* DNA polymerase. PCR was performed with denaturation at 95 °C for 30 sec, annealing at 61.5 °C for 30 sec and extension at 72 °C for 30 sec. The target gene was digested from the amplified fragment with *NdeI* and *XhoI* and then was inserted into the *NdeI/XhoI*-treated vector pET-22b(+). The ligation mixture was then transformed into the *E. coli* DH5 $\alpha$  and BL21 (DE3) strains of *E. coli* DNA sequencing was used to confirm the in-frame cloning of the truncation of 105 base pair residues from the 3' end of the target gene.

**Protein Overexpression and purification for PmST3.** The protein overexpression procedure is similarly as previous report.<sup>1</sup> Positive plasmid was selected and subsequently transformed into *E. coli* BL21(DE3) chemical competent cells. The *E. coli* BL21 (DE3) harboring the recombinant plasmid was grown in LB rich medium containing ampicillin (100  $\mu$ g/mL) at 37 °C until the OD<sub>600</sub> reached 0.5-0.8. Protein expression was then induced by adding 0.5 mM of IPTG (isopropyl-1-thio- $\beta$ -D-galactopyranoside) followed by incubation at 16 °C for 16-20 h with vigorous shaking at 200 rpm in a shaking incubator (Firstek S300R). The bacterial cells were harvested by centrifugation at 4 °C and 5000 x g for 15 min. The cell pellet was resuspended at 25 mL per liter of cell culture in column buffer (pH 8.0, 20 mM Tris-HCl containing 0.1% Triton X-100, 250 mM NaCl, and 0.1 mM EDTA). The cells were disrupted by sonication on ice for 30 min in 3-s intervals, and then the debris was removed by centrifugation for 60

min at 20000 x g and 4 °C. The supernatant was applied to 10 mL cOmplete™ HisTag Purification Resin bead column and then incubated for 30 mins. The resin was quickly washed with 20 column volumes of the same column buffer containing 10 mM imidazole. The bound protein was eluted out by 250 mM imidazole in column buffer. The fractions were analyzed by SDS-PAGE. Fractions with significant amounts of protein were pooled and concentrated using a centrifugal filter device, divided into aliquots, and stored at -20 °C.

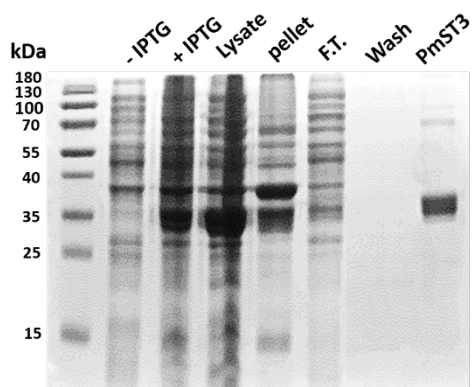

**Fig. S1** SDS-PAGE analysis of PmST3Δ35. The gel of the purified protein shows an apparent band that is close to the calculated molecular weight (33 kDa) of the desired protein. Lanes: IPTG (-/+), whole cell extract before and after induction; Lysate, supernatant of the induced cell extract after centrifugation; pellet, cell debris after centrifugation; F.T., flow through of the cell lysate after His-tag purification by resin bead column chromatography; Wash, His-tag purification resin bead column washed with column buffer containing 10 mM imidazole after flow through of the cell lysate; and PmST3, column-purified protein PmST3Δ35.

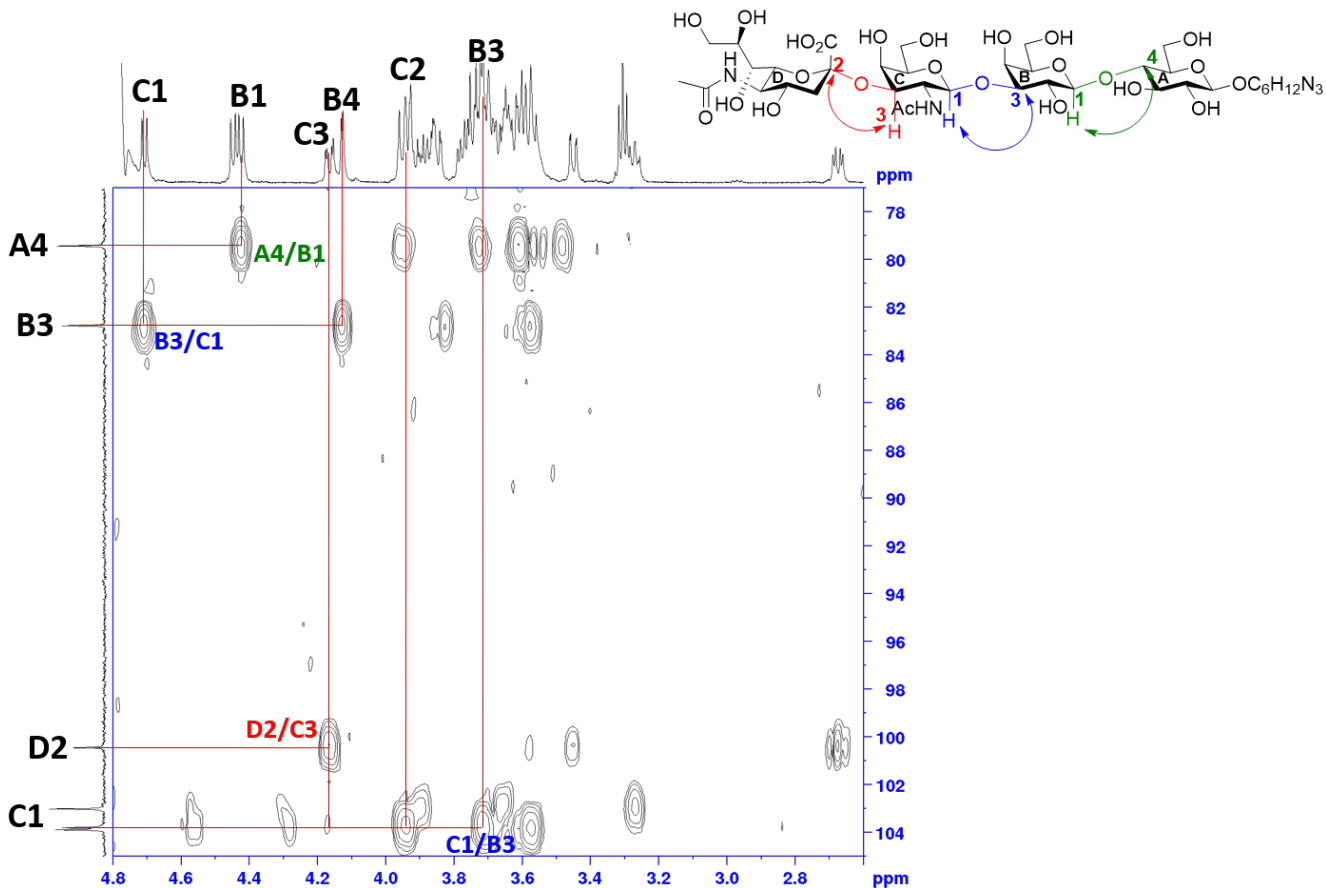

**Fig. S2** <sup>1</sup>H-<sup>13</sup>C HMBC analysis of compound 4. Glycans A, B, C, and D represent Glc, Gal, GalNAc, and Neu5Ac, respectively. The number indicates the position of the carbon or proton atom. **GalNAc-β(1,3)-Gal linkage.** A cross signal for the anomeric proton of GalNAc (C1) and the 3-position carbon atom of Gal (B3) was observed (B3/C1). Moreover, a cross signal for the 3-position proton of Gal (B3) and the anomeric carbon atom of GalNAc (C1) was observed (C1/B3). The cross signal correlations reveal that the glycosidic linkage is a 1→3 linkage. **Neu5Ac-α(2,3)-GalNAc linkage.** A cross signal for the anomeric carbon of sialic acid (D2) and the 3-position proton atoms of GalNAc (C3) was observed (D2/C3). The cross signal correlation suggests that the glycosidic linkage is a 2→3 linkage.

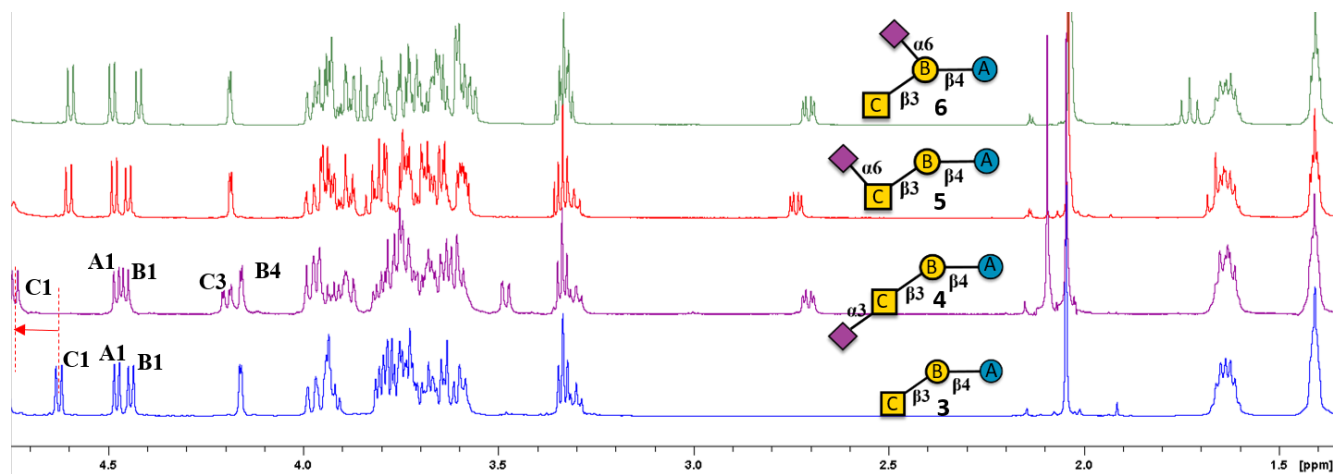

**Fig. S3**  $^1\text{H}$  NMR comparison of monosialylated compounds **4**, **5**, and **6**. Glycans A, B, C, and D represent Glc, Gal, GalNAc, and Neu5Ac, respectively. The number indicates the position of the proton atom. The H-1 signal of GalNAc (C1) was shifted downfield from 4.63 to 4.71 ppm after  $\alpha(2,3)$  sialylation (**4**), while no significant signal shift was observed for the  $\alpha(2,6)$  sialylated glycans **5** and **6**. Moreover, the H-3 signal of GalNAc (C3) was shifted downfield to 4.17 ppm in compound **4**. For  $\alpha(2,6)$  sialylation on Gal (**6**), the H-1 signal of Gal (B1) was shifted upfield but no shift was observed for the  $\alpha(2,6)$  sialylation on GalNAc (**5**).

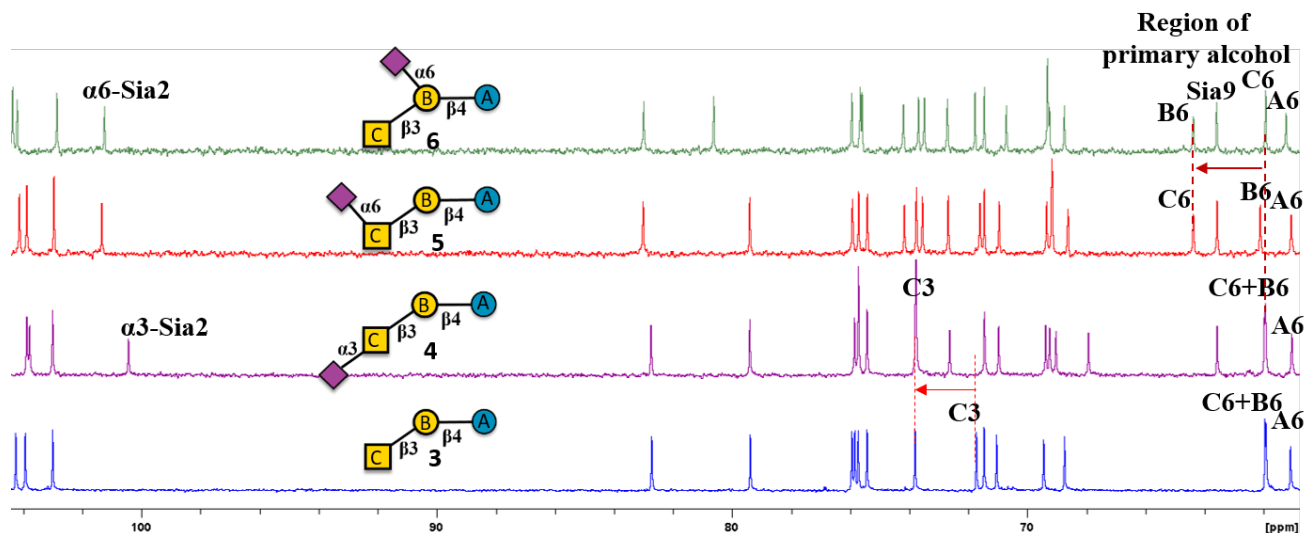

**Fig. S4**  $^{13}\text{C}$  NMR comparison of monosialylated compounds **4**, **5**, and **6**. Glycans A, B, and C represent Glc, Gal, and GalNAc, respectively. The number indicates the position of the carbon atom. Sia2 and Sia9 represent the anomeric and 9-position carbon atoms of sialic acid, respectively. The C-3 signal of GalNAc (C3) shifted downfield from 71.73 to 73.78 ppm after  $\alpha(2,3)$  sialylation (**4**), but no shift for the  $\alpha(2,6)$ -sialylated glycans **5** and **6** was observed. In contrast, in the primary alcohol region, there is no significant signal shift in **4** compared with **3** but there was an obvious chemical shift of the C-6 signal of GalNAc or Gal (C6 or B6) after  $\alpha(2,6)$  sialylation.



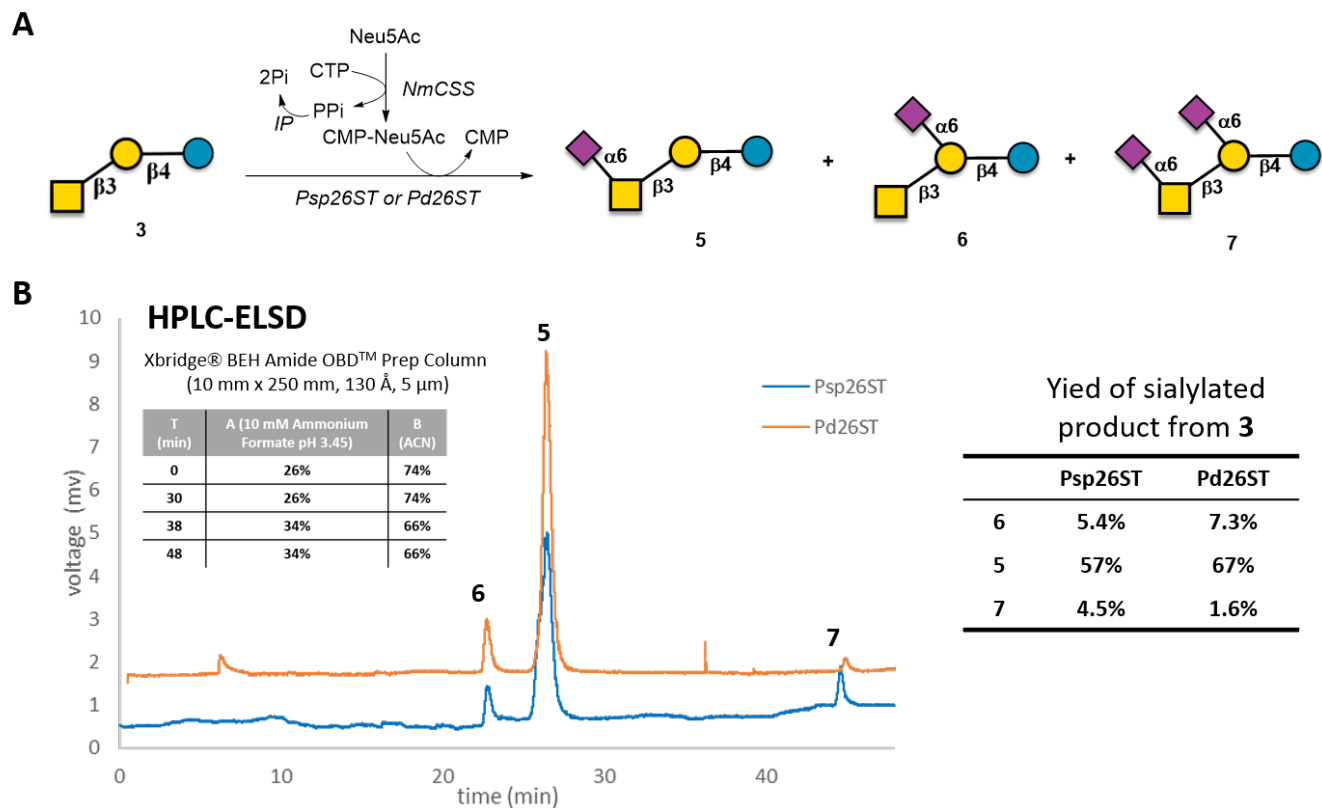

**Fig. S5** Study of  $\alpha(2,6)$  sialylation of compound **3**. HPLC-evaporative light scattering detector (ELSD) analysis of the sialylation of compound **3** by two kinds of  $\alpha(2,6)$  STs with 1.2 equivalents of sialic acid. A. Schematic of the enzymatic sialylation of compound **3** by Psp2,6ST and Pd2,6ST. B. HPLC-ELSD analysis of the crude sialylated products and their corresponding yields.

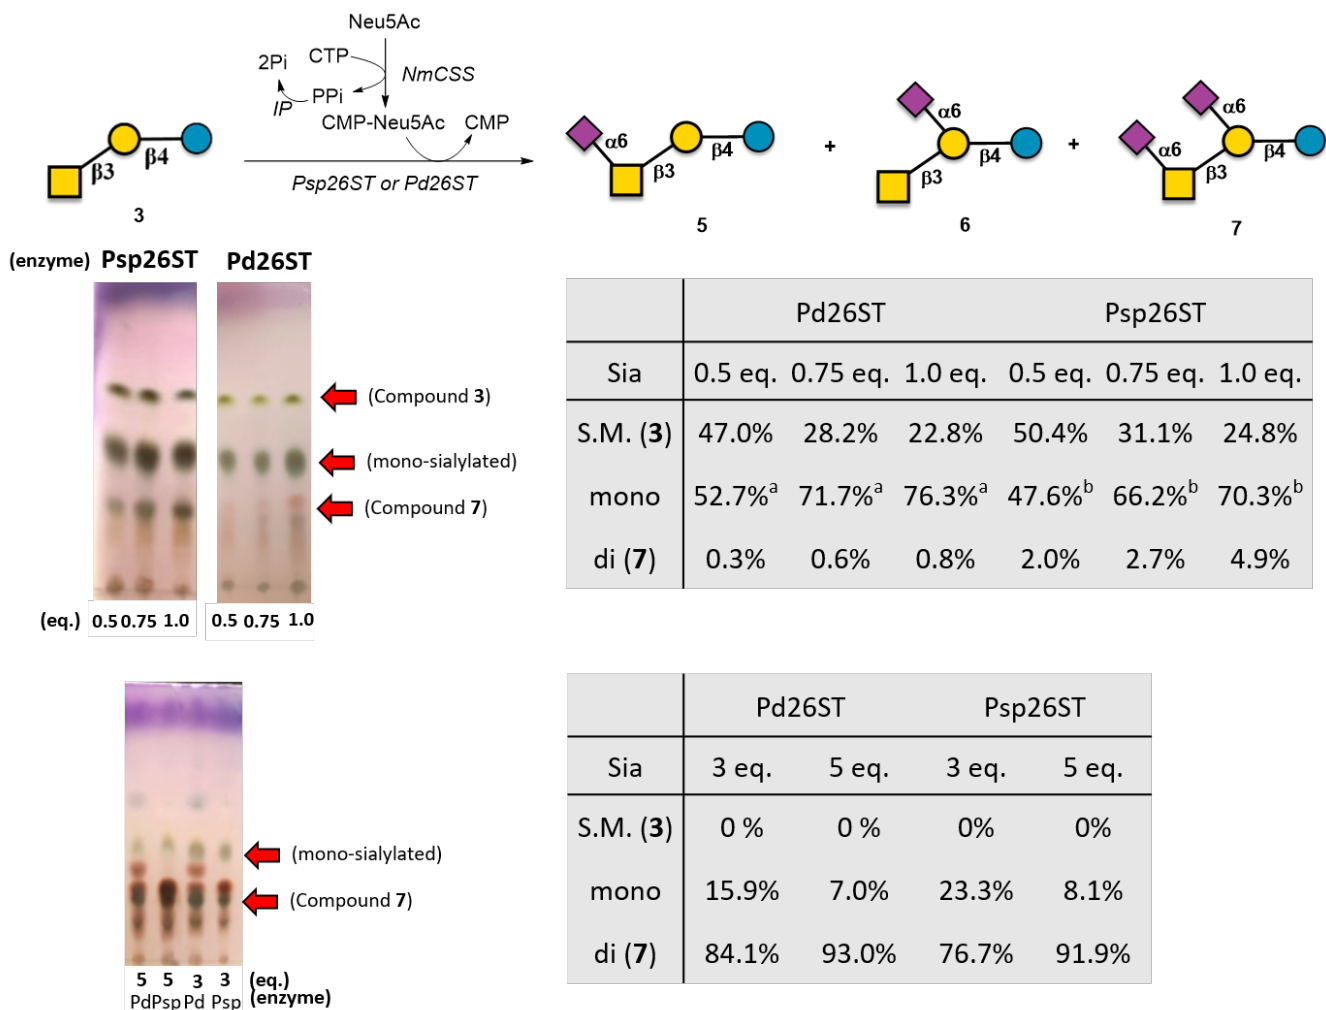

**Fig. S6** Analysis of the sialylation of compound **3** by two kinds of  $\alpha(2,6)$  STs with various equivalents of sialic acid (0.5, 0.75, 1.0, 3.0, and 5.0). The synthetic procedure was similar to the sialylation of compound **3** with 1.2 equivalents of sialic acid. The reaction was monitored by TLC (*n*-PrOH/H<sub>2</sub>O/AcOH = 6/2/1 (v/v/v)). After all of the CMP-sialic acid was consumed, the reaction was quenched by the addition of the same reaction volume of acetonitrile. The reaction solution was centrifuged (10,000 × g, 5 min) to remove enzymes and insoluble precipitates. The supernatant was filtered through a 0.45- $\mu$ m PVDF filter (Millipore) followed by injection of the residues into the HPLC-ELSD instrument. The glycan peaks were integrated, and the content of each glycan was calculated as shown in the tables. <sup>a</sup>Only compound **5** was observed. <sup>b</sup>Compounds **5** and **6** were observed (identified by HPLC-ELSD).

When using fewer equivalents of sialic acid, the  $\alpha(2,6)$  sialylation of compound **3** by Pd2,6ST preferred the nonreducing sugar (GalNAc). However, Psp2,6ST did not show regioselectivity between GalNAc and Gal. When 5 equivalents of sialic acid were used, the reactions catalyzed by both Pd2,6ST and Psp2,6ST generated a small amount of monosialylated product.

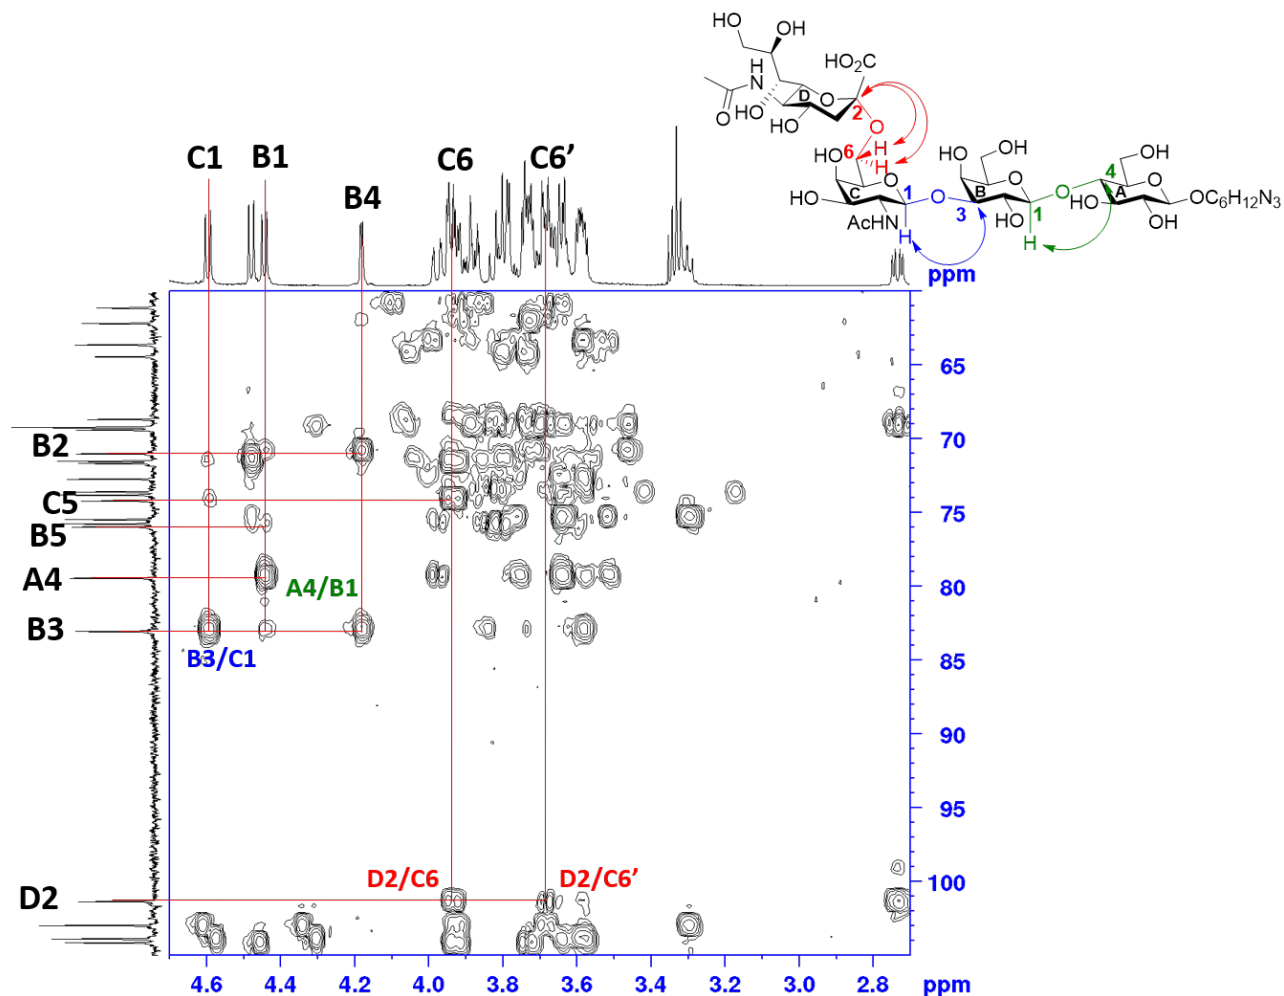

**Fig. S7**  $^1\text{H}$ - $^{13}\text{C}$  HMBC spectrum of **5**. Glycans A, B, C, and D represent Glc, Gal, GalNAc, and Neu5Ac, respectively. The number indicates the position of the carbon or proton atom. **Neu5Ac- $\alpha$ (2,6)-GalNAc linkage**. Cross signals for the anomeric carbon of sialic acid (D2) and both 6-position proton atoms of GalNAc (C6 and C6') were observed (D2/C6 and D2/C6'). Moreover, there were also cross signals for the C5 carbon and one of C6 protons of GalNAc (C5/C6) and the C5 carbon and the anomeric proton of GalNAc (C5/C1), supporting the assignment of the D2-C6-Hs cross signals. These signals reveal that the glycosidic linkage is a 2 $\rightarrow$ 6 linkage between Neu5Ac and GalNAc.

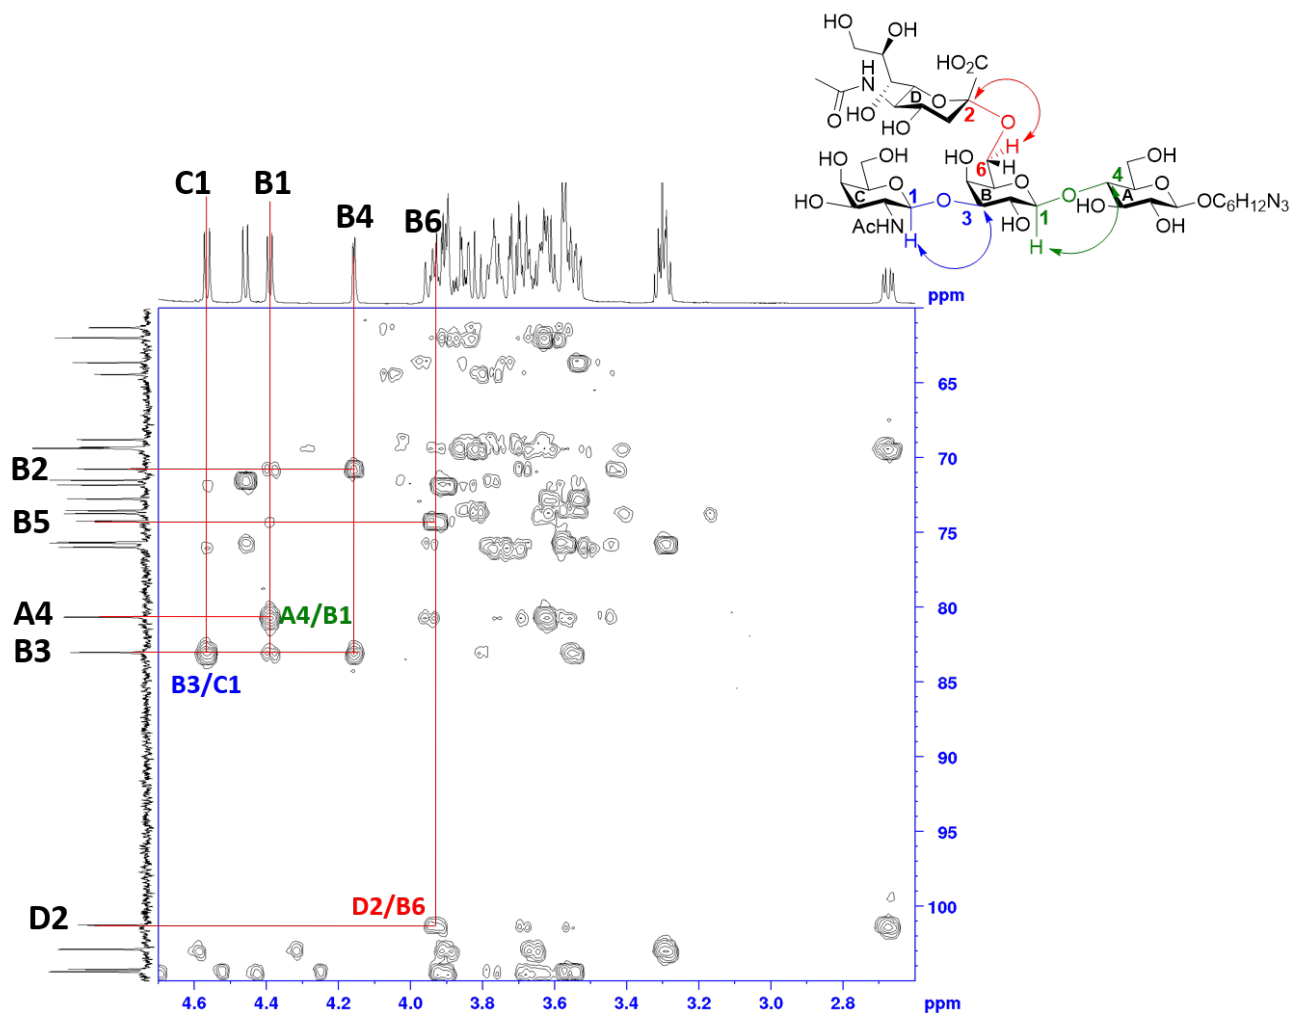

**Fig. S8**  $^1\text{H}$ - $^{13}\text{C}$  HMBC and  $^1\text{H}$ - $^{13}\text{C}$  HSQC-TOCSY analysis of compound **6**. Glycans A, B, C, and D represent Glc, Gal, GalNAc, and Neu5Ac, respectively. The number indicates the position of the carbon or proton atom. **Neu5Ac- $\alpha$ (2,6)-Gal linkage**. A cross signal for the anomeric carbon of sialic acid (D2) and one of the B6 protons of Gal (B6) was observed (D2/B6). This suggests that the glycosidic linkage is a 2 $\rightarrow$ 6 (Gal) linkage. There are also cross signals for the B5 carbon and one of the B6 protons of Gal (B5/B6) and the B5 carbon and the anomeric proton atom of Gal (B5/B1). These signals reveal that glycosidic linkage is a 2 $\rightarrow$ 6 linkage between Neu5Ac and Gal.

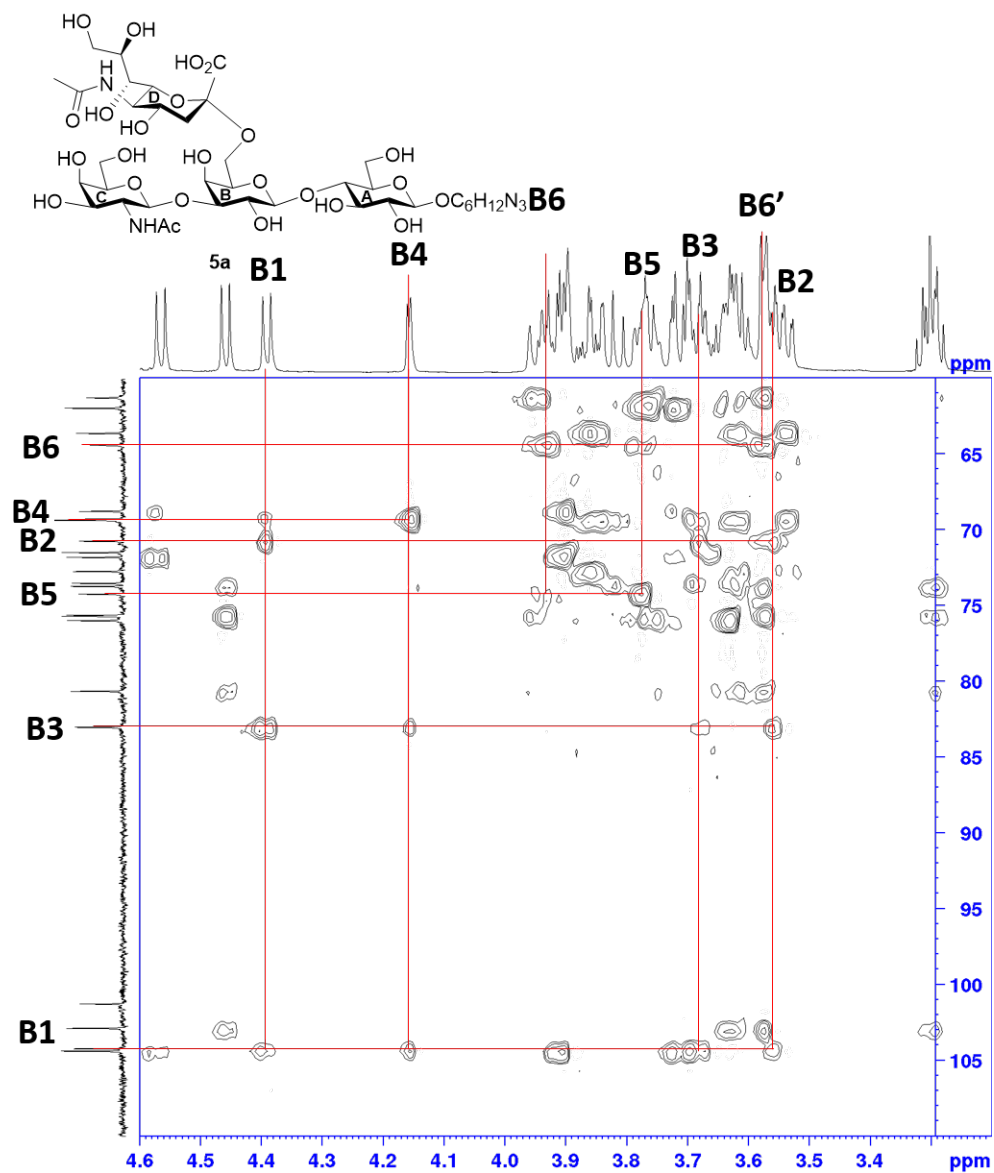

**Fig. S9** Full carbon atom assignment of inner Gal from the  $^1\text{H}$ - $^{13}\text{C}$  HSQC-TOCSY spectrum of **6**. The spectrum shows that the downfield shift signal of the 6-position carbon is on the Gal carbon rather than GalNAc carbon.

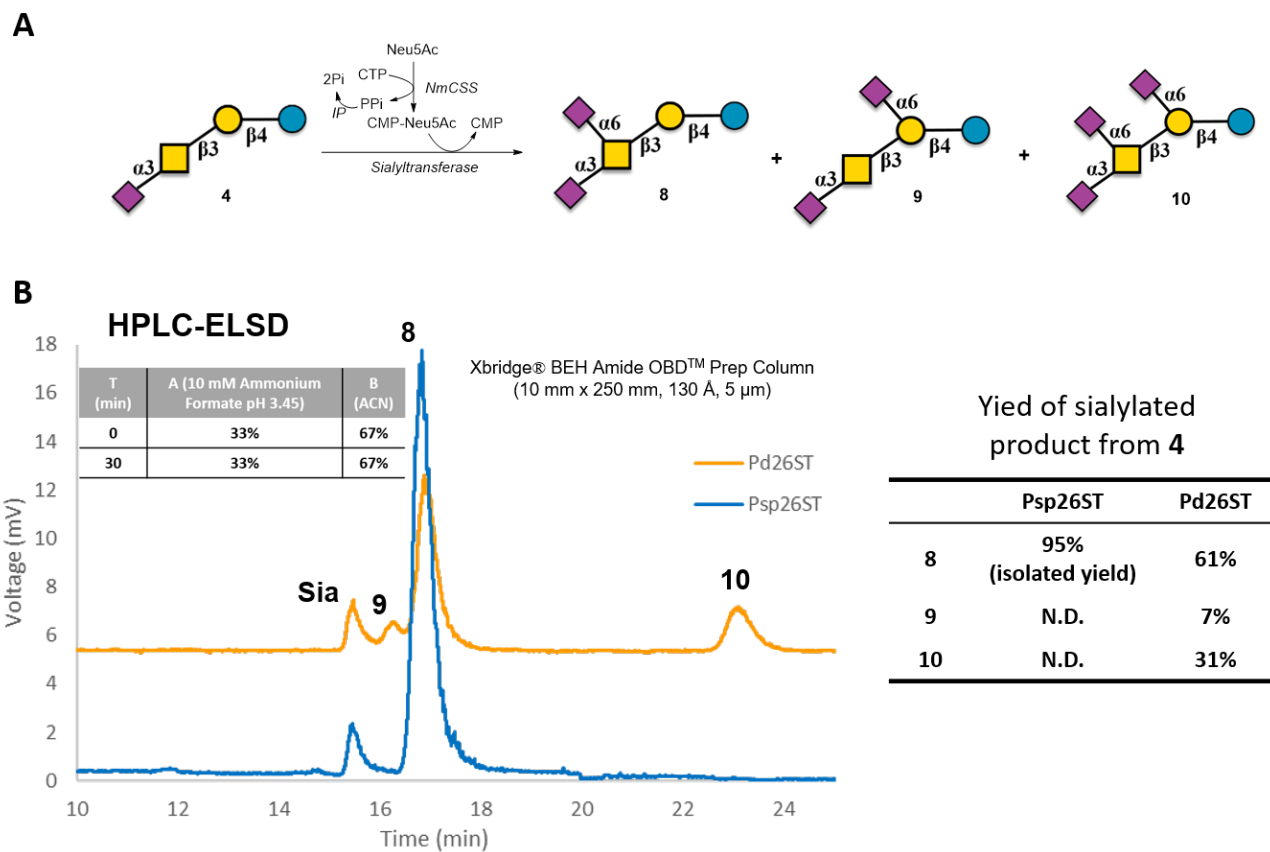

**Fig. S10** Study of  $\alpha(2,6)$  sialylation of compound **4**. HPLC-ELSD analysis of the sialylation of compound **4** by two different  $\alpha(2,6)$  STs with 1.5 equivalents of sialic acid. A. Schematic of the enzymatic sialylation of compound **4** by Psp2,6ST and Pd2,6ST. B. HPLC-ELSD analysis of the crude sialylated products and corresponding yields.

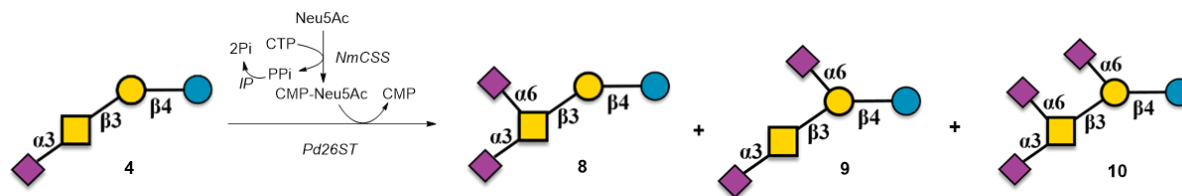

| Sia      | Pd26ST  |         |         |
|----------|---------|---------|---------|
|          | 0.5 eq. | 0.8 eq. | 1.0 eq. |
| S.M. (4) | 41.6%   | 21.1%   | 7.0%    |
| 8        | 47.5%   | 61.2%   | 68.9%   |
| 9        | 10.1%   | 10.5%   | 15.5%   |
| 10       | 0.7%    | 7.2%    | 8.6%    |

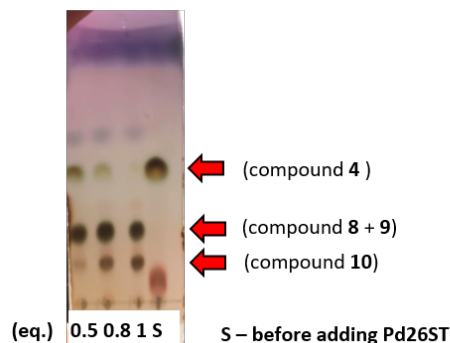

**Fig. S11** Analysis of the sialylation of compound **4** by Pd<sub>2,6</sub>ST with reduced equivalents of sialic acid (0.5, 0.8, 1.0). The reaction was monitored by TLC (*n*-PrOH/H<sub>2</sub>O/AcOH = 6/2/1 (v/v/v)). After the CMP-sialic acid was consumed, the reaction was quenched by the addition of the same reaction volume of acetonitrile. The reaction solution was centrifuged (10,000 × *g*, 5 min) to remove enzymes and insoluble precipitates. The supernatant was filtered through a 0.45- $\mu$ m PVDF filter (Millipore) followed by injection the residues into an HPLC-ELSD instrument. The glycan peaks were integrated, and the content of each glycan was calculated as shown in the table.

When using less than one equivalent of sialic acid, the  $\alpha(2,6)$  sialylation of compound **4** by Pd<sub>2,6</sub>ST produced regioisomers **8** and **9** (identified by HPLC-ELSD). This result suggests that Pd<sub>2,6</sub>ST does not have selectivity between GalNAc and Gal when compound **4** was used as the acceptor for sialylation.

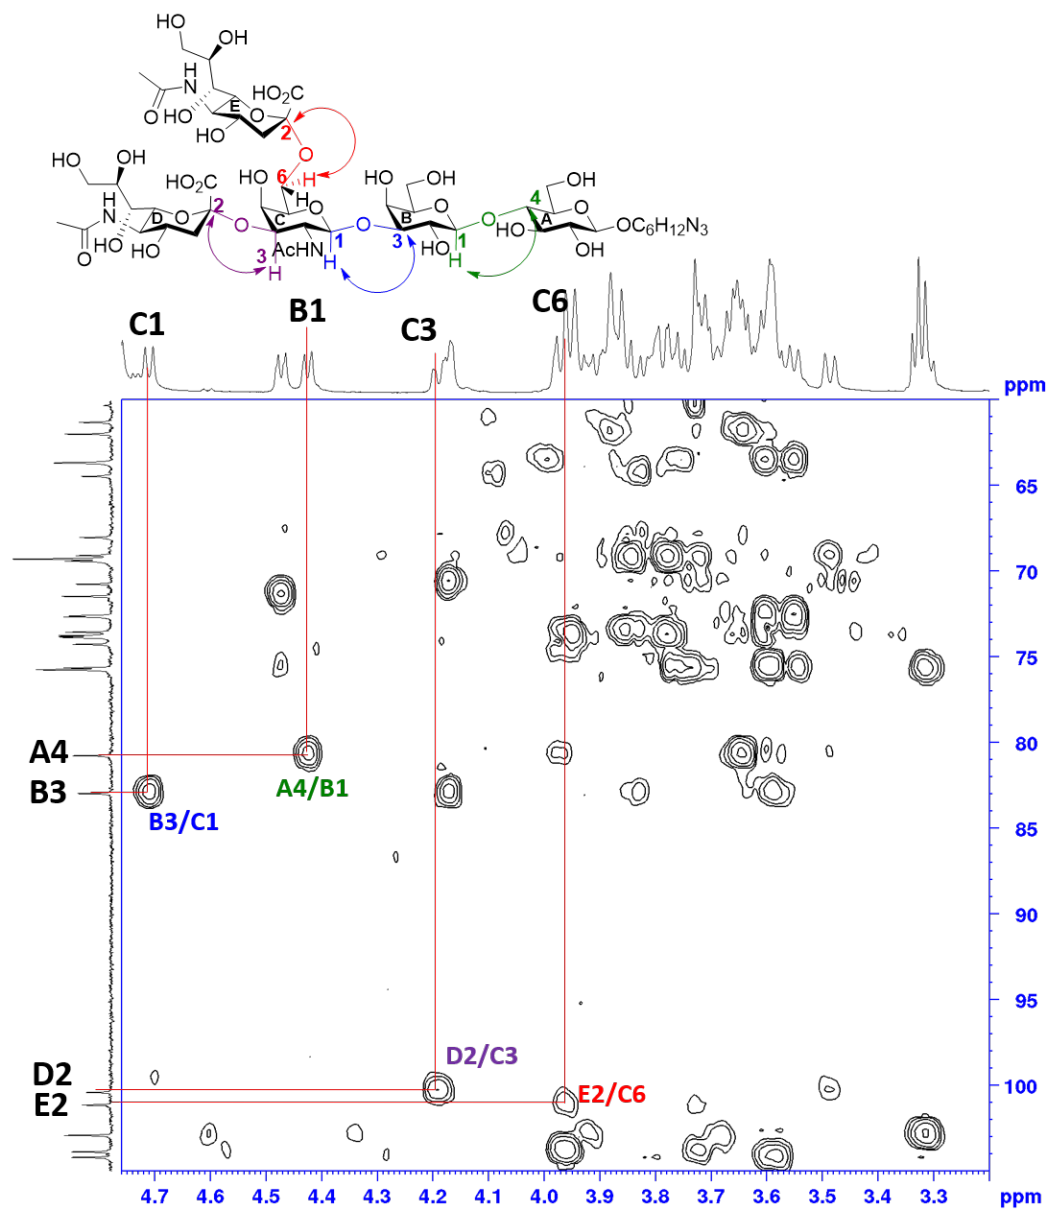

**Fig. S12**  $^1\text{H}$ - $^{13}\text{C}$  HMBC analysis of compound **8**. Glycans A, B, C, D, and E represent Glc, Gal, GalNAc,  $\alpha$ 3Neu5Ac, and  $\alpha$ 6Neu5Ac, respectively. The number indicates the position of the carbon or proton atom. **Neu5Ac- $\alpha$ (2,6)-GalNAc linkage.** A cross signal for the anomeric carbon of  $\alpha$ 6Neu5Ac (D2) and the one of the C6 protons of GalNAc (C6) was observed (D2/C6). This suggests that the glycosidic linkage is a 2  $\rightarrow$ 6 (GalNAc) linkage.



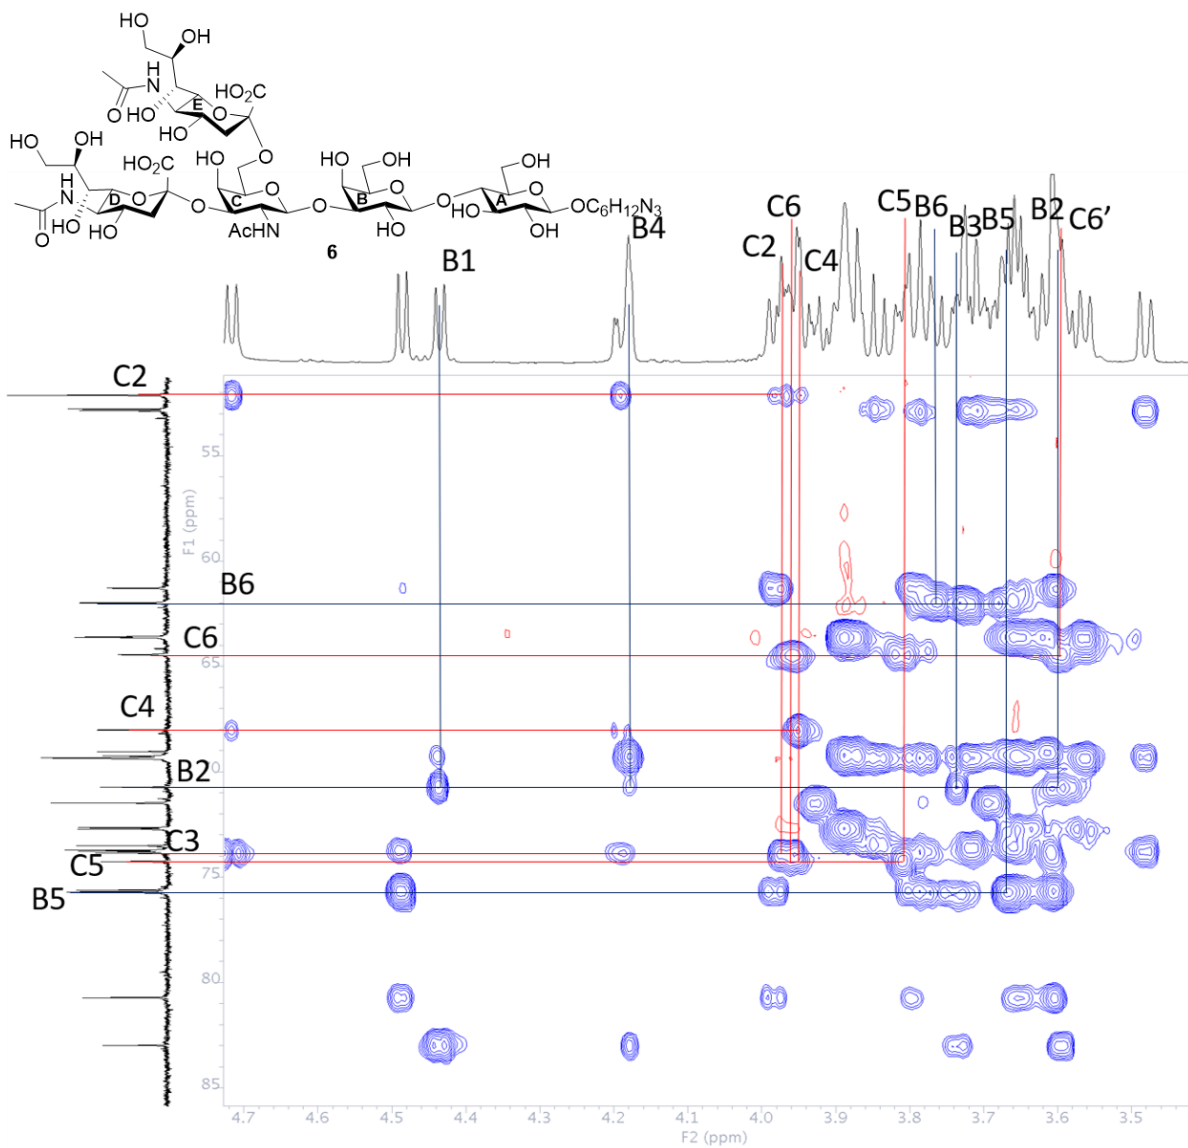

**Fig. S13** Crucial carbon atom assignments of Gal and GalNAc on **8** by  $^1\text{H}$ - $^{13}\text{C}$  HSQC-TOCSY. The results reveal that the downfield shifted signal of the 6-position carbon is on GalNAc rather than on Gal.

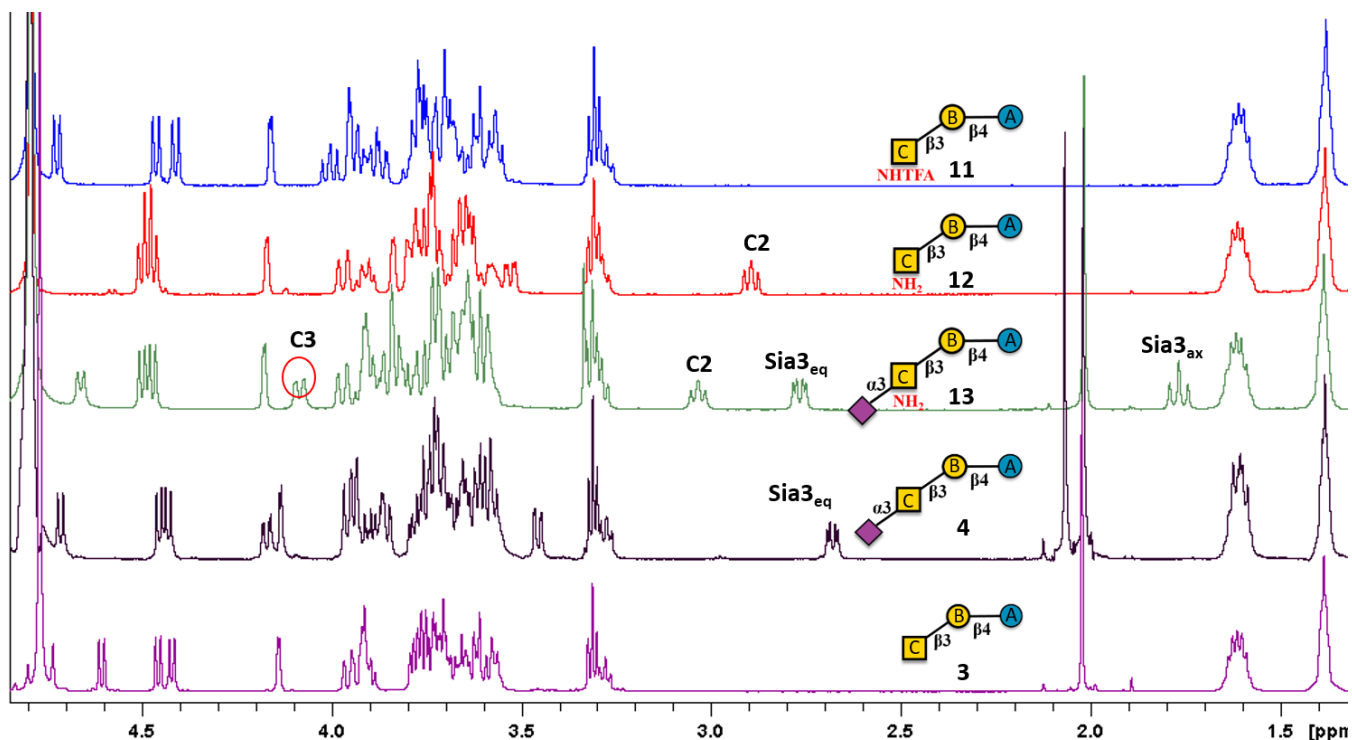

**Fig. S14**  $\alpha(2,3)$  sialylation on GalNH<sub>2</sub> as evidenced by <sup>1</sup>H NMR spectroscopy. Glycans A, B, and C represent Glc, Gal, and GalNAc, respectively. The number indicates the position of the carbon or proton atom. The C3-H on Neu5Ac is represented as Sia3<sub>eq</sub> (equatorial) and Sia3<sub>ax</sub> (axial). After deprotection of NHTFA, the C2-H signal of GalNH<sub>2</sub> (C2) shifted upfield to 2.89 ppm (**12**). In the green color spectrum (**13**), the C2 and Sia3<sub>eq</sub> signals confirmed that the sialylation of GalNH<sub>2</sub> was successful. In addition, the C3-H signal of GalNH<sub>2</sub> (C3) was shifted downfield, as shown by the red circle. After *N*-acetylation of **13**, the <sup>1</sup>H NMR spectrum of the purified product was identical to that of **4**.

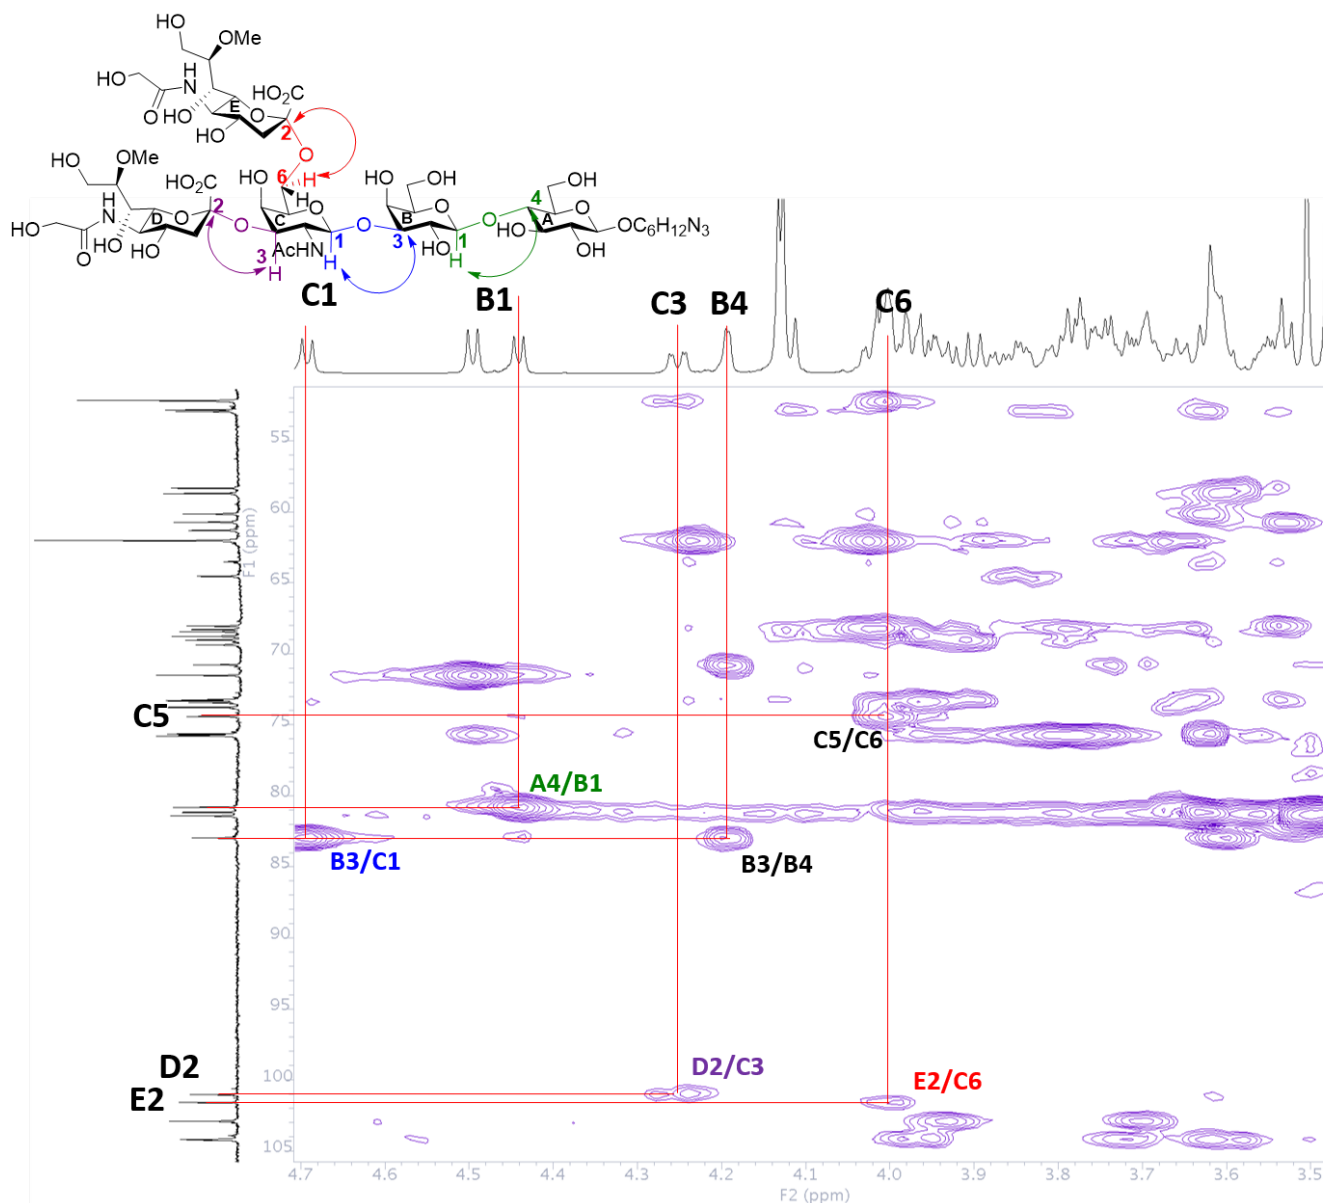

**Fig. S15**  $^1\text{H}$ - $^{13}\text{C}$  HMBC analysis of compound **1**. Glycans A, B, C, D, and E represent Glc, Gal, GalNAc,  $\alpha 3\text{Neu}5\text{Gc}8\text{Me}$ , and  $\alpha 6\text{Neu}5\text{Gc}8\text{Me}$ , respectively. The number indicates the position of the carbon or proton atom. **Neu5Gc8Me- $\alpha$ (2,6)-GalNAc linkage**. A cross signal for the anomeric carbon of  $\alpha 6\text{Neu}5\text{Gc}8\text{Me}$  (E2) and one of the C6 protons of GalNAc (C6) was observed (E2/C6). This suggests that the glycosidic linkage is a 2 $\rightarrow$ 6 (GalNAc) linkage.

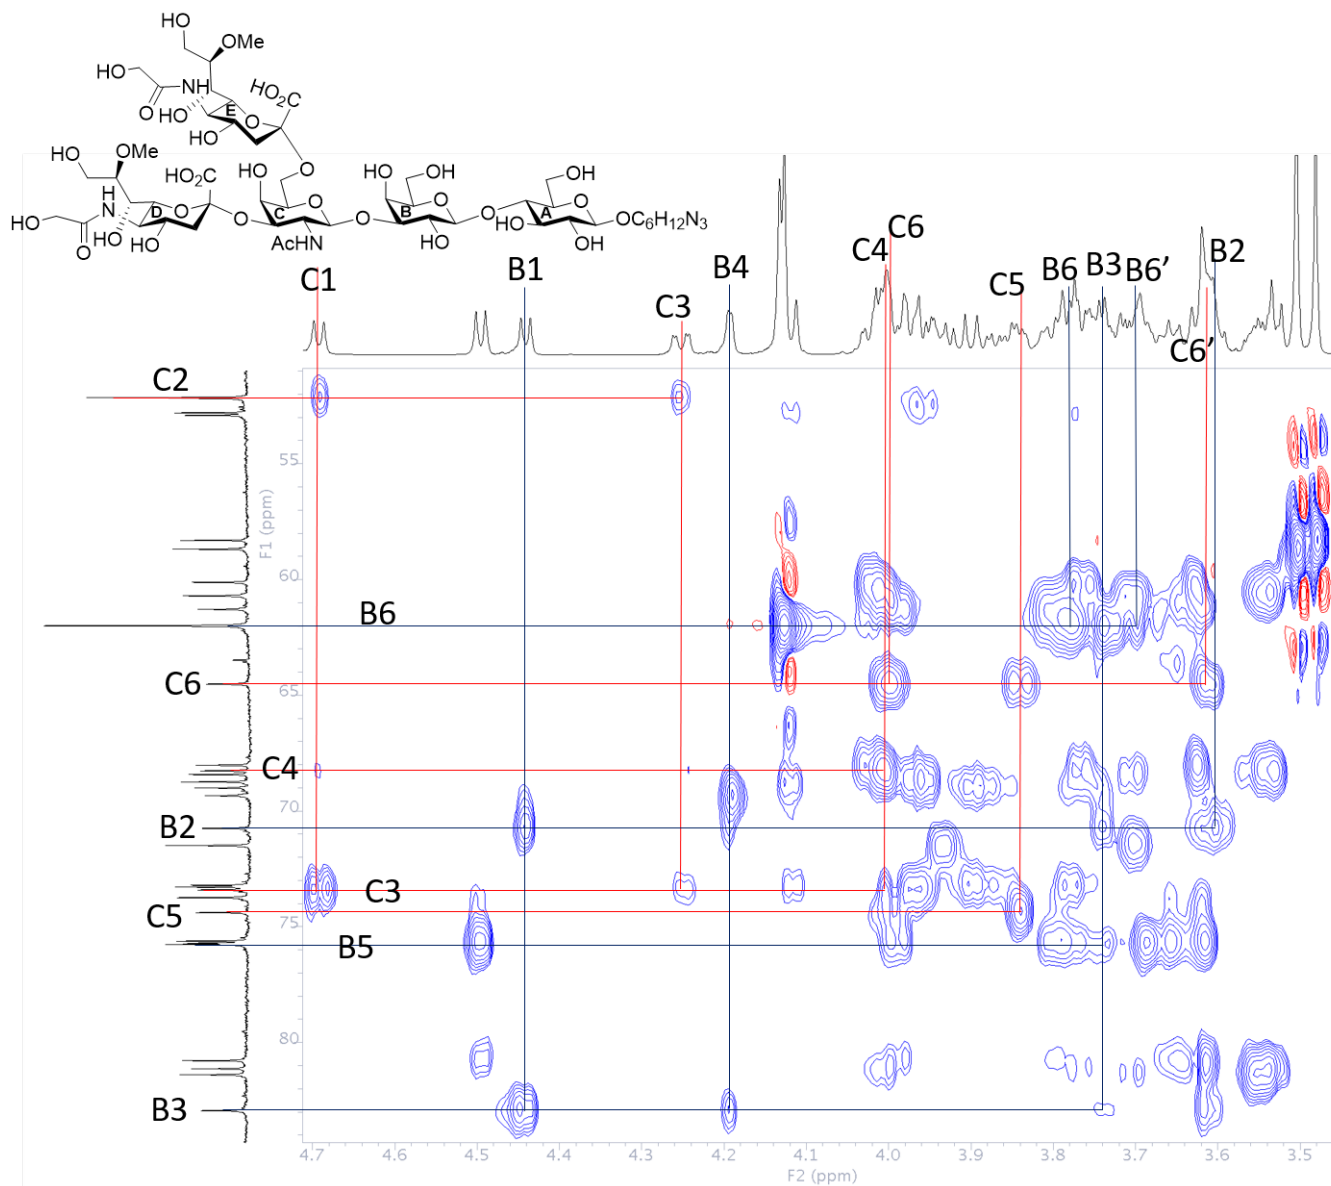

**Fig. S16** Crucial carbon atom assignments of Gal and GalNAc in **1** by  $^1\text{H}$ - $^{13}\text{C}$  HSQC-TOCSY. The results reveal that the downfield shifted signal of the 6-position carbon is on GalNAc rather than on Gal.

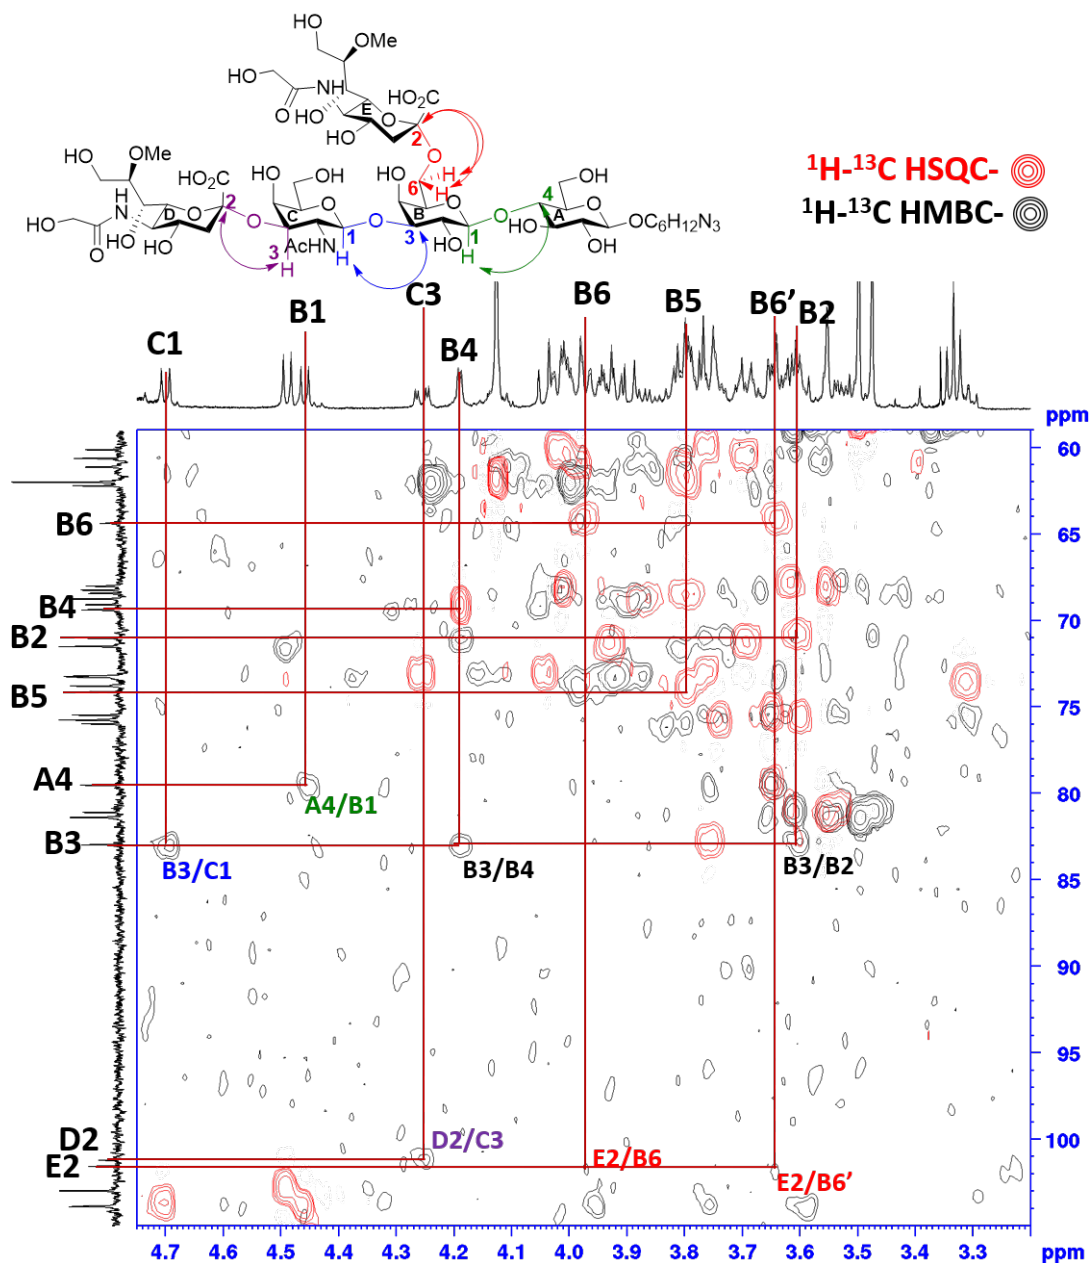

**Fig. S17**  $^1\text{H}$ - $^{13}\text{C}$  HSQC and  $^1\text{H}$ - $^{13}\text{C}$  HMBC analysis of compound **1a**. The red and black contours represent the cross signals on the HSQC and HMBC spectra, respectively. Glycans A, B, C, D, and E represent Glc, Gal, GalNAc,  $\alpha 3\text{Neu5Gc8Me}$ , and  $\alpha 6'\text{Neu5Gc8Me}$ , respectively. The number indicates the position of the carbon or proton atom. **Neu5Gc8Me- $\alpha$ (2,6)-Gal linkage.** Cross signals for the anomeric carbon of  $\alpha 6'\text{Neu5Gc8Me}$  (E2) and both of the 6-position proton atoms of Gal (B6 and B6') were observed (E2/B6 and E2/B6'). This result suggests that the glycosidic linkage is a 2 $\rightarrow$ 6 linkage between Neu5Gc8Me and Gal.

## General Procedure

### General Enzymatic Synthetic Procedure 1: Sequential One Pot Enzymatic $\alpha(2,3)$ - or $\alpha(2,6)$ -Sialylation

The pH of a buffer solution (100 mM Tris-HCl, pH 8.5) containing 15 mM of Neu5Ac or Neu5Gc8Me, 30 mM of CTP, and 20 mM of MgCl<sub>2</sub> was adjusted to 8.5 by adding 2N NaOH<sub>(aq.)</sub>. Then, 0.2-0.8 mg/mL of CSS and 0.1-0.3 mg/mL of IP were added to the above solution. The resulting mixture was incubated at 37 °C with agitation at 600 rpm for 0.5-2 h and the formation of CMP-Sia was monitored by TLC analysis (*n*-PrOH/ H<sub>2</sub>O/ AcOH = 6/2/1 (v/v/v), R<sub>f</sub> = 0.06). After the completion of the reaction as indicated by the disappearance of all of Neu5Ac or a half of Neu5Gc8Me on TLC, 5-10 mM of acceptor was added and the pH of the reaction solution was adjusted (pH 8.0 for Psp2,6ST and pH 8.5 for PmST1, PmST3, Cst-I, or Pd2,6ST). Finally, 0.4-0.9 mg/mL of Psp2,6ST, 2.2 mg/ml of PmST1, 1.1 mg/ml of PmST3, 0.9-1.1 mg/ml of Cst-I, or 0.2-0.6 mg/ml of Pd2,6ST was added and the solution was incubated at 25 °C for Psp2,6ST or 37 °C for other four sialyltransferases. Furthermore, 1.9 U/mL of alkaline phosphatase was added for Cst-I or PmST3 to decompose potentially inhibitory CMP. More enzymes were added if necessary. The reaction was monitored by TLC analysis (*n*-PrOH/ H<sub>2</sub>O/ AcOH = 6/2/1 (v/v/v)) and stained with *p*-anisaldehyde stain.

### General Enzymatic Synthetic Procedure 2: for Sequential One Pot Enzymatic Assembly of $\beta(1,3)$ -GalNAc or GalNTFA

The pH of a buffer solution (100 mM HEPES, pH 8.5) containing 20 mM of GalNAc or GalNTFA, 30 mM of ATP, 30 mM of UTP, and 20 mM of MgCl<sub>2</sub> was adjusted to 7.5 by adding 2N NaOH<sub>(aq.)</sub>. Then, 0.1-0.2 mg/mL of NahK, 1.4 mg/mL of GlmU (only for GalNAc) or 0.03-0.1 mg/mL of AGX1, and 0.1-0.3 mg/mL of IP were added to the above solution. The resulting mixture was incubated at 37 °C with agitation at 600 rpm for 7 h and the formation of UDP-GalNAc or UDP-GalNTFA was monitored by TLC analysis (*n*-PrOH/ H<sub>2</sub>O/ AcOH = 6/2/1 (v/v/v), R<sub>f</sub> = 0.15 or 0.43). After the completion of the reaction as indicated by the disappearance of GalNAc-1-P on TLC, 10 mM of acceptor was added and the pH of the reaction solution was adjusted to pH 7.8 by addition of 2N NaOH<sub>(aq.)</sub>. Then, 15 mM of MnCl<sub>2</sub> and 0.6-1.4 mg/mL of LgtA were added and the solution was incubated at 37 °C. More enzymes were added if necessary. The reaction was monitored by TLC analysis (*n*-PrOH/ H<sub>2</sub>O/ AcOH = 6/2/1 (v/v/v)) and stained with *p*-anisaldehyde stain.

### General Procedure for Deprotection of NHTFA (*N*-trifluoroacetyl) Group

The pH of a H<sub>2</sub>O solution containing NHTFA protected compound was adjusted to 12.0 by adding 2N NaOH<sub>(aq.)</sub>. The resulting mixture was incubated at 37 °C with agitation at 600 rpm for 1 h and the reaction was monitored by TLC analysis (*n*-PrOH/ H<sub>2</sub>O/ AcOH = 6/2/1 (v/v/v)). After the completion of the reaction as indicated by the disappearance of starting material on TLC. The reaction was then neutralized with 4 N HCl, concentrated and purified by a C18 reverse-phase silica column (Sep-Pak Vac C18 cartridge 5 g, 55-105  $\mu$ m, Waters) using a solution followed by a gradient of 0-80% MeOH in H<sub>2</sub>O as eluent.

### **General Procedure for *N*-Acetylation**

Thirty mM of amine (1.0 equiv.) containing compound was dissolved in H<sub>2</sub>O followed by adding solid NaHCO<sub>3</sub> (10.0 equiv.) and Ac<sub>2</sub>O (10.0 equiv.). After being sonicated for 2 min, the reaction mixture was incubated at 37 °C for 1 h. After the completion of the reaction as indicated by the disappearance of starting material on TLC. The resulting solution was purified by size-exclusion column using H<sub>2</sub>O as eluent (BioGel P2 gel packed in a column 1.6 cm x 50 cm, Biorad).

### **General Purification Procedure 1**

If there is no regioisomer after enzymatic sialylation, the reaction mixtures are suitable for this purification procedure. The enzymatic reaction was quenched by addition of the same reaction volume of EtOH. The reaction solution was centrifuged (10,000 x g, 10 min) to remove enzymes and insoluble precipitates. The supernatant was collected, filtered (0.45- $\mu$ m PVDF filter; Millipore), and then concentrated. The resulting residue was purified by a C18 reverse-phase silica column (Sep-Pak Vac C18 cartridge 5 g, 55-105  $\mu$ m, Waters) using a solution followed by a gradient of 0-100% MeOH in H<sub>2</sub>O as eluent. The fractions containing products were collected and directly loaded on to anion exchange chromatography (DEAE Sepharose Fast Flow resin, GE Healthcare). The column was washed with water (10 mL) followed by the elution with a gradient of aqueous sodium chloride (10-100 mM, increase 10 mM for each gradient and 10 mL for each gradient). The fractions containing products were further purified by size-exclusion column using H<sub>2</sub>O as eluent (BioGel P2 gel packed in a column 1.6 cm x 50 cm, Biorad).

### **General Purification Procedure 2**

If there are regioisomers after enzymatic sialylation, the reaction mixtures are suitable for this purification procedure. Follow the same procedure as described in general purification procedure 1, but the residues after C-18 reverse-phase silica column were pooled and purified by Xbridge® BEH Amide OBD™ Prep Column (10 x 250 mm, 130Å, 5 $\mu$ m) with a flow rate of 2 mL/min. HPLC purification was monitored by ELSD (evaporative light scattering detector), and glycans-containing fractions were analyzed by TLC. After pooled and concentrated, further purification by size-exclusion column using H<sub>2</sub>O as eluent (BioGel P2 gel packed in a column 1.6 cm x 50 cm, Biorad).

HPLC mobile phase condition for compounds **1** and **1a**:

Using an elution of 65.5% acetonitrile in water containing 100 mM ammonium formate (pH = 3.45) for 30 mins.

HPLC mobile phase condition for compounds **5** and **6**:

Using an elution of 74% acetonitrile in water containing 10 mM ammonium formate (pH = 3.45) for 30 mins, 74%-66% for 8 mins, and 66% for 12 mins.

HPLC mobile phase condition for compounds **8** and **9**:

Using an elution of 66% acetonitrile in water containing 10 mM ammonium formate (pH = 3.45) for 30

mins.

HPLC mobile phase condition for further purification of compound **11**:

Using an elution of 86.5-82% acetonitrile in water containing 10 mM ammonium formate (pH = 3.45) for 25 mins.

HPLC mobile phase condition for purification of compound **13a** and its  $\alpha(2,6)$ -sialylated regioisomer:

Using an elution of 74% acetonitrile in water containing 10 mM ammonium formate (pH = 3.45) for 30 mins.

HPLC mobile phase condition for purification of compounds **15a** and its  $\alpha(2,6)$ -sialylated regioisomers:

Using an elution of 76%-70% acetonitrile in water containing 100 mM ammonium formate (pH = 3.45) for 30 mins.

### **General Purification Procedure 3**

Follow the same procedure as described in general purification procedure 1, but the residues after C-18 reverse-phase silica column were directly purified by size-exclusion column using H<sub>2</sub>O as eluent (BioGel P2 gel packed in a column 1.6 cm x 50 cm, Biorad).



## Synthetic procedures and characterization of new compounds

Compound **2**,<sup>10</sup> and **2a**,<sup>11</sup> and Neu5Gc8Me<sup>12</sup> were reported previously.

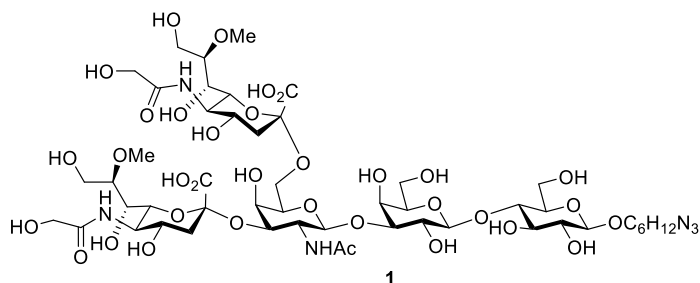

### GAA7-C<sub>6</sub>H<sub>12</sub>N<sub>3</sub> (Neu5Gc8Me $\alpha$ 2,3(Neu5Gc8Me $\alpha$ 2,6)-GalNAc $\beta$ 1,3-Gal $\beta$ 1,4-Glc $\beta$ C<sub>6</sub>H<sub>12</sub>N<sub>3</sub> (**1**).

**Sialylation catalyzed by Psp2,6ST.** Compound **4a** (8.4 mg, 8.5  $\mu$ mol) and Neu5Gc8Me (8.6 mg, 25.3  $\mu$ mol) were used as acceptor and donor, respectively, by following the general enzymatic synthetic procedure 1. After being shaken for 13 h, the reaction was quenched and purified by following general purification procedure 1. After purification, the product was lyophilized to give compound **1** in 77.3% yield (8.6 mg).

**Sialylation catalyzed by Pd2,6ST.** Compound **4a** (8.6 mg, 8.7  $\mu$ mol) and Neu5Gc8Me (8.8 mg, 25.9  $\mu$ mol) were used as acceptor and donor, respectively, by following the general enzymatic synthetic procedure 1. After being shaken for 2 h, the reaction was quenched and purified by following general purification procedure 2. After purification, the product was lyophilized to give compound **1** in 29.8% yield (3.4 mg).  $R_f = 0.21$  (*n*-PrOH/ H<sub>2</sub>O/ AcOH = 6/2/1 (v/v/v)); <sup>1</sup>H NMR (600 MHz, D<sub>2</sub>O)  $\delta$  4.68 (d, *J* = 8.5 Hz, 1H), 4.48 (d, *J* = 8.0 Hz, 1H), 4.43 (d, *J* = 7.9 Hz, 1H), 4.24 (dd, *J* = 2.9, 11.0 Hz, 1H), 4.18 (d, *J* = 3.2 Hz, 1H), 4.14-4.09 (m, 5H), 4.02-3.58 (m, 28H), 3.54-3.51 (m, 2H), 3.49 (s, 3H), 3.47 (s, 3H), 3.34-3.30 (m, 3H), 2.66-2.56 (m, 2H), 2.07 (s, 3H), 1.70 (t, *J* = 12.2 Hz, 1H), 1.67-1.59 (m, 5H), 1.43-1.36 (m, 4H); <sup>13</sup>C NMR (150 MHz, D<sub>2</sub>O)  $\delta$  176.77, 176.63, 175.92, 174.82, 174.62, 104.18, 104.13, 102.85, 101.54, 101.00, 82.91, 81.35, 81.09, 80.75, 75.72, 75.66, 75.58, 74.35, 73.70, 73.38, 73.24, 73.17, 71.45, 70.71, 69.30, 68.97, 68.70, 68.39, 68.24, 67.98, 64.48, 61.96(x3), 61.25, 60.66, 60.08, 58.65, 58.27, 52.87, 52.77, 52.10(x2), 41.22, 40.48, 29.54, 28.83, 26.62, 25.56, 23.30; HRMS (ESI) *m/z* calcd for C<sub>50</sub>H<sub>83</sub>N<sub>6</sub>O<sub>34</sub> [M-H]<sup>-</sup> 1311.4956, found 1311.4930.

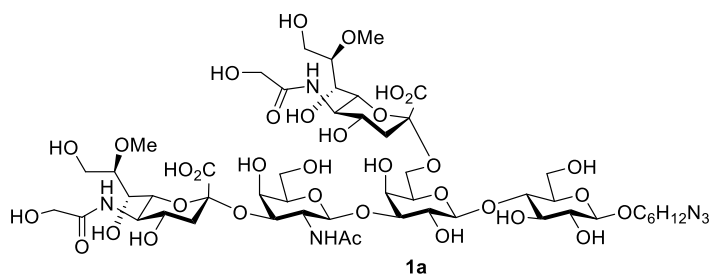

**Neu5Gc8Me $\alpha$ 2,3-GalNAc $\beta$ 1,3(Neu5Gc8Me $\alpha$ 2,6)-Gal $\beta$ 1,4-Glc $\beta$ C<sub>6</sub>H<sub>12</sub>N<sub>3</sub> (**1a**).** The compound **1a** was synthesized from **4a** by following the same procedure as mentioned in the synthesis of compound **1**. After purification, the product was lyophilized to give compound **1a** in 20.2% yield (2.3 mg).  $R_f = 0.21$  (*n*-

PrOH/ H<sub>2</sub>O/ AcOH = 6/2/1 (v/v/v)); <sup>1</sup>H NMR (600 MHz, D<sub>2</sub>O) δ 4.70 (d, *J* = 8.6 Hz, 1H), 4.49 (d, *J* = 8.1 Hz, 1H), 4.46 (d, *J* = 7.9 Hz, 1H), 4.26 (dd, *J* = 3.0, 11.0 Hz, 1H), 4.19 (d, *J* = 3.2 Hz, 1H), 4.13 (s, 4H), 4.05-3.83 (m, 12H), 3.82-3.73 (m, 8H), 3.73-3.58 (m, 9H), 3.58-3.47 (m, 9H), 3.35-3.30 (m, 3H), 2.65 (dd, *J* = 4.5, 12.3 Hz, 1H), 2.59 (dd, *J* = 4.2, 12.1 Hz, 1H), 2.08 (s, 3H), 1.71-1.59 (m, 6H), 1.45-1.37 (m, 4H); <sup>13</sup>C NMR (150 MHz, D<sub>2</sub>O) δ 176.74, 176.68, 175.90, 174.69, 174.53, 103.88, 103.84, 102.96, 101.54, 101.19, 82.94, 81.36, 81.07, 79.49, 75.94, 75.72, 75.44, 74.09, 73.76, 73.26, 73.21, 73.17, 71.47, 70.98, 69.35, 69.05, 68.72, 68.39, 68.20, 67.97, 64.35, 62.17, 61.96(x2), 61.08, 60.58, 60.09, 58.59, 58.27, 52.85(x2), 52.09(x2), 41.20, 40.28, 29.53, 28.82, 26.61, 25.55, 23.29; HRMS (ESI) *m/z* calcd for C<sub>50</sub>H<sub>83</sub>N<sub>6</sub>O<sub>34</sub> [M-H]<sup>-</sup> 1311.4956, found 1311.4912.

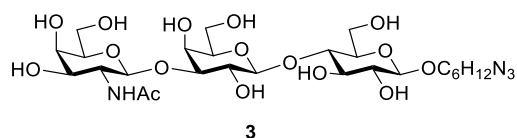

**GalNAcβ1,3-Galβ1,4-GlcβC<sub>6</sub>H<sub>12</sub>N<sub>3</sub> (3).** Compound **2** (70.0 mg, 149.7 μmol) and GalNAc (50.0 mg, 226.0 μmol) were used as acceptor and donor, respectively, by following the general enzymatic synthetic procedure 2. After being shaken for 30 h, the reaction was quenched and purified by following general purification procedure 3. After purification, the product was lyophilized to give compound **3** in 97.6% yield (98.0 mg). *R<sub>f</sub>* = 0.63 (*n*-PrOH/ H<sub>2</sub>O/ AcOH = 6/2/1 (v/v/v)); <sup>1</sup>H NMR (600 MHz, D<sub>2</sub>O) δ 4.63 (d, *J* = 8.5 Hz, 1H), 4.48 (d, *J* = 8.0 Hz, 1H), 4.44 (d, *J* = 7.9 Hz, 1H), 4.16 (d, *J* = 3.0 Hz, 1H), 4.01-3.90 (m, 4H), 3.82-3.58 (m, 14H), 3.36-3.27 (m, 3H), 2.05 (s, 3H), 1.68-1.60 (m, 4H), 1.44-1.38 (m, 4H); <sup>13</sup>C NMR (150 MHz, D<sub>2</sub>O) δ 176.06, 104.26, 103.93, 103.01, 82.73, 79.39, 75.95, 75.85, 75.73, 75.43, 73.81, 71.73, 71.47, 71.05, 69.45, 68.75, 61.96, 61.92, 61.09, 53.56, 52.10, 29.56, 28.85, 26.63, 25.57, 23.19; HRMS (ESI) *m/z* calcd for C<sub>26</sub>H<sub>46</sub>N<sub>4</sub>O<sub>16</sub>Na [M+Na]<sup>+</sup> 693.2801, found 693.2818.

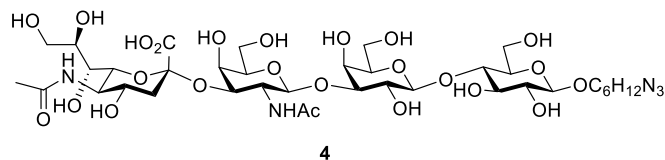

**Neu5Acα2,3-GalNAcβ1,3-Galβ1,4-GlcβC<sub>6</sub>H<sub>12</sub>N<sub>3</sub> (4).**

**The sialylation catalyzed by Cst-I.** Compound **3** (70.0 mg, 104.4 μmol) and Neu5Ac (161.4 mg, 521.9 μmol) were used as acceptor and donor, respectively, by following the general enzymatic synthetic procedure 1. After being shaken for 38 h, the reaction was quenched and purified by following general purification procedure 1. After purification, the product was lyophilized to give compound **4** in 70.2% yield (70.5 mg).

**The sialylation catalyzed by PmST3.** Compound **3** (7.2 mg, 10.7 μmol) was used as acceptor for sialylation by following the procedure described in the sialylation catalyzed by Cst-I, but the Cst-I enzyme was replaced with PmST3 in 1.1 mg/mL. After purification, the product was lyophilized to give compound **4** in 76.4% yield (7.9 mg).

**The chemical *N*-acetylation of compound 13.** Compound **13** (11.8 mg, 12.8 μmol), NaHCO<sub>3</sub> (6.7 mg,

80.0  $\mu\text{mol}$ ), and  $\text{Ac}_2\text{O}$  (7.6  $\mu\text{L}$ , 80.0  $\mu\text{mol}$ ) were used by following the general *N*-acetylation procedure. Fractions containing the desired product were pooled and lyophilized to give compound **4** in 92.5% (11.4 mg).  $R_f = 0.52$  (*n*-PrOH/  $\text{H}_2\text{O}$ / AcOH = 6/2/1 (v/v/v));  $^1\text{H}$  NMR (600 MHz,  $\text{D}_2\text{O}$ )  $\delta$  4.71 (d,  $J = 8.5$  Hz, 1H), 4.45 (d,  $J = 8.0$  Hz, 1H), 4.42 (d,  $J = 7.9$  Hz, 1H), 4.17 (dd,  $J = 2.9, 10.9$  Hz, 1H), 4.13 (d,  $J = 3.2$  Hz, 1H), 3.99-3.83 (m, 6H), 3.79-3.56 (m, 17H), 3.45 (dd,  $J = 1.7, 10.4$  Hz, 1H), 3.34-3.25 (m, 3H), 2.67 (dd,  $J = 4.6, 12.5$  Hz, 1H), 2.06 (s, 3H), 2.01 (s, 3H), 1.66-1.56 (m, 5H), 1.42-1.32 (m, 4H);  $^{13}\text{C}$  NMR (150 MHz,  $\text{D}_2\text{O}$ )  $\delta$  176.16, 175.86, 175.08, 103.88, 103.79, 103.01, 100.44, 82.75, 79.40, 75.86, 75.72(x2), 75.43, 73.78(x3), 72.64, 71.46, 70.98, 69.39, 69.25, 69.04, 67.94, 63.58, 61.98, 61.94, 61.06, 52.88, 52.09(x2), 49.43, 49.29, 49.14, 49.00, 48.85, 48.71, 48.56, 40.69, 29.57, 28.86, 26.64, 25.58, 23.37, 22.93; HRMS (ESI)  $m/z$  calcd for  $\text{C}_{37}\text{H}_{62}\text{N}_5\text{O}_{24}$   $[\text{M}-\text{H}]^-$  960.3790, found 960.3767.

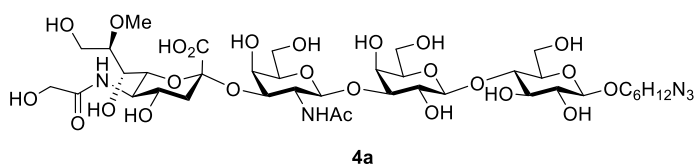

**Neu5Gc8Mea2,3-GalNAc $\beta$ 1,3-Gal $\beta$ 1,4-Glc $\beta$ C $_6$ H $_{12}$ N $_3$  (4a).** Compound **13a** (10.0 mg, 10.5  $\mu\text{mol}$ ),  $\text{NaHCO}_3$  (8.8 mg, 105  $\mu\text{mol}$ ), and  $\text{Ac}_2\text{O}$  (9.9  $\mu\text{L}$ , 105  $\mu\text{mol}$ ) were used by following the general *N*-acetylation procedure. Fractions containing the desired product were pooled and lyophilized to give compound **4a** in 91.0% (9.5mg).  $R_f = 0.36$  (*n*-PrOH/  $\text{H}_2\text{O}$ / AcOH = 6/2/1 (v/v/v));  $^1\text{H}$  NMR (600 MHz,  $\text{D}_2\text{O}$ )  $\delta$  4.69 (d,  $J = 8.5$  Hz, 1H), 4.46 (d,  $J = 8.1$  Hz, 1H), 4.43 (d,  $J = 7.9$  Hz, 1H), 4.24 (d,  $J = 2.9, 11.0$  Hz, 1H), 4.14 (d,  $J = 3.2$  Hz, 1H), 4.11 (s, 2H), 4.01-3.85 (m, 7H), 3.80-3.56 (m, 16H), 3.53-3.50 (m, 1H), 3.46 (s, 3H), 3.33-3.27 (m, 3H), 2.59 (dd,  $J = 4.0, 12.2$  Hz, 1H), 2.07 (s, 3H), 1.66-1.60 (m, 5H), 1.41-1.38 (m, 4H);  $^{13}\text{C}$  NMR (150 MHz,  $\text{D}_2\text{O}$ )  $\delta$  176.71, 175.84, 174.52, 104.01, 103.91, 103.01, 100.78, 82.66, 81.30, 79.56, 75.85, 75.71, 75.68, 75.45, 73.80, 73.32(x2), 71.42, 71.02, 69.42, 68.84, 68.19, 68.09, 61.98(x2), 61.90, 61.14, 60.30, 58.33, 52.91, 52.13, 52.10, 40.57, 29.54, 28.81, 26.60, 25.55, 23.29; HRMS (ESI)  $m/z$  calcd for  $\text{C}_{38}\text{H}_{65}\text{N}_5\text{O}_{25}\text{Na}$   $[\text{M}+\text{Na}]^+$  1014.3866, found 1014.3860.

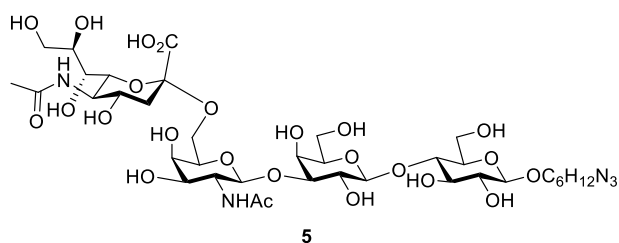

**Neu5Ac $\alpha$ 2,6-GalNAc $\beta$ 1,3-Gal $\beta$ 1,4-Glc $\beta$ C $_6$ H $_{12}$ N $_3$  (5).**

**The sialylation catalyzed by PmST1.** Compound **3** (11.0 mg, 16.4  $\mu\text{mol}$ ) and Neu5Ac (25.4 mg, 82.0  $\mu\text{mol}$ ) were used as acceptor and donor, respectively, by following the general enzymatic synthetic procedure 1. After being shaken for 20 h, the reaction was quenched and purified by following general purification procedure 1. After purification, the product was lyophilized to give compound **5** in 82.2% yield (13.0 mg).

**The sialylation catalyzed by Pd2,6ST or Psp2,6ST using 1.2 equiv. of sialic acid.** Compound **3** (5.0 mg, 7.5  $\mu$ mol) and Neu5Ac (2.8 mg, 8.9  $\mu$ mol) were used as acceptor and donor, respectively, by following the general enzymatic synthetic procedure 1. After being shaken for 8 h, the reaction was quenched and purified by following general purification procedure 2. After purification, the product was lyophilized to give compound **5** in 66.9% yield (4.8 mg) by Pd2,6ST or 57.2% yield (4.1 mg) by Psp2,6ST.  $R_f = 0.43$  (*n*-PrOH/ H<sub>2</sub>O/ AcOH = 6/2/1 (v/v/v)); <sup>1</sup>H NMR (600 MHz, D<sub>2</sub>O)  $\delta$  4.60 (d, *J* = 8.4 Hz, 1H), 4.48 (d, *J* = 8.0 Hz, 1H), 4.44 (d, *J* = 7.9 Hz, 1H), 4.18 (d, *J* = 3.3 Hz, 1H), 3.98 (dd, *J* = 1.9, 12.2 Hz, 1H), 3.96-3.86 (m, 6H), 3.83-3.77 (m, 4H), 3.75-3.61 (m, 11H), 3.60-3.57 (m, 3H), 3.35-3.28 (m, 3H), 2.73 (dd, *J* = 4.7, 12.4 Hz, 1H), 2.04 (s, 3H), 2.03 (s, 3H), 1.68-1.59 (m, 5H), 1.44-1.36 (m, 4H); <sup>13</sup>C NMR (150 MHz, D<sub>2</sub>O)  $\delta$  176.04, 175.99, 174.37, 104.13, 103.88, 102.97, 101.34, 83.02, 79.40, 75.93, 75.72, 75.42, 74.17, 73.76, 73.56, 72.69, 71.61, 71.47, 70.96, 69.35, 69.17(x2), 68.64, 64.38, 63.58, 62.12, 61.07, 53.44, 52.83, 52.08, 41.15, 29.54, 28.83, 26.61, 25.55, 23.18, 22.97; HRMS (ESI) *m/z* calcd for C<sub>37</sub>H<sub>62</sub>N<sub>5</sub>O<sub>24</sub> [M-H]<sup>-</sup> 960.3790, found 960.3756.

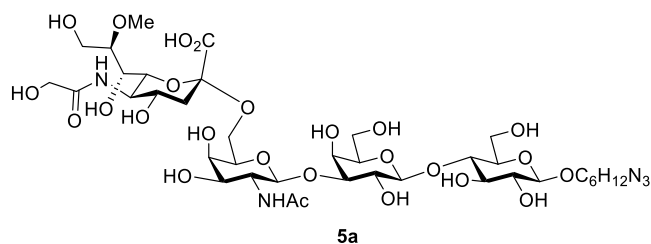

**Neu5Gc8Mea2,6-GalNAc $\beta$ 1,3-Gal $\beta$ 1,4-Glc $\beta$ C<sub>6</sub>H<sub>12</sub>N<sub>3</sub> (5a).** Compound **3** (3.0 mg, 4.5  $\mu$ mol) and Neu5Gc8Me (4.6 mg, 13.4  $\mu$ mol) were used as acceptor and donor, respectively, by following the similar procedure as described in the synthesis of compound **5** by PmST1. After purification, the product was lyophilized to give compound **5a** in 69.9% yield (3.1 mg).  $R_f = 0.33$  (*n*-PrOH/ H<sub>2</sub>O/ AcOH = 6/2/1 (v/v/v)); <sup>1</sup>H NMR (500 MHz, D<sub>2</sub>O)  $\delta$  4.58 (d, *J* = 8.4 Hz, 1H), 4.45 (d, *J* = 8.0 Hz, 1H), 4.41 (d, *J* = 7.9 Hz, 1H), 4.15 (d, *J* = 2.8 Hz, 1H), 4.09 (s, 2H), 4.03 (d, *J* = 10.5 Hz, 1H), 4.00-3.87 (m, 7H), 3.80-3.50 (m, 17H), 3.46 (s, 3H), 3.32-3.23 (m, 3H), 2.61 (dd, *J* = 4.3, 12.2 Hz, 1H), 2.01 (s, 3H), 1.67-1.53 (m, 5H), 1.43-1.30 (m, 4H); <sup>13</sup>C NMR (125 MHz, D<sub>2</sub>O)  $\delta$  176.74, 176.08, 174.62, 104.13, 103.90, 102.97, 101.63, 82.91, 81.43, 79.38, 75.93, 75.74, 75.43, 74.27, 73.77, 73.28, 71.59, 71.50, 71.04, 69.39, 68.65, 68.61, 68.11, 64.21, 62.14, 61.95, 61.07, 60.60, 58.59, 53.47, 52.86, 52.09, 41.15, 29.55, 28.85, 26.63, 25.57, 23.18; HRMS (ESI) *m/z* calcd for C<sub>38</sub>H<sub>64</sub>N<sub>5</sub>O<sub>25</sub> [M-H]<sup>-</sup> 990.3896, found 990.3884.

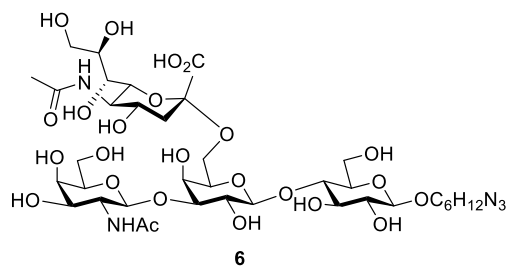

**GalNAc $\beta$ 1,3(Neu5Ac $\alpha$ 2,6-)-Gal $\beta$ 1,4-Glc $\beta$ C<sub>6</sub>H<sub>12</sub>N<sub>3</sub> (6).**

**The sialylation catalyzed by Pd2,6ST or Psp2,6ST.** The compound **6** was synthesized from **3** by

following the procedure as described in the synthesis of compound **5**. After purification, the product was lyophilized to give compound **6** in 7.3% yield (0.5 mg) by Pd2,6ST or 5.4% yield (0.4 mg) by Psp2,6ST.  $R_f = 0.42$  (*n*-PrOH/ H<sub>2</sub>O/ AcOH) = 6/2/1 (v/v/v)); <sup>1</sup>H NMR (600 MHz, D<sub>2</sub>O)  $\delta$  4.57 (d, *J* = 8.5 Hz, 1H), 4.46 (d, *J* = 8.1 Hz, 1H), 4.39 (d, *J* = 8.0 Hz, 1H), 4.16 (d, *J* = 3.2 Hz, 1H), 3.96-3.89 (m, 5H), 3.88-3.80 (m, 3H), 3.80-3.74 (m, 3H), 3.74-3.58 (m, 10H), 3.58-3.52 (m, 5H), 3.32-3.27 (m, 3H), 2.67 (dd, *J* = 4.7, 12.3 Hz, 1H), 2.01 (s, 3H), 2.00 (s, 3H), 1.70 (t, *J* = 12.3 Hz, 1H), 1.65-1.56 (m, 4H), 1.41-1.35 (m, 4H); <sup>13</sup>C NMR (150 MHz, D<sub>2</sub>O)  $\delta$  176.08, 175.87, 174.43, 104.36, 104.21, 102.86, 101.25, 82.99, 80.62, 75.95, 75.67, 75.60, 74.20, 73.70, 73.49, 72.71, 71.78, 71.46, 70.72, 69.32(x2), 69.26, 68.75, 64.38, 63.59, 61.94, 61.25, 53.52, 52.76, 52.10, 49.44, 49.29, 49.14, 49.00, 48.85, 48.71, 48.57, 41.11, 29.55, 28.84, 26.63, 25.58, 23.19, 23.00; HRMS (ESI) *m/z* calcd for C<sub>37</sub>H<sub>62</sub>N<sub>5</sub>O<sub>24</sub> [M-H]<sup>-</sup> 960.3790, found 960.3782.

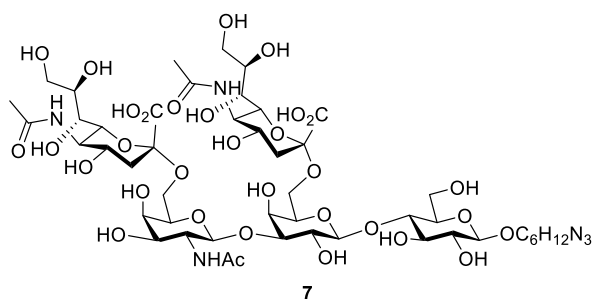

**Neu5Ac $\alpha$ 2,6-GalNAc $\beta$ 1,3(Neu5Ac $\alpha$ 2,6)-Gal $\beta$ 1,4-Glc $\beta$ C<sub>6</sub>H<sub>12</sub>N<sub>3</sub> (7).**

**The sialylation catalyzed by Pd2,6ST or Psp2,6ST using 1.2 equiv. of sialic acid.** The compound **7** was synthesized from **3** by following the same procedure as described in the synthesis compound **5**. After purification, the product was lyophilized to give compound **7** in 1.6% yield (0.2 mg) by Pd2,6ST or 4.5% yield (0.4 mg) by Psp2,6ST.

**The sialylation of compound 5 by Pd2,6ST.** Compound **5** (2.3 mg, 2.4  $\mu$ mol) and Neu5Ac (3.7 mg, 12.0  $\mu$ mol) were used as acceptor and donor, respectively, by following the general enzymatic synthetic procedure 1. After being shaken for 8 h, the reaction was quenched and purified by following general purification procedure 1. After purification, the product was lyophilized to give compound **7** in 96.8% yield (2.9 mg).

**The sialylation of compound 3 by Pd2,6ST.** Compound **3** (13.0 mg, 19.4  $\mu$ mol) and Neu5Ac (29.9 mg, 96.9  $\mu$ mol) were used as acceptor and donor, respectively, by following the general enzymatic synthetic procedure 1. After being shaken for 8 h, the reaction was quenched and purified by following general purification procedure 1. After purification, the product was lyophilized to give compound **7** in 86.0% yield (20.9 mg).  $R_f = 0.14$  (*n*-PrOH/ H<sub>2</sub>O/ AcOH = 6/2/1 (v/v/v)); <sup>1</sup>H NMR (500 MHz, D<sub>2</sub>O)  $\delta$  4.58 (d, *J* = 8.4 Hz, 1H), 4.46 (d, *J* = 8.1 Hz, 1H), 4.39 (d, *J* = 7.9 Hz, 1H), 4.12 (d, *J* = 2.6 Hz, 1H), 3.98-3.83 (m, 10H), 3.82-3.73 (m, 4H), 3.71-3.51 (m, 18H), 3.32-3.27 (m, 3H), 2.70 (dd, *J* = 4.5, 12.3 Hz, 1H), 2.68 (dd, *J* = 4.5, 12.3 Hz, 1H), 2.01 (s, 3H), 2.00 (s, 3H), 2.00 (s, 3H), 1.72 (t, *J* = 12.3 Hz, 1H), 1.65 (t, *J* = 12.3 Hz, 1H), 1.64-1.55 (m, 4H), 1.43-1.32 (m, 4H); <sup>13</sup>C NMR (125 MHz, D<sub>2</sub>O)  $\delta$  176.03, 176.01, 175.79, 174.42(x2), 104.17, 104.00, 102.82, 101.47, 101.23, 82.52, 80.84, 75.72, 75.56, 74.45, 74.10, 73.66, 73.62, 73.44, 72.68, 72.59, 71.65, 71.44, 70.91, 69.41, 69.37, 69.33, 69.16, 69.08, 68.56, 64.86, 64.16, 63.63,

63.59, 61.29, 53.44, 52.95, 52.73, 52.09, 49.51, 49.34, 49.17, 49.00, 48.82, 48.65, 48.48, 41.23, 41.03, 29.54, 28.84, 26.62, 25.57, 23.19, 23.02, 22.99; HRMS (ESI)  $m/z$  calcd for  $C_{48}H_{79}N_6O_{32}$   $[M-H]^-$  1251.4744, found 1251.4728.

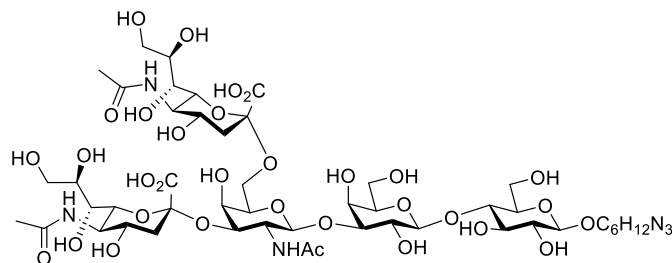

8

**Neu5Aca2,3(Neu5Aca2,6)-GalNAcβ1,3-Galβ1,4-GlcβC<sub>6</sub>H<sub>12</sub>N<sub>3</sub> (8).**

The sialylation catalyzed by Pd2,6ST or Psp2,6ST using 1.5 equiv. sialic acid. Compound 4 (4.2 mg, 4.4 μmol) and Neu5Ac (2.0 mg, 6.5 μmol) were used as acceptor and donor, respectively, by following the general enzymatic synthetic procedure 1. After being shaken for 10 h, the reaction was quenched and purified by following general purification procedure 2. The fractions with product were lyophilized to give compound 8 in 58.5% yield (3.2 mg) by Pd2,6ST or 95.0% yield (5.2 mg) by Psp2,6ST.  $R_f = 0.25$  ( $n$ -PrOH/ H<sub>2</sub>O/ AcOH = 6/2/1 (v/v/v)); <sup>1</sup>H NMR (700 MHz, D<sub>2</sub>O) δ 4.72 (d,  $J = 8.5$  Hz, 1H), 4.48 (d,  $J = 8.0$  Hz, 1H), 4.43 (d,  $J = 7.9$  Hz, 1H), 4.22-4.15 (m, 2H), 4.00-3.86 (m, 9H), 3.85-3.56 (m, 21H), 3.48 (d,  $J = 10.4$  Hz, 1H), 3.37-3.29 (m, 3H), 2.75-2.67 (m, 2H), 2.08 (s, 3H), 2.04 (s, 3H), 2.03 (s, 3H), 1.73 (t,  $J = 12.2$  Hz, 1H), 1.68-1.59 (m, 5H), 1.45-1.37 (m, 4H); <sup>13</sup>C NMR (175 MHz, D<sub>2</sub>O) δ 176.14, 175.86, 175.84, 175.06, 174.40, 104.14, 103.84, 102.85, 101.23, 100.51, 82.94, 80.68, 75.70, 75.66, 75.58, 74.21, 73.82, 73.73, 73.68, 73.47, 72.68, 72.61, 71.44, 70.68, 69.33, 69.30, 69.29, 69.21, 69.00, 67.97, 64.40, 63.58, 63.54, 61.94, 61.24, 52.82, 52.74, 52.08(x2), 41.08, 40.60, 29.53, 28.82, 26.61, 25.56, 23.36, 23.00, 22.94; HRMS (ESI)  $m/z$  calcd for  $C_{48}H_{79}N_6O_{32}$   $[M-H]^-$  1251.4744, found 1251.4745.

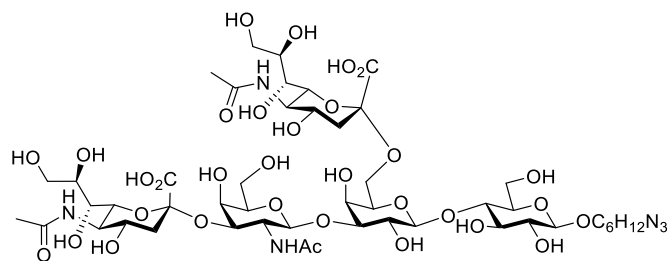

9

**Neu5Aca2,3-GalNAcβ1,3(Neu5Aca2,6)-Galβ1,4-GlcβC<sub>6</sub>H<sub>12</sub>N<sub>3</sub> (9).** Compound 4 (29.5 mg, 30.7 μmol) and Neu5Ac (12.3 mg, 39.9 μmol) were used as acceptor and donor, respectively. The experimental procedure is similar as described in the synthesis of compound 8 by Pd2,6ST. After purification, the product was lyophilized to give compound 9 in 16.1% yield (6.2 mg).  $R_f = 0.25$  ( $n$ -PrOH/ H<sub>2</sub>O/ AcOH = 6/2/1 (v/v/v)); <sup>1</sup>H NMR (600 MHz, D<sub>2</sub>O) δ 4.71 (d,  $J = 8.6$  Hz, 1H), 4.48 (d,  $J = 8.0$  Hz, 1H), 4.46 (d,  $J = 8.0$  Hz, 1H), 4.22-4.16 (m, 2H), 3.99-3.87 (m, 9H), 3.82-3.73 (m, 8H), 3.72-3.56 (m, 13H), 3.49 (dd,  $J = 1.7, 10.4$ , 1H), 3.35-3.28 (m, 3H), 2.72 (dd,  $J = 4.7, 12.4$ , 1H), 2.68 (dd,  $J = 4.6, 12.4$ , 1H), 2.08 (s, 3H),

2.034 (s, 3H), 2.032 (s, 3H), 1.68-1.60 (m, 6H), 1.43-1.38 (m, 4H);  $^{13}\text{C}$  NMR (150 MHz,  $\text{D}_2\text{O}$ )  $\delta$  176.11, 175.95, 175.88, 174.75, 174.20, 103.86, 103.65, 102.98, 101.18, 100.59, 83.11, 79.45, 75.96, 75.74, 75.44, 73.97, 73.77(x2), 73.73, 73.56, 72.54(x2), 71.50, 70.90, 69.32(x2), 69.23, 69.22, 69.00, 68.07, 64.38, 63.62, 63.60, 62.18, 61.07, 52.80, 52.78, 52.10, 52.04, 41.01, 40.37, 29.55, 28.85, 26.63, 25.57, 23.35, 22.99, 22.96; HRMS (ESI)  $m/z$  calcd for  $\text{C}_{48}\text{H}_{78}\text{N}_6\text{O}_{32}$   $[\text{M}-2\text{H}]^{2-}$  625.2330, found 625.2277.

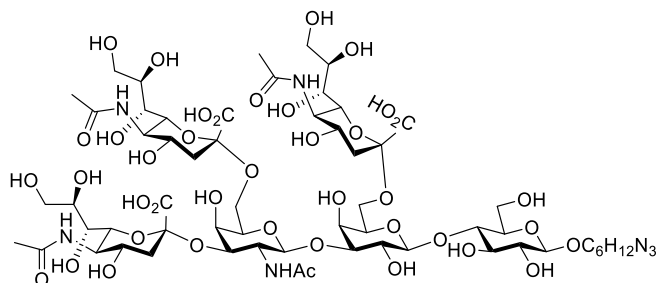

10

**Neu5Ac $\alpha$ 2,3(Neu5Ac $\alpha$ 2,6)-GalNAc $\beta$ 1,3(Neu5Ac $\alpha$ 2,6)-Gal $\beta$ 1,4-Glc $\beta$ C $_6\text{H}_{12}\text{N}_3$  (10).**

The sialylation of compound **8** was catalyzed by Pd2,6ST. Compound **8** (8.2 mg, 6.5  $\mu\text{mol}$ ) and Neu5Ac (6.1 mg, 19.6  $\mu\text{mol}$ ) were used as acceptor and donor, respectively. The experimental procedure is similar as described in the synthesis of compound **8** by Pd2,6ST. After purification, the product was lyophilized to give compound **10** in 89.1% yield (9.0 mg).

The sialylation of compound **4** by Pd2,6ST with 1.5 equiv. sialic acid. The compound **10** was synthesized from **4** by following the procedure as described in the synthesis of compound **8**. After purification, the product was lyophilized to give compound **10** in 5.9% yield (0.4 mg).  $R_f = 0.12$  ( $n\text{-PrOH}/\text{H}_2\text{O}/\text{AcOH} = 6/2/1$  (v/v/v));  $^1\text{H}$  NMR (500 MHz,  $\text{D}_2\text{O}$ )  $\delta$  4.71 (d,  $J = 8.5$  Hz, 1H), 4.47 (d,  $J = 8.1$  Hz, 1H), 4.41 (d,  $J = 7.9$  Hz, 1H), 4.16 (dd,  $J = 1.3, 11.0$  Hz, 1H), 4.13 (d,  $J = 1.3$  Hz, 1H), 4.00-3.85 (m, 12H), 3.83-3.52 (m, 25H), 3.46 (d,  $J = 10.3$ , 1H), 3.35-3.27 (m, 3H), 2.73-2.62 (m, 3H), 2.05 (s, 3H), 2.01 (s, 9H), 1.74 (t,  $J = 12.2$  Hz, 1H), 1.69-1.55 (m, 6H), 1.44-1.32 (m, 4H);  $^{13}\text{C}$  NMR (125 MHz,  $\text{D}_2\text{O}$ )  $\delta$  176.09, 175.94, 175.84, 175.79, 174.97, 174.45, 174.40, 104.15, 103.49, 102.84, 101.44, 101.24, 100.73, 82.50, 80.95, 75.76, 75.58, 74.48, 73.94, 73.75(x2), 73.67, 73.61, 73.44, 72.63(x2), 72.58, 71.45, 70.91, 69.45, 69.41(x2), 69.30, 69.26, 69.15, 69.04, 68.03, 64.91, 64.20, 63.64(x2), 63.57, 61.31, 52.97, 52.79, 52.74, 52.10, 52.07, 49.52, 49.35, 49.17, 49.00, 48.83, 48.65, 48.48, 41.24, 41.04, 40.44, 29.56, 28.86, 26.64, 25.59, 23.38, 23.03, 23.01, 22.96; HRMS (ESI)  $m/z$  calcd for  $\text{C}_{59}\text{H}_{94}\text{N}_7\text{Na}_2\text{O}_{40}$   $[\text{M}-3\text{H}+2\text{Na}]^-$  1586.5337, found 1586.5340.

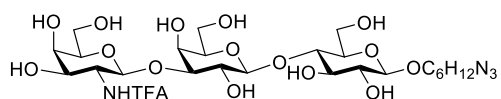

11

**GalNTFA $\beta$ 1,3-Gal $\beta$ 1,4-Glc $\beta$ C $_6\text{H}_{12}\text{N}_3$  (11).** Compound **2** (10.0 mg, 21.4  $\mu\text{mol}$ ) and *N*-trifluoroacetyl galactosamine (GalNTFA) $^{13}$  (11.8 mg, 42.8  $\mu\text{mol}$ ) were used as acceptor and donor, respectively, by following the general enzymatic synthetic procedure 2. After being shaken for 30 h, the reaction was quenched and purified by following general purification procedure 2. The fractions with

product were lyophilized to give compound **11** in 92.2% yield (14.3 mg).  $R_f = 0.72$  ( $n$ -PrOH/ H<sub>2</sub>O/ AcOH = 6/2/1 (v/v/v)); <sup>1</sup>H NMR (500 MHz, D<sub>2</sub>O)  $\delta$  4.72 (d,  $J = 8.4$  Hz, 1H), 4.46 (d,  $J = 8.0$  Hz, 1H), 4.41 (d,  $J = 7.8$  Hz, 1H), 4.16 (d,  $J = 2.9$  Hz, 1H), 4.00 (dd,  $J = 8.4, 10.9$  Hz, 1H), 3.95-3.89 (m, 3H), 3.86 (dd,  $J = 3.2, 11.0$  Hz, 1H), 3.81-3.66 (m, 9H), 3.65-3.60 (m, 2H), 3.60-3.54 (m, 2H), 3.34-3.25 (m, 3H), 1.66-1.57 (m, 4H), 1.42-1.34 (m, 4H); <sup>13</sup>C NMR (125 MHz, D<sub>2</sub>O)  $\delta$  160.67 (q,  $^2J_{CF} = 37$  Hz, NHCOCF<sub>3</sub>), 116.88 (q,  $^1J_{CF} = 286$  Hz, NHCOCF<sub>3</sub>), 103.99, 103.54, 103.11, 83.14, 79.35, 76.12, 75.89, 75.76, 75.49, 73.88, 71.47, 71.05, 70.98, 69.40, 68.76, 61.96, 61.94, 61.11, 54.46, 52.12, 29.65, 28.94, 26.72, 25.66; HRMS (ESI)  $m/z$  calcd for C<sub>26</sub>H<sub>43</sub>F<sub>3</sub>N<sub>4</sub>O<sub>16</sub>Na [M+Na]<sup>+</sup> 747.2524, found 747.2500.

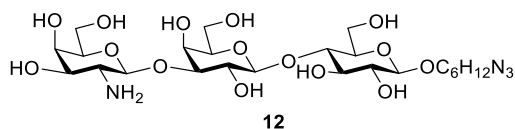

**GalNH<sub>2</sub>β1,3-Galβ1,4-GlcβC<sub>6</sub>H<sub>12</sub>N<sub>3</sub> (12).** Compound **11** (14.3 mg, 19.7 μmol) was deprotected by following the general procedure for deprotection of NHTFA group. The fractions with product were lyophilized to give compound **12** in quantitative yield (12.2 mg).  $R_f = 0.64$  ( $n$ -PrOH/ H<sub>2</sub>O/ AcOH = 6/2/1 (v/v/v)); <sup>1</sup>H NMR (500 MHz, D<sub>2</sub>O)  $\delta$  4.50 (d,  $J = 8.2$  Hz, 1H), 4.48 (d,  $J = 7.8$  Hz, 1H), 4.47 (d,  $J = 7.9$  Hz, 1H), 4.17 (d,  $J = 2.7$  Hz, 1H), 3.97 (d,  $J = 11.8$  Hz, 1H), 3.94-3.88 (m, 1H), 3.84 (d,  $J = 2.6$  Hz, 1H), 3.81-3.72 (m, 7H), 3.71-3.60 (m, 6H), 3.60-3.56 (m, 1H), 3.53 (dd,  $J = 2.9, 10.4$  Hz, 1H), 3.34-3.26 (m, 3H), 2.89 (t,  $J = 9.2$  Hz, 1H), 1.65-1.58 (m, 4H), 1.41-1.36 (m, 4H); <sup>13</sup>C NMR (125 MHz, D<sub>2</sub>O)  $\delta$  106.26, 103.66, 103.00, 83.07, 79.37, 76.15, 75.96, 75.70, 75.43, 73.87, 73.79, 71.50, 71.13, 69.34, 68.81, 62.08, 61.93, 61.07, 54.16, 52.09, 29.54, 28.84, 26.62, 25.56; HRMS (ESI)  $m/z$  calcd for C<sub>24</sub>H<sub>45</sub>N<sub>4</sub>O<sub>15</sub> [M+H]<sup>+</sup> 629.2876, found 629.2875.

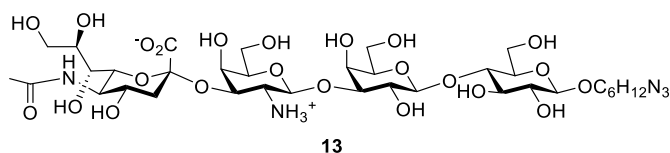

**Neu5Acα2,3-GalNH<sub>2</sub>β1,3-Galβ1,4-GlcβC<sub>6</sub>H<sub>12</sub>N<sub>3</sub> (13).** Compound **12** (10.0 mg, 15.9 μmol) and Neu5Ac (14.8 mg, 47.7 μmol) were used as acceptor and donor, respectively. The experimental procedure is similar as described in the synthesis of compound **5** by PmST1. After purification, the product was lyophilized to give compound **13** in 86.1% (12.6 mg).  $R_f = 0.43$  ( $n$ -PrOH/ H<sub>2</sub>O/ AcOH = 6/2/1 (v/v/v)); <sup>1</sup>H NMR (500 MHz, D<sub>2</sub>O)  $\delta$  4.67 (d,  $J = 8.1$  Hz, 1H), 4.50 (d,  $J = 7.9$  Hz, 1H), 4.47 (d,  $J = 8.0$  Hz, 1H), 4.17 (d,  $J = 2.8$  Hz, 1H), 4.08 (dd,  $J = 2.8, 10.4$  Hz, 1H), 3.96 (dd,  $J = 11.4$  Hz, 1H), 3.93-3.56 (m, 22H), 3.33-3.26 (m, 3H), 3.03 (t,  $J = 9.3$  Hz, 1H), 2.77 (dd,  $J = 4.4, 12.1$  Hz, 1H), 2.02 (s, 3H), 1.77 (t,  $J = 12.1$  Hz, 1H), 1.67-1.55 (m, 4H), 1.45-1.34 (m, 4H); <sup>13</sup>C NMR (125 MHz, D<sub>2</sub>O)  $\delta$  175.97, 174.59, 105.10, 103.53, 103.00, 100.52, 83.07, 79.27, 76.00, 75.94, 75.70, 75.42, 73.81(x2), 73.79, 72.66, 71.50, 71.11, 69.37, 69.30, 68.97, 67.15, 63.51, 61.96, 61.94, 61.06, 52.74, 52.68, 52.09, 40.95, 29.55, 28.84, 26.62, 25.57, 22.99; HRMS (ESI)  $m/z$  calcd for C<sub>35</sub>H<sub>61</sub>N<sub>5</sub>O<sub>23</sub>Na [M+Na]<sup>+</sup> 942.3650, found 942.3677.



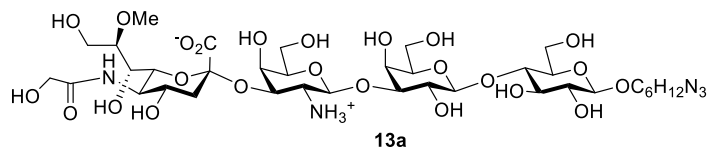

**Neu5Gc8Mea2,3-GalNH<sub>2</sub>β1,3-Galβ1,4-GlcβC<sub>6</sub>H<sub>12</sub>N<sub>3</sub> (13a).** Compound **12** (60.0 mg, 95.4 μmol) and Neu5Gc8Me (81.0 mg, 238.6 μmol) were used as acceptor and donor, respectively. The experimental procedure is similar as described in the synthesis of compound **5** by PmST1, and the product was purified by following the general purification procedure 2. The fractions with product were lyophilized to give compound **13a** in 11.0% yield (10.0 mg).  $R_f = 0.44$  (*n*-PrOH/ H<sub>2</sub>O/ AcOH = 6/2/1 (v/v/v)); <sup>1</sup>H NMR (500 MHz, D<sub>2</sub>O) δ 4.52 (d, *J* = 8.2 Hz, 1H), 4.48 (d, *J* = 7.9 Hz, 1H), 4.46 (d, *J* = 8.0 Hz, 1H), 4.16 (d, *J* = 2.9 Hz, 1H), 4.09 (s, 2H), 4.01 (dd, *J* = 2.8, 10.6 Hz, 1H), 3.98-3.94 (m, 2H), 3.93-3.86 (m, 4H), 3.80-3.59 (m, 14H), 3.58-3.51 (m, 3H), 3.46 (s, 3H), 3.32-3.25 (m, 3H), 2.95 (dd, *J* = 8.4, 10.2 Hz, 1H), 2.69 (dd, *J* = 4.3, 12.0 Hz, 1H), 1.72 (t, *J* = 12.0 Hz, 1H), 1.65-1.55 (m, 4H), 1.42-1.32 (m, 4H); <sup>13</sup>C NMR (125 MHz, D<sub>2</sub>O) δ 176.73, 174.55, 106.33, 103.58, 103.00, 100.94, 83.20, 80.92, 79.36, 76.17, 75.96, 75.92, 75.70, 75.43, 73.80, 73.26, 71.50, 71.14, 69.36, 68.81, 68.07, 67.43, 62.07, 61.96(x2), 61.06, 60.15, 58.42, 52.75, 52.64, 52.09, 41.08, 29.54, 28.84, 26.62, 25.56; HRMS (ESI) *m/z* calcd for C<sub>36</sub>H<sub>63</sub>N<sub>5</sub>O<sub>24</sub>Na [M+Na]<sup>+</sup> 972.3755, found 972.3723.

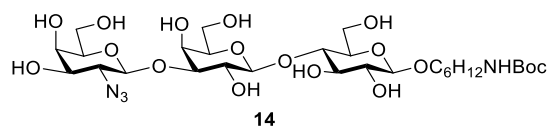

**GalAzβ1,3-Galβ1,4-GlcβC<sub>6</sub>H<sub>12</sub>NHBoc (14).** Compound **2a** (121.0 mg, 223.4 μmol) and GalNTFA (123.0 mg, 446.8 μmol) were used as acceptor and donor, respectively, by following the general enzymatic synthetic procedure 2. After being shaken for 36 h, the reaction was quenched and purified by following general purification procedure 3. The fractions with crude product were lyophilized by following the general procedure for deprotection of NHTFA group. The resulting residue was performed by diazo transfer reaction. 1*H*-Imidazole-1-sulfonyl azide hydrochloride<sup>14</sup> (274.9 mg, 1.1 mmol) was added to a solution containing the crude product (223.4 μmol, 10 mM), NaHCO<sub>3</sub> (112.6 mg, 1.3 mmol), and CuSO<sub>4</sub>·5H<sub>2</sub>O (5.6 mg, 22.3 μmol) in H<sub>2</sub>O and MeOH (1/1, v/v, 22.3 mL). The mixture was stirred at rt for 5 h and the progress of the reaction was monitored by TLC analysis (*n*-PrOH/ H<sub>2</sub>O/ AcOH = 6/2/1 (v/v/v)). The mixtures were concentrated and purified by a C18 reverse-phase silica column (Sep-Pak Vac C18 cartridge 10 g, 55-105 μm, Waters) using a gradient solution of 0-100% MeOH in H<sub>2</sub>O as eluent. After concentration of the fractions containing product, the resulting residue was further purified by size-exclusion column using H<sub>2</sub>O as eluent (BioGel P2 gel packed in a column 1.6 cm x 50 cm, Biorad). The fractions with product were lyophilized to give compound **14** in 90.3% yield (147.0 mg).  $R_f = 0.74$  (*n*-PrOH/ H<sub>2</sub>O/ AcOH = 6/2/1 (v/v/v)); <sup>1</sup>H NMR (500 MHz, D<sub>2</sub>O) δ 4.69 (d, *J* = 7.8 Hz, 1H), 4.47 (d, *J* = 8.0 Hz, 1H), 4.45 (d, *J* = 7.8 Hz, 1H), 4.16 (d, *J* = 2.8 Hz, 1H), 3.97 (d, *J* = 11.5 Hz, 1H), 3.93-3.87 (m, 2H), 3.85 (dd, *J* = 3.0, 10.0 Hz, 1H), 3.81-3.69 (m, 7H), 3.68-3.51 (m, 7H), 3.28 (t, *J* = 8.4 Hz, 1H), 3.04 (t, *J* = 6.6 Hz, 2H), 1.66-1.58 (m, 2H), 1.49-1.43 (m, 2H), 1.43-1.29 (m, 13H); <sup>13</sup>C NMR (125 MHz, D<sub>2</sub>O) δ

159.36, 104.49, 103.99, 103.07, 82.63, 81.63, 79.38, 76.10, 75.95, 75.79, 75.48, 73.84, 72.18, 71.55, 71.19, 69.40, 68.84, 64.44, 61.96, 61.90, 61.05, 40.88, 29.79, 29.65, 28.68, 26.61, 25.69; HRMS (ESI)  $m/z$  calcd for  $C_{29}H_{52}N_4O_{17}Na [M+Na]^+$  751.3220, found 751.3234.

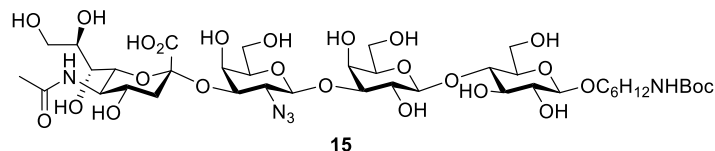

**Neu5Ac $\alpha$ 2,3-GalAz $\beta$ 1,3-Gal $\beta$ 1,4-Glc $\beta$ C<sub>6</sub>H<sub>12</sub>NHBoc (15).** Compound **14** (7.4 mg, 10.2  $\mu$ mol) and Neu5Ac (9.4 mg, 30.5  $\mu$ mol) were used as acceptor and donor, respectively. The experimental procedure is similar as described in the synthesis of compound **5** by PmST1. After purification, the product was lyophilized to give compound **15** in 98.5% yield (10.2 mg).  $R_f = 0.54$  ( $n$ -PrOH/ H<sub>2</sub>O/ AcOH = 6/2/1 (v/v/v)); <sup>1</sup>H NMR (500 MHz, D<sub>2</sub>O)  $\delta$  4.65 (d,  $J = 8.2$  Hz, 1H), 4.46 (d,  $J = 7.9$  Hz, 2H), 4.19-4.11 (m, 2H), 4.00-3.76 (m, 9H), 3.75-3.55 (m, 14H), 3.52 (dd,  $J = 1.6, 10.5$  Hz, 1H), 3.28 (t,  $J = 8.4$  Hz, 1H), 3.05 (t,  $J = 6.6$  Hz, 2H), 2.77 (dd,  $J = 4.5, 12.1$  Hz, 1H), 2.02 (s, 3H), 1.80 (t,  $J = 12.1$  Hz, 1H), 1.66-1.58 (m, 2H), 1.50-1.28 (m, 6H), 1.41 (s, 9H); <sup>13</sup>C NMR (125 MHz, D<sub>2</sub>O)  $\delta$  176.08, 174.70, 159.26, 103.81, 103.68, 102.97, 100.63, 82.59, 81.69, 79.49, 75.87, 75.75, 75.69, 75.41, 74.88, 73.78, 73.74, 72.75, 71.48, 71.07, 69.28(x2), 69.15, 67.66, 63.52, 62.67, 61.87(x2), 61.07, 52.61, 40.89, 40.36, 29.69, 29.55, 28.64, 26.49, 25.58, 22.94; HRMS (ESI)  $m/z$  calcd for  $C_{40}H_{68}N_5O_{25} [M-H]^-$  1018.4203, found 1018.4229.

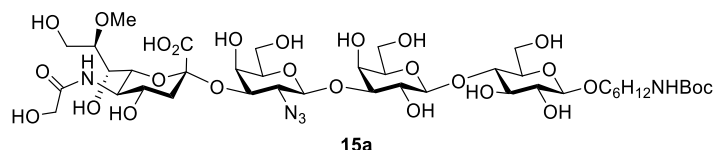

**Neu5Gc8Me $\alpha$ 2,3-GalAz $\beta$ 1,3-Gal $\beta$ 1,4-Glc $\beta$ C<sub>6</sub>H<sub>12</sub>NHBoc (15a).** Compound **14** (47.5 mg, 65.2  $\mu$ mol) and Neu5Gc8Me (66.37 mg, 196  $\mu$ mol) were used as acceptor and donor, respectively. The experimental procedure is similar as described in the synthesis of compound **15**. The fractions with product were lyophilized to give compound **15a** in 35.5% yield (24.3 mg).  $R_f = 0.49$  ( $n$ -PrOH/ H<sub>2</sub>O/ AcOH = 6/2/1 (v/v/v)); <sup>1</sup>H NMR (500 MHz, D<sub>2</sub>O)  $\delta$  4.70 (d,  $J = 8.2$  Hz, 1H), 4.50 (d,  $J = 7.9$  Hz, 2H), 4.19-4.16 (m, 2H), 4.15 (s, 2H), 4.06 (dd,  $J = 2.4, 12.5$  Hz, 1H), 4.03-3.98 (m, 2H), 3.98-3.81 (m, 7H), 3.81-3.71 (m, 7H), 3.70-3.65 (m, 4H), 3.65-3.60 (m, 2H), 3.59-3.54 (m, 1H), 3.49 (s, 3H), 3.32 (t,  $J = 7.7$  Hz, 1H), 3.08 (t,  $J = 6.7$  Hz, 2H), 2.73 (dd,  $J = 4.2, 12.2$  Hz, 1H), 1.84 (t,  $J = 12.2$  Hz, 1H), 1.70-1.61 (m, 2H), 1.54-1.31 (m, 6H), 1.45 (s, 9H); <sup>13</sup>C NMR (125 MHz, D<sub>2</sub>O)  $\delta$  176.82, 174.63, 159.37, 104.14, 103.89, 103.00, 101.30, 82.53, 81.72, 81.52, 79.40, 75.93, 75.75(x2), 75.44, 74.50, 73.80, 73.39, 71.56, 71.16, 69.36, 68.85, 68.26, 68.06, 62.84, 61.94, 61.89, 61.04, 60.38, 58.29, 52.73, 40.88, 40.19, 29.72, 29.59, 28.65, 26.54, 25.63; HRMS (ESI)  $m/z$  calcd for  $C_{41}H_{70}N_5O_{26} [M-H]^-$  1048.4309, found 1048.4278.

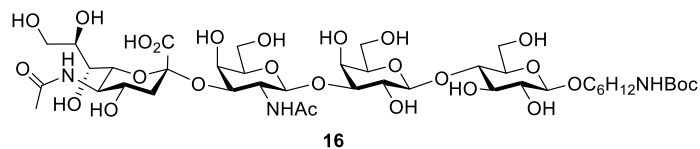

**Neu5Ac $\alpha$ 2,3-GalNAc $\beta$ 1,3-Gal $\beta$ 1,4-Glc $\beta$ C<sub>6</sub>H<sub>12</sub>NHBoc (16).** To a solution of compound **15** (10.2 mg, 10.0  $\mu$ mol) in THF (0.8 mL) was added 2 N NaOH<sub>(aq)</sub> (50.0  $\mu$ l, 100.0  $\mu$ mol) and 1.0 M PMe<sub>3</sub> in THF (80.0  $\mu$ l, 80.0  $\mu$ mol). The reaction mixture was stirred at rt until TLC analysis (*n*-PrOH/ H<sub>2</sub>O/ AcOH = 6: 2: 1 (v/ v/ v)) indicated the completion of the reaction after 4 h, the resultant was neutralized with AcOH. After removal of solvent under vacuum, the crude product was purified by size-exclusion column using H<sub>2</sub>O as eluent (BioGel P2 gel packed in a column 1.6 cm x 50 cm, Biorad). The glycan fractions were acetylated by following the general *N*-acetylation procedure. Fractions containing the desired product were pooled and lyophilized to give compound **16** in 98.5% (10.2 mg).  $R_f$  = 0.50 (*n*-PrOH/ H<sub>2</sub>O/ AcOH = 6/2/1 (v/v/v)); <sup>1</sup>H NMR (500 MHz, D<sub>2</sub>O)  $\delta$  4.71 (d,  $J$  = 8.5 Hz, 1H), 4.45 (d,  $J$  = 8.1 Hz, 1H), 4.43 (d,  $J$  = 8.0 Hz, 1H), 4.17 (dd,  $J$  = 2.1, 11.0 Hz, 1H), 4.13 (d,  $J$  = 2.5 Hz, 1H), 3.98-3.83 (m, 6H), 3.80-3.68 (m, 9H), 3.67-3.55 (m, 8H), 3.45 (d,  $J$  = 10.3 Hz, 1H), 3.27 (t,  $J$  = 8.0 Hz, 1H), 3.04 (t,  $J$  = 6.6 Hz, 2H), 2.67 (dd,  $J$  = 4.5, 12.4 Hz, 1H), 2.06 (s, 3H), 2.01 (s, 3H), 1.66-1.56 (m, 3H), 1.50-1.27 (m, 6H), 1.40 (s, 9H); <sup>13</sup>C NMR (125 MHz, D<sub>2</sub>O)  $\delta$  176.17, 175.93, 175.11, 159.37, 103.87, 103.78, 102.99, 100.48, 82.76, 81.73, 79.37, 75.86, 75.72(x2), 75.42, 73.78(x2), 73.76, 72.65, 71.56, 70.96, 69.38, 69.30, 69.00, 67.94, 63.55, 61.97, 61.94, 61.04, 52.83, 52.11, 40.88, 40.64, 29.73, 29.60, 28.66, 26.55, 25.64, 23.37, 22.95; HRMS (ESI)  $m/z$  calcd for C<sub>42</sub>H<sub>72</sub>N<sub>3</sub>O<sub>26</sub> [M-H]<sup>-</sup> 1034.4410, found 1034.4382.

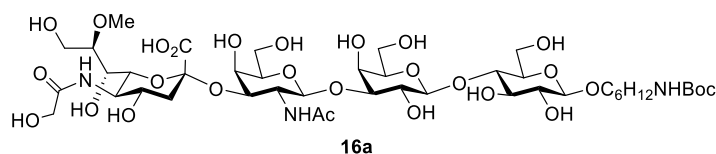

**Neu5Gc8Me $\alpha$ 2,3-GalNAc $\beta$ 1,3-Gal $\beta$ 1,4-Glc $\beta$ C<sub>6</sub>H<sub>12</sub>NHBoc (16a).** Compound **15a** (13.5 mg, 12.9  $\mu$ mol) was used by following the procedures as described in the synthesis of compound **16**. After purification, the product was lyophilized to give compound **16a** in 94.8% (13.0 mg).  $R_f$  = 0.39 (*n*-PrOH/ H<sub>2</sub>O/ AcOH = 6/2/1 (v/v/v)); <sup>1</sup>H NMR (500 MHz, D<sub>2</sub>O)  $\delta$  4.68 (d,  $J$  = 8.5 Hz, 1H), 4.46 (d,  $J$  = 8.0 Hz, 1H), 4.43 (d,  $J$  = 7.9 Hz, 1H), 4.23 (dd,  $J$  = 2.5, 11.0 Hz, 1H), 4.14 (d,  $J$  = 2.7 Hz, 1H), 4.11 (s, 2H), 4.02-3.83 (m, 7H), 3.82-3.65 (m, 11H), 3.64-3.55 (m, 5H), 3.53-3.49 (m, 1H), 3.45 (s, 3H), 3.28 (t,  $J$  = 8.4 Hz, 1H), 3.04 (t,  $J$  = 6.7 Hz, 2H), 2.58 (dd,  $J$  = 4.4, 12.0 Hz, 1H), 2.06 (s, 3H), 1.67-1.57 (m, 3H), 1.50-1.28 (m, 6H), 1.41 (s, 9H); <sup>13</sup>C NMR (125 MHz, D<sub>2</sub>O)  $\delta$  176.81, 175.97, 174.84, 159.38, 104.07, 103.91, 102.99, 101.00, 82.69, 81.71, 81.13, 79.38, 75.86, 75.72, 75.67, 75.43, 73.78, 73.33, 73.18, 71.56, 71.01, 69.44, 68.96, 68.22, 67.96, 61.98, 61.95(x2), 61.05, 60.08, 58.28, 52.88, 52.14, 40.87, 40.48, 29.73, 29.60, 28.66, 26.55, 25.64, 23.30; HRMS (ESI)  $m/z$  calcd for C<sub>43</sub>H<sub>74</sub>N<sub>3</sub>O<sub>27</sub> [M-H]<sup>-</sup> 1064.4515, found 1064.4482.

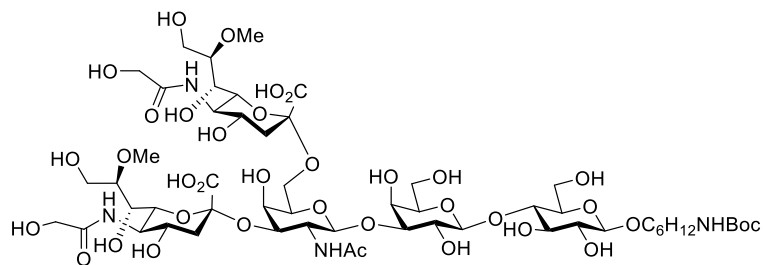

17

**Neu5Gc8Mea2,3(Neu5Gc8Mea2,6)-GalNAc $\beta$ 1,3-Gal $\beta$ 1,4-Glc $\beta$ C<sub>6</sub>H<sub>12</sub>NHBoc** (17, GAA7-C<sub>6</sub>H<sub>12</sub>NHBoc). Compound **16a** (3.6 mg, 3.4  $\mu$ mol) and Neu5Gc8Me (3.4 mg, 10.1  $\mu$ mol) were used as acceptor and donor, respectively. The experimental procedure is similar as described in the synthesis of compound **1** by Psp2,6ST. After purification, the product was lyophilized to give compound **17** in 74.7% yield (3.5 mg).  $R_f = 0.22$  (*n*-PrOH/ H<sub>2</sub>O/ AcOH = 6/2/1 (v/v/v)); <sup>1</sup>H NMR (500 MHz, D<sub>2</sub>O)  $\delta$  4.67 (d,  $J = 8.5$  Hz, 1H), 4.47 (d,  $J = 8.0$  Hz, 1H), 4.42 (d,  $J = 7.9$  Hz, 1H), 4.23 (dd,  $J = 2.3, 10.8$  Hz, 1H), 4.17 (d,  $J = 2.7$  Hz, 1H), 4.113 (s, 2H), 4.108 (s, 2H), 4.11-4.09 (m, 1H), 4.03-3.56 (m, 27H), 3.56-3.51 (m, 3H), 3.49 (s, 3H), 3.46 (s, 3H), 3.31 (t,  $J = 8.4$  Hz, 1H), 3.05 (t,  $J = 6.7$  Hz, 2H), 2.63-2.56 (m, 2H), 2.06 (s, 3H), 1.69 (t,  $J = 12.3$  Hz, 1H), 1.67-1.61 (m, 3H), 1.50-1.32 (m, 6H), 1.42 (s, 9H); <sup>13</sup>C NMR (125 MHz, D<sub>2</sub>O)  $\delta$  176.79, 176.64, 175.94, 174.84, 174.65, 159.41, 104.21, 104.15, 102.86, 101.54, 101.01, 82.93, 81.75, 81.34, 81.07, 80.75, 75.74, 75.67, 75.59, 74.36, 73.70, 73.39, 73.24, 73.16, 71.52, 70.71, 69.31, 68.98, 68.71, 68.38, 68.23, 67.97, 64.50, 61.96(x2), 61.24, 60.65, 60.04, 58.66, 58.27, 52.87, 52.76, 52.13, 41.23, 40.87, 40.47, 29.71, 29.59, 28.65, 26.55, 25.64, 23.30; HRMS (ESI)  $m/z$  calcd for C<sub>55</sub>H<sub>93</sub>N<sub>4</sub>O<sub>36</sub> [M-H]<sup>-</sup> 1385.5575, found 1385.5581.

## Reference

1. W.-T. Chien, C.-F. Liang, C.-C. Yu, C.-H. Lin, S.-P. Li, I. Primadona, Y.-J. Chen, K.-K. Mong and C.-C. Lin, *Chem. Commun.*, 2014, **50**, 5786-5789.
2. W. Guan, L. Cai, J. Fang, B. Wu and P. G. Wang, *Chem. Commun.*, 2009, **45**, 6976-6978.
3. W. Guan, L. Cai and P. G. Wang, *Chem. Eur. J.*, 2010, **16**, 13343-13345.
4. O. Blixt, I. van Die, T. Norberg and D. H. van den Eijnden, *Glycobiology*, 1999, **9**, 1061-1071.
5. C.-C. Yu, P.-C. Lin and C.-C. Lin, *Chem. Commun.*, 2008, **11**, 1308-1310.
6. C.-C. Yu, Y.-Y. Kuo, C.-F. Liang, W.-T. Chien, H.-T. Wu, T.-C. Chang, F.-D. Jan and C.-C. Lin, *Bioconjugate Chem.*, 2012, **23**, 714-724.
7. C. P. Chiu, L. L. Lairson, M. Gilbert, W. W. Wakarchuk, S. G. Withers and N. C. J. Strynadka, *Biochemistry*, 2007, **46**, 7196-7204.
8. P.-J. Li, S.-Y. Huang, P.-Y. Chiang, C.-Y. Fan, L.-J. Guo, D.-Y. Wu, T. Angata and C.-C. Lin, *Angew. Chem., Int. Ed.*, 2019, **58**, 11273-11278.
9. V. Thon, Y. Li, H. Yu, K. Lau and X. Chen, *Appl. Microbiol. Biotechnol.*, 2012, **94**, 977-985.
10. S.-P. Li, W.-C. Hsiao, C.-C. Yu, W.-T. Chien, H.-J. Lin, L.-D. Huang, C.-H. Lin, W.-L. Wu, S.-H. Wu and C.-C. Lin, *Adv. Synth. Catal.*, 2014, **356**, 3199-3213.
11. K. Suzuki, S. Daikoku, T. Ako, Y. Shioiri, A. Kurimoto, A. Ohtake, S. K. Sarkar and O. Kanie, *Anal. Chem.*, 2007, **79**, 9022-9029.
12. H. Yu, H. Z. Cao, V. K. Tiwari, Y. H. Li and X. Chen, *Bioorg. Med. Chem. Lett.*, 2011, **21**, 5037-5040.
13. L. Wen, M. R. Gadi, Y. Zheng, C. Gibbons, S. M. Kondengaden, J. Zhang and P. G. Wang, *ACS Catal.*, 2018, **8**, 7659-7666.
14. E. D. Goddard-Borger and R. V. Stick, *Org. Lett.*, 2007, **9**, 3797-3800.

# NMR Spectra

4.7896  
4.6651  
4.6709  
4.4894  
4.4760  
4.4334  
4.4202  
4.2493  
4.2444  
4.2309  
4.2260  
4.1822  
4.1768  
4.1188  
4.1137  
4.1069  
4.0979  
4.0204  
4.0155  
4.0034  
3.9995  
3.9948  
3.9872  
3.9711  
3.9665  
3.9568  
3.9496  
3.9443  
3.9385  
3.9325  
3.9278  
3.9164  
3.9110  
3.9049  
3.8942  
3.8773  
3.8704  
3.8633  
3.8521  
3.8444  
3.8379  
3.8308  
3.8230  
3.7929  
3.7869  
3.7738  
3.7665  
3.7570  
3.7447  
3.7384  
3.7320  
3.7246  
3.7160  
3.7119  
3.7056  
3.6992  
3.6943  
3.6853  
3.6780  
3.6659  
3.6461  
3.6405  
3.6309  
3.6172  
3.6044  
3.5991  
3.5908  
3.5881  
3.5741  
3.5570  
3.5429  
3.5363  
3.5316  
3.5259  
3.5203  
3.5120  
3.5074  
3.4982  
3.4906  
3.4781  
3.4667  
3.3359  
3.3291  
3.3245  
3.3132  
3.3008  
2.6245  
2.6172  
2.6036  
2.5955  
2.5819  
2.0685  
1.7172  
1.6969  
1.6766  
1.6660  
1.6562  
1.6454  
1.6328  
1.6274  
1.6200  
1.6160  
1.6081  
1.6043  
1.4112  
1.4048  
1.3992  
1.3932  
1.3873

THK-GAA7-N3

Current Data Parameters  
NAME 190524  
EXPNO 1  
PROCNO 1

F2 - Acquisition Parameters  
Date\_ 20190525  
Time 5.26  
INSTRUM spect  
PROBHD 5 mm QNP 1H/1  
PULPROG zgpg30  
TD 32768  
SOLVENT H2O+D2O  
NS 128  
DS 0  
SWH 9541.984 Hz  
FIDRES 0.291198 Hz  
AQ 1.7170432 sec  
RG 128  
DW 52.400 usec  
DE 6.50 usec  
TE 297.1 K  
D1 2.00000000 sec  
MCREST 0 sec  
MCWRK 0.01500000 sec

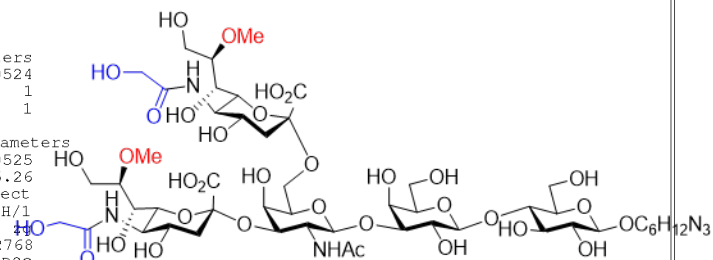

===== CHANNEL f1 =====  
NUC1 1H  
P1 10.20 usec  
PL1 -1.00 dB  
SFO1 598.2028175 MHz

F2 - Processing parameters  
SI 32768  
SF 598.1999454 MHz  
WDW no  
SSB 0  
LB 0 Hz  
GB 0  
PC 2.00

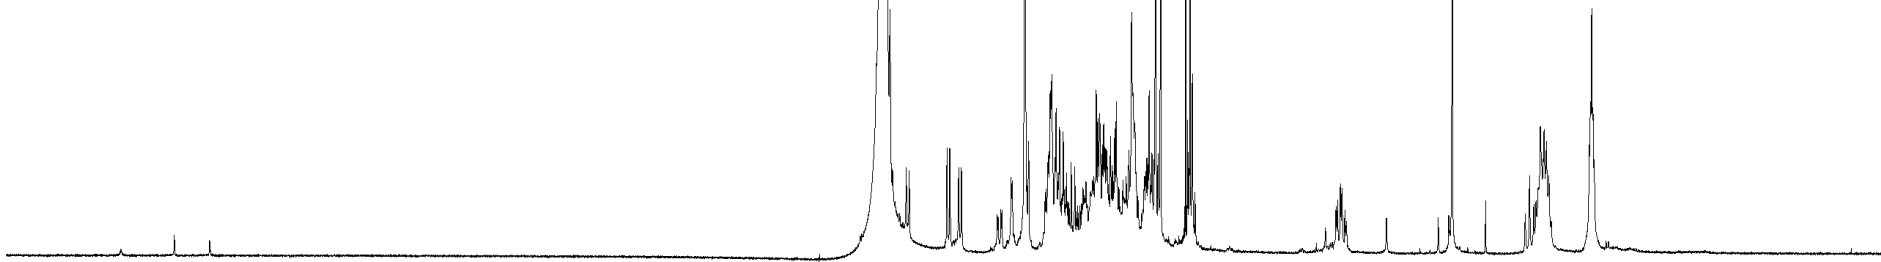

1.03  
1.02  
1.00  
1.06  
5.10  
3.92  
2.97  
1.90  
2.81  
4.01  
3.00  
2.01  
3.09  
2.00  
2.28  
2.48  
3.07  
2.90  
3.13  
2.01  
2.74  
6.45  
4.43

<sup>1</sup>H NMR spectrum of Compound 1 (600 MHz D<sub>2</sub>O)

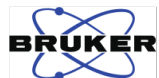

THK-GAA-7-N3

Current Data Parameters  
NAME 190524  
EXPNO 2  
PROCNO 1

F2 - Acquisition Parameters  
Date\_ 20190525  
Time 15.20  
INSTRUM spect  
PROBHD 5 mm QNP 1H/1  
PULPROG zgpg  
TD 32768  
SOLVENT H2O+D2O  
NS 17801  
DS 0  
SWH 45045.047 Hz  
FIDRES 1.374666 Hz  
AQ 0.3637248 sec  
RG 4096  
DW 11.100 usec  
DE 6.50 usec  
TE 297.3 K  
D1 3.5000000 sec  
d11 0.0300000 sec  
DELTA 3.4000010 sec  
MCKEST 0 sec  
MCWRK 0.0150000 sec

===== CHANNEL f1 =====  
NUC1 13C  
P1 6.20 usec  
PL1 0 dB  
SFO1 150.4340559 MHz  
===== CHANNEL f2 =====  
CPDPRG2 waltz16  
NUC2 1H  
PCPD2 92.00 usec  
PL2 120.00 dB  
PL12 12.00 dB  
PL13 15.00 dB  
SFO2 598.2029910 MHz

F2 - Processing parameters  
SI 65536  
SF 150.4173639 MHz  
WDW EM  
SSB 0  
LB 3.00 Hz  
GB 0  
FC 1.00

176.774  
176.627  
175.921  
174.816  
174.625

104.183  
104.126  
102.850  
101.541  
100.999  
82.906  
81.349  
81.093  
80.747  
75.725  
75.663  
75.582  
74.350  
73.702  
73.240  
73.168  
71.454  
70.711  
69.300  
68.965  
68.704  
68.386  
68.239  
67.980  
64.476  
61.959  
61.250  
60.664  
60.076  
58.648  
58.271  
52.868  
52.765  
52.098  
49.431  
49.287  
49.143  
48.939  
48.855  
48.710  
48.564  
41.217  
40.476  
29.535  
28.829  
26.617  
25.564  
23.300

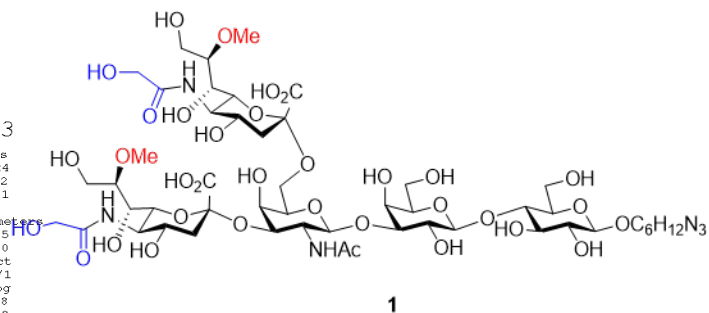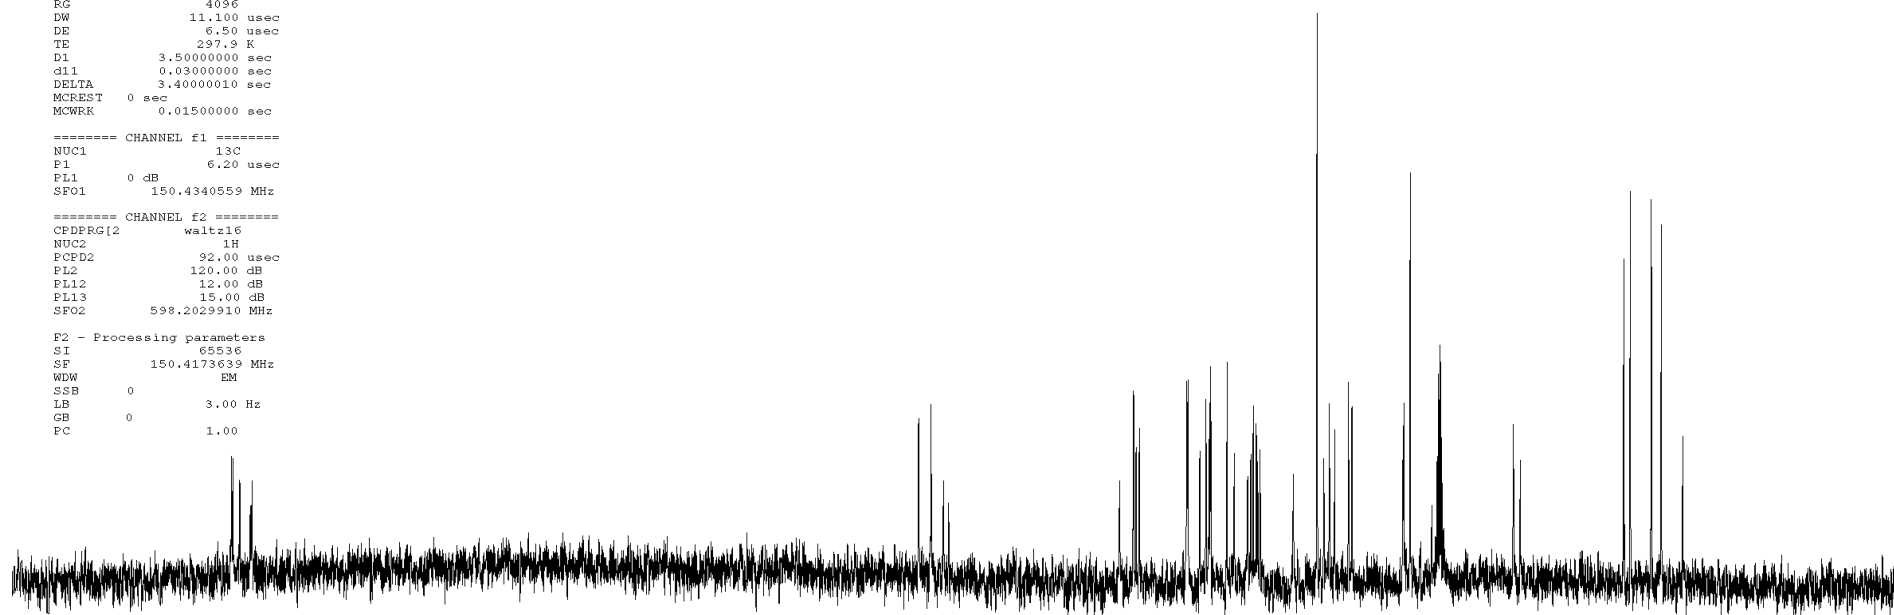

<sup>13</sup>C NMR spectrum of Compound 1 (150 MHz D<sub>2</sub>O)

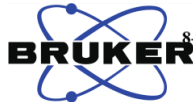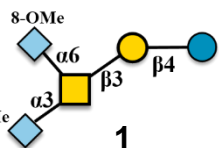

THK-GAA-7-N3

Current Data Parameters  
NAME 190524  
EXPNO 11  
PROCNO 1

F2 - Acquisition Parameters  
Date\_ 20190524  
Time 13.03  
INSTRUM spect  
PROBHD 5 mm QNP 1H/1  
PULPROG cosyqf  
TD 2048  
SOLVENT MeOD  
NS 8  
DS 0  
SWH 6009.615 Hz  
FIDRES 2.934382 Hz  
AQ 0.1703936 sec  
RG 128  
DW 83.200 usec  
DE 6.50 usec  
TE 297.6 K  
d0 0.00000300 sec  
D1 1.50000000 sec  
IN0 0.00016640 sec  
MCREST 0 sec  
MCWRR 1.50000000 sec

==== CHANNEL f1 =====  
NUC1 1H  
P0 14.00 usec  
P1 10.30 usec  
PL1 -1.00 dB  
SFO1 598.2028080 MHz

F1 - Acquisition parameters  
TD 360  
SFO1 598.2028 MHz  
FIDRES 33.386753 Hz  
SW 10.046 ppm  
FhMODE QF

F2 - Processing parameters  
SI 2048  
SF 598.1999440 MHz  
WDW QSINE  
SSB 0  
LB 0 Hz  
GB 0  
PC 1.00

F1 - Processing parameters  
SI 512  
MC2 QF  
SF 598.1999520 MHz  
WDW QSINE  
SSB 0  
LB 0 Hz  
GB 0

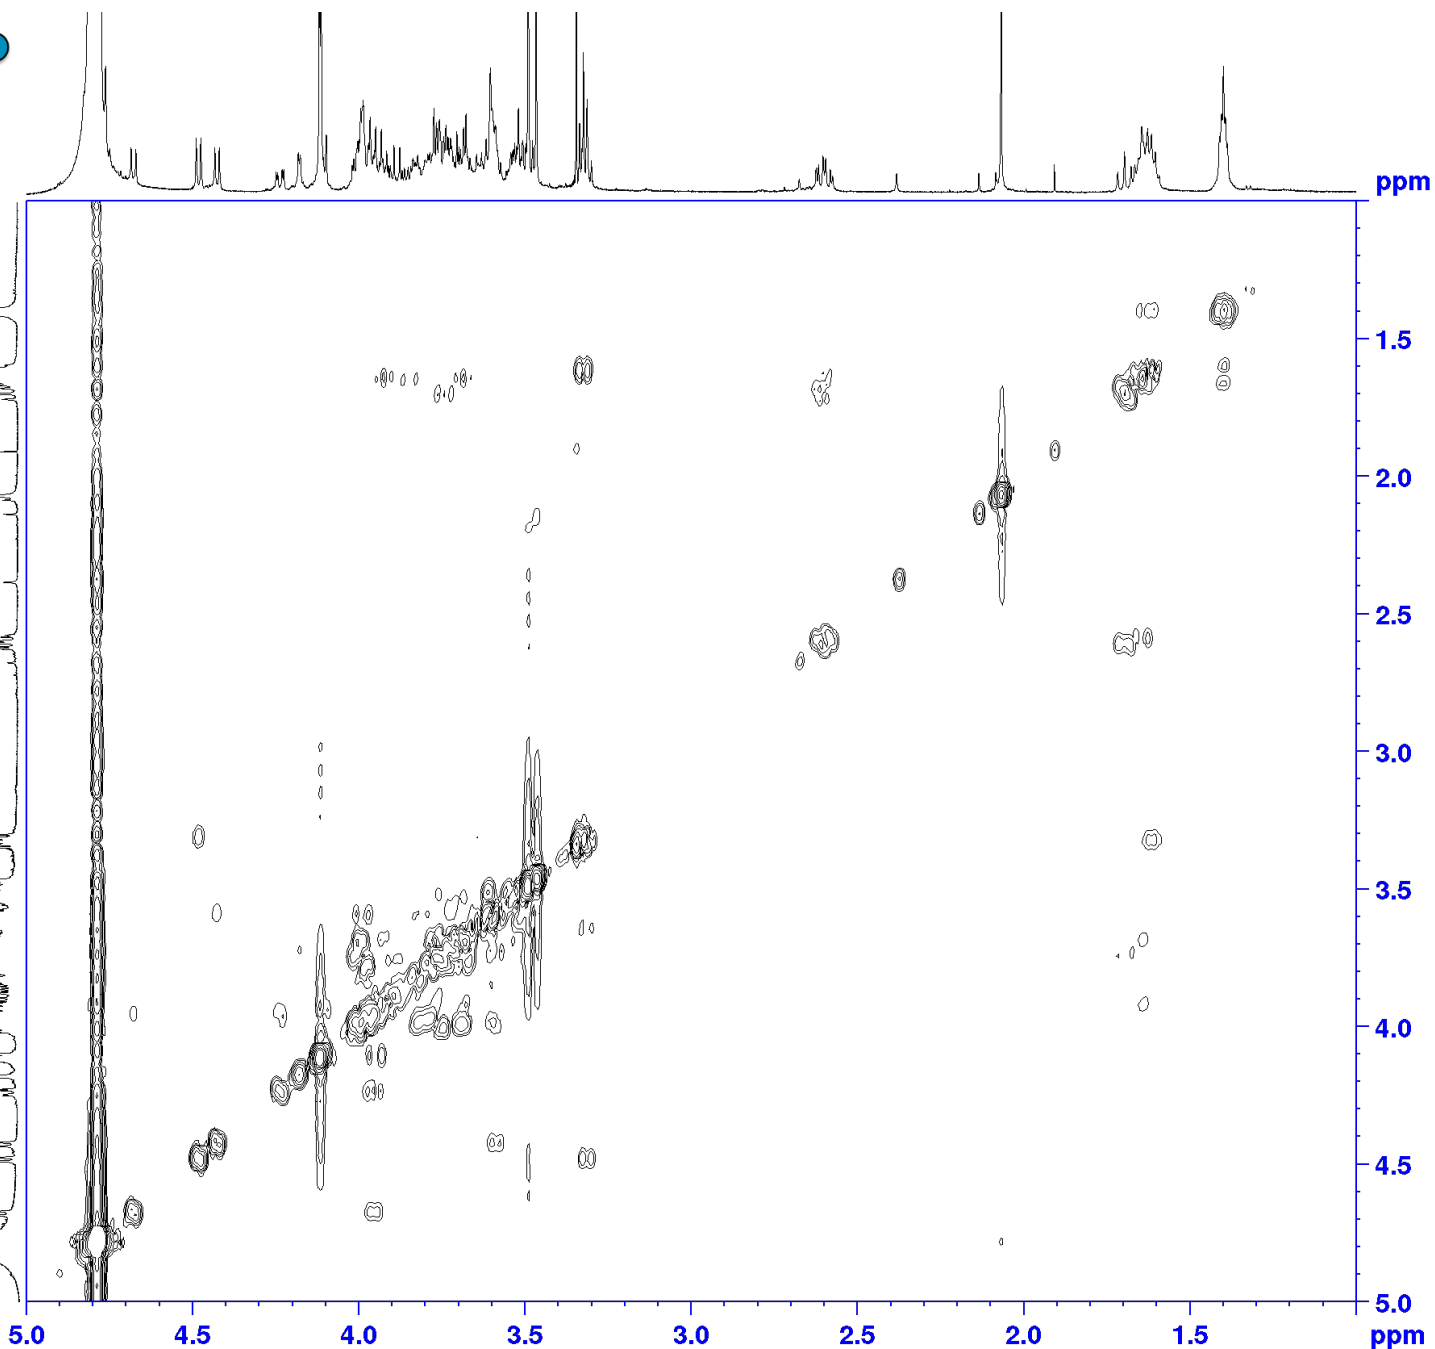

$^1\text{H}$ - $^1\text{H}$  COSY NMR spectrum of Compound 1 (600 MHz  $\text{D}_2\text{O}$ )



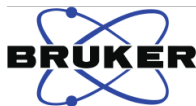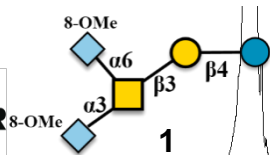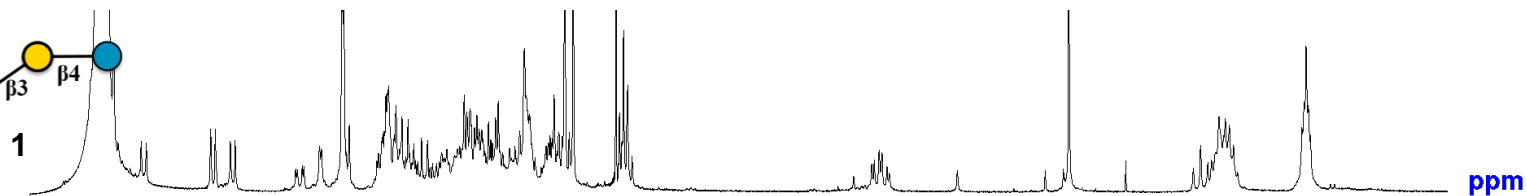

THK-GAA-7-N3

```
Current Data Parameters
NAME      190524
EXPNO     12
PROCNO    1

E2 - Acquisition Parameters
Date_     20190524
Time      14.25
INSTRUM   spect
PROBHD    5 mm QNP 1H/1
FILEPROG  hsqcpgpgai
ID        2048
SOLVENT   H2O+D2O
NS        32
DS         8
SWH       6009.615 Hz
FIDRES    2.924382 Hz
AQ        0.1703956 sec
RG         32768
DW        83.200 usec
DE         6.50 usec
TE        297.3 K
CNST2     145.0000000
d0         0.00000300 sec
d1         1.20000005 sec
d4         0.00172414 sec
d11        0.03000000 sec
d13        0.00000400 sec
d16        0.00050000 sec
d24        0.00089000 sec
DELTA     0.00157660 sec
DELTA1    0.00150800 sec
INO        0.00001279 sec
MORPH     0 sec
MORPH1    0.20000041 sec
STLONT    0

----- CHANNEL f1 -----
NUC1      1H
P1        10.30 usec
p2        20.60 usec
P28       1000.00 usec
FL1       -1.00 dB
SFO1      598.2028175 MHz

----- CHANNEL f2 -----
CPDPRG2   gexp
NUC2      13C
P3        10.00 usec
p4        20.00 usec
POPD2     70.00 usec
FL2       0 dB
FL12      20.00 dB
SFO2      150.4287913 MHz

----- GRADIENT CHANNEL -----
GFNAM[1]  SINE.100
GFNAM[2]  SINE.100
GEK1      0 %
GEK2      0 %
GEV1      0 %
GEV2      0 %
GEZ1      80.00 %
GEZ2      20.10 %
P16       1000.00 usec

F1 - Acquisition parameters
ID        400
SFO1      150.4288 MHz
FIDRES    195.503418 Hz
SW        259.928 ppm
FMODE     Echo-Antiecho

E2 - Processing parameters
SI        2048
SF        598.1999600 MHz
WDW       QSINE
SSB       4
LB        0 Hz
GB        0
PC        1.00

F1 - Processing parameters
SI        512
MC2       echo-antiecho
SF        150.4173639 MHz
WDW       QSINE
SSB       4
LB        0 Hz
GB        0
```

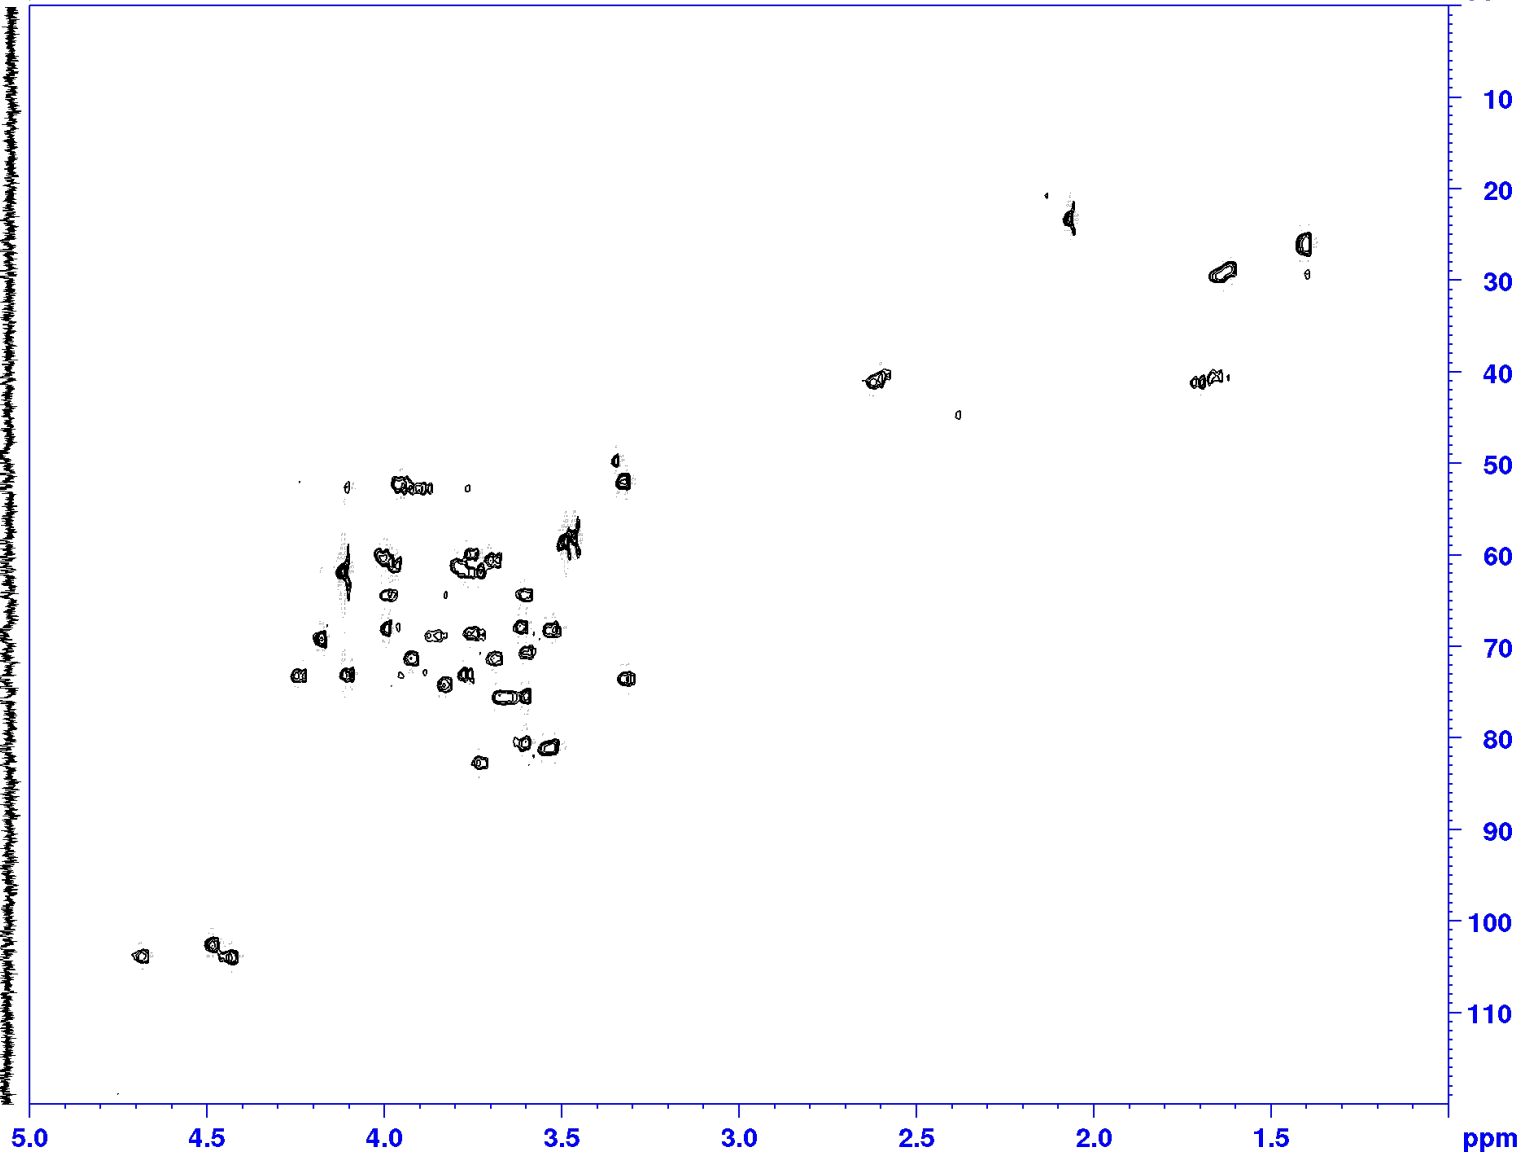

$^1\text{H}$ - $^{13}\text{C}$  HSQC NMR spectrum of Compound 1 (600 MHz/150 MHz  $\text{D}_2\text{O}$ )

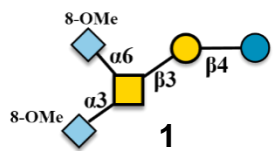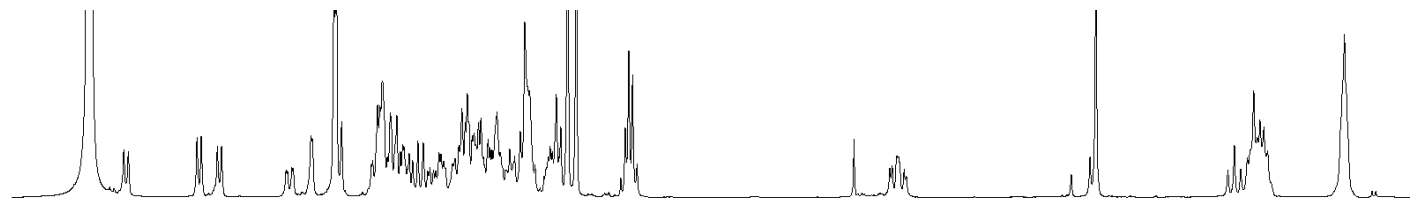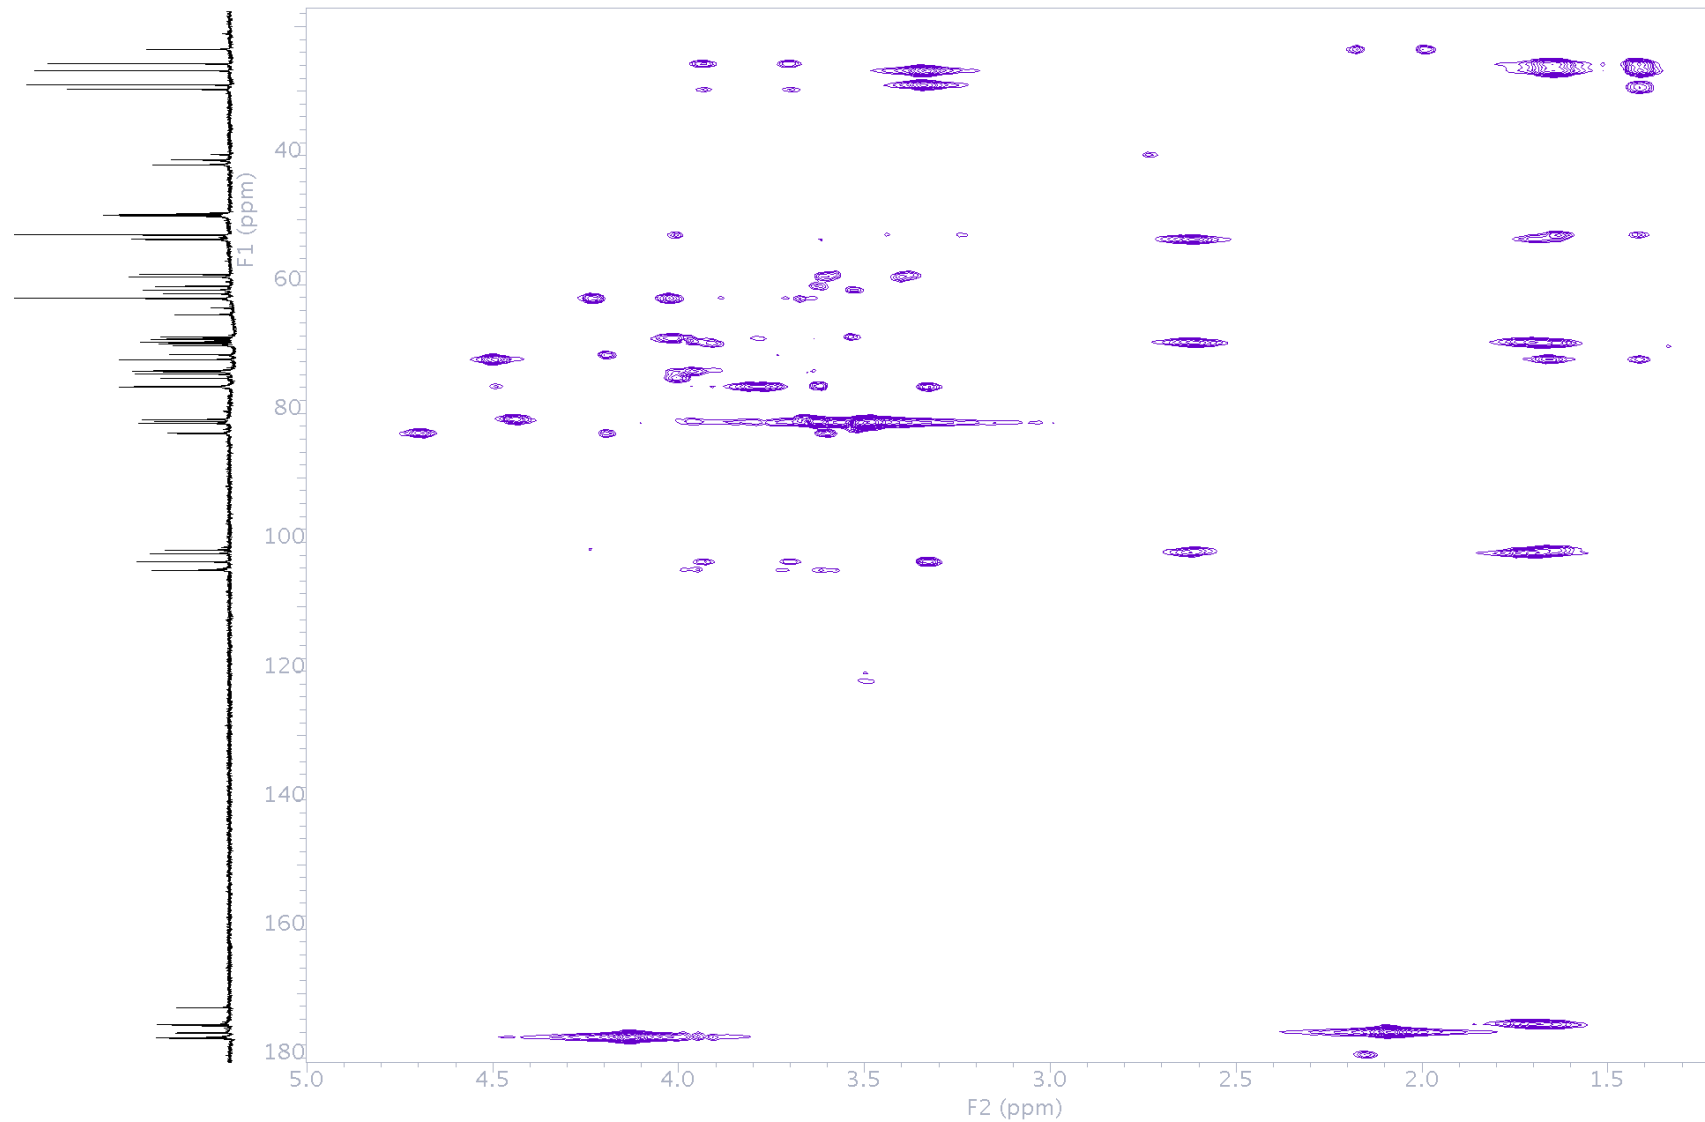

$^1\text{H}$ - $^{13}\text{C}$  HMBC NMR spectrum of Compound **1** (700 MHz/175 MHz  $\text{D}_2\text{O}$ )

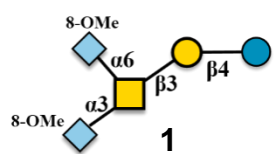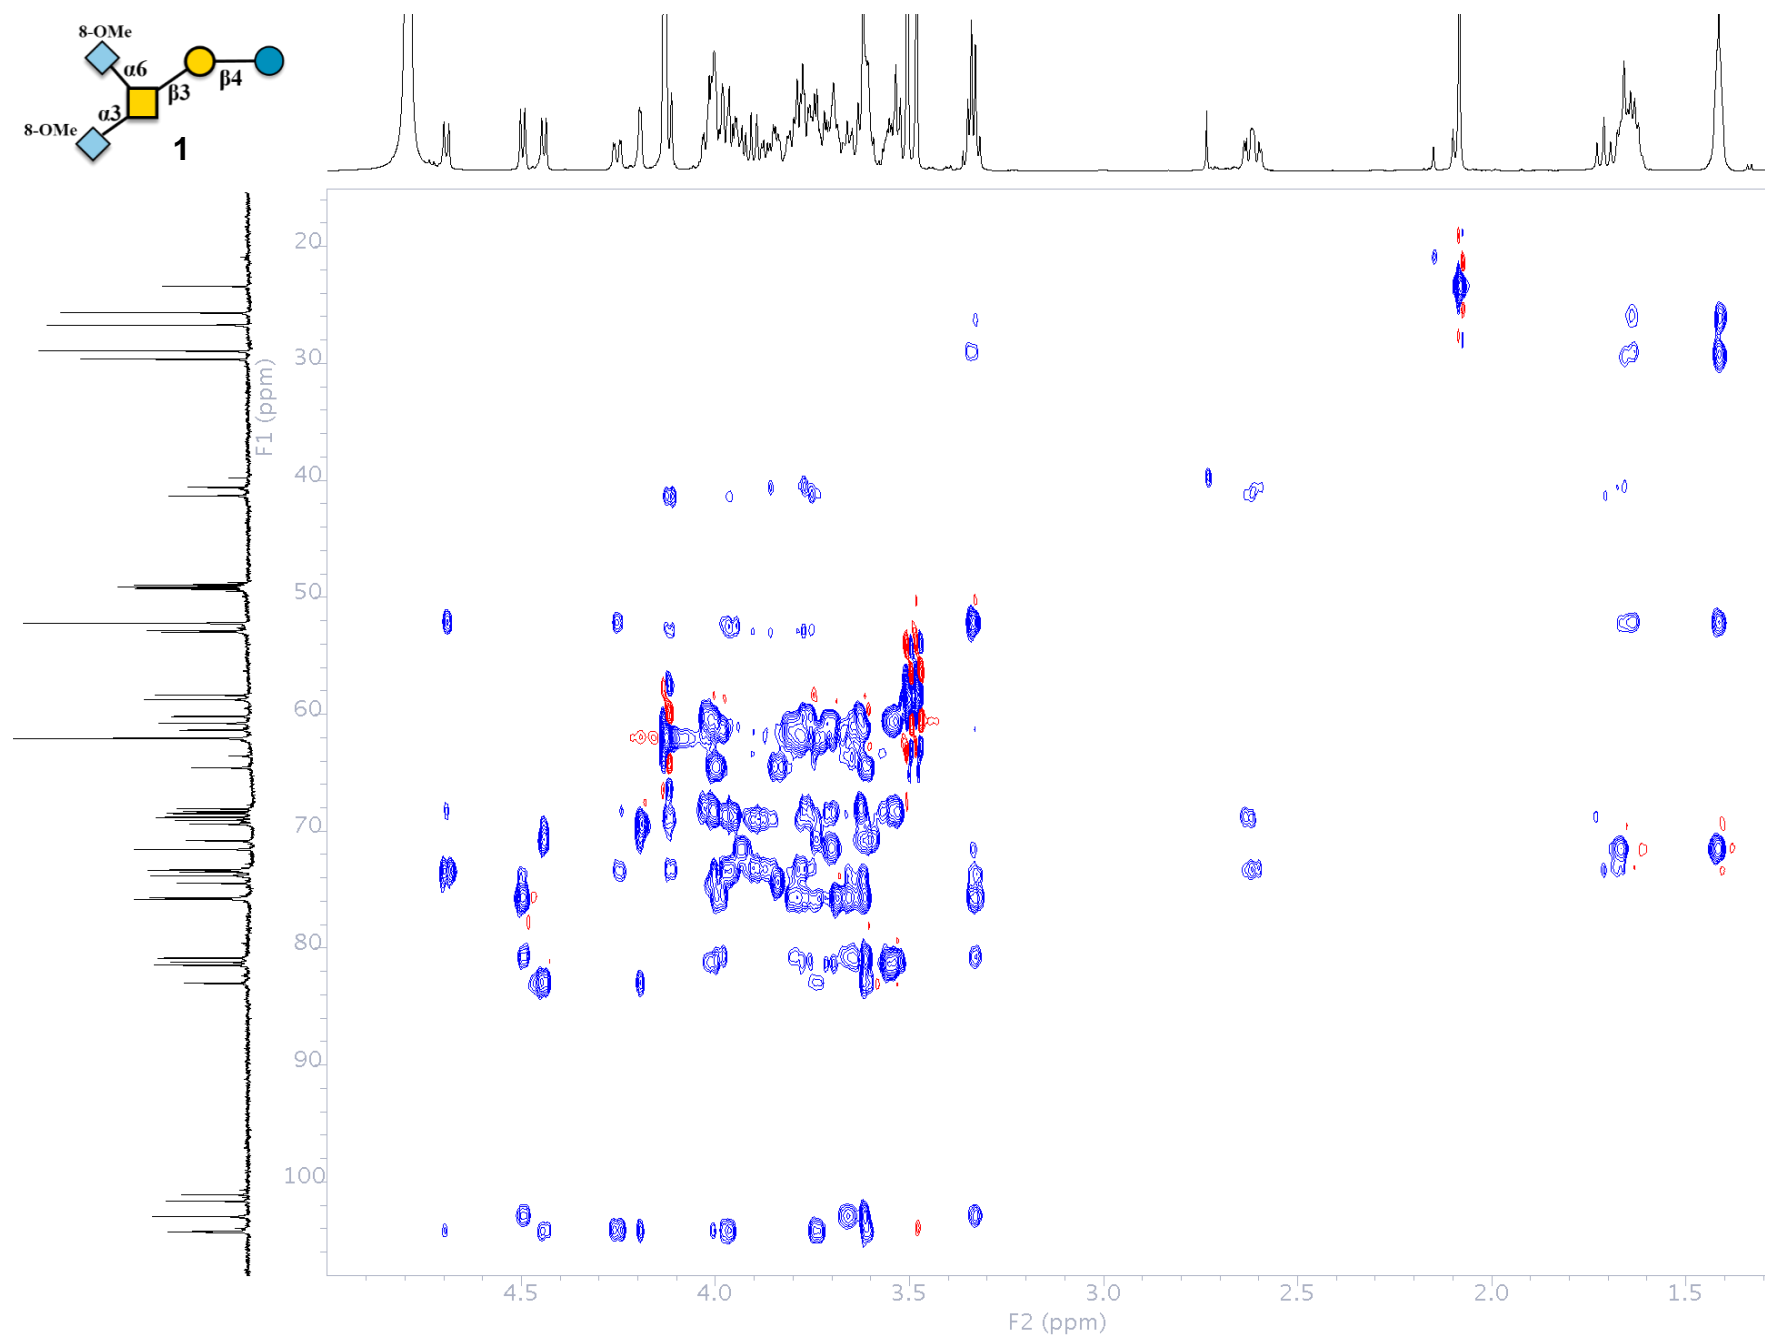

$^1\text{H}$ - $^{13}\text{C}$  HSQC-TOCSY NMR spectrum of Compound 1 (700 MHz/175 MHz  $\text{D}_2\text{O}$ )

4.7895  
4.7075  
4.6932  
4.4961  
4.4826  
4.4655  
4.4523  
4.4373  
4.4140  
4.3440  
4.3216  
4.1873  
4.1263  
4.0529  
4.0350  
4.0258  
4.0141  
4.0094  
4.0033  
3.9978  
3.9806  
3.9629  
3.9480  
3.9435  
3.9398  
3.9345  
3.9267  
3.9230  
3.9093  
3.9041  
3.8871  
3.8790  
3.8683  
3.8607  
3.8514  
3.8438  
3.8323  
3.8184  
3.8121  
3.8072  
3.7988  
3.7840  
3.7679  
3.7473  
3.7678  
3.7625  
3.7507  
3.7354  
3.7291  
3.7119  
3.7005  
3.6950  
3.6841  
3.6722  
3.6586  
3.6498  
3.6467  
3.6409  
3.6321  
3.6206  
3.6141  
3.6068  
3.6006  
3.5845  
3.5732  
3.5531  
3.5399  
3.5340  
3.5285  
3.5207  
3.5138  
3.4979  
3.4747  
3.4560  
3.4548  
3.4450  
3.4334  
3.4218  
3.4192  
3.4161  
3.4089  
3.4072  
3.3934  
3.3609  
3.3533  
3.3404  
3.3330  
3.3007  
2.9934  
2.5801  
2.5736  
2.5736  
2.0777  
1.6872  
1.6674  
1.6614  
1.6479  
1.6360  
1.6269  
1.6123  
1.6070  
1.6014  
1.4194  
1.4131  
1.4073  
1.4012  
1.3953

THK-isogAA7-N3

Current Data Parameters  
 NAME THK-144-HPLC-top  
 EXPNO 1  
 PROCNO 1  
 F2 - Acquisition Parameters  
 Date\_ 20190531  
 Time 12.27  
 INSTRUM spect  
 PROBHD 5 mm QNP 1H/1  
 PULPROG zg  
 TD 32768  
 SOLVENT H2O-D2O  
 NS 128  
 DS 0  
 SWH 9541.984 Hz  
 FIDRES 0.291198 Hz  
 AQ 1.7170432 sec  
 RG 128  
 DW 52.400 usec  
 DE 6.50 usec  
 TE 299.0 K  
 D1 2.00000000 sec  
 MCREST 0 sec  
 MCWRK 0.01500000 sec

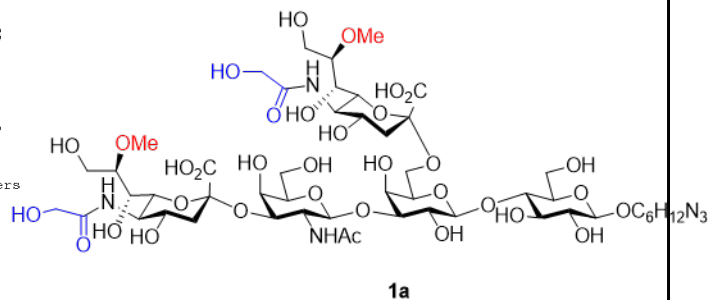

----- CHANNEL f1 -----  
 NUC1 1H  
 P1 10.15 usec  
 PL1 -1.00 dB  
 SFO1 598.2028120 MHz  
 F2 - Processing parameters  
 SI 32768  
 SF 598.1999486 MHz  
 WDW no  
 SSB 0  
 LB 0 Hz  
 GB 0  
 PC 2.00

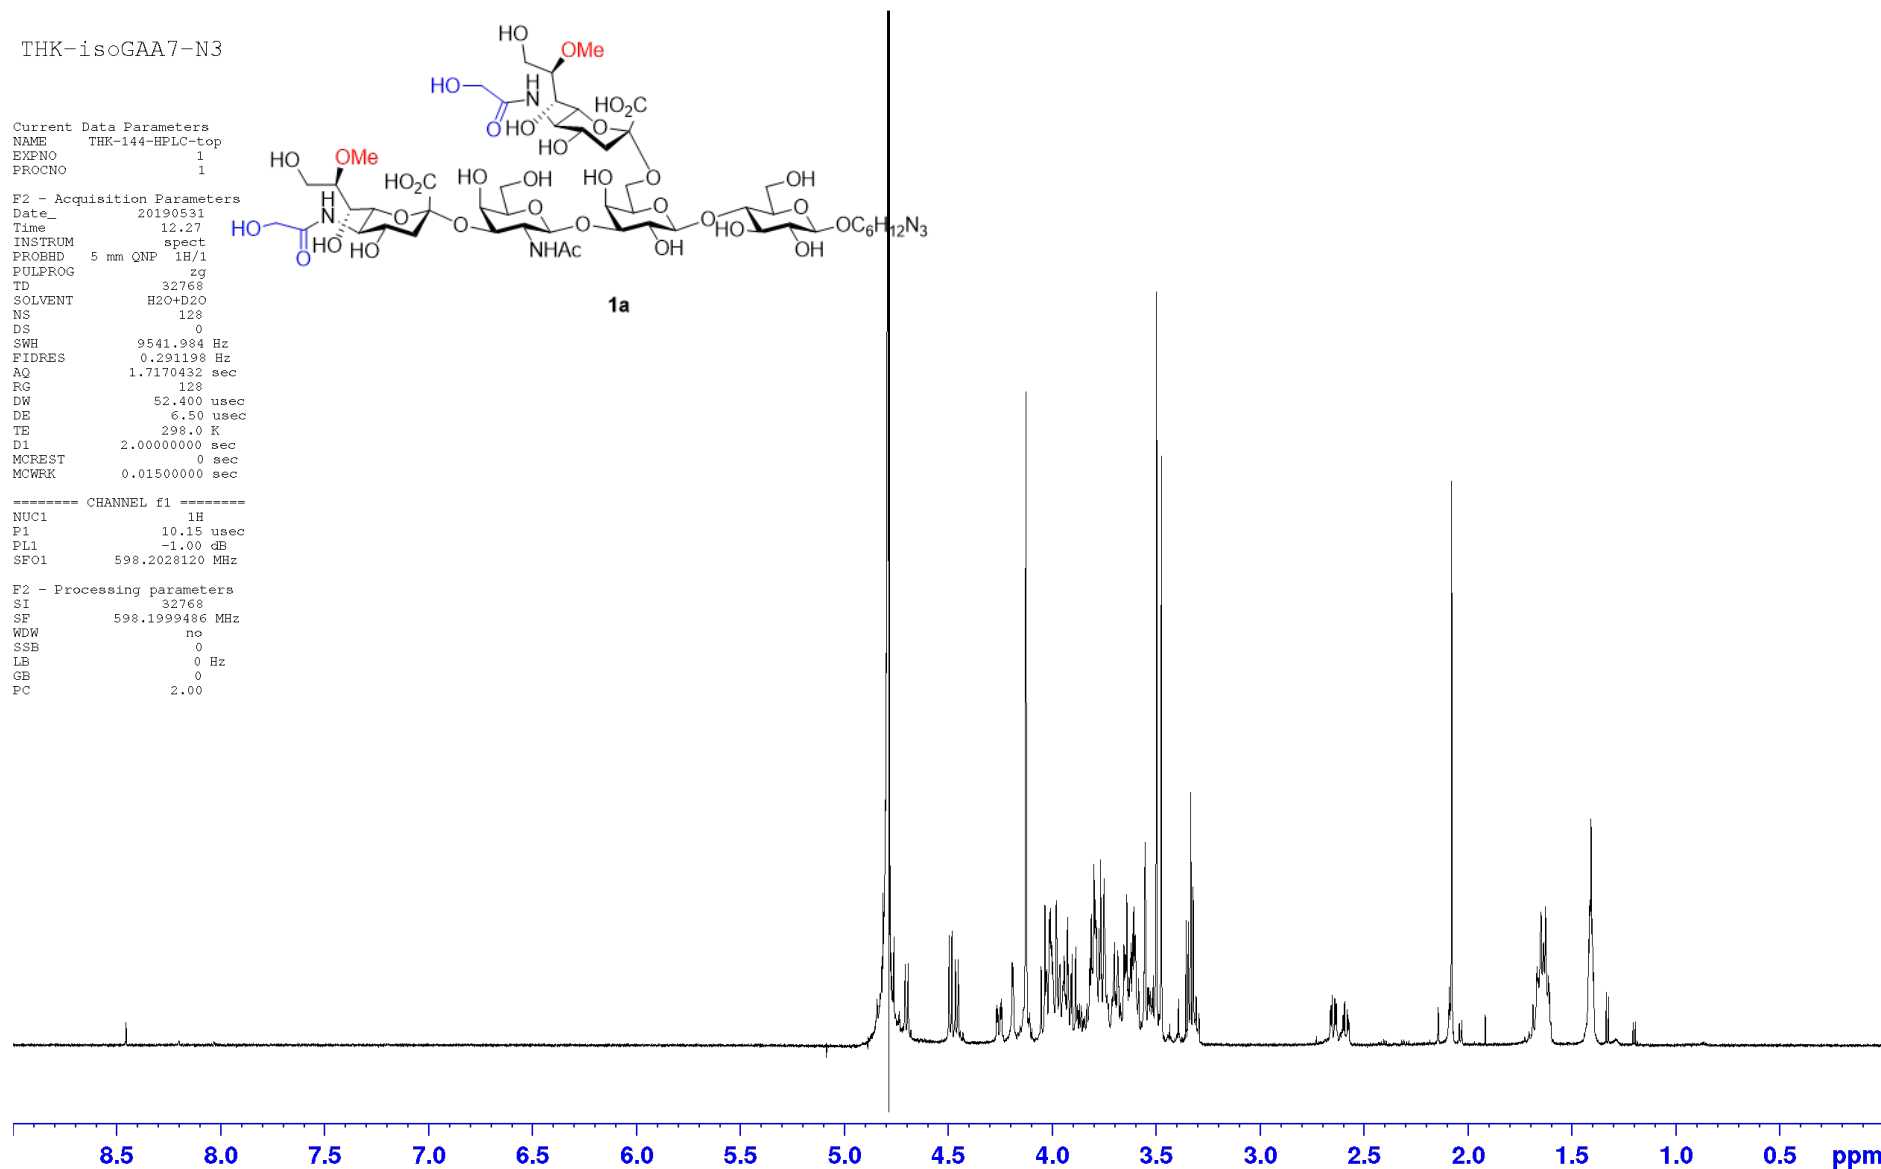

1.10  
1.00  
0.98  
1.00  
1.08  
4.15  
3.98  
4.17  
4.38  
8.21  
9.26  
8.99  
2.93  
1.97  
2.83  
6.28  
4.20

<sup>1</sup>H NMR spectrum of Compound 1a (600 MHz D<sub>2</sub>O)

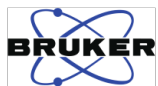

THK-isoGAA-7-N3

Current Data Parameters  
NAME THK-144-HPLC-top  
EXPMO 2  
PROCNO 1

F2 - Acquisition Parameters  
Date\_ 20190531  
Time 12.41  
INSTRUM spect  
PROBHD 5 mm QNP 1H/1  
PULPROG zgpg30  
TD 32768  
SOLVENT H2O-D2O  
NS 24909  
DS 0  
SWH 45045.047 Hz  
FIDRES 1.374666 Hz  
AQ 0.3637248 sec  
RG 4096  
DW 11.100 usec  
DE 6.50 usec  
TE 298.4 K  
D1 3.00000000 sec  
d11 0.03000000 sec  
DELTA 2.90000010 sec  
MCREST 0 sec  
MCWRK 0.01500000 sec

----- CHANNEL f1 -----  
NUC1 13C  
P1 6.20 usec  
PL1 0 dB  
SF01 150.4340559 MHz  
----- CHANNEL f2 -----  
CPDPRG2 waltz16  
NUC2 1H  
PCPD2 92.00 usec  
PL2 120.00 dB  
PL12 12.00 dB  
PL13 15.00 dB  
SF02 598.2029910 MHz

F2 - Processing parameters  
SI 65536  
SF 150.4173652 MHz  
WDW EM  
SFB 0  
LB 3.00 Hz  
GB 0  
PC 1.00

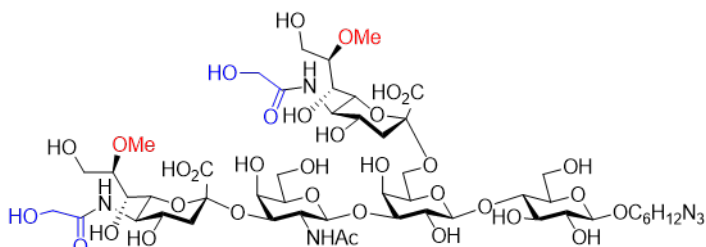

1a

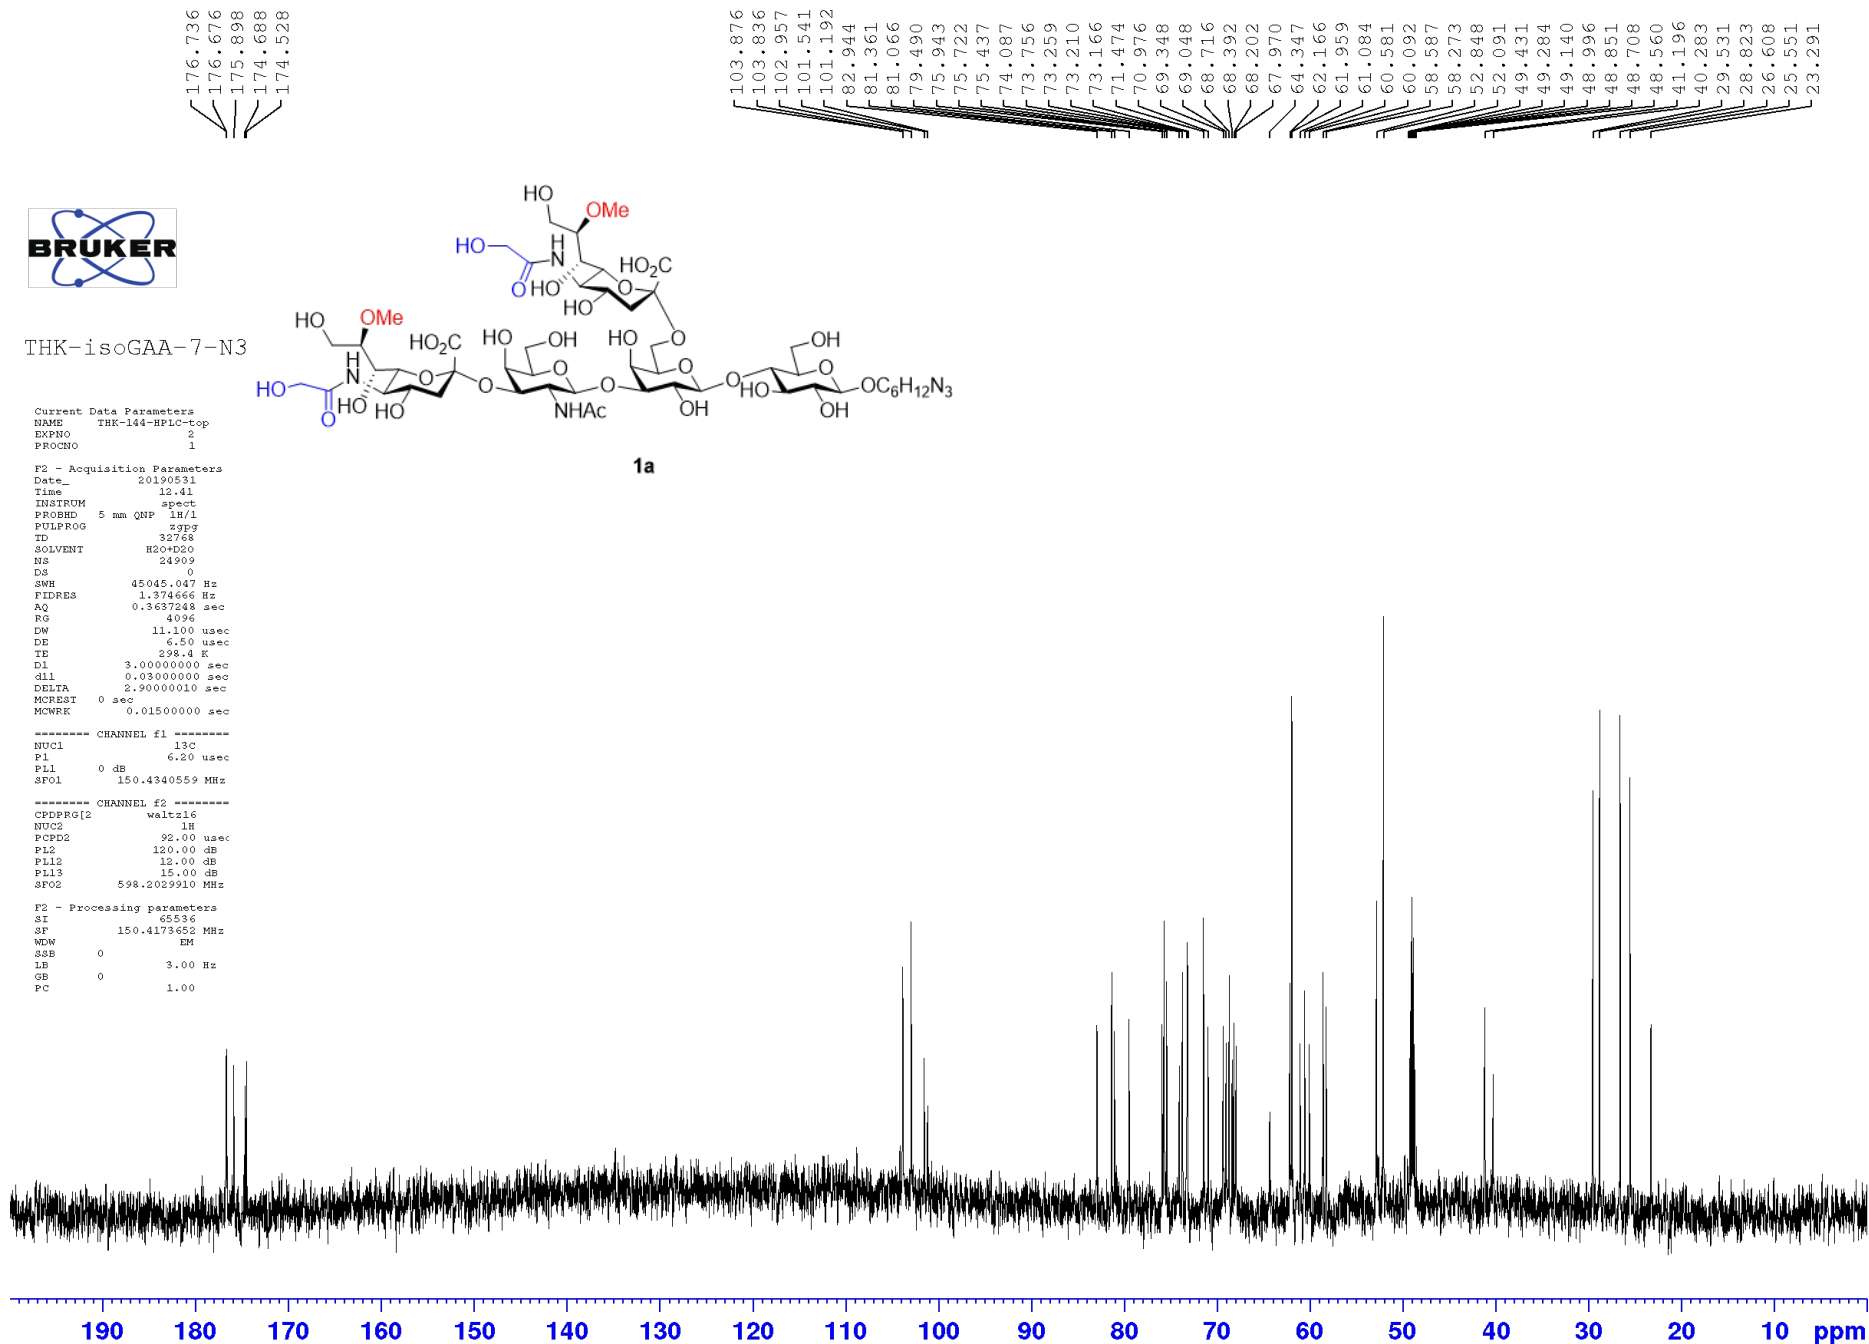

<sup>13</sup>C NMR spectrum of Compound 1a (150 MHz D<sub>2</sub>O)

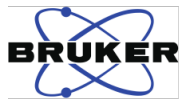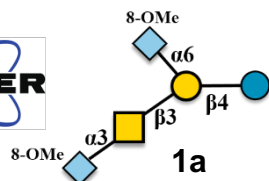

THK-isoGAA-7-N3

Current Data Parameters  
NAME THK-144-HPLC-top  
EXPNO 11  
PROCNO 1

F2 - Acquisition Parameters  
Date\_ 20190601  
Time 12.40  
INSTRUM spect  
PROBHD 5 mm QNP 1H/1  
PULPROG cosyqf  
TD 2048  
SOLVENT Acetone  
NS 16  
DS 0  
SWH 6009.615 Hz  
FIDRES 2.934392 Hz  
AQ 0.1703936 sec  
RG 128  
DW 83.200 usec  
DE 6.50 usec  
TE 298.2 K  
d0 0.00000300 sec  
D1 1.50000000 sec  
IN0 0.00016640 sec  
MCREST 0 sec  
MCWRK 1.50000000 sec

===== CHANNEL f1 =====  
NUC1 1H  
P0 13.00 usec  
P1 10.50 usec  
PL1 -1.00 dB  
SFO1 598.2028140 MHz

F1 - Acquisition parameters  
TD 256  
SFO1 598.2028 MHz  
FIDRES 46.950119 Hz  
SW 10.046 ppm  
FhMODE QF

F2 - Processing parameters  
SI 2048  
SF 598.1999486 MHz  
WDW QSINE  
SSB 0  
LB 0 Hz  
GB 0  
PC 1.00

F1 - Processing parameters  
SI 512  
MC2 QF  
SF 598.1999486 MHz  
WDW QSINE  
SSB 0  
LB 0 Hz  
GB 0

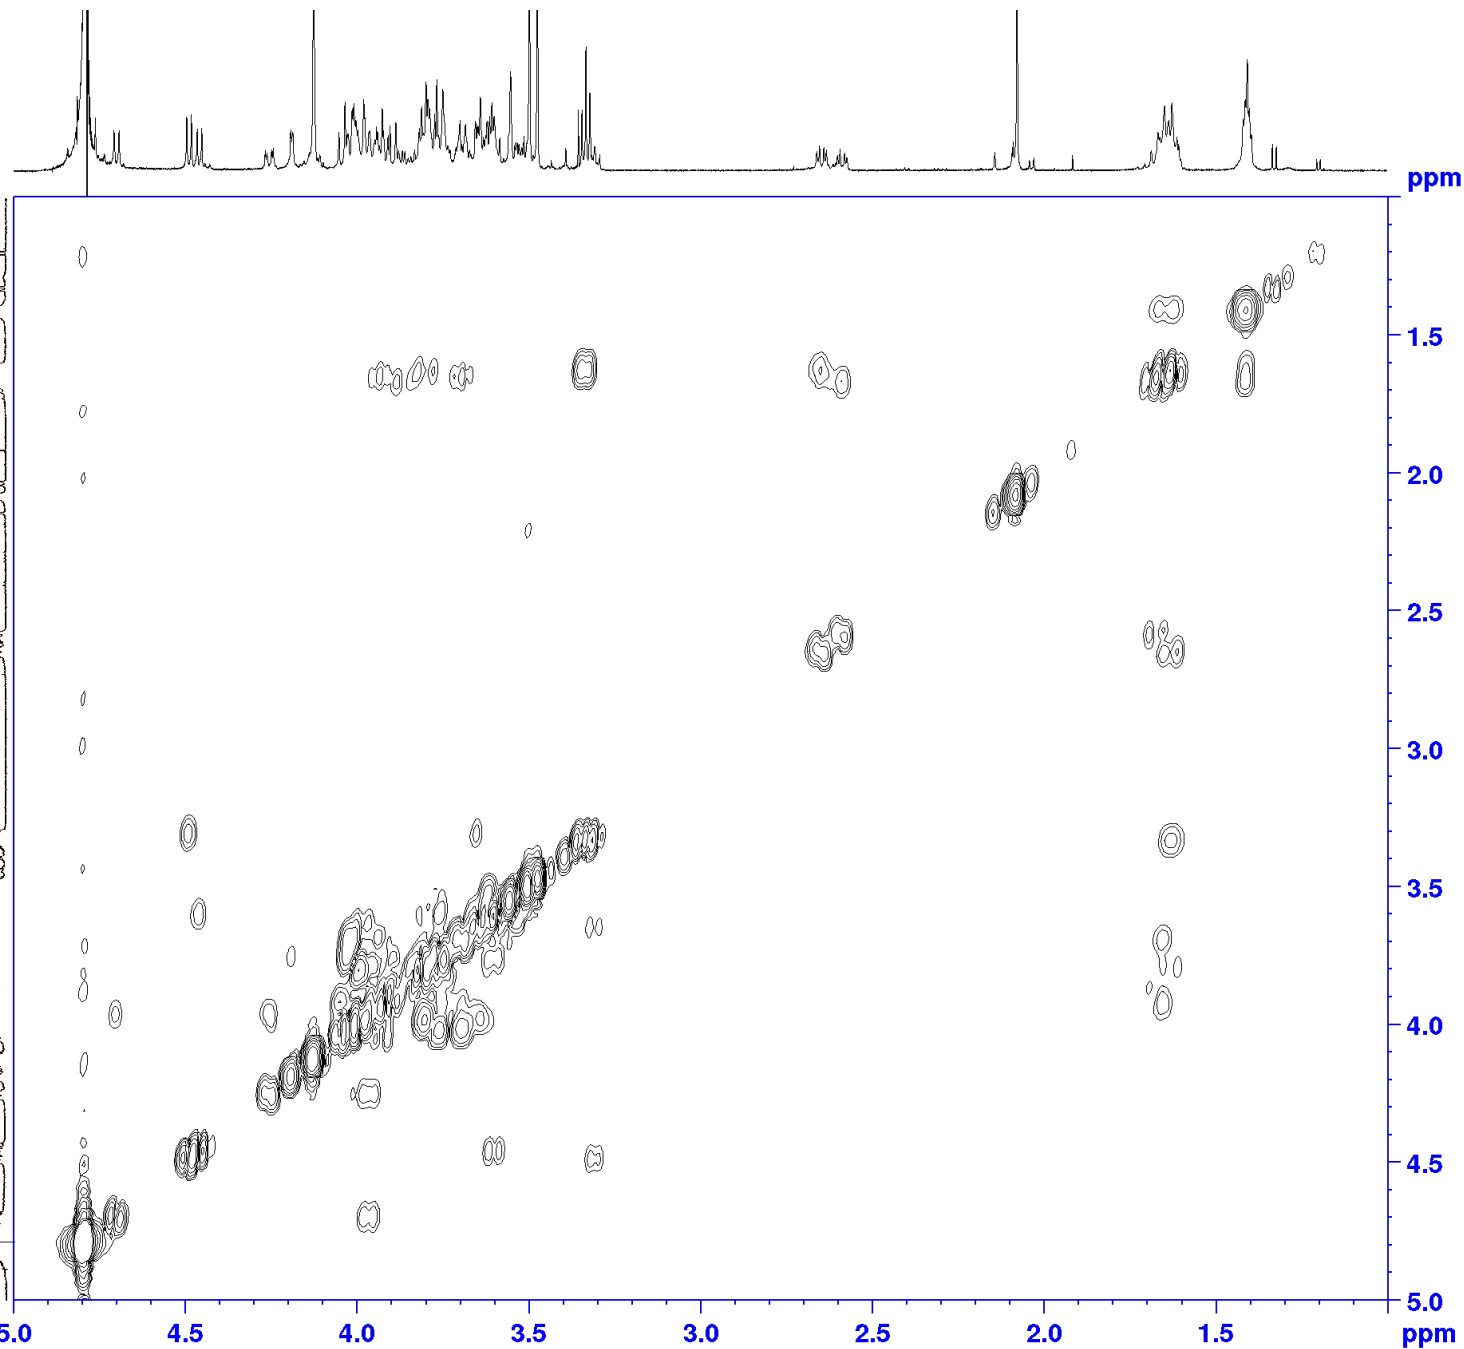

$^1\text{H}$ - $^1\text{H}$  COSY NMR spectrum of Compound 1a (600 MHz  $\text{D}_2\text{O}$ )

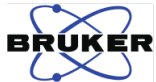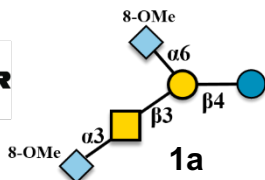

THK-isoGAA-7-N3

Current Data Parameters  
NAME THK-144-RPLC-top  
EXPNO 12  
PROCNO 1

F2 - Acquisition Parameters  
Date\_ 20190601  
Time 14:27  
INSTRUM spect  
PROBHD 5 mm QNP 1H/1  
PULPROG hsqcetgps1  
TD 2048  
SOLVENT CDCl3  
NS 64  
DS 8  
SWH 6009.615 Hz  
FIDRES 2.934382 Hz  
AQ 0.1703936 sec  
RG 32768  
DW 83.200 usec  
DE 6.50 usec  
TE 297.8 K  
CNST2 145.000000  
d0 0.00000300 sec  
d1 1.20000005 sec  
d4 0.00172414 sec  
d11 0.03000000 sec  
d13 0.00000400 sec  
d16 0.00050000 sec  
D24 0.00089000 sec  
DELTA 0.00157700 sec  
DELTA1 0.00150800 sec  
IN0 0.00001511 sec  
MCREST 0 sec  
MCMRK 0.20000041 sec  
STCNT 0

----- CHANNEL f1 -----  
NUC1 1H  
P1 10.50 usec  
P2 21.00 usec  
P28 1000.00 usec  
P11 -1.00 dB  
SF01 598.2028140 MHz

----- CHANNEL f2 -----  
CPDPRG2 gamp  
NUC2 13C  
P3 10.00 usec  
P4 20.00 usec  
PCPD2 70.00 usec  
P12 0 dB  
P112 20.00 dB  
SF02 150.4287913 MHz

----- GRADIENT CHANNEL -----  
GPNAM[1] SINE.100  
GPNAM[2] SINE.100  
GPX1 0 %  
GPX2 0 %  
GPY1 0 %  
GPY2 0 %  
GPZ1 80.00 %  
GPZ2 20.10 %  
P16 1000.00 usec

F1 - Acquisition parameters  
TD 256  
SF01 150.4288 MHz  
FIDRES 258.478088 Hz  
SW 219.939 ppm  
FMODE Echo-Antiecho

F2 - Processing parameters  
SI 2048  
SF 598.1999730 MHz  
WDW QSINE  
SSB 4  
LB 0 Hz  
GB 0  
PC 1.00

F1 - Processing parameters  
SI 512  
MC2 echo-antiecho  
SF 150.4173652 MHz  
WDW QSINE  
SSB 4  
LB 0 Hz  
GB 0

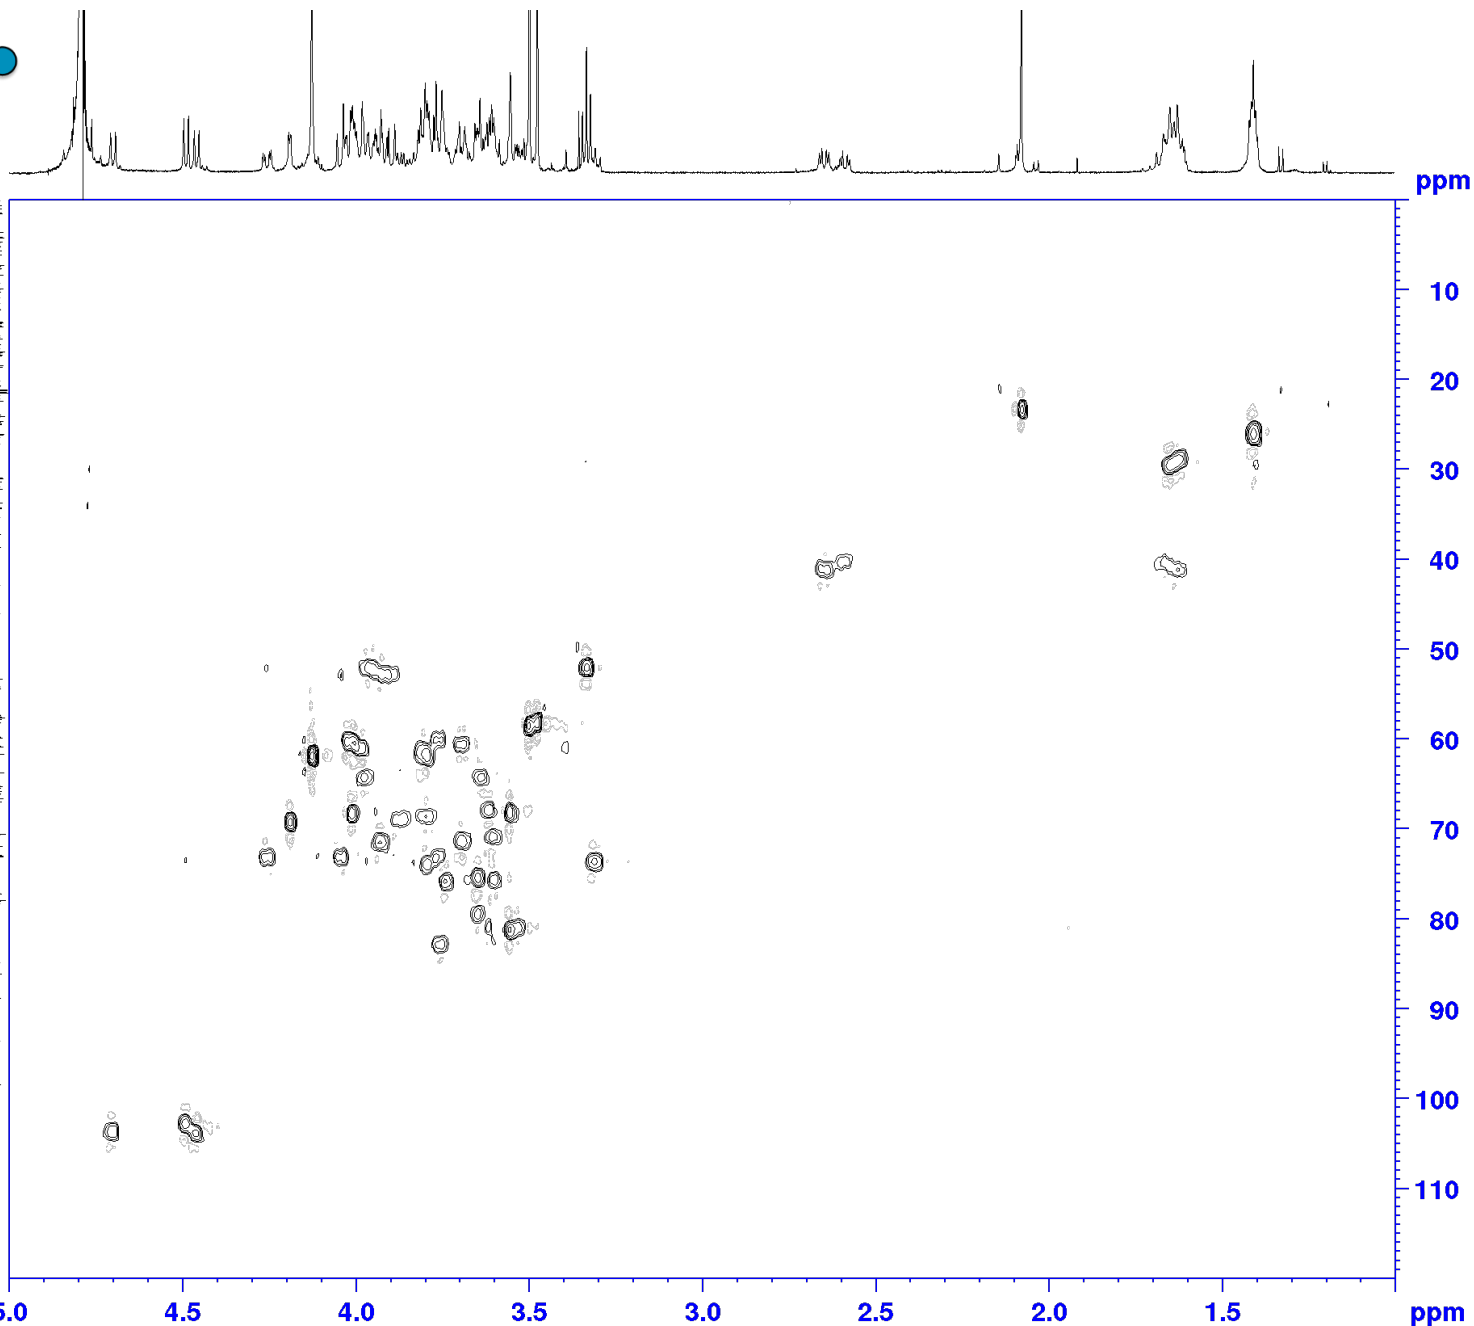

$^1\text{H}$ - $^{13}\text{C}$  HSQC NMR spectrum of Compound 1a (600 MHz/150 MHz  $\text{D}_2\text{O}$ )

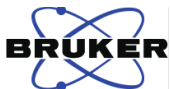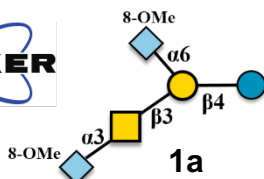

THK-isoGAA-7-N3

Current Data Parameters  
NAME THK-144-HPIC-top  
EXPNO 13  
PROCNO 1

F2 - Acquisition Parameters  
Date\_ 20190601  
Time 20.59  
INSTRUM spect  
PROBHD 5 mm QNP 1H/1  
PULPROG hmcgpp1pdgdf  
TD 2048  
SOLVENT cdcl3  
NS 128  
DS 0  
SWH 6009.615 Hz  
FIDRES 2.934382 Hz  
AQ 0.1703396 sec  
RG 32768  
DW 83.200 usec  
DE 6.00 usec  
TE 298.3 K  
CNS12 145.000000  
CNS13 12.000000  
d0 0.00000300 sec  
d1 1.00000000 sec  
d2 0.00344828 sec  
d5 0.04166667 sec  
d16 0.00050000 sec  
IN0 0.00001661 sec  
MCREST 0 sec  
MCWRK 1.00000000 sec

===== CHANNEL f1 =====  
NUC1 1H  
P1 10.50 usec  
P2 21.00 usec  
PL1 -1.00 dB  
SFO1 598.2028140 MHz

===== CHANNEL f2 =====  
NUC2 13C  
P3 12.00 usec  
PL2 0 dB  
SFO2 150.4310476 MHz

===== GRADIENT CHANNEL =====  
GPNAM[1] SINE.100  
GPNAM[2] SINE.100  
GPNAM[3] SINE.100  
GPX1 0 %  
GPX2 0 %  
GPX3 0 %  
GPI1 0 %  
GPV2 0 %  
GPV3 0 %  
GPZ1 50.00 %  
GPZ2 30.00 %  
GPZ3 40.10 %  
PI6 1000.00 usec

F1 - Acquisition parameters  
TD 256  
SFO1 150.431 MHz  
FIDRES 235.139206 Hz  
SW 200.077 ppm  
FhMODE QF

F2 - Processing parameters  
SI 4096  
SF 598.1999550 MHz  
WDW QSINE  
SSB 2  
LB 0 Hz  
GB 0  
PC 1.00

F1 - Processing parameters  
SI 512  
MC2 QF  
SF 150.4173652 MHz  
WDW SINE  
SSB 0  
LB 0 Hz  
GB 0

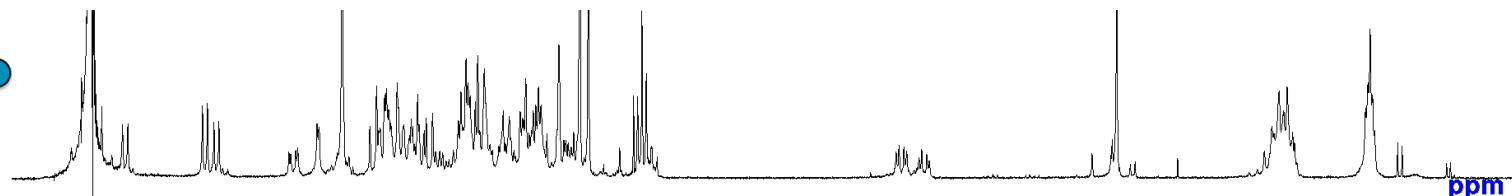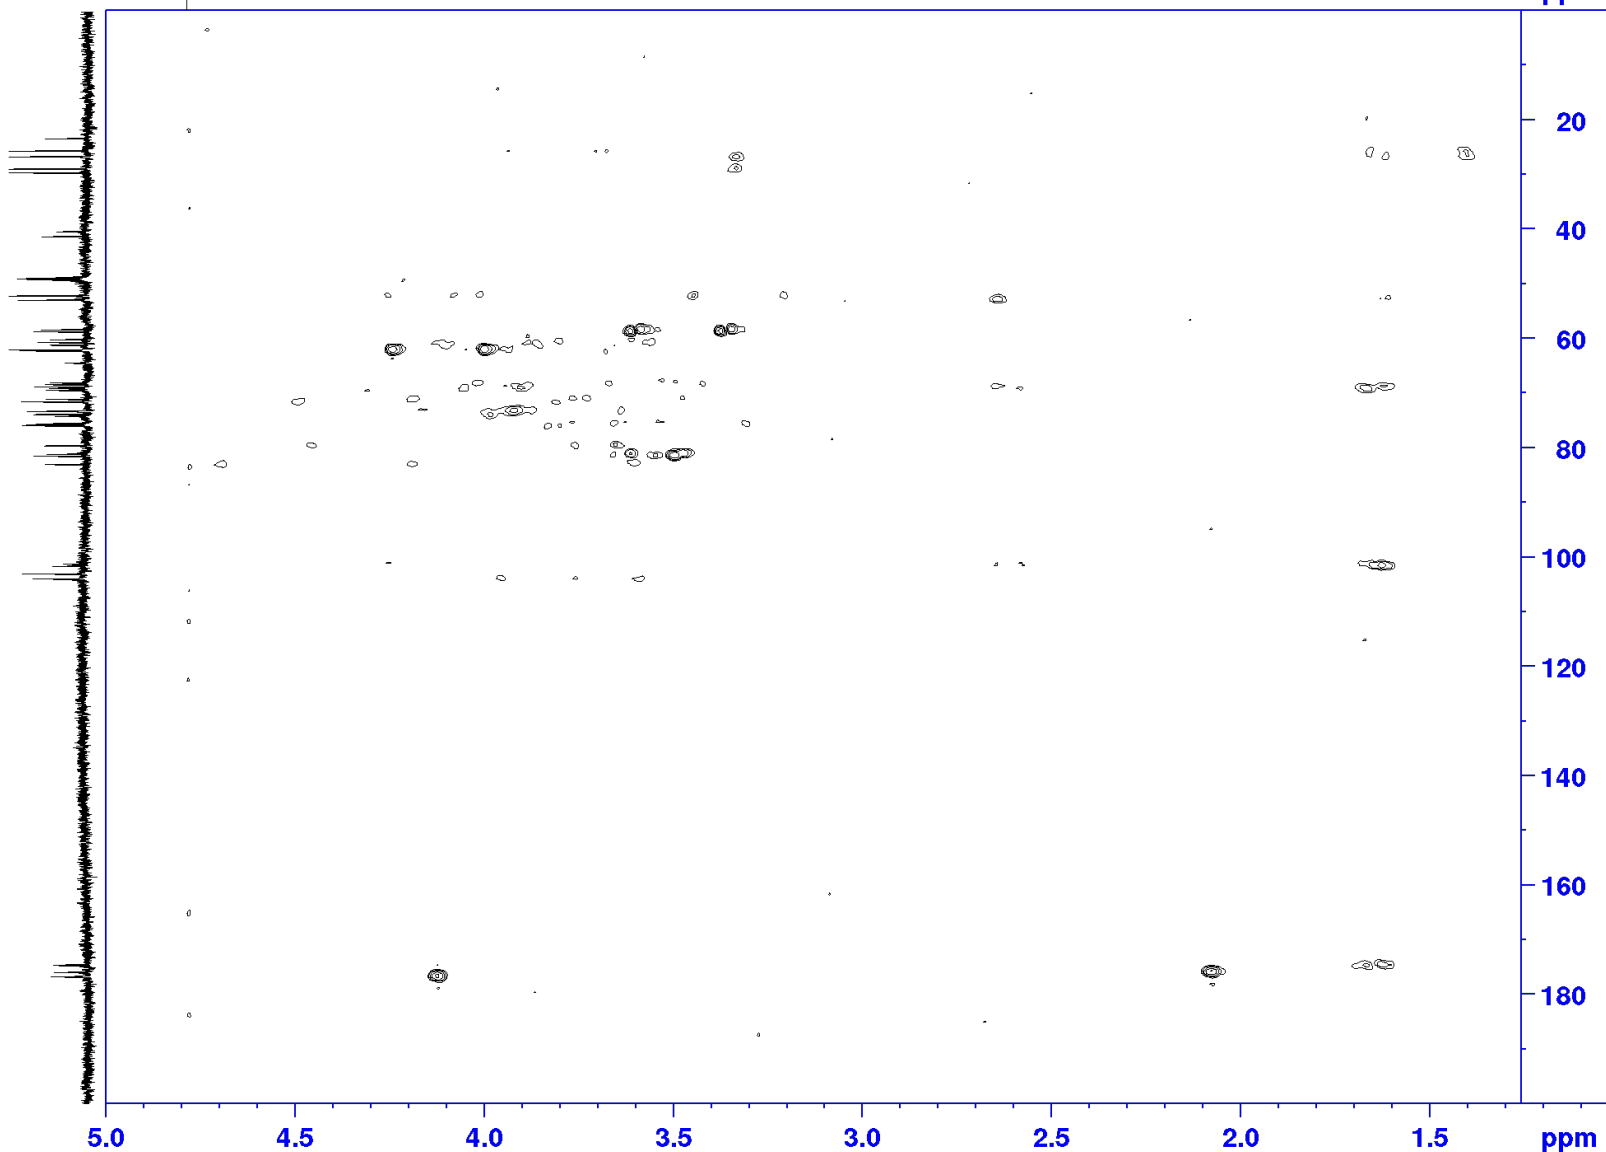

$^1\text{H}$ - $^{13}\text{C}$  HMBC NMR spectrum of Compound **1a** (600 MHz/150 MHz D<sub>2</sub>O)



THK-GAA7-0

Current Data Parameters  
NAME THK-015-170817  
EXPNO 1  
PROCNO 1

F2 - Acquisition Parameters  
Date\_ 20170820  
Time 22.53  
INSTRUM spect  
PROBHD 5 mm QNP 1H/1  
PULPROG zg  
TD 32768  
SOLVENT H2O+D2O  
NS 32  
DS 0  
SWH 9541.984 Hz  
FIDRES 0.291198 Hz  
AQ 1.7170432 sec  
RG 512  
DW 52.400 usec  
DE 6.50 usec  
TE 300.3 K  
D1 2.00000000 sec  
MCREST 0 sec  
MCWRK 0.01500000 sec

==== CHANNEL f1 =====  
NUC1 1H  
P1 20.00 usec  
PL1 0 dB  
SFO1 598.4028152 MHz

F2 - Processing parameters  
SI 32768  
SF 598.3999460 MHz  
WDW EM  
SSB 0  
LB 0.30 Hz  
GB 0  
PC 1.00

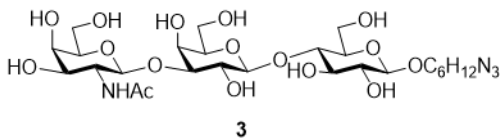

4.7898  
4.6332  
4.6191  
4.4843  
4.4710  
4.4482  
4.4351  
4.1634  
4.1584  
3.9883  
3.9688  
3.9409  
3.9351  
3.9237  
3.9184  
3.9071  
3.8150  
3.8052  
3.7951  
3.7848  
3.7734  
3.7662  
3.7533  
3.7472  
3.7407  
3.7387  
3.7353  
3.7271  
3.7201  
3.7141  
3.7077  
3.6960  
3.6902  
3.6789  
3.6693  
3.6586  
3.6470  
3.6397  
3.6316  
3.6141  
3.5998  
3.5844  
3.5459  
3.5344  
3.5230  
3.5147  
3.5071  
3.5010  
3.4941  
3.4875  
3.4851  
1.6735  
1.6607  
1.6493  
1.6371  
1.6244  
1.6130  
1.6022  
1.4188  
1.4141  
1.4079  
1.4020  
1.3960

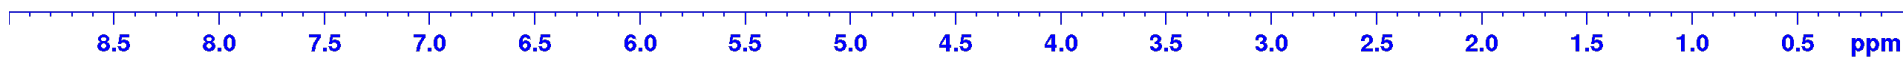

1.00  
1.03  
1.10  
1.01  
4.14  
4.12  
3.27  
1.20  
2.07  
2.04  
2.09  
3.08

2.89  
4.44  
4.46

<sup>1</sup>H NMR spectrum of Compound 3 (600 MHz D<sub>2</sub>O)

176.056

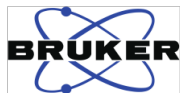

THK-0-GAA-7

Current Data Parameters  
NAME THK-015-170817  
EXPNO 2  
PROCNO 1

F2 - Acquisition Parameters  
Date\_ 20170820  
Time 23.01  
INSTRUM spect  
PROBHD 5 mm QNP 1H/1  
PULPROG zgpg  
TD 32768  
SOLVENT CDCl3  
NS 5028  
DS 0  
SWH 45045.047 Hz  
FIDRES 1.374666 Hz  
AQ 0.3637248 sec  
RG 4096  
DW 11.100 usec  
DE 6.50 usec  
TE 300.4 K  
D1 3.5000000 sec  
d11 0.0300000 sec  
DELTA 3.4000010 sec  
MCREST 0 sec  
MCWRK 0.0150000 sec

===== CHANNEL f1 =====  
NUC1 13C  
P1 4.80 usec  
PL1 0 dB  
SFO1 150.4835991 MHz  
===== CHANNEL f2 =====  
CPDPRG2 waltz16  
NUC2 1H  
PCPD2 92.00 usec  
PL2 120.00 dB  
PL12 6.00 dB  
PL13 9.00 dB  
SFO2 598.4029920 MHz

F2 - Processing parameters  
SI 65536  
SF 150.4676524 MHz  
WDW EM  
SSB 0  
LB 3.00 Hz  
GB 0  
FC 1.00

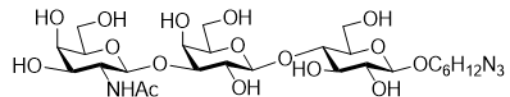

3

104.258  
103.932  
103.009

82.725  
79.390  
75.948  
75.849  
75.728  
75.434  
73.806  
71.730  
71.471  
71.050  
69.451  
68.748  
61.958  
61.918  
61.092  
53.555  
52.097  
49.432  
49.287  
49.144  
48.999  
48.855  
48.711  
48.568  
29.562  
28.847  
26.631  
25.574  
23.189

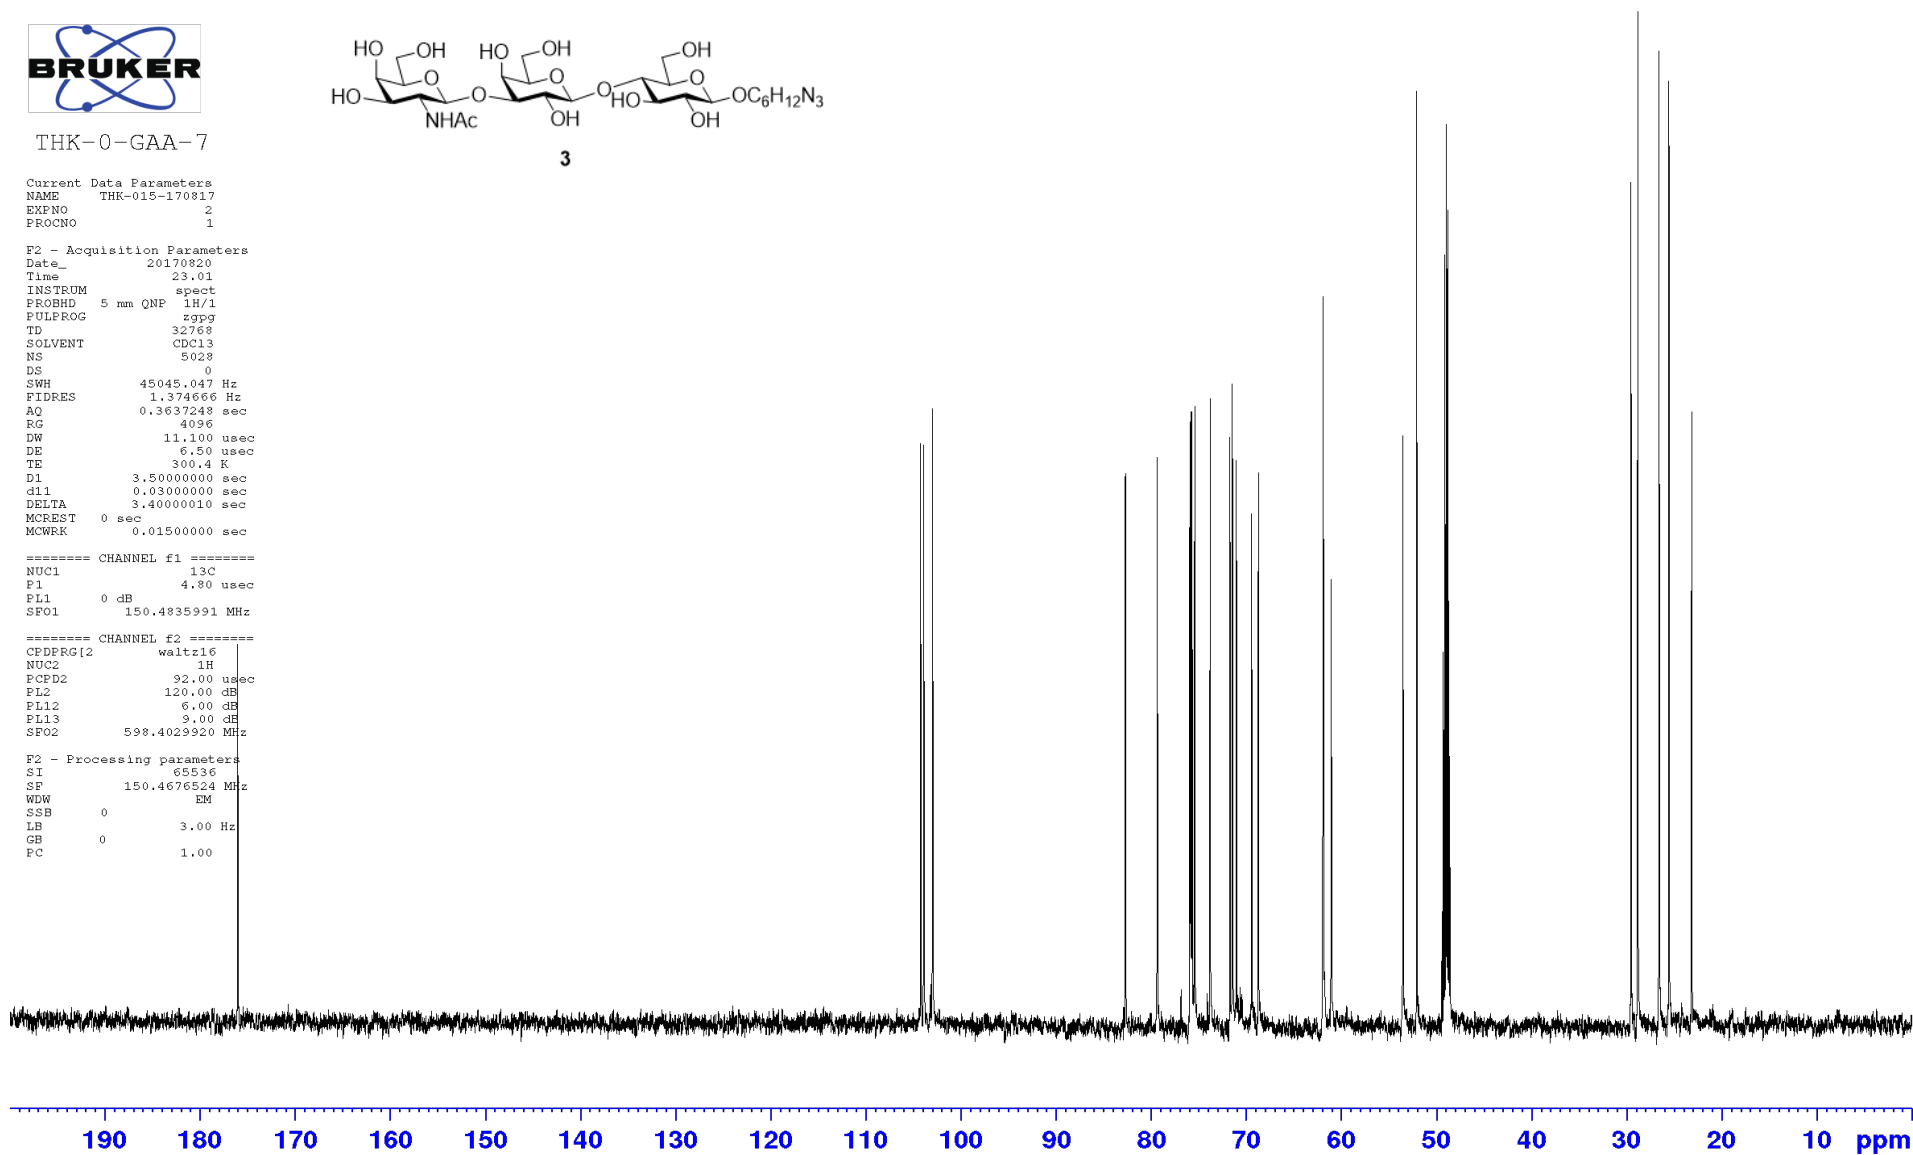

<sup>13</sup>C NMR spectrum of Compound 3 (150 MHz D<sub>2</sub>O)

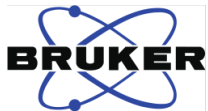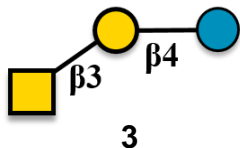

THK-0-GAA-7

Current Data Parameters  
NAME THK-015-170817  
EXPNO 11  
PROCNO 1

F2 - Acquisition Parameters  
Date\_ 20170821  
Time 6.28  
INSTRUM spect  
PROBHD 5 mm QNP 1H/1  
PULPROG cosyprgf  
TD 2048  
SOLVENT CDCl3  
NS 16  
DS 0  
SWH 6009.615 Hz  
FIDRES 2.934382 Hz  
AQ 0.1703936 sec  
RG 128  
DW 83.200 usec  
DE 6.50 usec  
TE 300.3 K  
d0 0.0000300 sec  
D1 1.5000000 sec  
d11 0.0300000 sec  
d12 0.0000200 sec  
d13 0.0000400 sec  
IN0 0.00016640 sec  
MCREST 0 sec  
MCWRK 0.03000000 sec

----- CHANNEL f1 -----  
NUC1 1H  
P0 10.00 usec  
P1 11.70 usec  
PL1 -2.00 dB  
PL9 55.00 dB  
SFO1 598.4028150 MHz

F1 - Acquisition parameters  
TD 256  
SFO1 598.4028 MHz  
FIDRES 46.950119 Hz  
SW 10.043 ppm  
EnMODE QF

F2 - Processing parameters  
SI 4096  
SF 598.3999460 MHz  
WDW QSINE  
SSB 0  
LB 0 Hz  
GB 0  
PC 1.00

F1 - Processing parameters  
SI 512  
MC2 QF  
SF 598.3999460 MHz  
WDW QSINE  
SSB 0  
LB 0 Hz  
GB 0

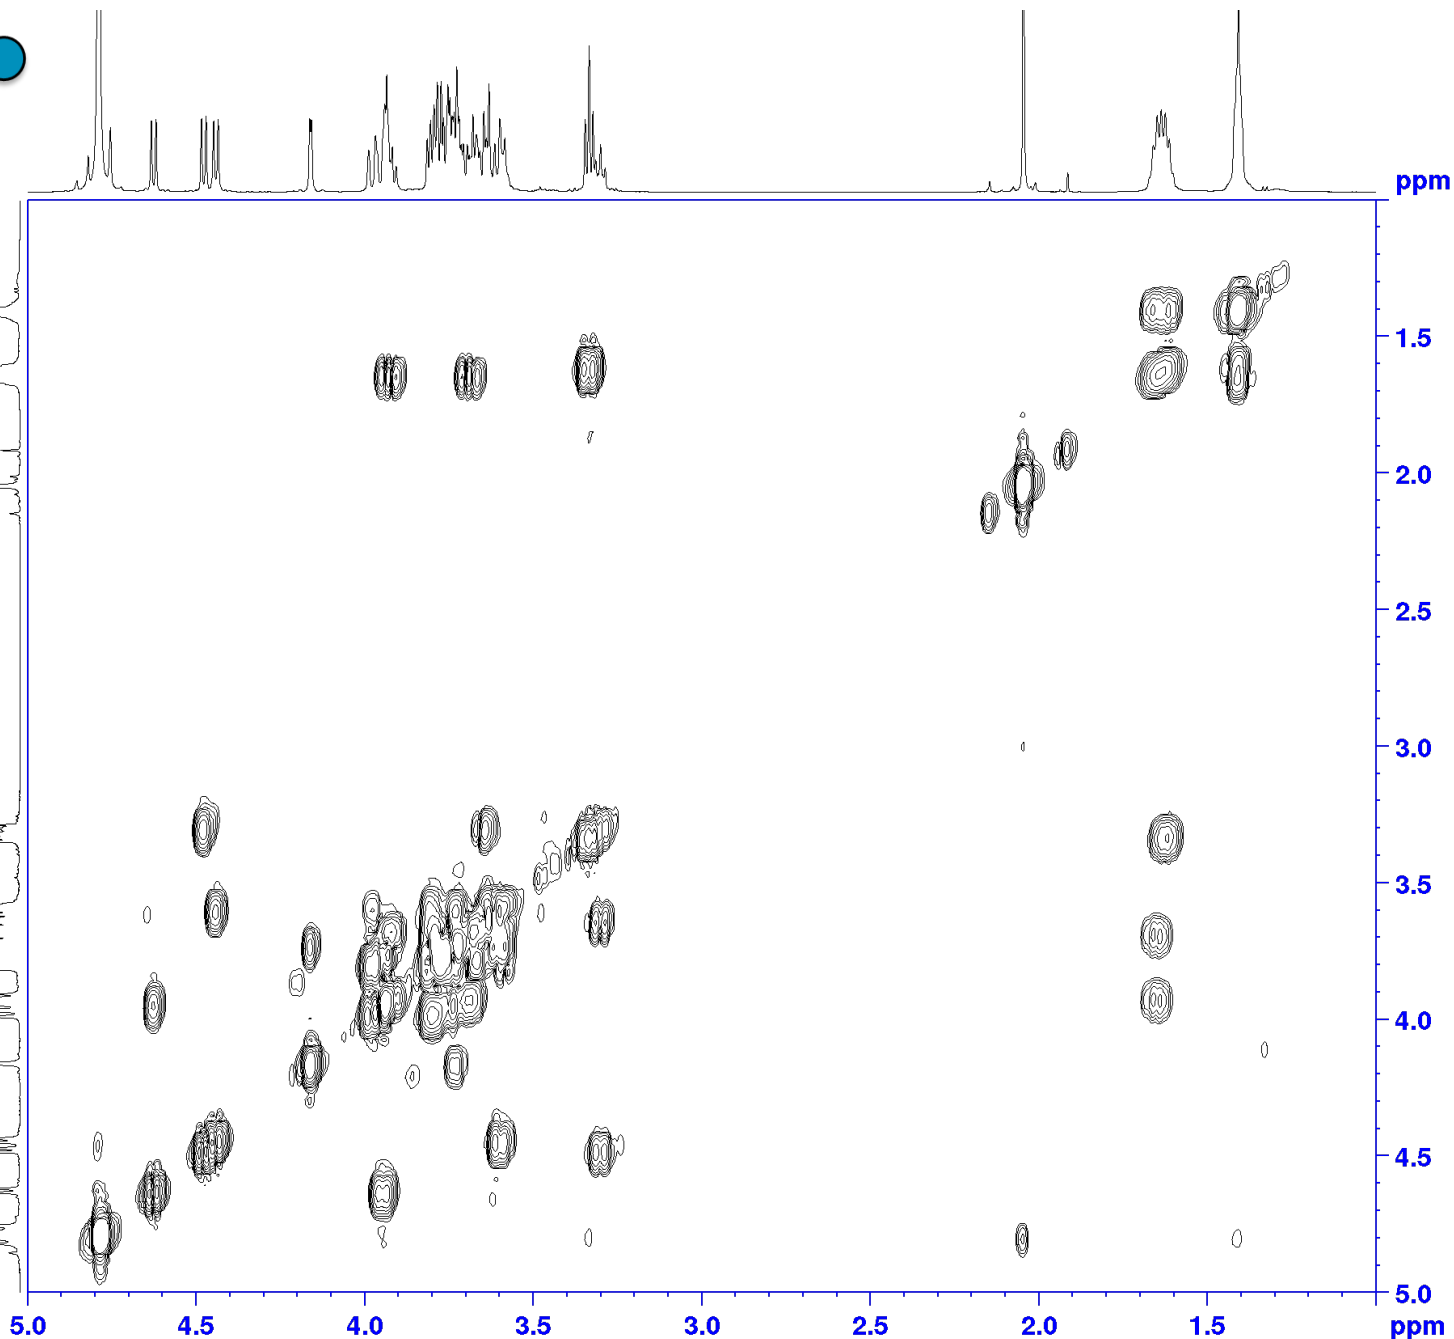

$^1\text{H}$ - $^1\text{H}$  COSY NMR spectrum of Compound 3 (600 MHz  $\text{D}_2\text{O}$ )

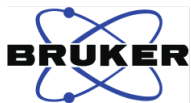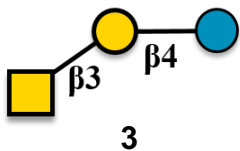

THK-0-GAA-7

```
Current Data Parameters
NAME THK-015-170817
EXPNO 12
PROCNO 1

F2 - Acquisition Parameters
Date_ 20170821
Time 8.26
INSTRUM spect
PROBHD 5 mm QNP 1H/1
PULPROG hsqcetps1
TD 2048
SOLVENT CDCl3
NS 32
DS 8
SWH 6009.615 Hz
FIDRES 2.934382 Hz
AQ 0.1703926 sec
RG 16384
DM 83.200 usec
DE 6.50 usec
TE 300.7 K
CNS12 145.0000000
d0 0.0000300 sec
D1 1.20000005 sec
d4 0.00172414 sec
d11 0.03000000 sec
d13 0.0000400 sec
D16 0.00050000 sec
D24 0.00089000 sec
DELTA 0.00157940 sec
DELTA1 0.00150800 sec
INO 0.00001583 sec
MCKEET 0 sec
MCWRR 0.20000041 sec
ST1CNT 0

===== CHANNEL f1 =====
NUC1 1H
P1 11.70 usec
p2 23.40 usec
P2 1000.00 usec
PL1 -2.00 dB
SFO1 598.4028153 MHz

===== CHANNEL f2 =====
CPDPRG2 garp
NUC2 13C
P3 10.00 usec
p4 20.00 usec
PCPD2 70.00 usec
PL2 0 dB
PL12 20.00 dB
SFO2 150.4798374 MHz

===== GRADIENT CHANNEL =====
GPNM[1] SINE.100
GPNM[2] SINE.100
GPK1 0 %
GPK2 0 %
GPV1 0 %
GPV2 0 %
GPE1 80.00 %
GPE2 20.10 %
P16 1000.00 usec

F1 - Acquisition parameters
TD 256
SFO1 150.4798 MHz
FIDRES 246.840459 Hz
SM 209.966 ppm
FaMODE Echo-Antiecho

F2 - Processing parameters
SI 2048
SF 598.3999540 MHz
WDW QSINE
SSB 4
LB 0 Hz
GB 0
PC 1.00

F1 - Processing parameters
SI 512
MC2 echo-antiecho
SF 150.4676524 MHz
WDW QSINE
SSB 4
LB 0 Hz
GB 0
```

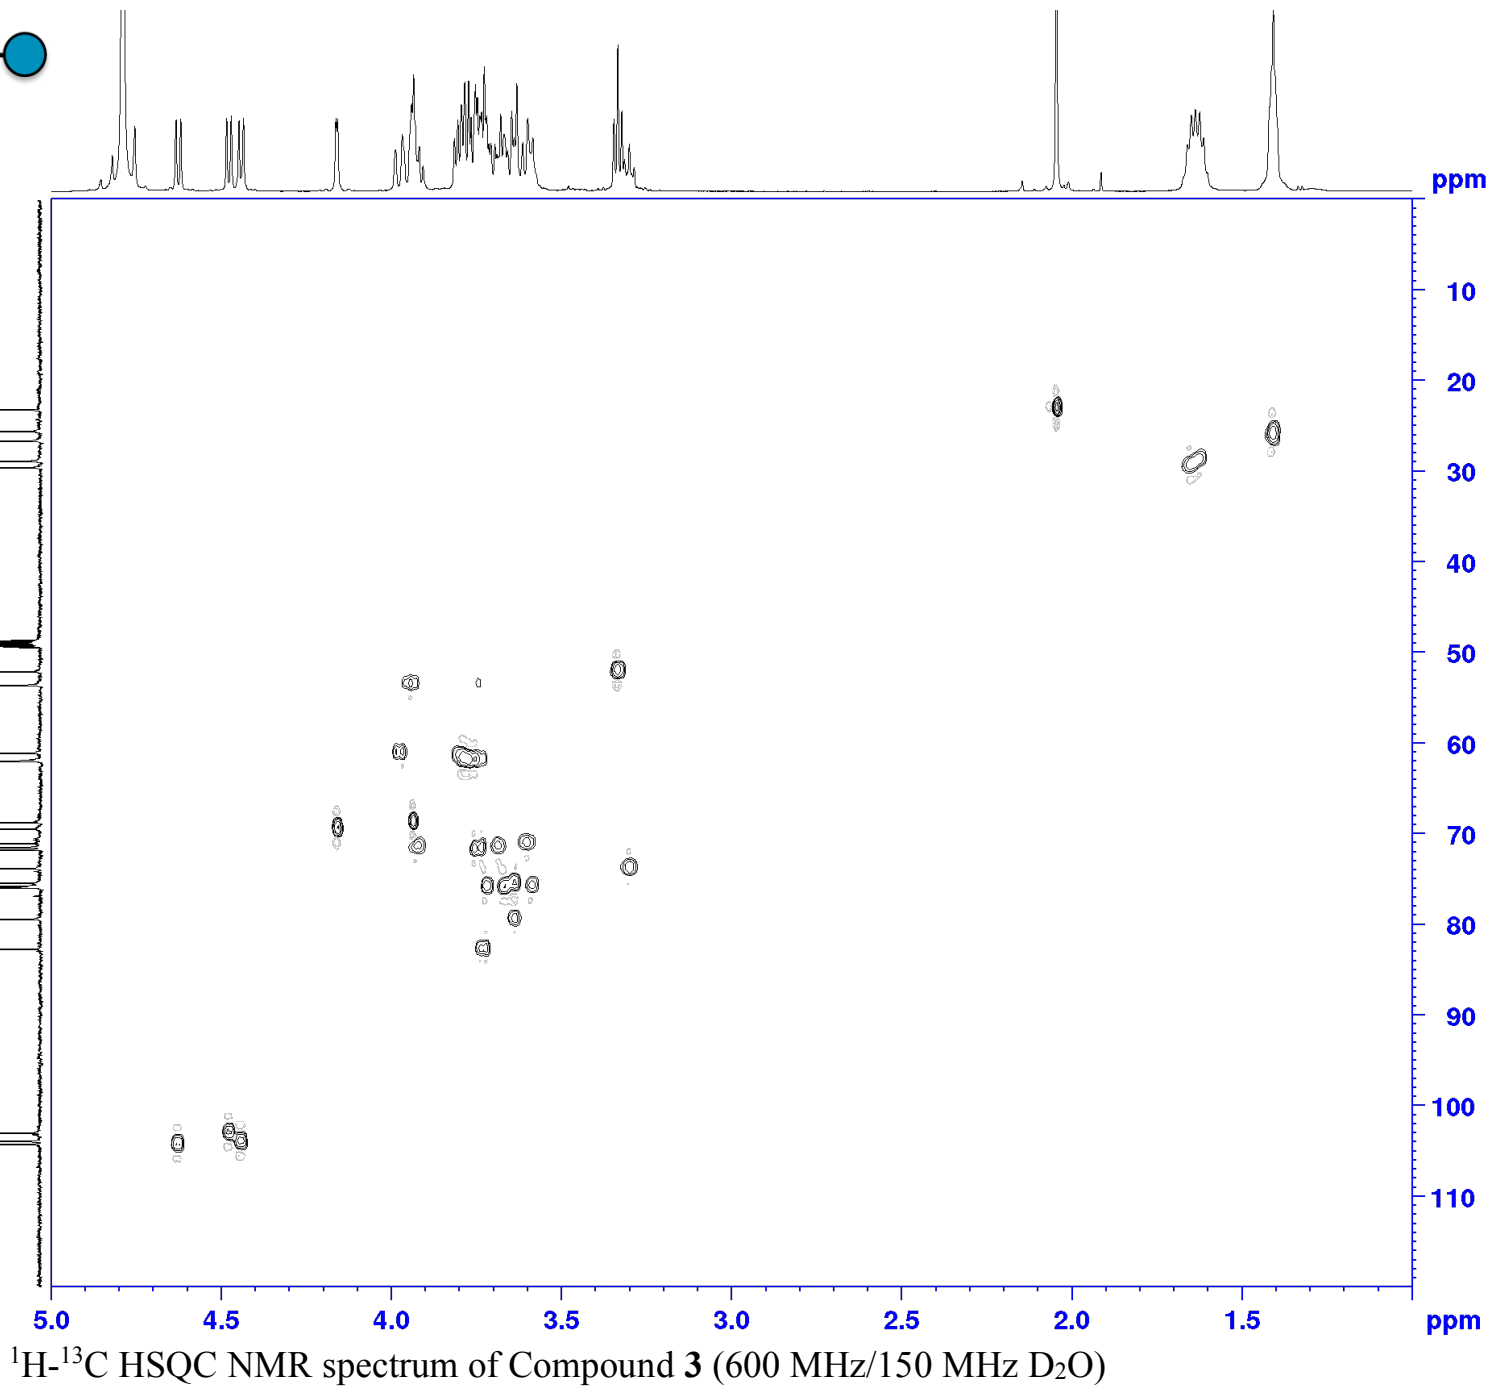

$^1\text{H}$ - $^{13}\text{C}$  HSQC NMR spectrum of Compound 3 (600 MHz/150 MHz  $\text{D}_2\text{O}$ )

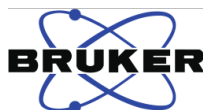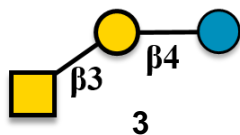

THK-0-GAA-7

```
Current Data Parameters
NAME      THK-015-170817
EXPNO     13
PROCNO    1

F2 - Acquisition Parameters
Date_     20170821
Time      11.37
INSTRUM   spect
PROBHD    5 mm QNP 1H/1
PULPROG   hmbcpgpndqf
TD         2048
SOLVENT   CDCl3
NS         32
DS         0
SWH        6009.615 Hz
FIDRES     2.934382 Hz
AQ         0.1703936 sec
RG         32768
DM         83.200 usec
DE         6.00 usec
TE         301.4 K
CNST2     145.000000
CNST13    12.000000
d0         0.00000300 sec
d1         1.20000005 sec
d2         0.00344828 sec
d4         0.04166667 sec
d16        0.00050000 sec
INVO      0.00001661 sec
MCREST    0 sec
MCWRR     1.20000005 sec

----- CHANNEL f1 -----
NUC1       1H
P1         11.70 usec
P2         23.40 usec
PL1        -2.00 dB
SFO1       598.4028150 MHz

----- CHANNEL f2 -----
NUC2       13C
P3         12.00 usec
PL2         0 dB
SFO2       150.4813421 MHz

----- GRADIENT CHANNEL -----
GPNAM[1]   SINE.100
GPNAM[2]   SINE.100
GPNAM[3]   SINE.100
GPX1       0 %
GPX2       0 %
GPX3       0 %
GPY1       0 %
GPY2       0 %
GPY3       0 %
GPZ1       50.00 %
GPZ2       30.00 %
GPZ3       40.10 %
Pl6        1000.00 usec

F1 - Acquisition parameters
TD         256
SFO1       150.4813 MHz
FIDRES     235.139204 Hz
SW         200.010 ppm
FhMODE     QF

F2 - Processing parameters
SI         4096
SF         598.3999410 MHz
WDW        QSINE
SSB        2
LB         0 Hz
GB         0
PC         1.00

F1 - Processing parameters
SI         512
MC2        QF
SF         150.4676534 MHz
WDW        SINE
SSB        0
LB         0 Hz
GB         0
```

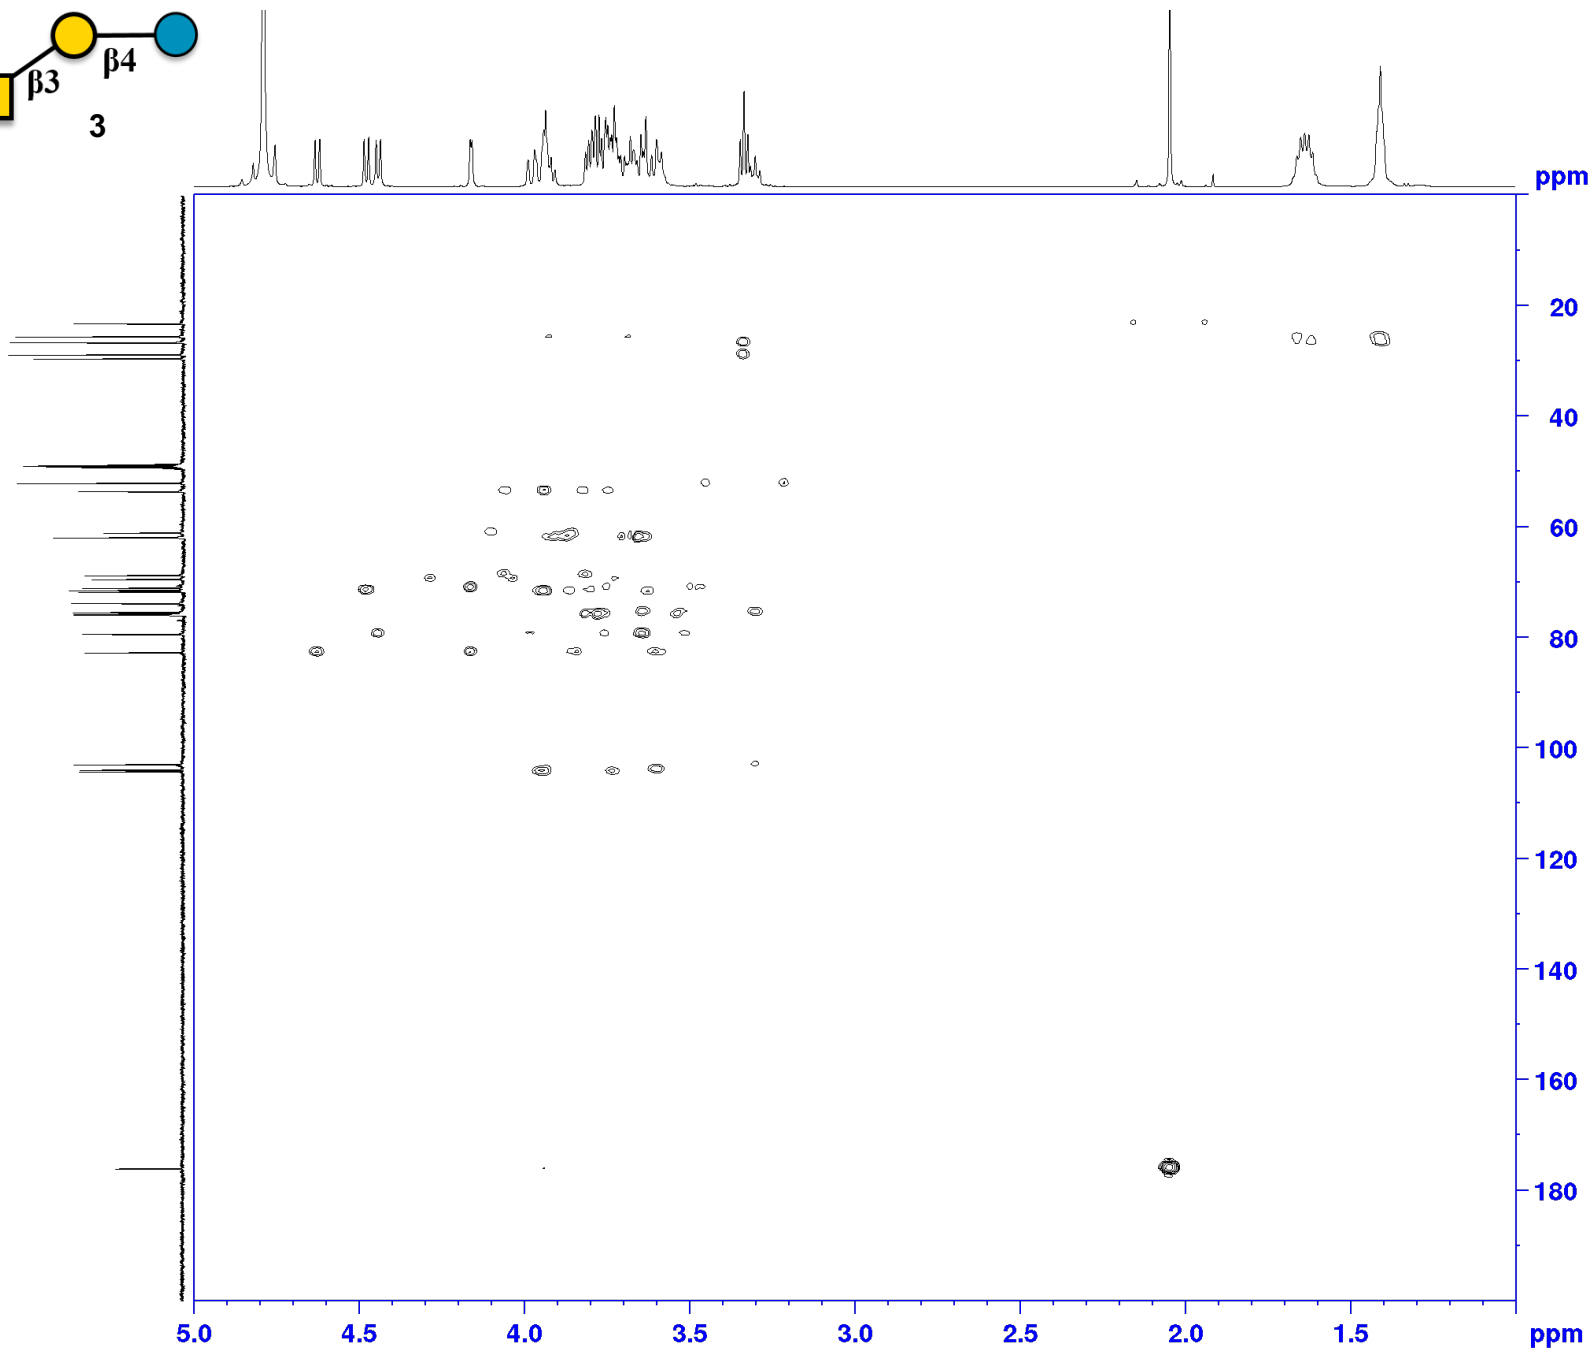

$^1\text{H}$ - $^{13}\text{C}$  HMBC NMR spectrum of Compound 3 (600 MHz/150 MHz  $\text{D}_2\text{O}$ )

THK-3A-GAA7

Current Data Parameters  
NAME THK-041-tetra-180116  
EXPNO 1  
PROCNO 1

F2 - Acquisition Parameters  
Date\_ 20180119  
Time 0.37  
INSTRUM spect  
PROBHD 5 mm QNP 1H/1  
PULPROG zg  
TD 32768  
SOLVENT D2O  
NS 1  
DS 0  
SWH 8389.262 Hz  
FIDRES 0.256020 Hz  
AQ 1.9529728 sec  
RG 512  
DW 59.600 usec  
DE 6.50 usec  
TE 296.8 K  
D1 2.00000000 sec  
MCREST 0 sec  
MCWRK 0.01500000 sec

==== CHANNEL f1 =====  
NUC1 1H  
P1 10.00 usec  
PL1 -1.00 dB  
SFO1 598.3028139 MHz

F2 - Processing parameters  
SI 32768  
SF 598.2999482 MHz  
WDW no  
SSB 0  
LB 0 Hz  
GB 0  
PC 2.00

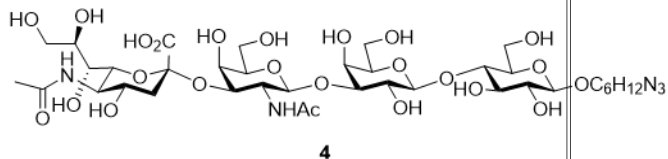

4.7898  
4.7150  
4.7008  
4.4546  
4.4412  
4.4308  
4.4176  
4.1770  
4.1721  
4.1588  
4.1539  
4.1309  
4.1256  
3.9605  
3.9424  
3.9270  
3.9069  
3.9019  
3.8955  
3.8904  
3.8783  
3.8666  
3.8619  
3.8584  
3.8417  
3.8381  
3.7897  
3.7811  
3.7694  
3.7597  
3.7529  
3.7399  
3.7357  
3.7300  
3.7224  
3.7140  
3.7082  
3.6921  
3.6861  
3.6766  
3.6653  
3.6595  
3.6542  
3.6486  
3.6404  
3.6305  
3.6177  
3.6144  
3.6016  
3.5899  
3.5755  
3.5594  
3.4610  
3.4583  
3.4438  
3.4410  
3.4172  
3.3056  
3.2941  
3.2846  
3.2693  
3.2594  
3.2556  
2.8890  
2.6813  
2.6682  
2.6606  
2.0634  
2.0142  
1.6329  
1.6205  
1.6064  
1.6008  
1.5948  
1.5821  
1.3802  
1.3842  
1.3785  
1.3730  
1.3679

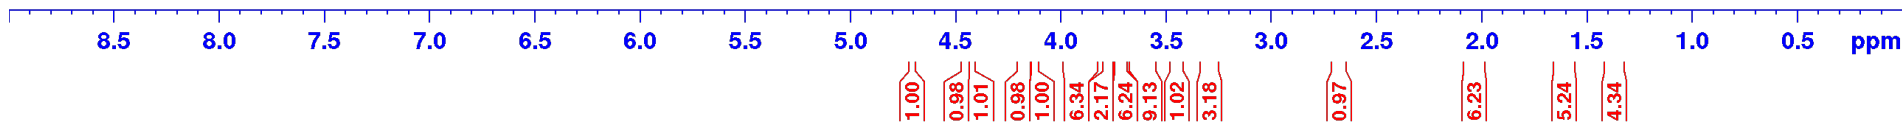

<sup>1</sup>H NMR spectrum of Compound 4 (600 MHz D<sub>2</sub>O)

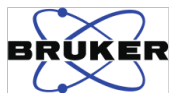

THK-3A-GAA-7

Current Data Parameters  
NAME THK-041-tetra-180116  
EXPNO 2  
PROCNO 1

F2 - Acquisition Parameters  
Date\_ 20180119  
Time 0.42  
INSTRUM spect  
PROBHD 5 mm QNP 1H/1  
PULPROG zgpg3  
TD 32768  
SOLVENT D2O  
NS 565  
DS 0  
SWH 45045.047 Hz  
FIDRES 1.374666 Hz  
AQ 0.3637248 sec  
RG 4096  
DW 11.100 usec  
DE 6.50 usec  
TE 296.9 K  
DL 3.5000000 sec  
dL1 0.03000000 sec  
DELTA 3.40000010 sec  
MCREST 0 sec  
MCWRE 0.01500000 sec

----- CHANNEL f1 -----  
NUC1 13C  
P1 4.80 usec  
PL1 0 dB  
SFO1 150.4592037 MHz

----- CHANNEL f2 -----  
CPDPRG2 waltz16  
NUC2 1H  
PCPD2 92.00 usec  
PL2 120.00 dB  
PL12 5.50 dB  
PL13 9.00 dB  
SFO2 598.3029915 MHz

F2 - Processing parameters  
SI 65536  
SF 150.4425029 MHz  
WDW EM  
SSB 0  
LB 3.00 Hz  
GB 0  
PC 1.00

176.156  
175.857  
175.080

103.882  
103.791  
103.010  
100.443

82.745  
79.404  
75.860  
75.725  
75.432  
73.776  
72.639  
71.457  
70.978  
69.390  
69.251  
69.038  
67.936  
63.581  
61.978  
61.939  
61.056  
52.882  
52.087  
49.430  
49.285  
49.143  
48.998  
48.854  
48.710  
48.565  
40.691  
29.569  
28.863  
26.643  
25.583  
23.367  
22.932

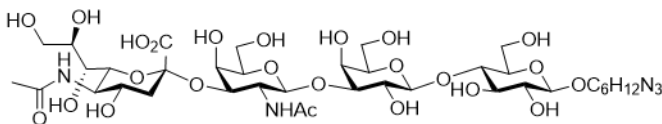

4

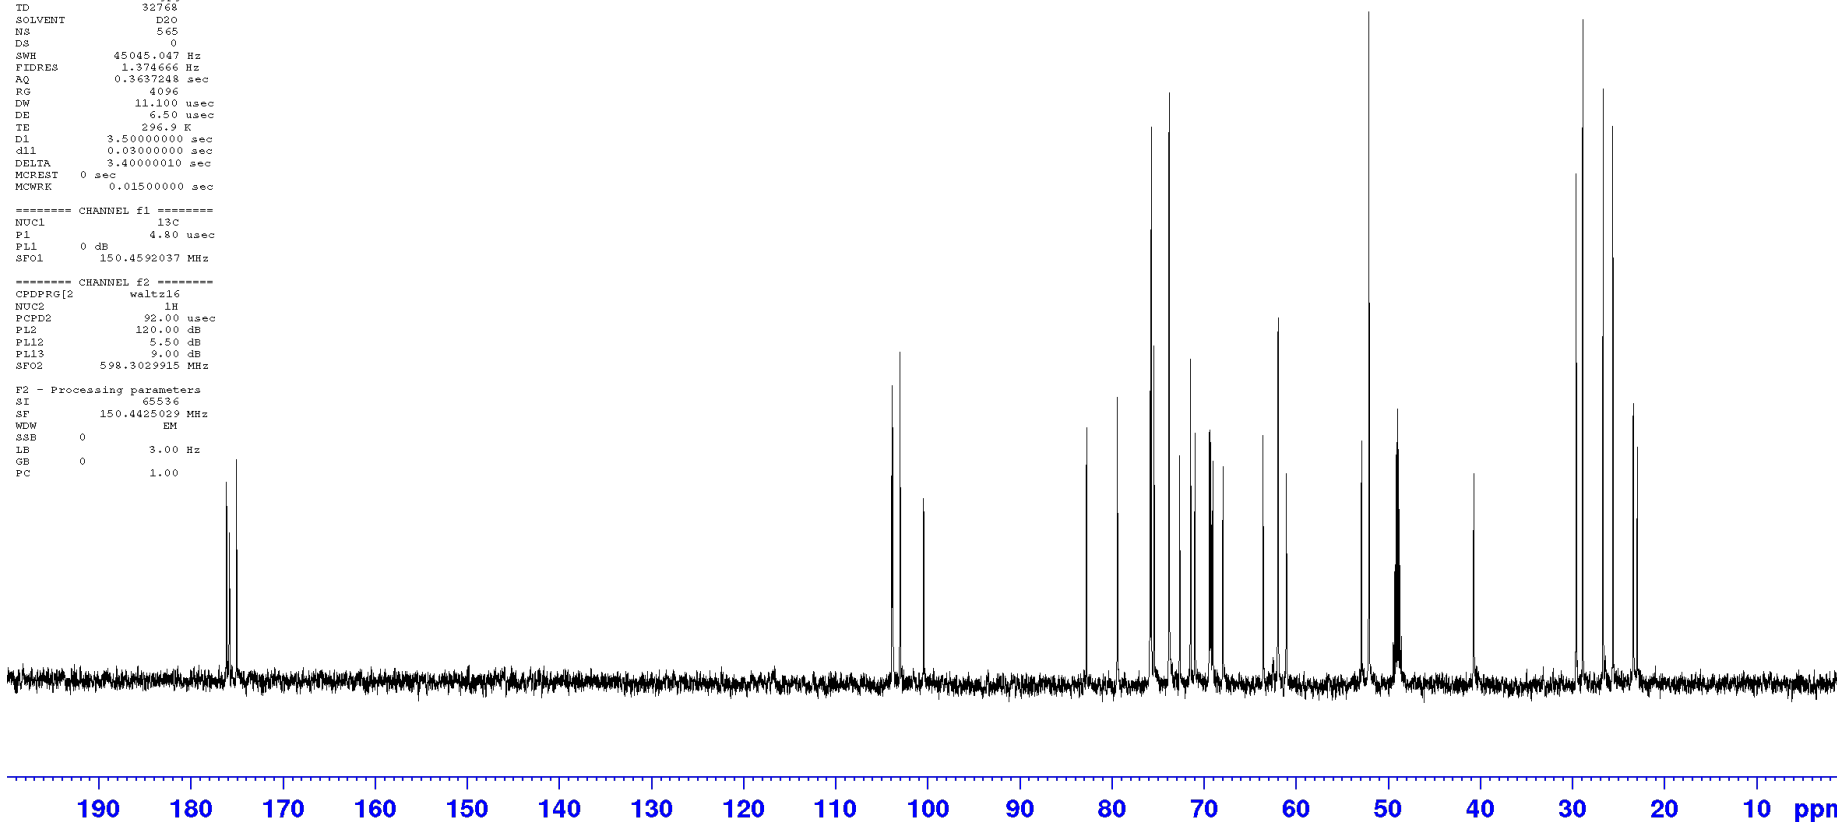

<sup>13</sup>C NMR spectrum of Compound 4 (150 MHz D<sub>2</sub>O)

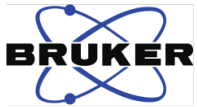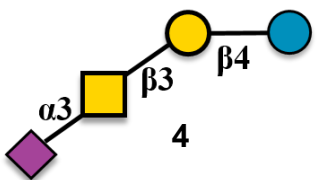

THK-3A-GAA-7

Current Data Parameters  
NAME THK-041-tetra-180116  
EXPNO 11  
PROCNO 1

F2 - Acquisition Parameters  
Date\_ 20180119  
Time 3.13  
INSTRUM spect  
PROBHD 5 mm QNP 1H/1  
PULPROG cosyprgf  
TD 2048  
SOLVENT CDCl3  
NS 8  
DS 0  
SWH 6009.615 Hz  
FIDRES 2.934382 Hz  
AQ 0.1703936 sec  
RG 64  
DW 83.200 usec  
DE 6.50 usec  
TE 296.9 K  
d0 0.00000300 sec  
d1 1.50000000 sec  
d11 0.03000000 sec  
d12 0.00002000 sec  
d13 0.00000400 sec  
IN0 0.00016640 sec  
MCREST 0 sec  
MCWRK 0.03000000 sec

==== CHANNEL f1 =====  
NUC1 1H  
P0 10.00 usec  
P1 11.70 usec  
PL1 -2.00 dB  
PL9 55.00 dB  
SFO1 598.3028142 MHz

F1 - Acquisition parameters  
TD 256  
SFO1 598.3028 MHz  
FIDRES 46.950119 Hz  
SW 10.044 ppm  
FhMODE QF

F2 - Processing parameters  
SI 4096  
SF 598.2999450 MHz  
WDW QSINE  
SSB 0  
LB 0 Hz  
GB 0  
PC 1.00

F1 - Processing parameters  
SI 512  
MC2 QF  
SF 598.2999482 MHz  
WDW QSINE  
SSB 0  
LB 0 Hz  
GB 0

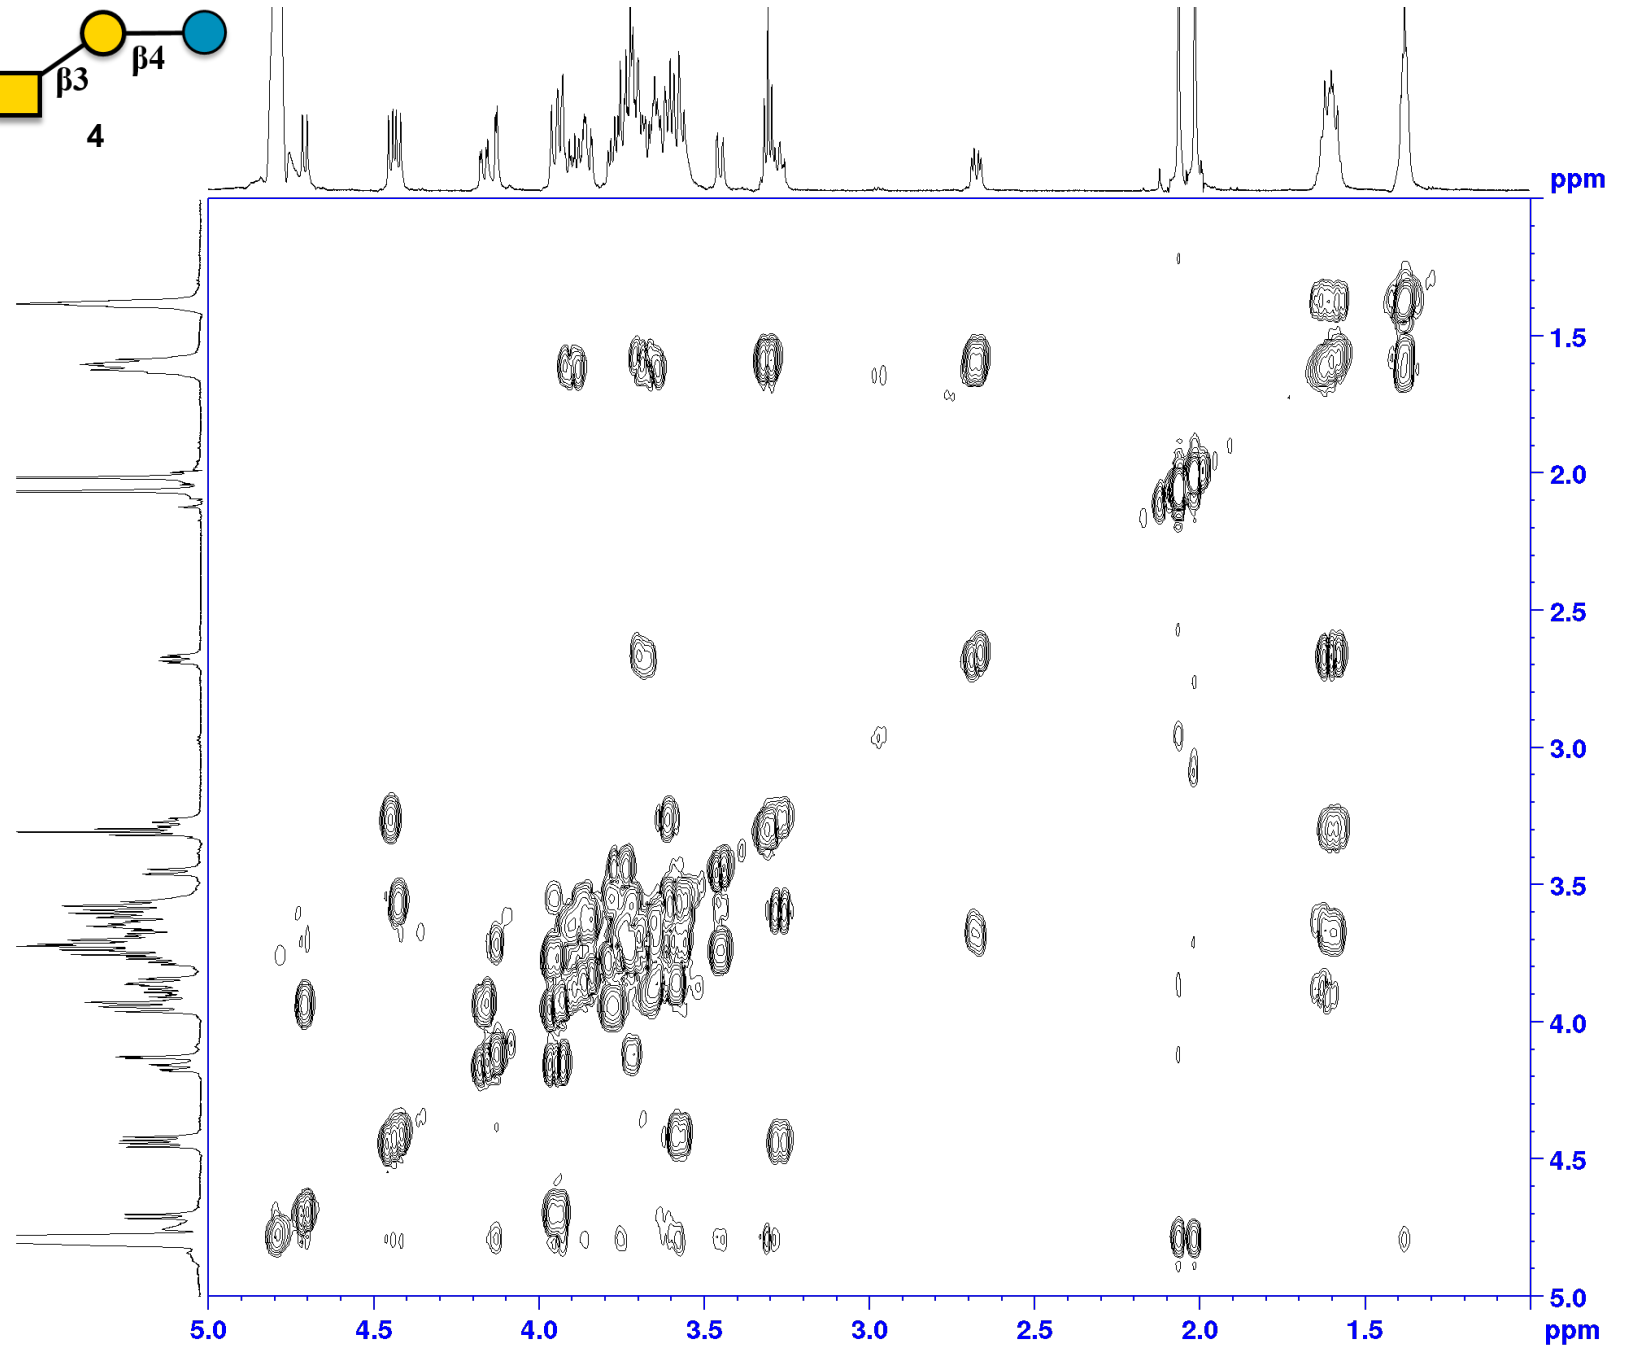

$^1\text{H}$ - $^1\text{H}$  COSY NMR spectrum of Compound 4 (600 MHz  $\text{D}_2\text{O}$ )



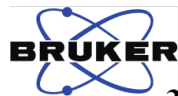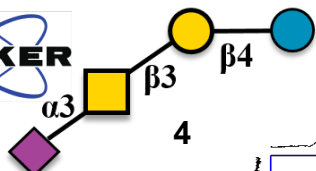

THK-3A-GAA-7

Current Data Parameters  
NAME THK-041-tetra-180116  
EXPNO 12  
PROCNO 1

F2 - Acquisition Parameters  
Date\_ 20180119  
Time 6.07  
INSTRUM spect  
PROBHD 5 mm QNP 1H/1  
PULPROG zgpg30psi  
TD 2048  
SOLVENT cdcl3  
NS 8  
DS 8  
SWH 6009.615 Hz  
FIDRES 2.934582 Hz  
AQ 0.1703936 sec  
RG 16384  
DW 83.200 usec  
DE 6.50 usec  
TE 297.4 K  
CST2 145.0000000  
d0 0.00000300 sec  
d1 1.20000005 sec  
d4 0.0012414 sec  
d11 0.03000000 sec  
d13 0.00000400 sec  
d16 0.00000000 sec  
D24 0.00089000 sec  
DELTA 0.00158400 sec  
DELTA1 0.00150800 sec  
INO 0.00001583 sec  
MORFST 0 sec  
MORPR 0.20000041 sec  
SIUNT 0

\*\*\*\*\* CHANNEL f1 \*\*\*\*\*  
NUC1 1H  
P1 14.00 usec  
p2 28.00 usec  
P28 1000.00 usec  
PL1 -2.00 dB  
SFO1 598.3028142 MHz

\*\*\*\*\* CHANNEL f2 \*\*\*\*\*  
CPDPRG2 gexp  
NUC2 13C  
P3 10.00 usec  
p4 20.00 usec  
PCPD2 70.00 usec  
PL2 0 dB  
PL12 20.00 dB  
SFO2 150.4546904 MHz

\*\*\*\*\* GRADIENT CHANNEL \*\*\*\*\*  
GENAM(1) SINE.100  
GENAM(2) SINE.100  
GPX1 0 %  
GPX2 0 %  
GPY1 0 %  
GPY2 0 %  
GPE1 80.00 %  
GPE2 20.10 %  
PL6 1000.00 usec

F1 - Acquisition parameters  
TD 256  
SFO1 150.4547 MHz  
FIDRES 246.840439 Hz  
SF 210.001 ppm  
EnMODE Echo-Antiecho

F2 - Processing parameters  
SI 2048  
SF 598.2999550 MHz  
WDM QSINE  
SSB 4  
LB 0 Hz  
GB 0  
PC 1.00

F1 - Processing parameters  
SI 512  
MC2 echo-antiecho  
SF 150.4425029 MHz  
WDM QSINE  
SSB 4  
LB 0 Hz  
GB 0

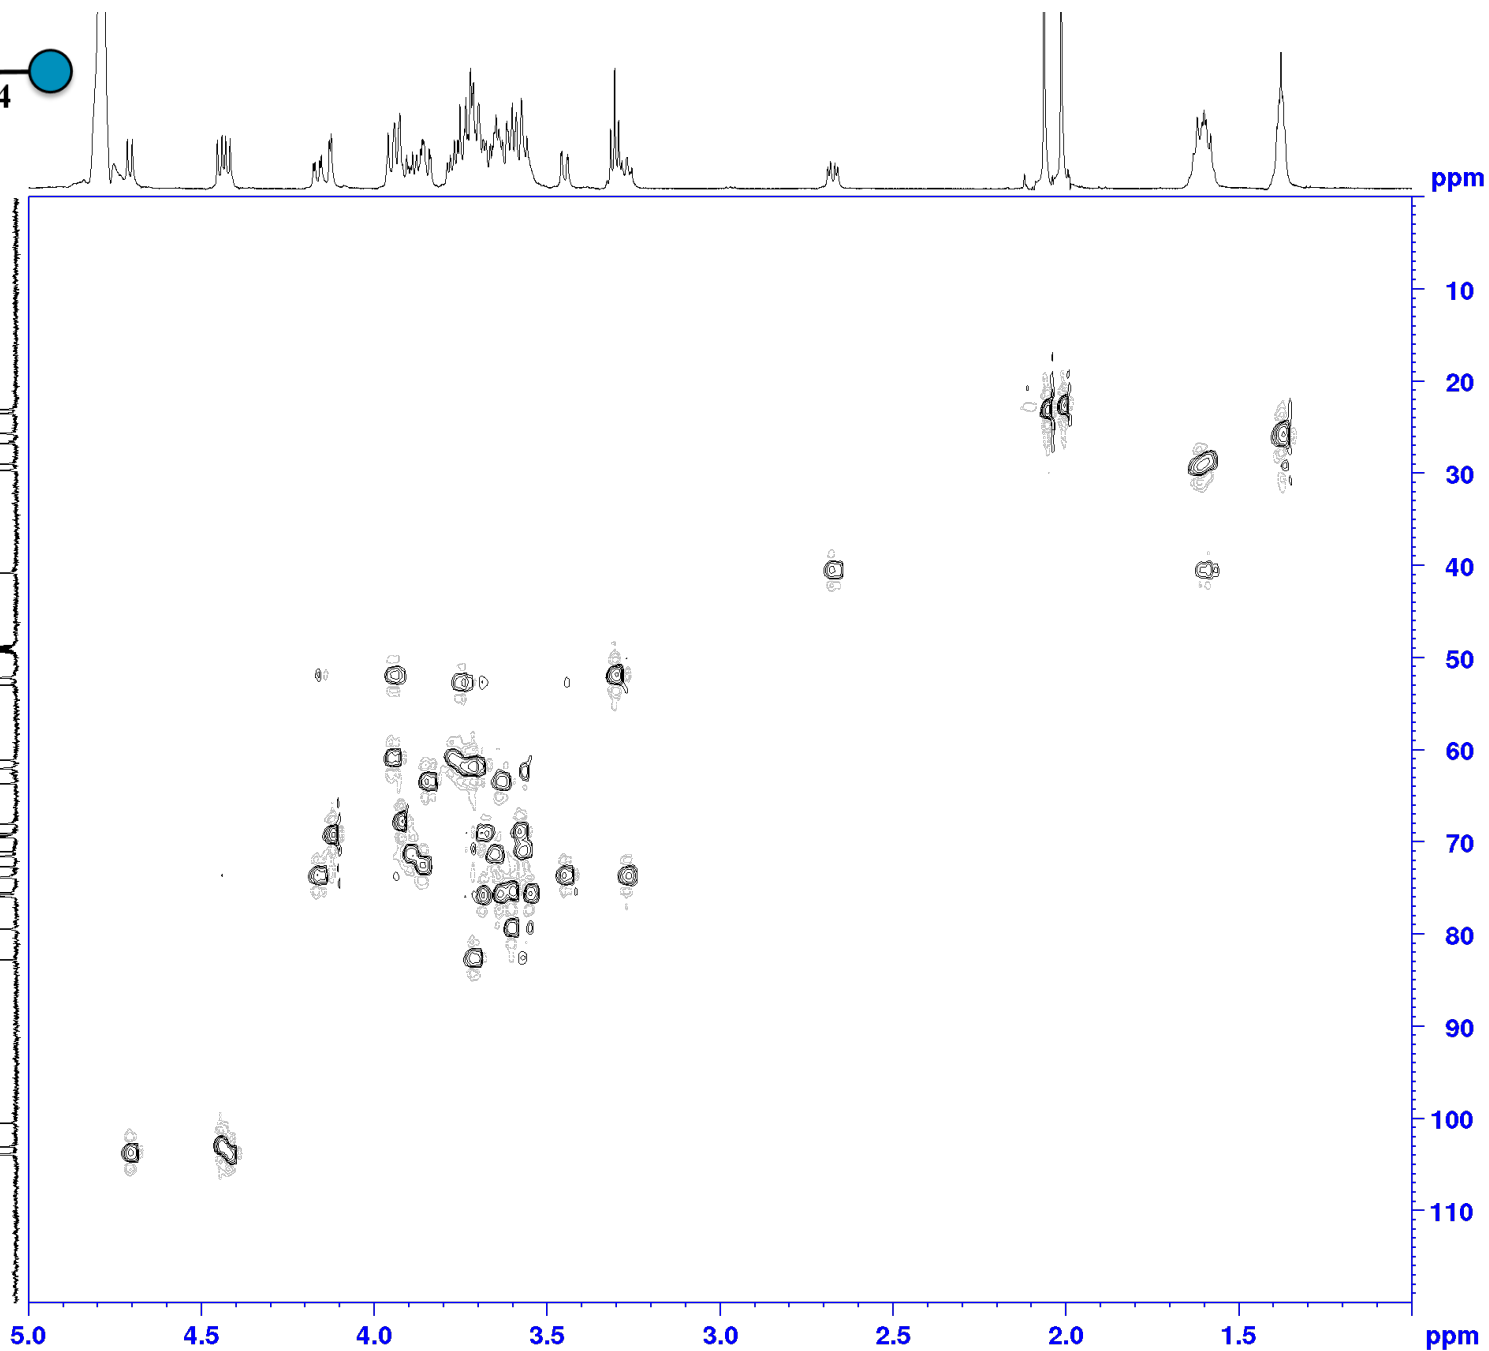

$^1\text{H}$ - $^{13}\text{C}$  HSQC NMR spectrum of Compound 4 (600 MHz/150 MHz  $\text{D}_2\text{O}$ )

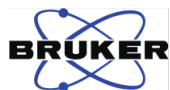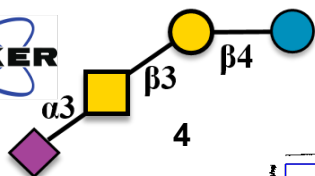

THK-3A-GAA-7

Current Data Parameters  
NAME THK-041-tetra-180116  
EXPNO 13  
PROCNO 1

F2 - Acquisition Parameters  
Date\_ 20180119  
Time 6.55  
INSTRUM spect  
PROBHD 5 mm QNP 1H/1  
PULPROG hmcgplpndgf  
TD 2048  
SOLVENT CDCl3  
NS 8  
DS 0  
SWH 6009.615 Hz  
FIDRES 2.934382 Hz  
AQ 0.1703936 sec  
RG 32768  
DM 83.200 usec  
DE 6.00 usec  
TE 298.0 K  
CHST2 145.0000000  
CHST13 12.0000000  
d0 0.00000300 sec  
D1 1.20000005 sec  
d2 0.00344828 sec  
d5 0.04166667 sec  
D16 0.00050000 sec  
IN0 0.00001661 sec  
MCREST 0 sec  
MCWEX 1.20000005 sec

==== CHANNEL f1 =====  
NUC1 1H  
F1 14.00 usec  
P2 28.00 usec  
PL1 -2.00 dB  
SFO1 598.3028142 MHz

==== CHANNEL f2 =====  
NUC2 13C  
F2 12.00 usec  
PL2 0 dB  
SFO2 150.4561948 MHz

==== GRADIENT CHANNEL =====  
GENAM(1) SINE.100  
GENAM(2) SINE.100  
GENAM(3) SINE.100  
GPX1 0 %  
GPX2 0 %  
GPX3 0 %  
GPY1 0 %  
GPY2 0 %  
GPY3 0 %  
GPE1 50.00 %  
GPE2 30.00 %  
GPE3 40.10 %  
P16 1000.00 usec

F1 - Acquisition parameters  
TD 256  
SFO1 150.4562 MHz  
FIDRES 235.139206 Hz  
SW 200.044 ppm  
FAMODE QF

F2 - Processing parameters  
SI 4096  
SF 598.299400 MHz  
WDW QSINE  
SSB 2  
LB 0 Hz  
GB 0  
PC 1.00

F1 - Processing parameters  
SI 512  
M2 QF  
SF 150.4425029 MHz  
WDW SINE  
SSB 0  
LB 0 Hz  
GB 0

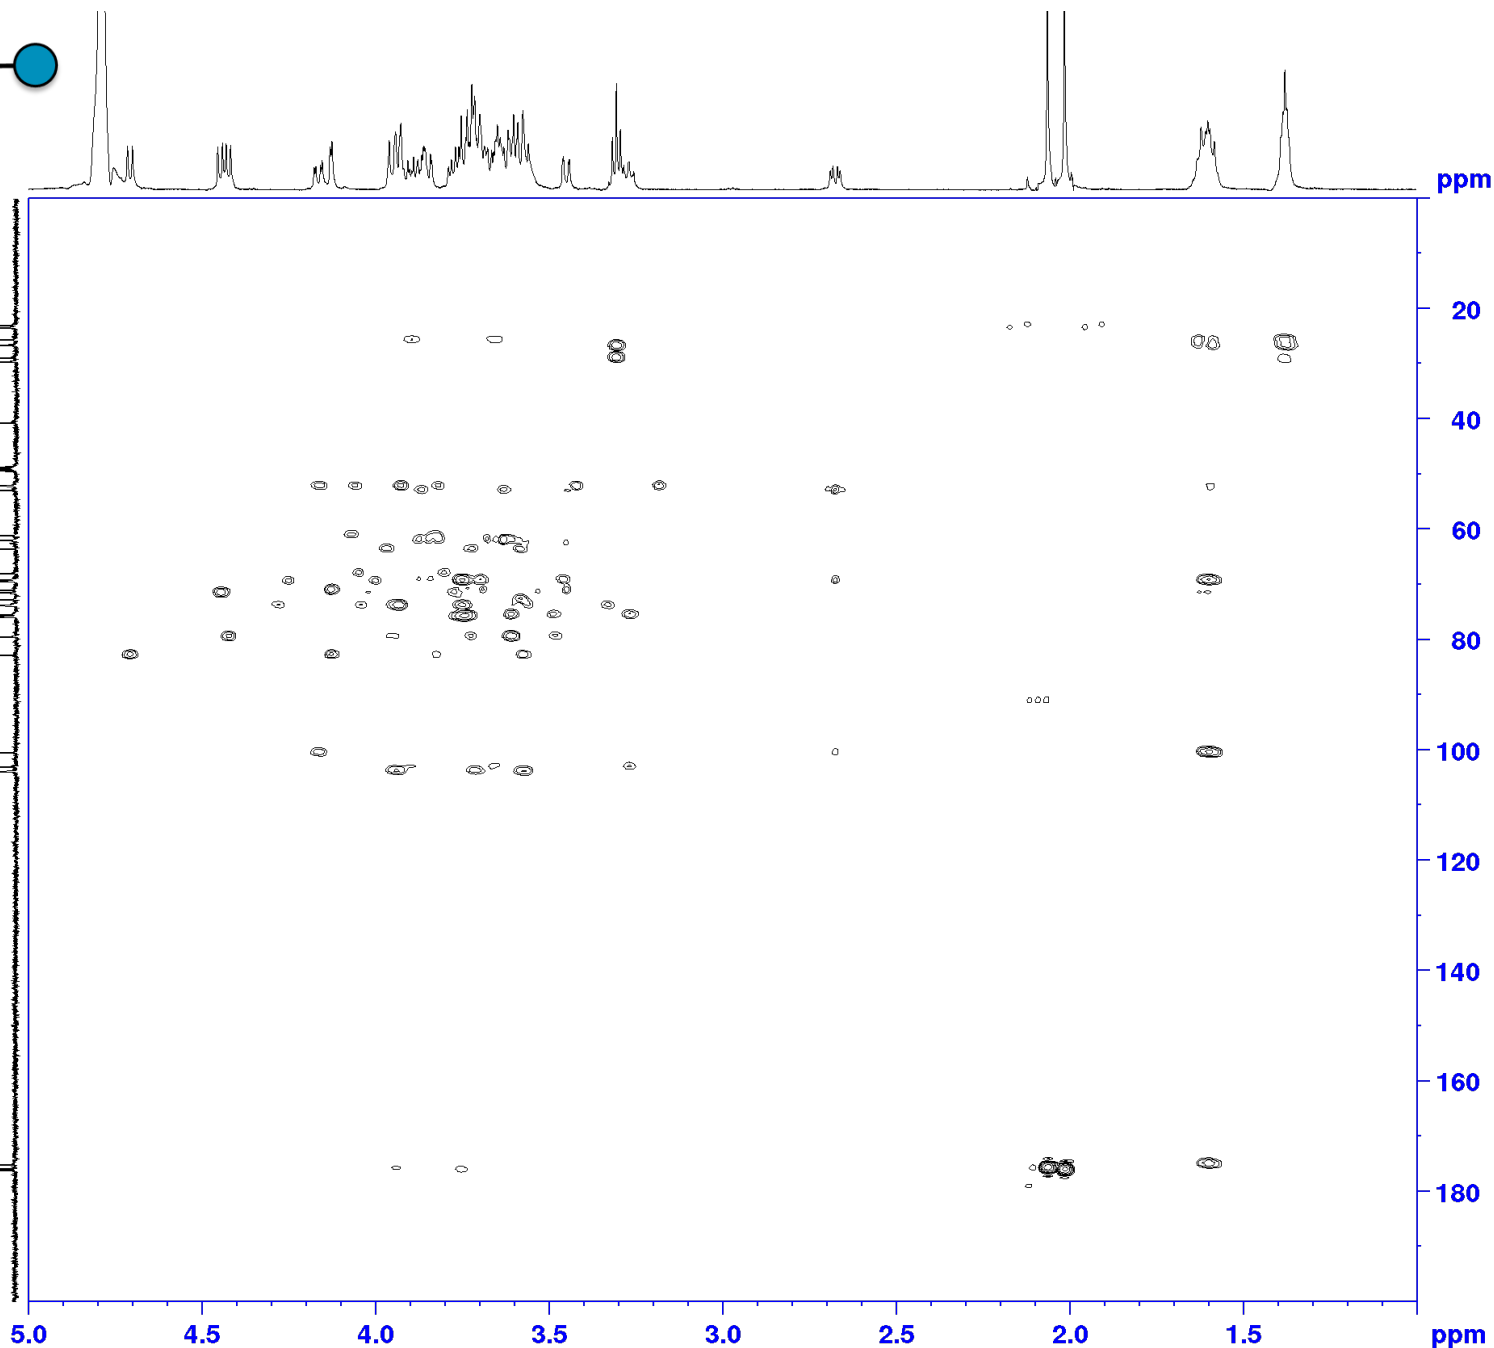

$^1\text{H}$ - $^{13}\text{C}$  HMBC NMR spectrum of Compound 4 (600 MHz/150 MHz  $\text{D}_2\text{O}$ )

4.7898  
4.6997  
4.6884  
4.4690  
4.4586  
4.4391  
4.4299  
4.2656  
4.2688  
4.2353  
4.2305  
4.1433  
4.1380  
4.1106  
4.0124  
4.0077  
3.9974  
3.9921  
3.8971  
3.9778  
3.9688  
3.9544  
3.9361  
3.9321  
3.9206  
3.9156  
3.9092  
3.8044  
3.8890  
3.8722  
3.8647  
3.8538  
3.8463  
3.8373  
3.8296  
3.8227  
3.8019  
3.7935  
3.7869  
3.7812  
3.7738  
3.7694  
3.7646  
3.7568  
3.7450  
3.7393  
3.7326  
3.7181  
3.7133  
3.7009  
3.6919  
3.6804  
3.6744  
3.6688  
3.6635  
3.6522  
3.6437  
3.6406  
3.6302  
3.6212  
3.6160  
3.6065  
3.6011  
3.5874  
3.5844  
3.5765  
3.5713  
3.5596  
3.5463  
3.5227  
3.5172  
3.5109  
3.5038  
3.4977  
3.4932  
3.4817  
3.4731  
3.4614  
3.3307  
3.3191  
3.3075  
3.3050  
3.3020  
3.3012  
3.2983  
3.2904  
3.2841  
3.2772  
3.2694  
2.6092  
2.6019  
2.5884  
2.5819  
2.0674  
1.6599  
1.6404  
1.6346  
1.6211  
1.6089  
1.5971  
1.5857  
1.4050  
1.3989  
1.3930  
1.3873  
1.3813

THK-GAA7-3GM

Current Data Parameters  
NAME THK-136-GcMetetra  
EXPNO 1  
PROCNO 1

F2 - Acquisition Parameters  
Date\_ 20190430  
Time 7.49  
INSTRUM spect  
PROBHD 5 mm QNP 1H/1  
PULPROG zg  
TD 32768  
SOLVENT H2O+D2O  
NS 128  
DS 0  
SWH 9541.984 Hz  
FIDRES 0.291198 Hz  
AQ 1.7170432 sec  
RG 1024  
DW 52.400 usec  
DE 6.50 usec  
TE 0 K  
D1 2.00000000 sec  
MCREST 0 sec  
MCWRK 0.01500000 sec

==== CHANNEL f1 =====  
NUC1 1H  
P1 10.00 usec  
PL1 -4.00 dB  
SFO1 598.2028119 MHz

F2 - Processing parameters  
SI 32768  
SF 598.1999477 MHz  
WDW nc  
SSB 0  
LB 0 Hz  
GB 0  
PC 2.00

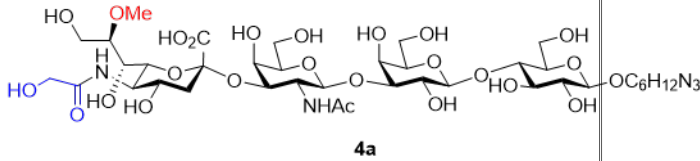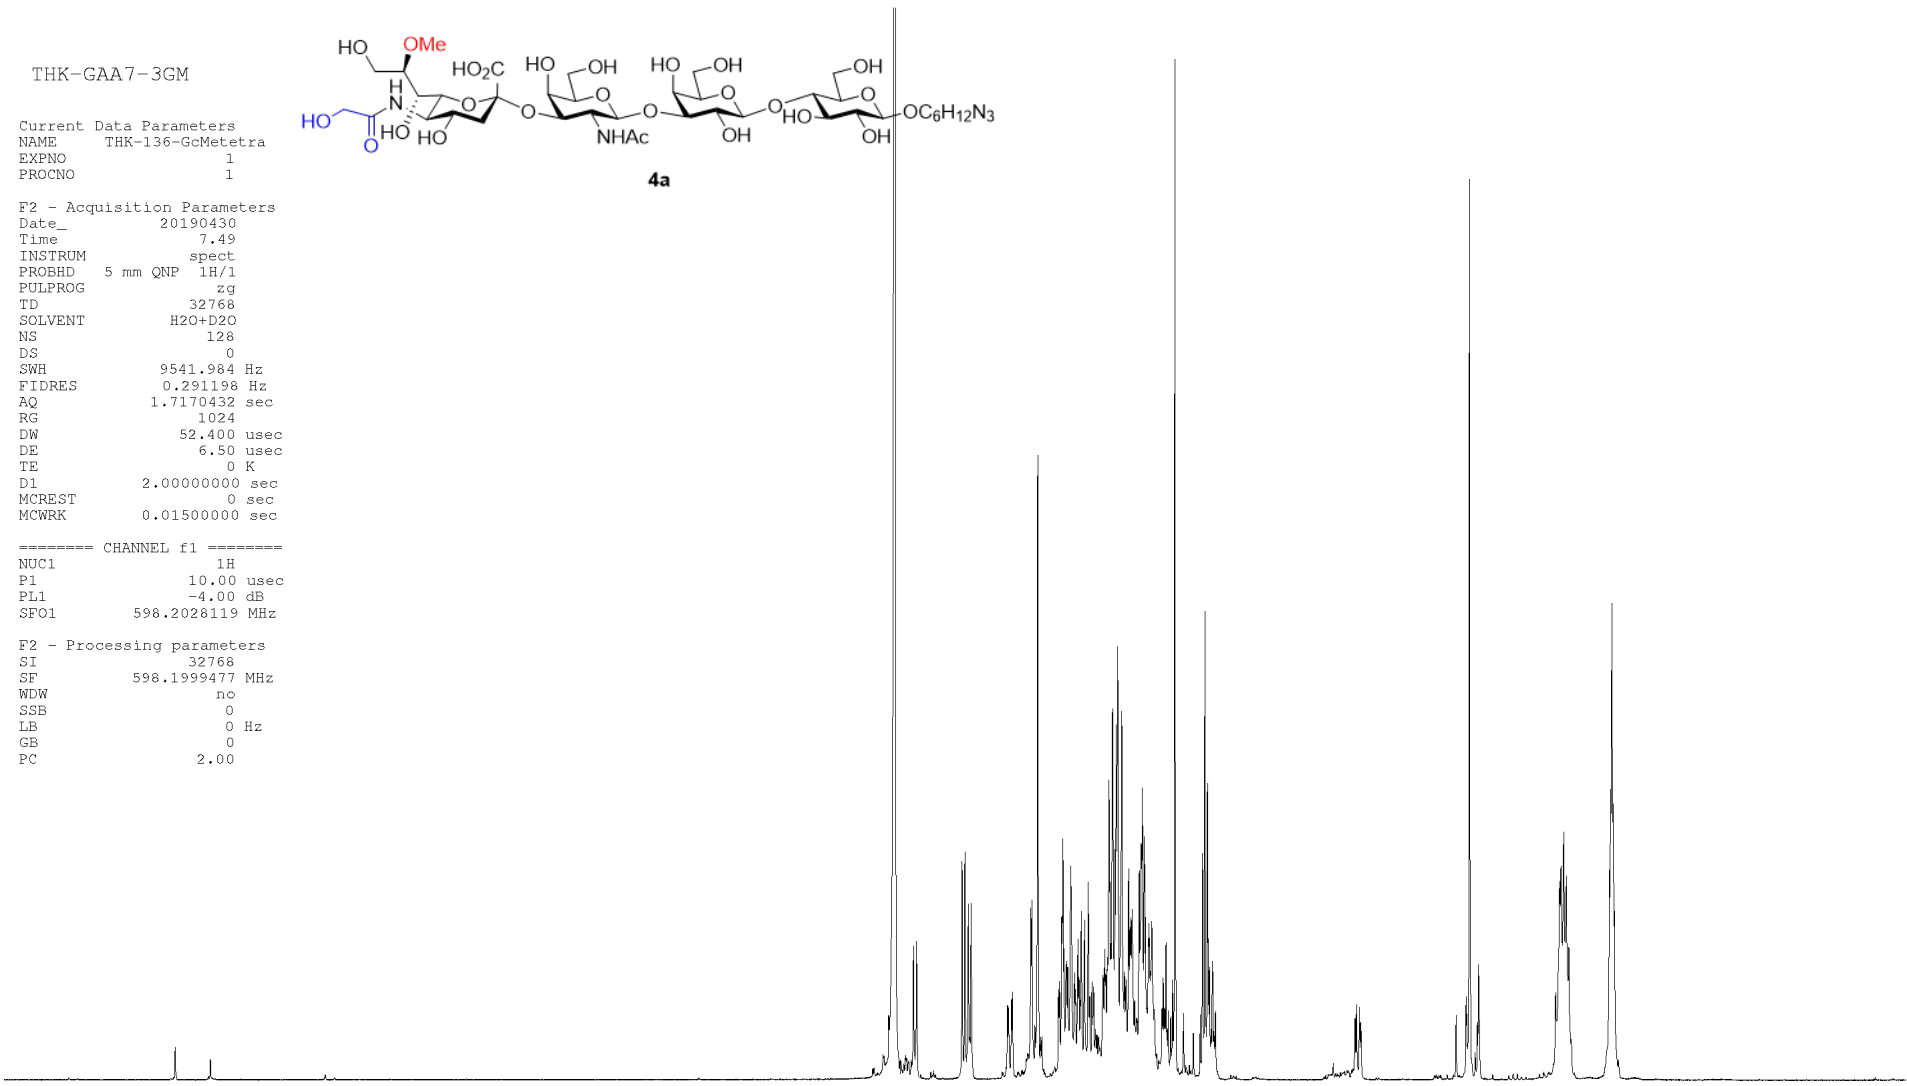

1.04  
1.20  
1.14  
0.91  
1.05  
2.16  
2.05  
2.22  
1.31  
1.28  
1.36  
1.29  
2.47  
2.38  
3.21  
1.24  
2.39  
2.48  
1.33  
2.01  
1.24  
2.40  
1.00  
0.95  
2.99  
5.42  
4.08

<sup>1</sup>H NMR spectrum of Compound 4a (600 MHz D<sub>2</sub>O)

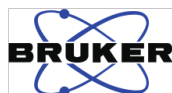

THK-3G-GAA-7

Current Data Parameters  
NAME THK-136-GcMetetra  
EXPNO 2  
PROCNO 1

F2 - Acquisition Parameters  
Date\_ 20190428  
Time 7.53  
INSTRUM spect  
PROBHD 5 mm QNP 1H/1  
PULPROG zgpg  
TD 32768  
SOLVENT D2O  
NS 2048  
DS 0  
SWH 45045.047 Hz  
FIDRES 1.374666 Hz  
AQ 0.3637248 sec  
RG 4096  
DW 11.100 usec  
DE 6.50 usec  
TE 0 K  
D1 3.5000000 sec  
d11 0.0300000 sec  
DELTA 3.4000010 sec  
MCREST 0 sec  
MCWRK 0.0150000 sec

===== CHANNEL f1 =====  
NUC1 13C  
P1 4.80 usec  
PL1 0 dB  
SFO1 150.4340559 MHz

===== CHANNEL f2 =====  
CPDPRG2 waltz16  
NUC2 1H  
PCPD2 92.00 usec  
PL2 120.00 dB  
PL12 3.00 dB  
PL13 5.00 dB  
SFO2 598.2029910 MHz

F2 - Processing parameters  
SI 65536  
SF 150.4173817 MHz  
WDW EM  
SSB 0  
LB 2.00 Hz  
GB 0  
FC 1.00

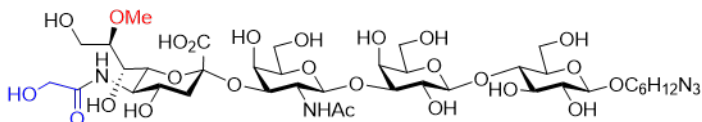

4a

176.713  
175.845  
174.518

104.006  
103.913  
103.006  
100.780  
82.658  
81.298  
79.557  
75.848  
75.709  
75.679  
75.455  
73.805  
73.325  
71.419  
71.021  
69.417  
68.838  
68.187  
68.093  
61.979  
61.904  
61.137  
60.303  
58.327  
52.909  
52.128  
52.095  
49.431  
49.287  
49.143  
48.999  
48.855  
48.710  
48.566  
40.569  
29.544  
28.805  
26.604  
25.546  
23.295

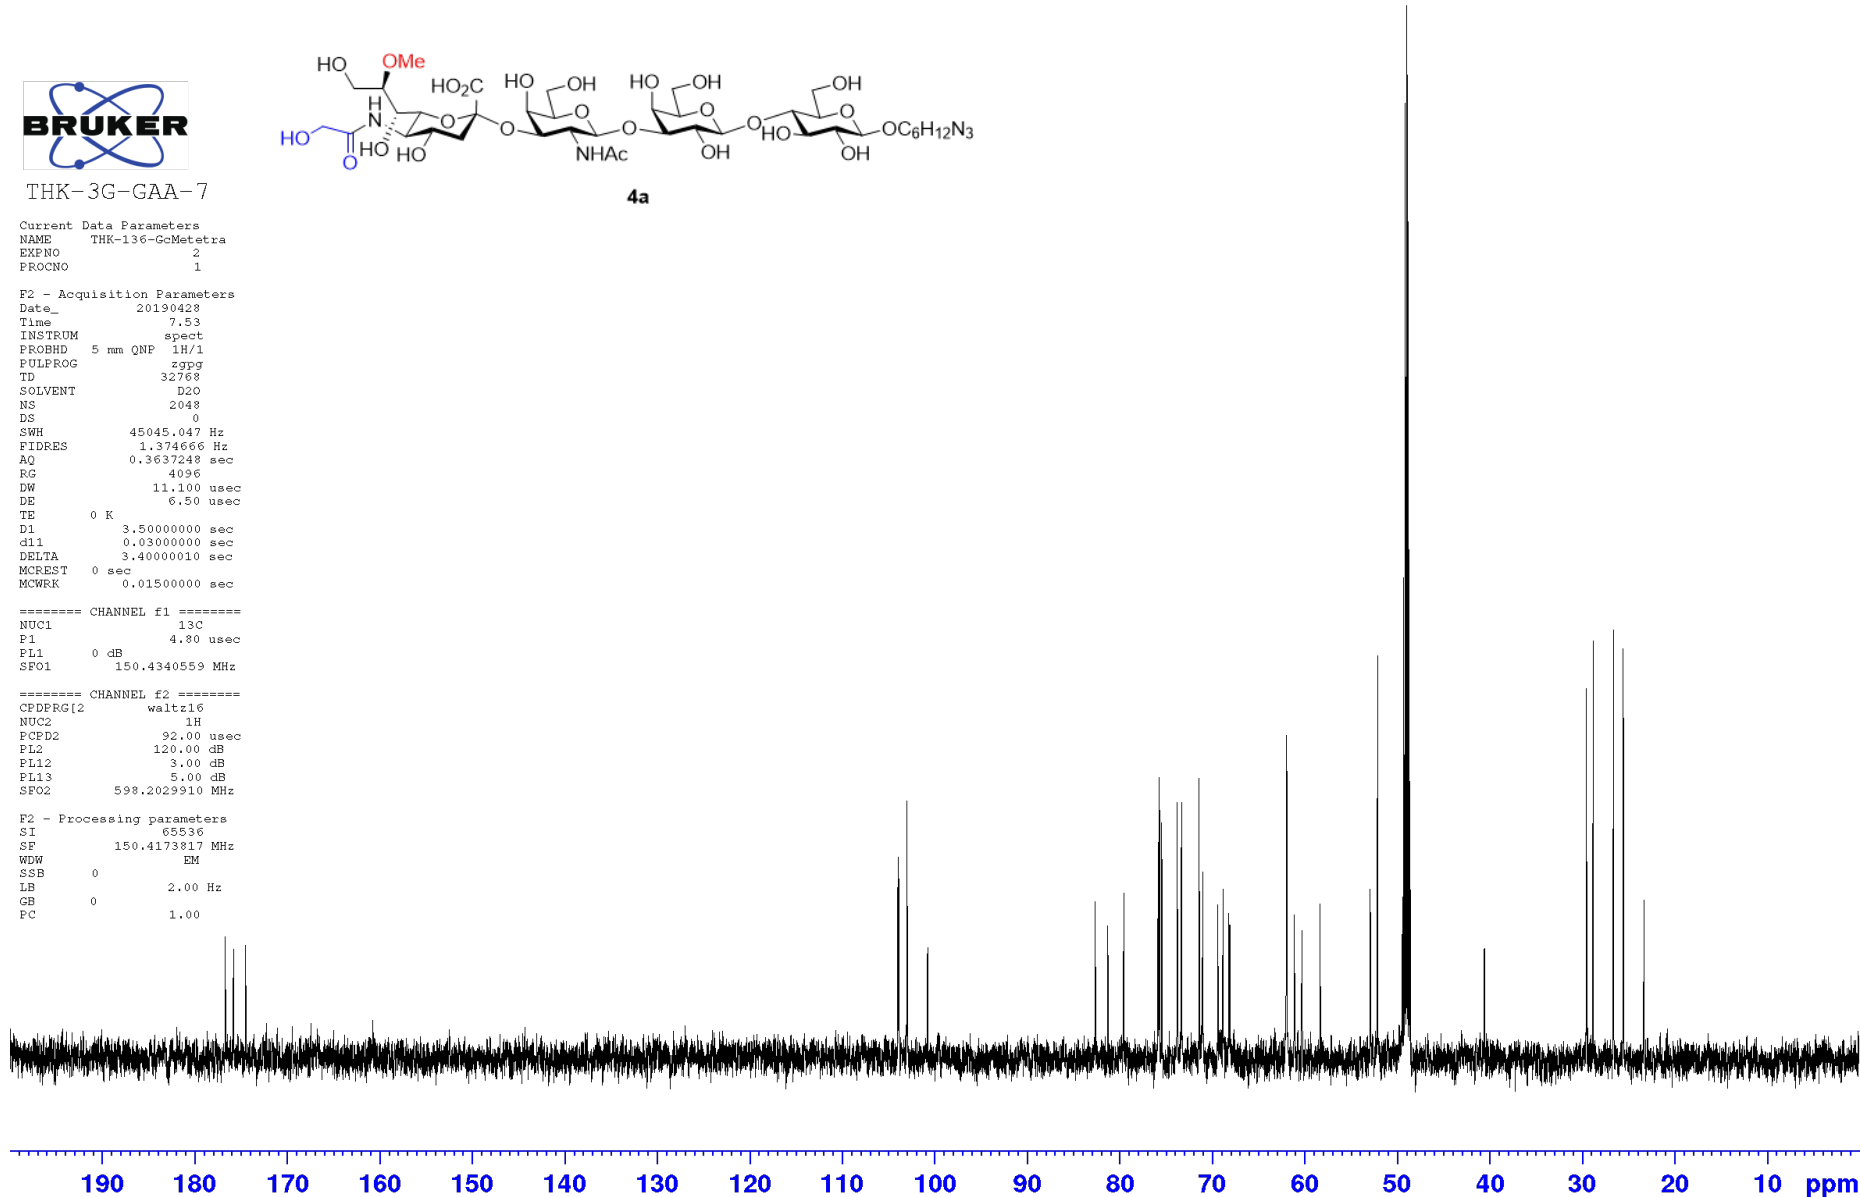

<sup>13</sup>C NMR spectrum of Compound 4a (150 MHz D<sub>2</sub>O)

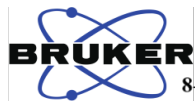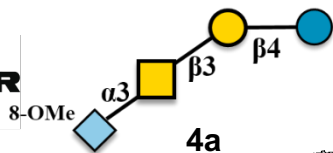

THK-3GM-GAA-7

Current Data Parameters  
NAME THK-136-GcMetetra  
EXPNO 11  
PROCNO 1

F2 - Acquisition Parameters  
Date\_ 20190428  
Time 13.14  
INSTRUM spect  
PROBHD 5 mm QNP 1H/1  
PULPROG cosyqf  
TD 2048  
SOLVENT Acetone  
NS 8  
DS 0  
SWH 6009.615 Hz  
FIDRES 2.934382 Hz  
AQ 0.1703936 sec  
RG 128  
DW 83.200 usec  
DE 6.50 usec  
TE 0 K  
d0 0.00000300 sec  
D1 1.50000000 sec  
IN0 0.00016640 sec  
MCREST 0 sec  
MCWRK 1.50000000 sec

----- CHANNEL f1 -----  
NUC1 1H  
P0 13.00 usec  
P1 15.90 usec  
PL1 -5.00 dB  
SFO1 598.2028100 MHz

F1 - Acquisition parameters  
TD 256  
SFO1 598.2028 MHz  
FIDRES 46.950119 Hz  
SW 10.046 ppm  
FnMODE QF

F2 - Processing parameters  
SI 2048  
SF 598.1999350 MHz  
WDW QSINE  
SSB 0  
LB 0 Hz  
GB 0  
PC 1.00

F1 - Processing parameters  
SI 512  
MC2 QF  
SF 598.1999350 MHz  
WDW QSINE  
SSB 0  
LB 0 Hz  
GB 0

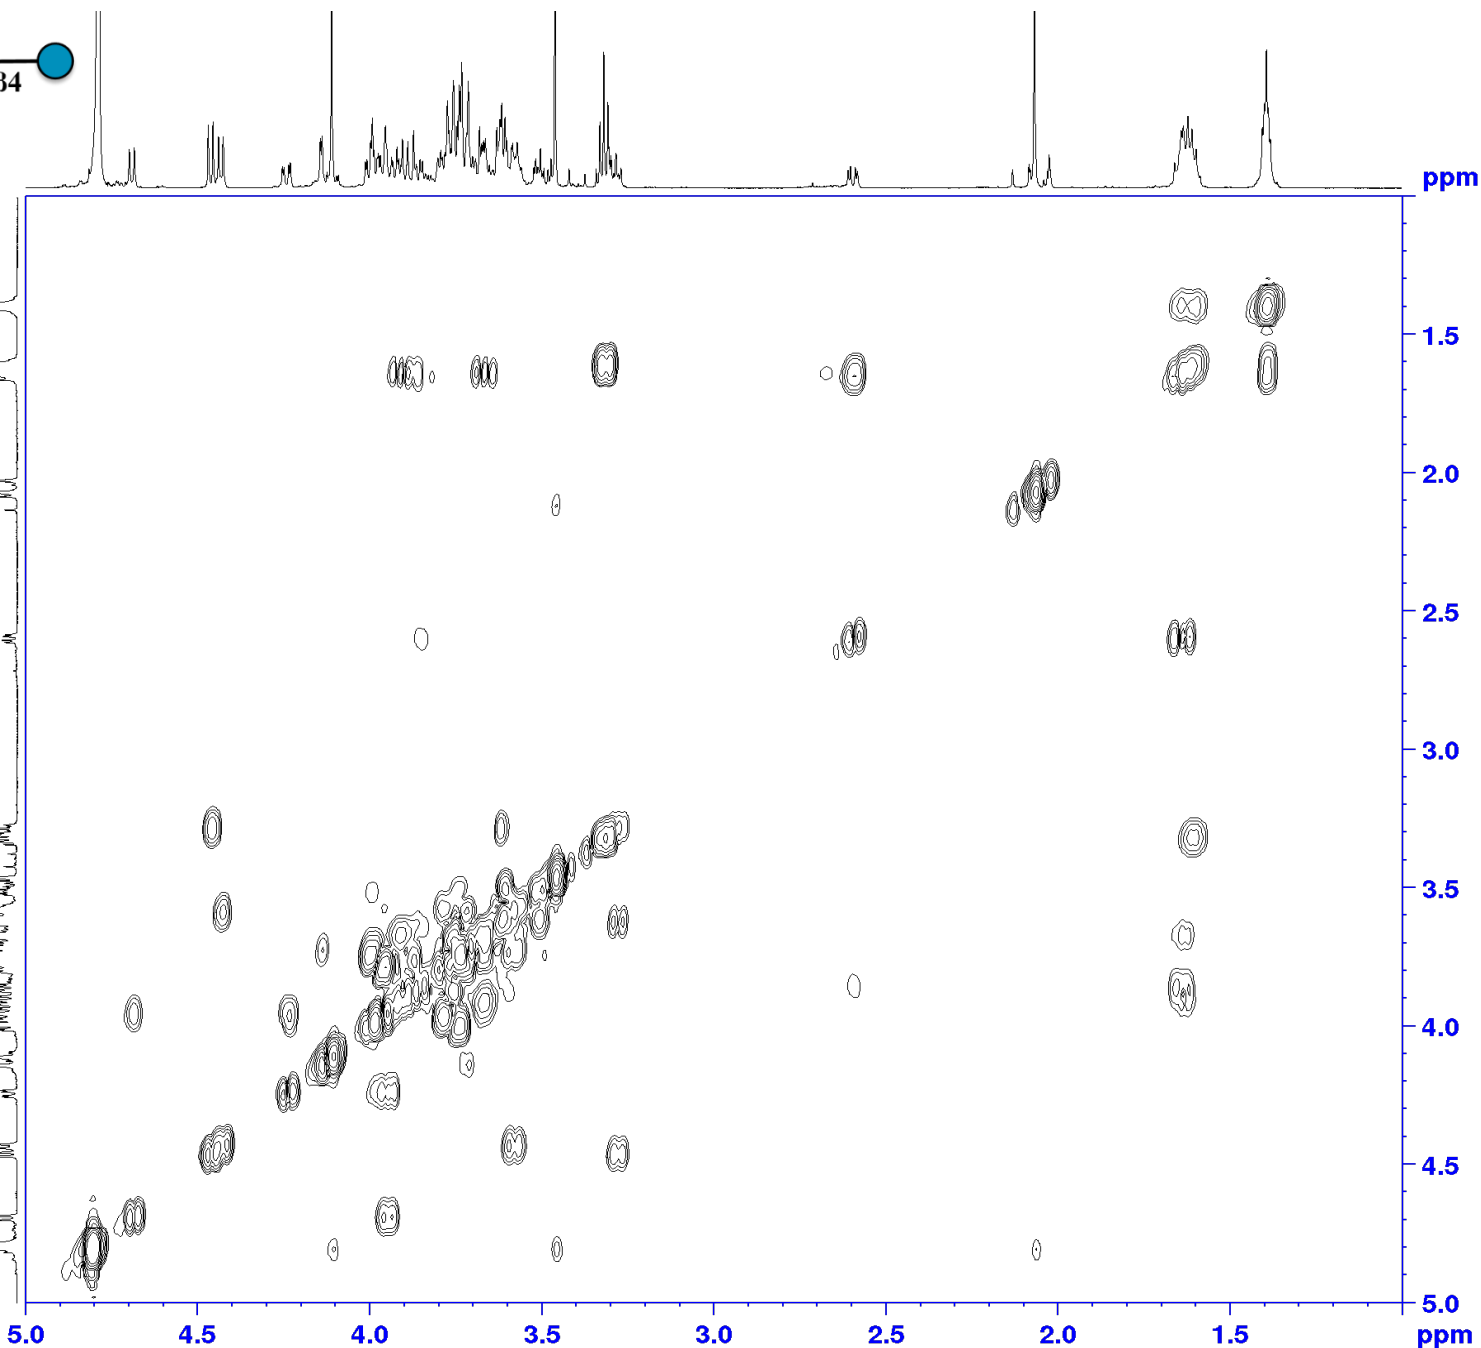

$^1\text{H}$ - $^1\text{H}$  COSY NMR spectrum of Compound **4a** (600 MHz  $\text{D}_2\text{O}$ )

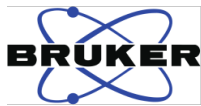

8-OMe

$\alpha$ 3

4a

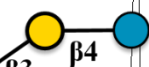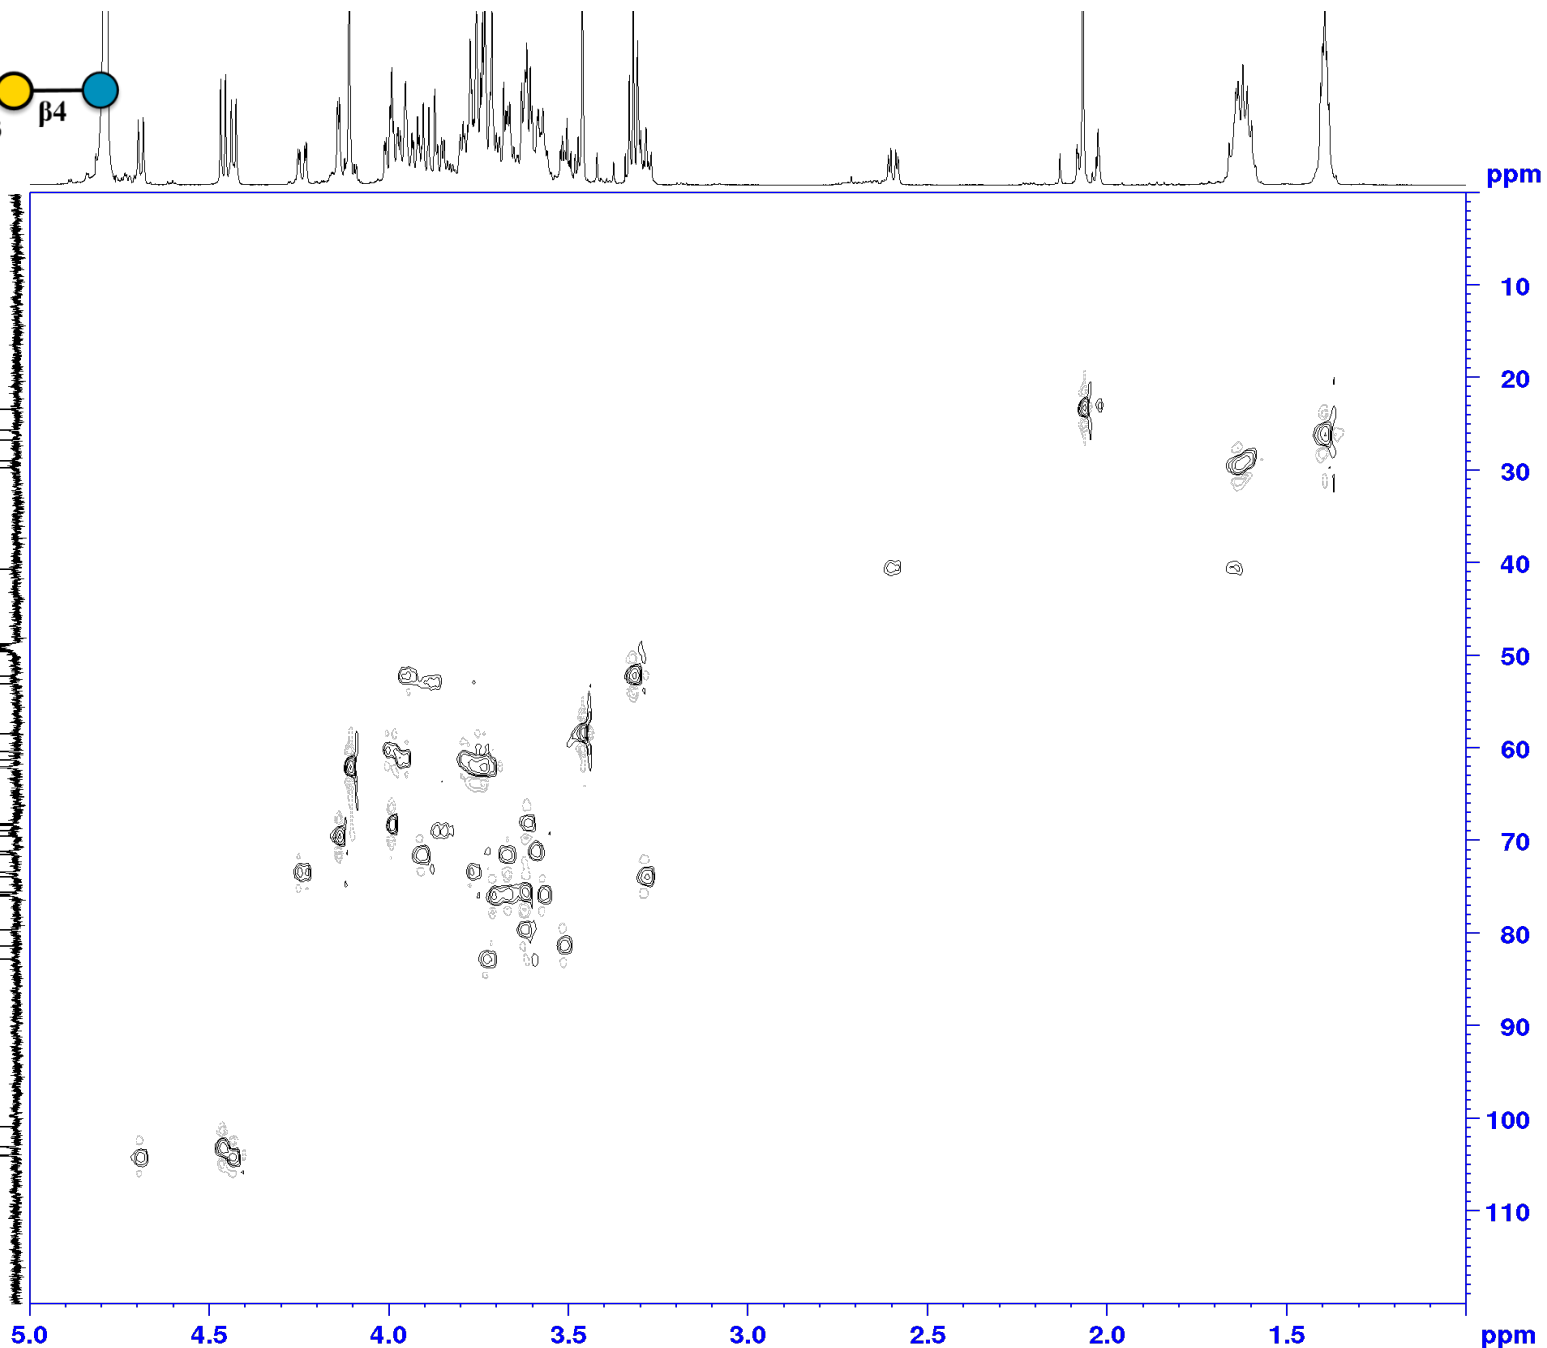

THK-3GM-GAA-7

Current Data Parameters  
NAME THK-136-GoMetaza  
EXPNO 12  
PROCNO 1

F2 - Acquisition Parameters  
Date\_ 20190428  
Time 14.12  
INSTRUM spect  
PROBHD 5 mm QNP 1H/1  
PULPROG hsqcetppa  
TD 2048  
SOLVENT cdcl3  
NS 8  
DS 8  
SWH 6009.615 Hz  
FIDRES 2.934362 Hz  
AQ 0.1703936 sec  
RG 32768  
DW 83.200 usec  
DE 4.50 usec  
TE 0 K

CHST2 145.0000000 sec  
d0 0.00000300 sec  
d1 1.20000005 sec  
d4 0.0012444 sec  
d11 0.03000000 sec  
d13 0.00000400 sec  
d16 0.00050000 sec  
d24 0.00089000 sec  
DELTA 0.00158780 sec  
DELTA1 0.00150800 sec  
IN0 0.00001511 sec  
MORPH 0 sec  
MORPH 0.20000041 sec  
ST1CNT 0

\*\*\*\*\* CHANNEL f1 \*\*\*\*\*  
NUC1 1H  
P1 15.90 usec  
p2 31.80 usec  
P2S 1000.00 usec  
PL1 -5.00 dB  
SFO1 598.2028100 MHz

\*\*\*\*\* CHANNEL E2 \*\*\*\*\*  
CPDPRG2 9acp  
NUC2 13C  
P3 10.00 usec  
p4 20.00 usec  
P4S 70.00 usec  
PL2 0 dB  
PL12 20.00 dB  
SFO2 150.4287913 MHz

\*\*\*\*\* GRADIENT CHANNEL \*\*\*\*\*  
GFNAM[1] SINE.100  
GFNAM[2] SINE.100  
GPX1 0 %  
GPX2 0 %  
GPY1 0 %  
GPY2 0 %  
GPH1 80.00 %  
GPH2 20.10 %  
P16 1000.00 usec

F1 - Acquisition parameters  
TD 256  
SFO1 150.4288 MHz  
FIDRES 258.478088 Hz  
SW 219.939 ppm  
FAMODE Echo-Antiecho

F2 - Processing parameters  
SI 2048  
SF 598.199520 MHz  
WDW QSINE  
SSB 4  
LB 0 Hz  
GB 0  
PC 1.00

F1 - Processing parameters  
SI 512  
MC2 echo-antiecho  
SF 150.4173600 MHz  
WDW QSINE  
SSB 4  
LB 0 Hz  
GB 0

$^1\text{H}$ - $^{13}\text{C}$  HSQC NMR spectrum of Compound **4a** (600 MHz/150 MHz  $\text{D}_2\text{O}$ )

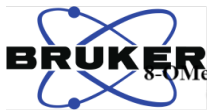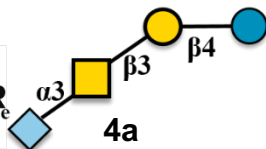

THK-3GM-GAA-7

Current Data Parameters  
NAME THK-136-GMetetra  
EXPNO 13  
PROCNO 1

F2 - Acquisition Parameters  
Date\_ 20190428  
Time 15.01  
INSTRUM spect  
PROBHD 5 mm QNP 1H/1  
PULPROG hmbcgp1pdqf  
TD 2048  
SOLVENT CDCl3  
NS 64  
DS 0  
SWH 6009.615 Hz  
FIDRES 2.934382 Hz  
AQ 0.1703936 sec  
RG 32768  
DW 83.200 usec  
DE 6.00 usec  
TE 0 K

CHST2 145.0000000  
CHST13 12.0000000  
d0 0.00000300 sec  
D1 1.00000000 sec  
d2 0.00348828 sec  
d6 0.04166667 sec  
D16 0.00050000 sec  
IND 0.00001661 sec  
MCREST 0 sec  
MCWRK 1.00000000 sec

----- CHANNEL f1 -----  
NUC1 1H  
P1 15.90 usec  
P2 31.80 usec  
PL1 -5.00 dB  
SFO1 598.2028100 MHz

----- CHANNEL f2 -----  
NUC2 13C  
P3 12.00 usec  
PL2 0 dB  
SFO2 150.4310476 MHz

----- GRADIENT CHANNEL -----  
GPNAM[1] SINE.100  
GPNAM[2] SINE.100  
GPNAM[3] SINE.100

GPX1 0 %  
GPX2 0 %  
GPX3 0 %  
GPY1 0 %  
GPY2 0 %  
GPY3 0 %  
GPZ1 50.00 %  
GPZ2 30.00 %  
GPZ3 40.10 %  
P16 1000.00 usec

F1 - Acquisition parameters  
ID 256  
SFO1 150.431 MHz  
FIDRES 235.139206 Hz  
SW 200.077 ppm  
FbMODE QF

F2 - Processing parameters  
SI 4096  
SF 598.1999270 MHz  
WDW QSINE  
SSB 2  
LB 0 Hz  
GB 0  
FC 1.00

F1 - Processing parameters  
SI 512  
MC2 QF  
SF 150.4173500 MHz  
WDW SINE  
SSB 0  
LB 0 Hz  
GB 0

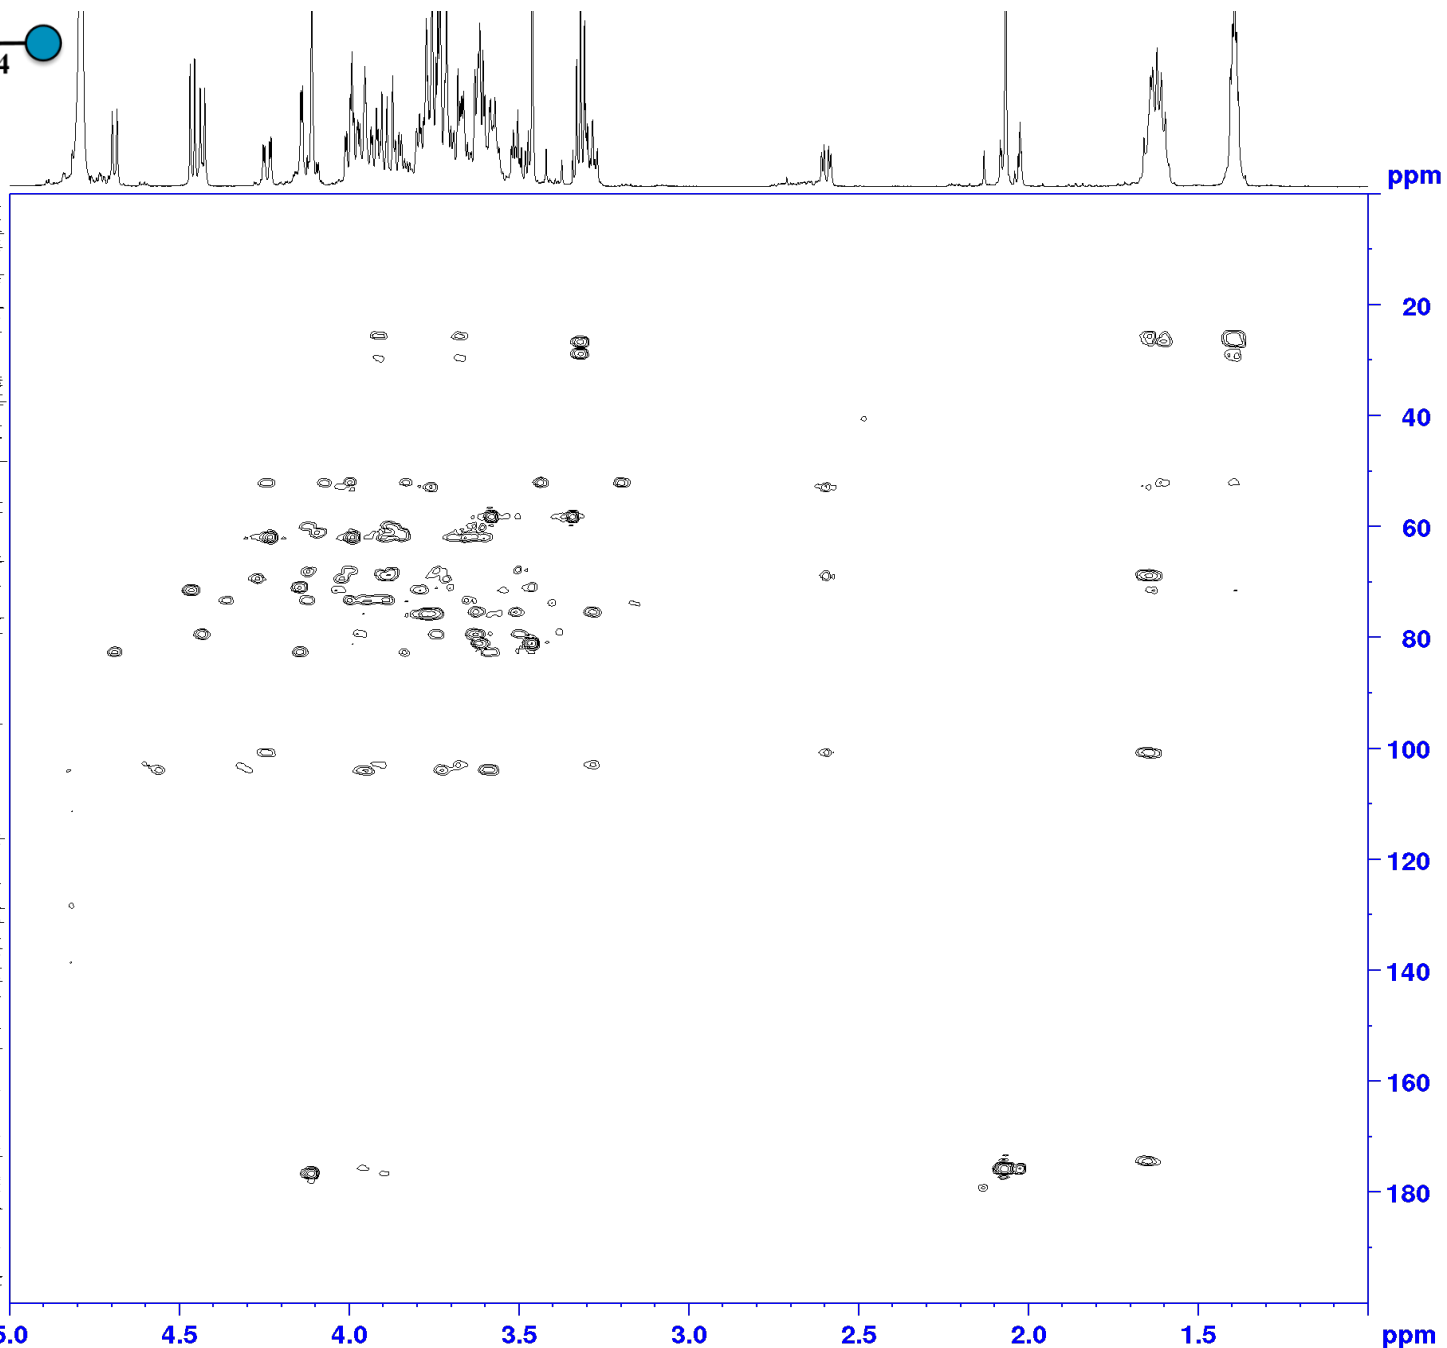

$^1\text{H}$ - $^{13}\text{C}$  HMBC NMR spectrum of Compound **4a** (600 MHz/150 MHz  $\text{D}_2\text{O}$ )

THK-6A-GAA7

Current Data Parameters  
NAME THK-297  
EXPNO 1  
PROCNO 1

F2 - Acquisition Parameters  
Date\_ 20200504  
Time 13.06  
INSTRUM spect  
PROBHD 5 mm QNP 1H/1  
PULPROG zg  
TD 32768  
SOLVENT D2O  
NS 32  
DS 0  
SWH 8389.262 Hz  
FIDRES 0.256020 Hz  
AQ 1.9529728 sec  
RG 1024  
DW 59.600 usec  
DE 6.50 usec  
TE 298.9 K  
D1 2.00000000 sec  
MCREST 0 sec  
MCWRK 0.01500000 sec

===== CHANNEL f1 =====  
NUC1 1H  
P1 10.00 usec  
PL1 -3.00 dB  
SFO1 598.1031956 MHz

F2 - Processing parameters  
SI 32768  
SF 598.0999528 MHz  
WDW no  
SSB 0  
LB 0 Hz  
GB 0  
PC 2.00

4.7899  
4.6030  
4.5889  
4.4856  
4.4722  
4.4501  
4.4369  
4.41835  
4.1780  
3.9889  
3.9855  
3.9683  
3.9653  
3.9498  
3.9444  
3.9380  
3.9324  
3.9277  
3.9208  
3.9158  
3.9139  
3.9045  
3.9005  
3.8964  
3.8866  
3.8816  
3.8744  
3.8678  
3.8637  
3.8541  
3.8472  
3.8410  
3.8062  
3.8002  
3.7870  
3.7814  
3.7680  
3.7613  
3.7466  
3.7397  
3.7335  
3.7281  
3.7227  
3.7173  
3.7075  
3.7052  
3.6998  
3.6931  
3.6902  
3.6839  
3.6764  
3.6727  
3.6669  
3.6591  
3.6572  
3.6465  
3.6425  
3.6373  
3.6319  
3.6268  
3.6198  
3.6003  
3.5940  
3.5916  
3.5872  
3.5839  
3.5792  
3.5764  
3.5705  
3.5412  
3.5297  
3.5181  
3.5155  
3.5019  
3.2997  
3.2862  
3.2463  
3.2385  
3.2256  
2.7178  
2.0355  
2.0341  
1.6772  
1.6690  
1.6568  
1.6448  
1.6364  
1.6315

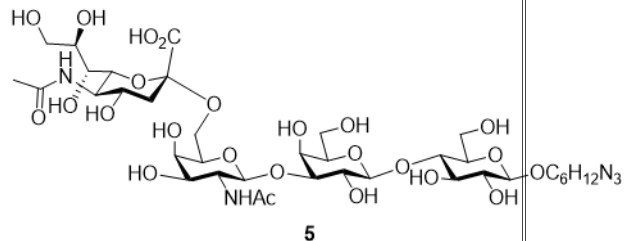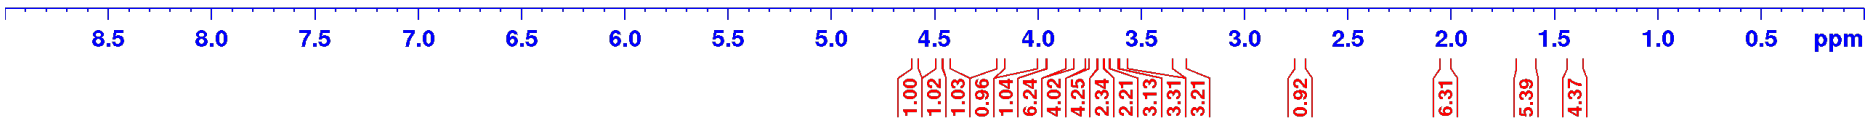

<sup>1</sup>H NMR spectrum of Compound 5 (600 MHz D<sub>2</sub>O)



THK-6A-GAA7

```

Current Data Parameters
NAME      THK-297
EXPNO    2
PROCNO   1

F2 - Acquisition Parameters
Date_    20200504
Time     13:43
INSTRUM spect
PROBHD   5 mm QNP 1H/1
PULPROG zgpg
TD       32768
SOLVENT  D2O
NS       500
DS       0
SWH      45045.047 Hz
FIDRES   1.374666 Hz
AQ       0.3637248 sec
RG       4096
DW       11.100 usec
DE       6.50 usec
TE       298.6 K
D1       3.5000000 sec
d11      0.03000000 sec
DELTA    3.40000010 sec
MCREST   0 sec
MCWRK    0.01500000 sec

===== CHANNEL f1 =====
NUC1     13C
P1       4.80 usec
PL1      0 dB
SFO1     150.4102296 MHz

===== CHANNEL f2 =====
CPDPRG2  waltz16
NUC2     1H
PCPD2    92.00 usec
PL2      120.00 dB
PL12     6.00 dB
PL13     15.00 dB
SFO2     598.1020934 MHz

F2 - Processing parameters
SI       65536
SF       150.3922198 MHz
WDW      EM
SSB      0
LB       3.00 Hz
GB       0
PC       1.00
    
```

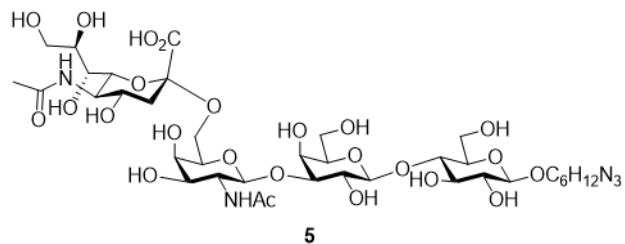

176.037  
175.991  
174.371

104.132  
103.881  
102.965  
101.345  
83.015  
79.404  
75.927  
75.716  
75.422  
74.172  
73.763  
73.558  
72.687  
71.613  
71.465  
70.965  
69.175  
68.635  
64.384  
63.580  
62.122  
61.075  
53.439  
52.830  
49.432  
49.286  
49.142  
48.998  
48.854  
48.709  
48.569  
41.154  
29.536  
28.830  
26.612  
25.554  
23.177  
22.967

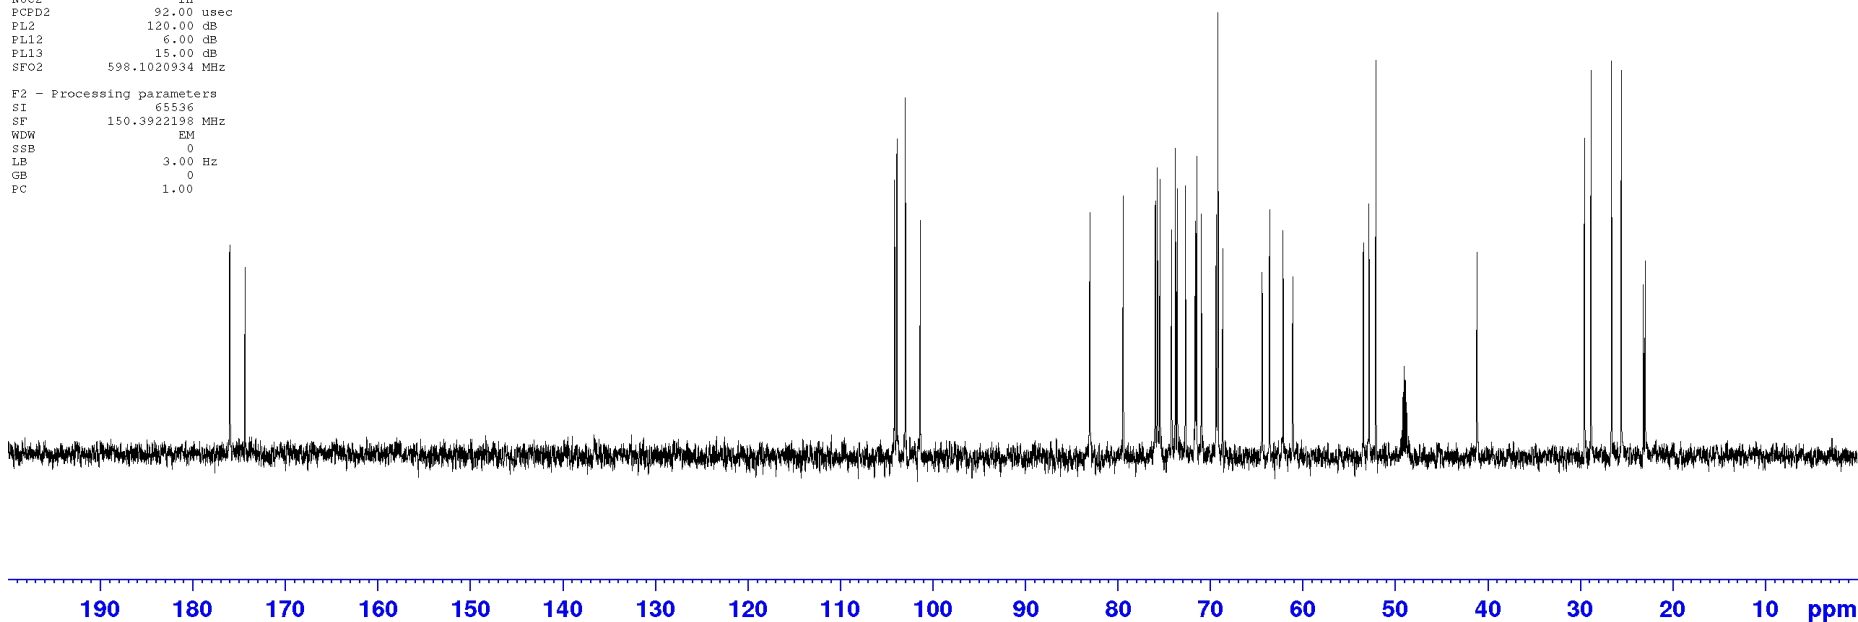

<sup>13</sup>C NMR spectrum of Compound 5 (150 MHz D<sub>2</sub>O)

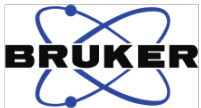

THK-6A-GAA7

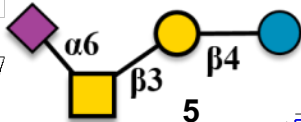

Current Data Parameters  
NAME THK-297  
EXPNO 11  
PROCNO 1

F2 - Acquisition Parameters  
Date\_ 20200504  
Time 13.43  
INSTRUM spect  
PROBHD 5 mm QNP 1H/1  
PULPROG cosyqf  
TD 2048  
SOLVENT D2O  
NS 16  
DS 0  
SWH 6009.615 Hz  
FIDRES 2.934382 Hz  
AQ 0.1703936 sec  
RG 32  
DW 83.200 usec  
DE 6.50 usec  
TE 298.6 K  
d0 0.00000300 sec  
D1 1.50000000 sec  
IN0 0.00016640 sec  
MCREST 0 sec  
MCWRK 1.50000000 sec

==== CHANNEL f1 =====  
NUC1 1H  
P0 14.00 usec  
P1 40.00 usec  
PL1 -3.00 dB  
SFO1 598.1028177 MHz

F1 - Acquisition parameters  
TD 256  
SFO1 598.1028 MHz  
FIDRES 46.950119 Hz  
SW 10.048 ppm  
FnMODE QF

F2 - Processing parameters  
SI 2048  
SF 598.0999500 MHz  
WDW QSINE  
SSB 0  
LB 0 Hz  
GB 0  
PC 1.00

F1 - Processing parameters  
SI 512  
MC2 QF  
SF 598.0999535 MHz  
WDW QSINE  
SSB 0  
LB 0 Hz  
GB 0

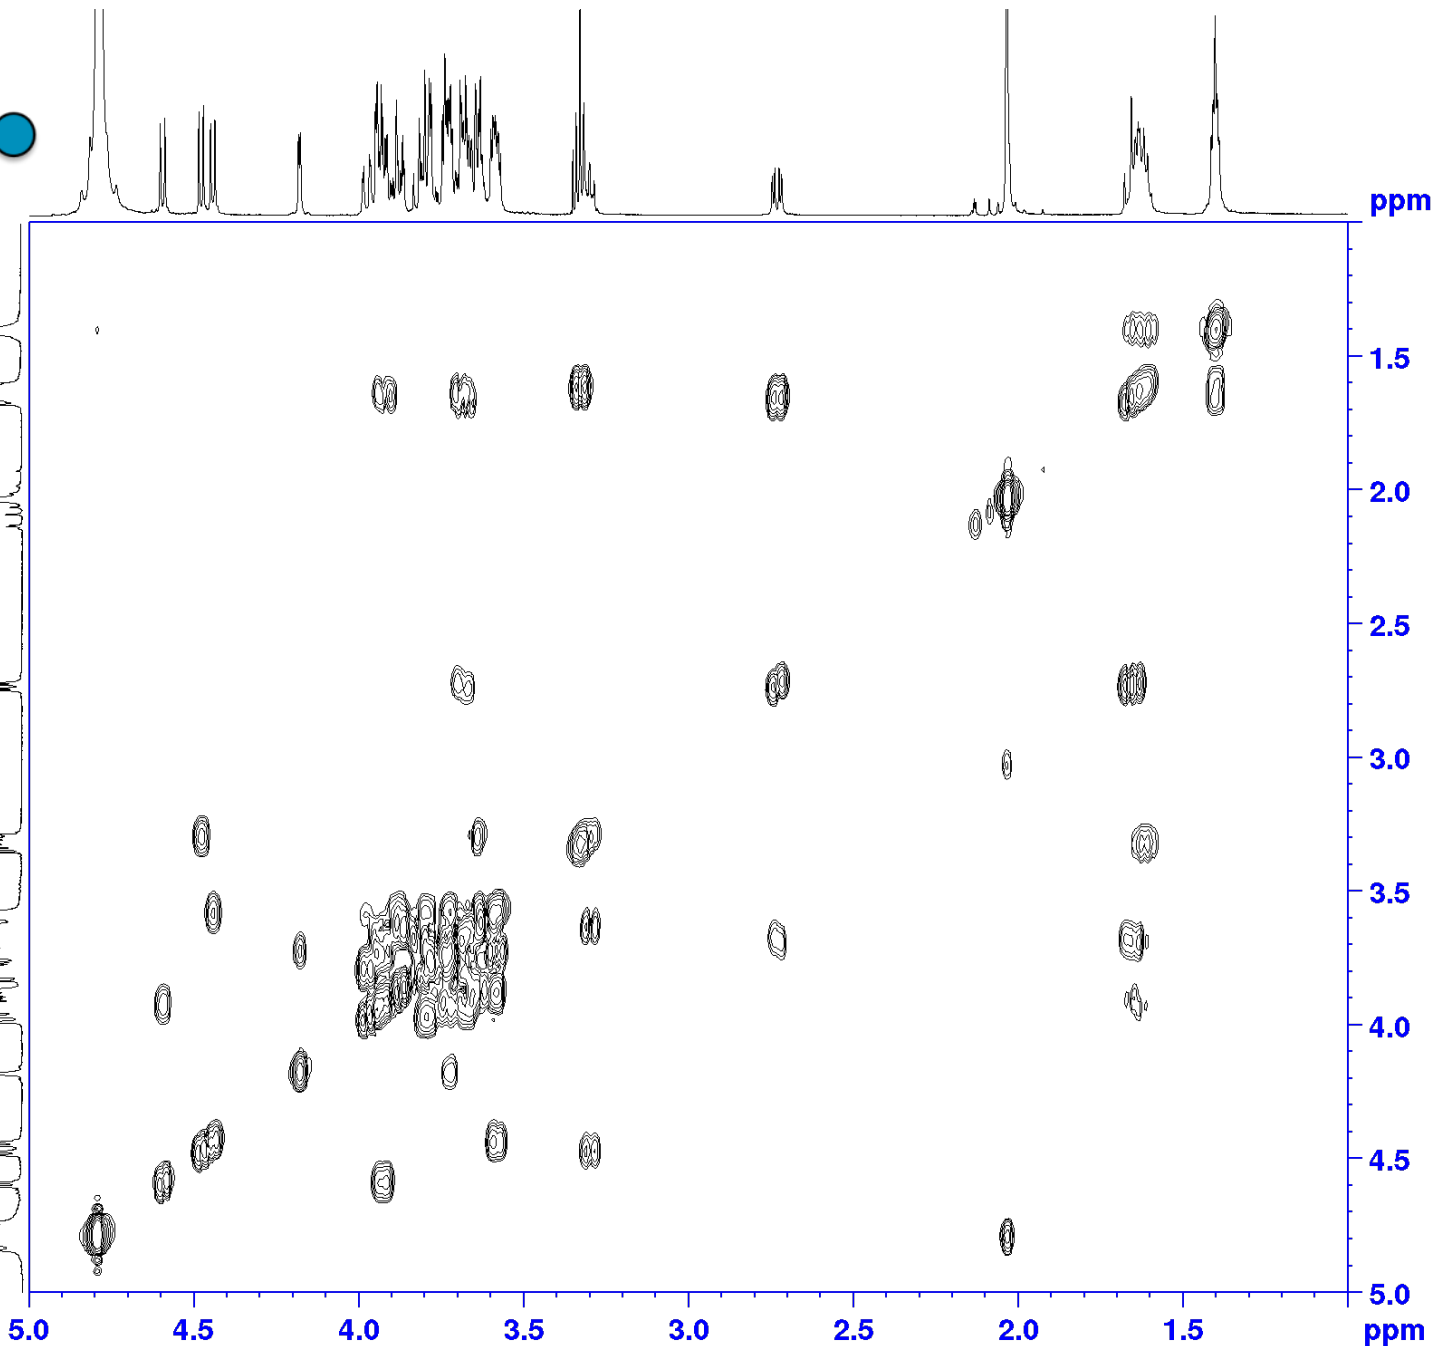

$^1\text{H}$ - $^1\text{H}$  COSY NMR spectrum of Compound 5 (600 MHz  $\text{D}_2\text{O}$ )

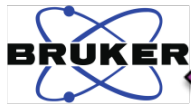

THK-6A-GAA7

Current Data Parameters  
NAME THK-297  
EXPNO 12  
PROCNO 1

F2 - Acquisition Parameters  
Date\_ 20200505  
Time\_ 13.53  
INSTRUM spect  
PROBHD 5 mm QNP 1H/1  
PULPROG hsqcetgpa1  
TD 2048  
SOLVENT CH3NO2  
NS 8  
DS 8  
SWH 6009.615 Hz  
FIDRES 2.934382 Hz  
AQ 0.1703936 sec  
RG 16384  
TW 83.200 usec  
DE 6.50 usec  
TE 297.9 K  
CNST2 145.0000000  
d0 0.00000300 sec  
d1 1.20000005 sec  
d4 0.00172414 sec  
d11 0.03000000 sec  
d13 0.00000400 sec  
d16 0.00050000 sec  
d24 0.00089000 sec  
DELTA 0.00162000 sec  
DELTA1 0.00150800 sec  
INO 0.00001511 sec  
MCRET 0 sec  
MCMRK 0.20000041 sec  
STCNT 0

===== CHANNEL f1 =====  
NUC1 1H  
F1 32.00 usec  
p2 64.00 usec  
F28 1000.00 usec  
PL1 -3.00 dB  
SFO1 598.1028177 MHz

===== CHANNEL E2 =====  
CPDPRG2 gcp  
NUC2 13C  
F3 10.00 usec  
p4 20.00 usec  
PCPD2 70.00 usec  
PL2 0 dB  
PL12 20.00 dB  
SFO2 150.4036444 MHz

===== GRADIENT CHANNEL =====  
GPNAM[1] SINE.100  
GPNAM[2] SINE.100  
GEX1 0 %  
GEX2 0 %  
GEY1 0 %  
GEY2 0 %  
GFX1 80.00 %  
GFX2 20.10 %  
P16 1000.00 usec

F1 - Acquisition parameters  
TD 360  
SFO1 150.4036 MHz  
FIDRES 183.806641 Hz  
SW 219.976 ppm  
EPMODE Echo-Antiecho

F2 - Processing parameters  
SI 2048  
SF 598.0999557 MHz  
WDW QSINE  
SSB 4  
LE 0 Hz  
GE 0  
FC 1.00

F1 - Processing parameters  
SI 512  
MC2 echo-antiecho  
SF 150.3922053 MHz  
WDW QSINE  
SSB 4  
LE 0 Hz  
GE 0

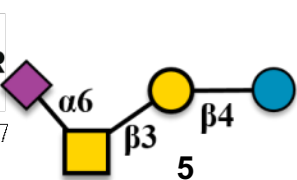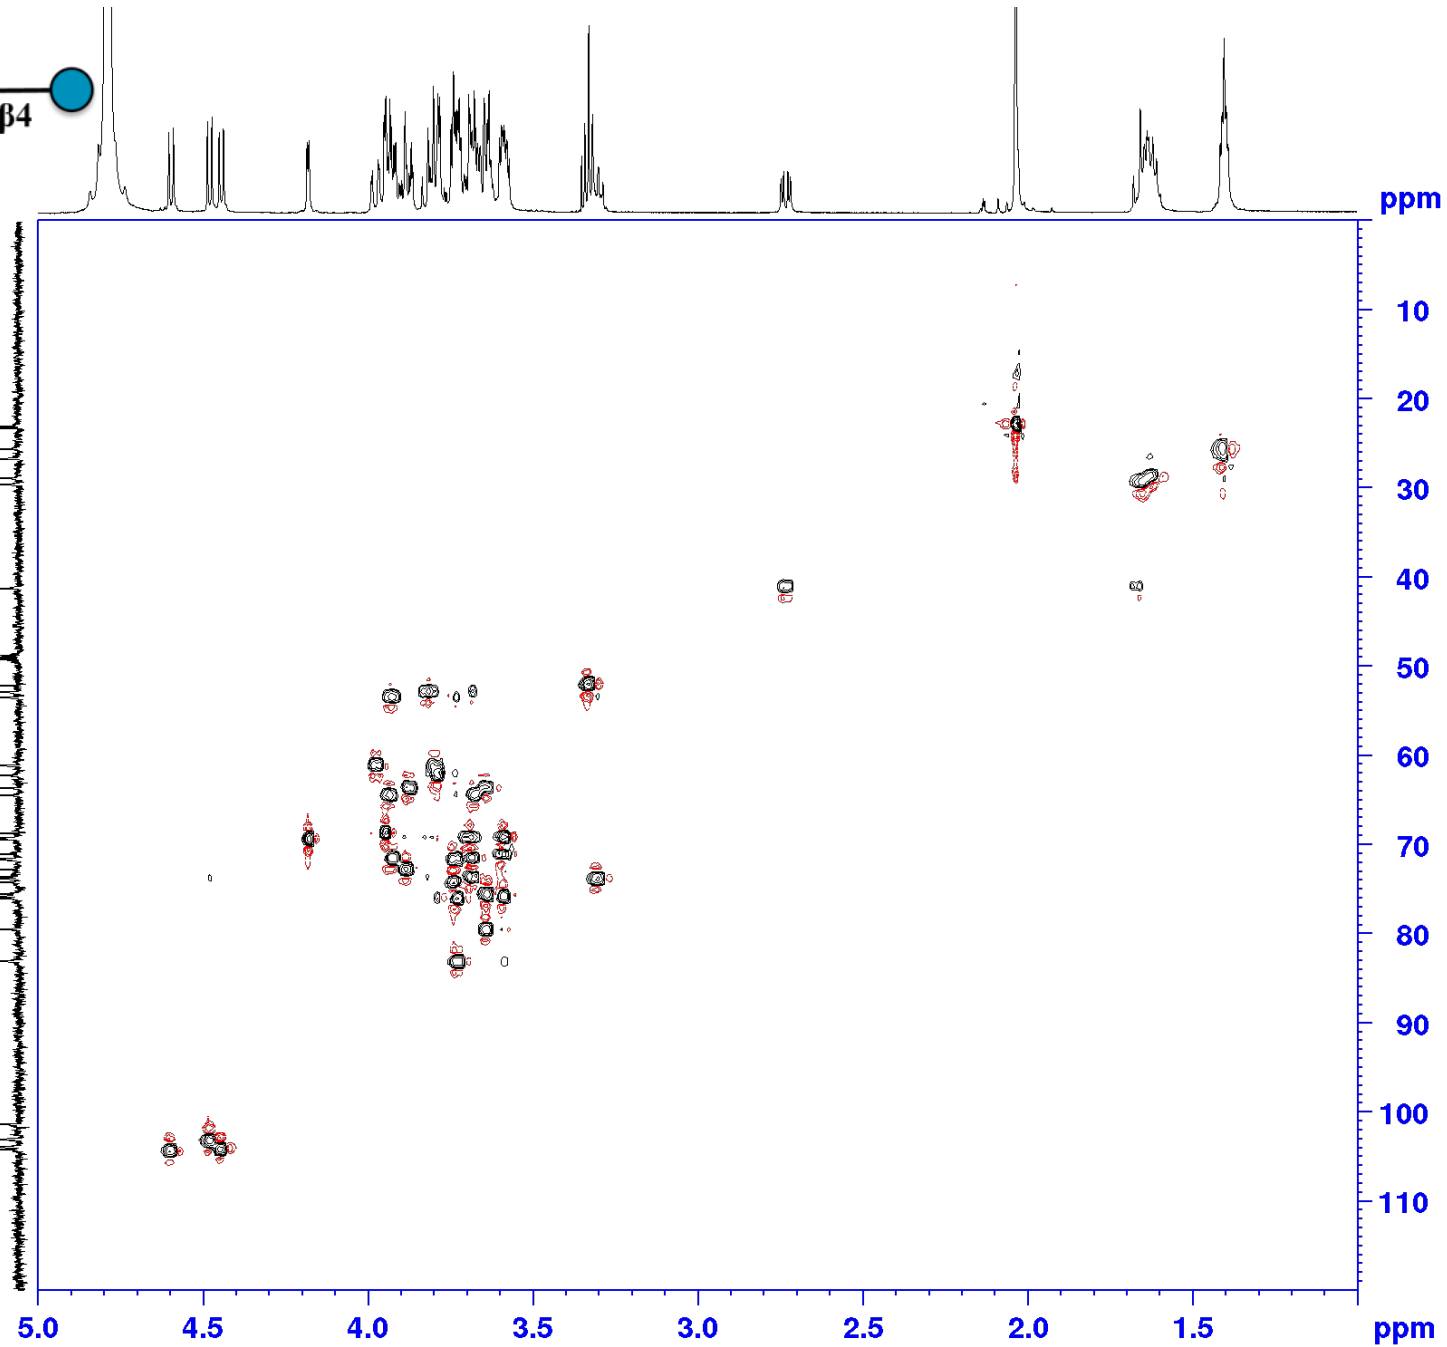

$^1\text{H}$ - $^{13}\text{C}$  HSQC NMR spectrum of Compound 5 (600 MHz/150 MHz  $\text{D}_2\text{O}$ )

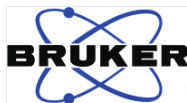

THK-6A-GAA7

Current Data Parameters  
NAME THK-297  
EXPNO 13  
PROCNO 1

F2 - Acquisition Parameters  
Date\_ 20200505  
Time 15:00  
INSTRUM spect  
PROBHD 5 mm QNP 1H/1  
PULPROG hmbcgplpdqf  
TD 2048  
SOLVENT CHAN02  
NS 16  
DS 0  
SWH 6009.615 Hz  
FIDRES 2.934382 Hz  
AQ 0.1703936 sec  
RG 327.68  
DW 83.200 usec  
DE 6.00 usec  
TE 298.4 K  
CNST2 145.0000000  
CNST13 2.0000000  
d0 0.00000300 sec  
D1 1.20000005 sec  
d2 0.00344828 sec  
d6 0.06250000 sec  
D16 0.00050000 sec  
INO 0.00001583 sec  
MCREST 0 sec  
MCREK 1.20000005 sec

==== CHANNEL f1 =====  
NUC1 1H  
P1 32.00 usec  
p2 64.00 usec  
PL1 -3.00 dB  
SFO1 598.1028177 MHz

==== CHANNEL f2 =====  
NUC2 13C  
P3 10.50 usec  
PL2 0 dB  
SFO2 150.4059003 MHz

==== GRADIENT CHANNEL =====  
GENAM[1] SINE.100  
GENAM[2] SINE.100  
GENAM[3] SINE.100  
GPX1 0 %  
GPX2 0 %  
GPX3 0 %  
GPY1 0 %  
GPY2 0 %  
GPY3 0 %  
GPZ1 50.00 %  
GPZ2 30.00 %  
GPZ3 40.10 %  
P16 1000.00 usec

F1 - Acquisition parameters  
TD 360  
SFO1 150.4059 MHz  
FIDRES 175.530975 Hz  
SW 210.069 ppm  
FMODE QF

F2 - Processing parameters  
SI 4096  
SF 598.0999360 MHz  
MDW QSINE  
SSB 2  
LB 0 Hz  
GB 0  
PC 1.00

F1 - Processing parameters  
SI 512  
MC2 QF  
SF 150.3922180 MHz  
MDW SINE  
SSB 0  
LB 0 Hz  
GB 0

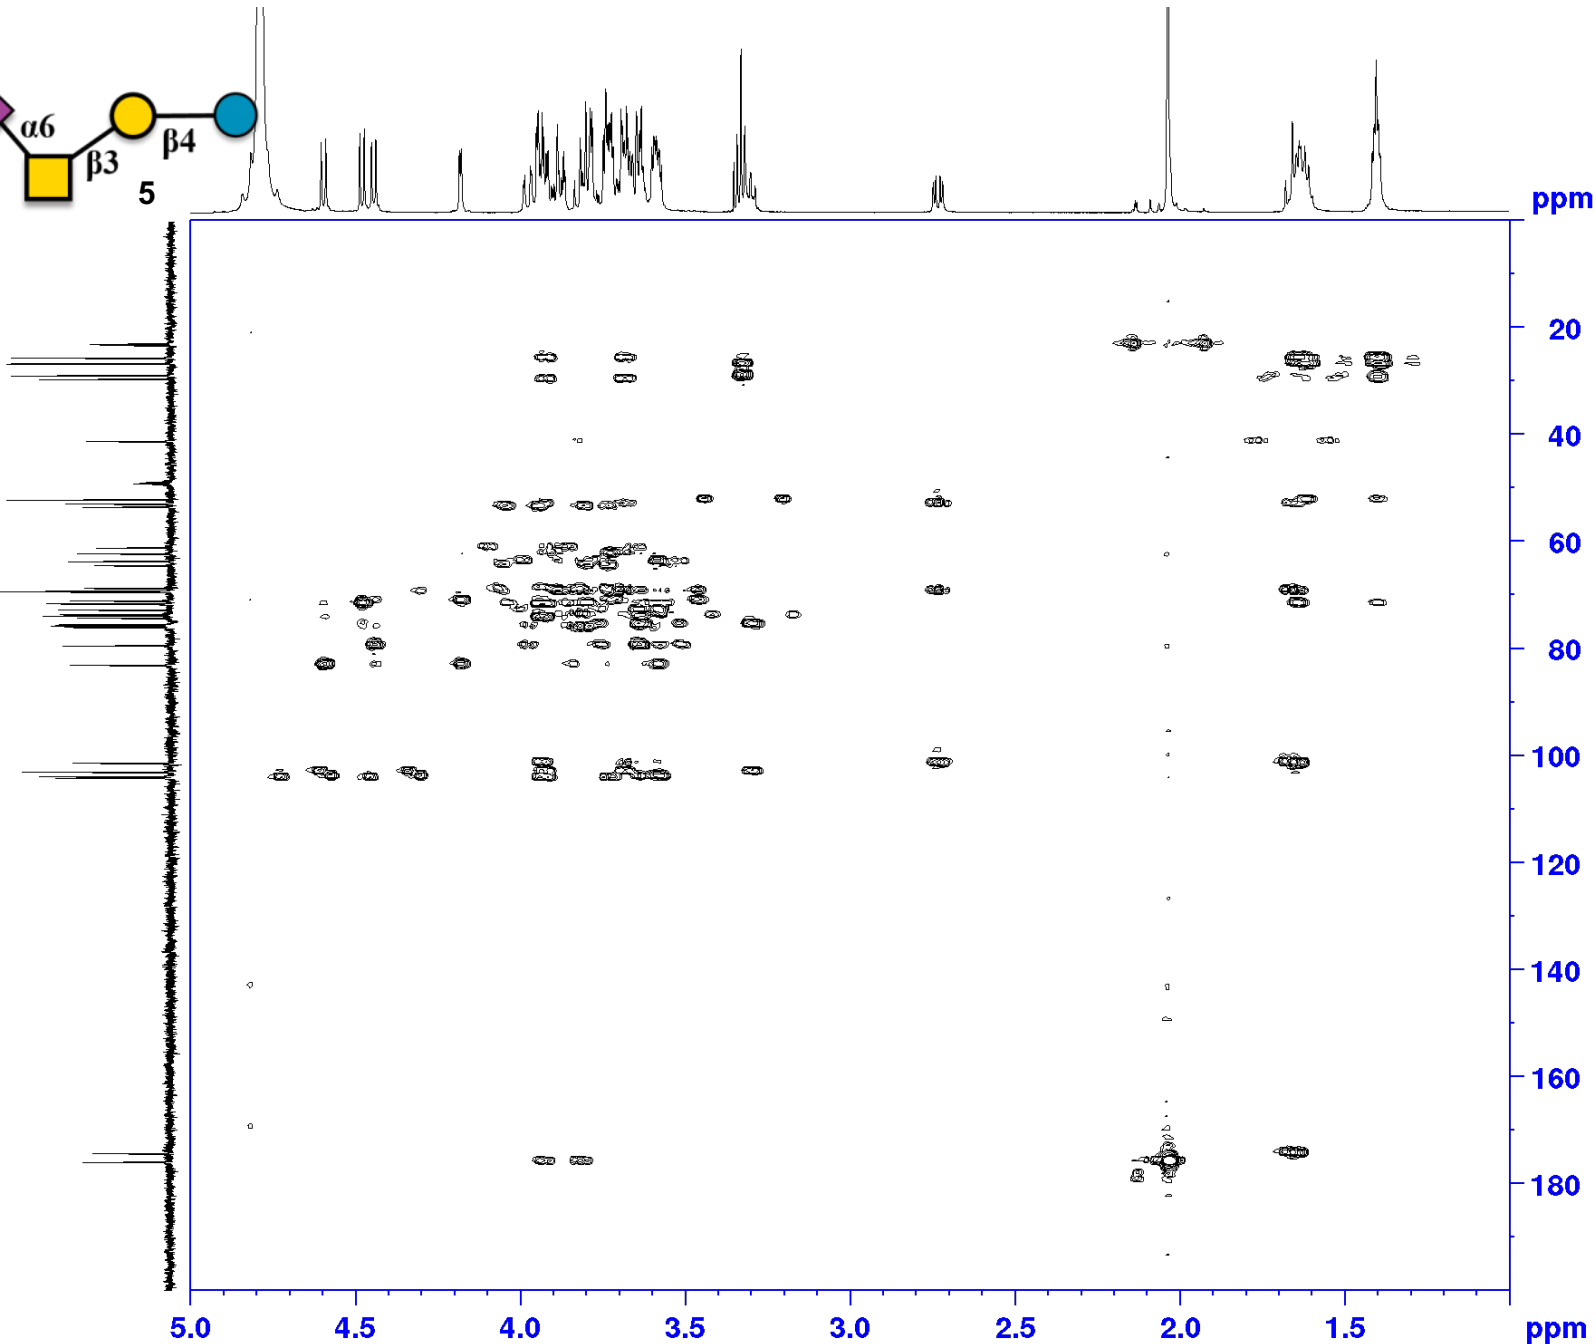

$^1\text{H}$ - $^{13}\text{C}$  HMBC NMR spectrum of Compound **5** (600 MHz/150 MHz  $\text{D}_2\text{O}$ )

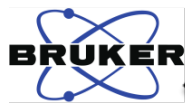

THK-6A-GAA7

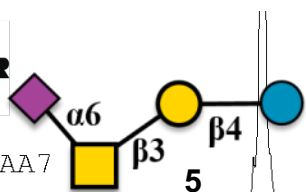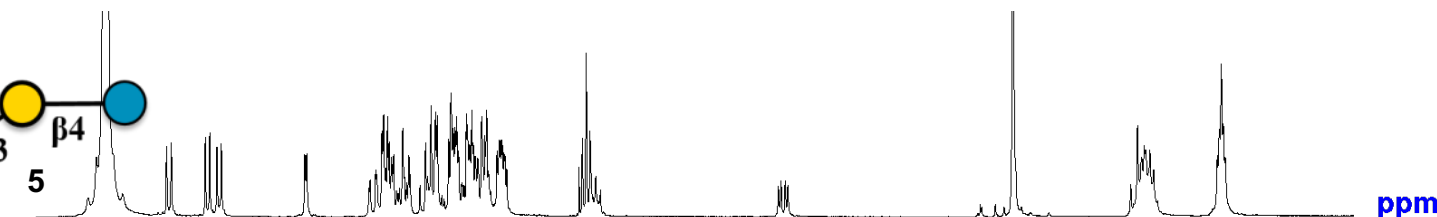

Current Data Parameters  
NAME THK-297  
EXPNO 15  
PROCNO 1

F2 - Acquisition Parameters  
Date\_ 20200506  
Time 3.44  
INSTRUM spect  
PROBHD 5 mm QNP 1H/1  
PULPROG hzgpgm1ph  
TD 2048  
SOLVENT cdcl3  
NS 16  
DS 8  
SWH 6009.615 Hz  
FIDRES 2.934392 Hz  
AQ 0.1703906 sec  
RG 32768  
DW 83.200 usec  
DE 6.50 usec  
TE 569.7 K  
CST2 145.0000000  
d0 0.0000300 sec  
d1 1.200000000 sec  
d4 0.00172414 sec  
d9 0.07500000 sec  
d11 0.00000000 sec  
d13 0.00000400 sec  
d16 0.00100000 sec  
DELTA 0.00200000 sec  
DELTA1 0.00007000 sec  
FACTOR1 3  
IN0 0.00001385 sec  
l1 18  
MORST 0 sec  
MORWK 0.60000002 sec  
SCALEP 6

==== CHANNEL f1 =====  
NUC1 1H  
P1 32.00 usec  
p2 64.00 usec  
p3 46.69 usec  
P6 70.00 usec  
p7 140.00 usec  
P17 1000.00 usec  
P28 1000.00 usec  
PL1 -3.00 dB  
PL10 4.00 dB  
SFO1 598.1028172 MHz

==== CHANNEL f2 =====  
CPDPRG2 garrp  
NUC2 13C  
P3 10.00 usec  
p4 20.00 usec  
PFD2 70.00 usec  
PL2 0 dB  
PL12 20.00 dB  
SFO2 150.4044237 MHz

==== GRADIENT CHANNEL =====  
GPNAM[1] SINE.100  
GPNAM[2] SINE.100  
GPNAM[3] SINE.100  
GFX1 0 %  
GFX2 0 %  
GFX3 0 %  
GPY1 0 %  
GPY2 0 %  
GPY3 0 %  
GPE1 80.00 %  
GPE2 30.00 %  
GPE3 20.10 %  
PL6 1000.00 usec

F1 - Acquisition parameters  
TD 300  
SFO1 150.4044 MHz  
FIDRES 240.673889 Hz  
SW 240.027 ppm  
F0MODE TFF1

F2 - Processing parameters  
SI 2048  
SF 598.0999514 MHz  
WDW Q8SINE  
SSB 2  
LB 0 Hz  
GB 0  
FC 1.00

F1 - Processing parameters  
SI 512  
M02 TFF1  
SF 150.3922204 MHz  
WDW Q8SINE  
SSB 2  
LB 0 Hz  
GB 0

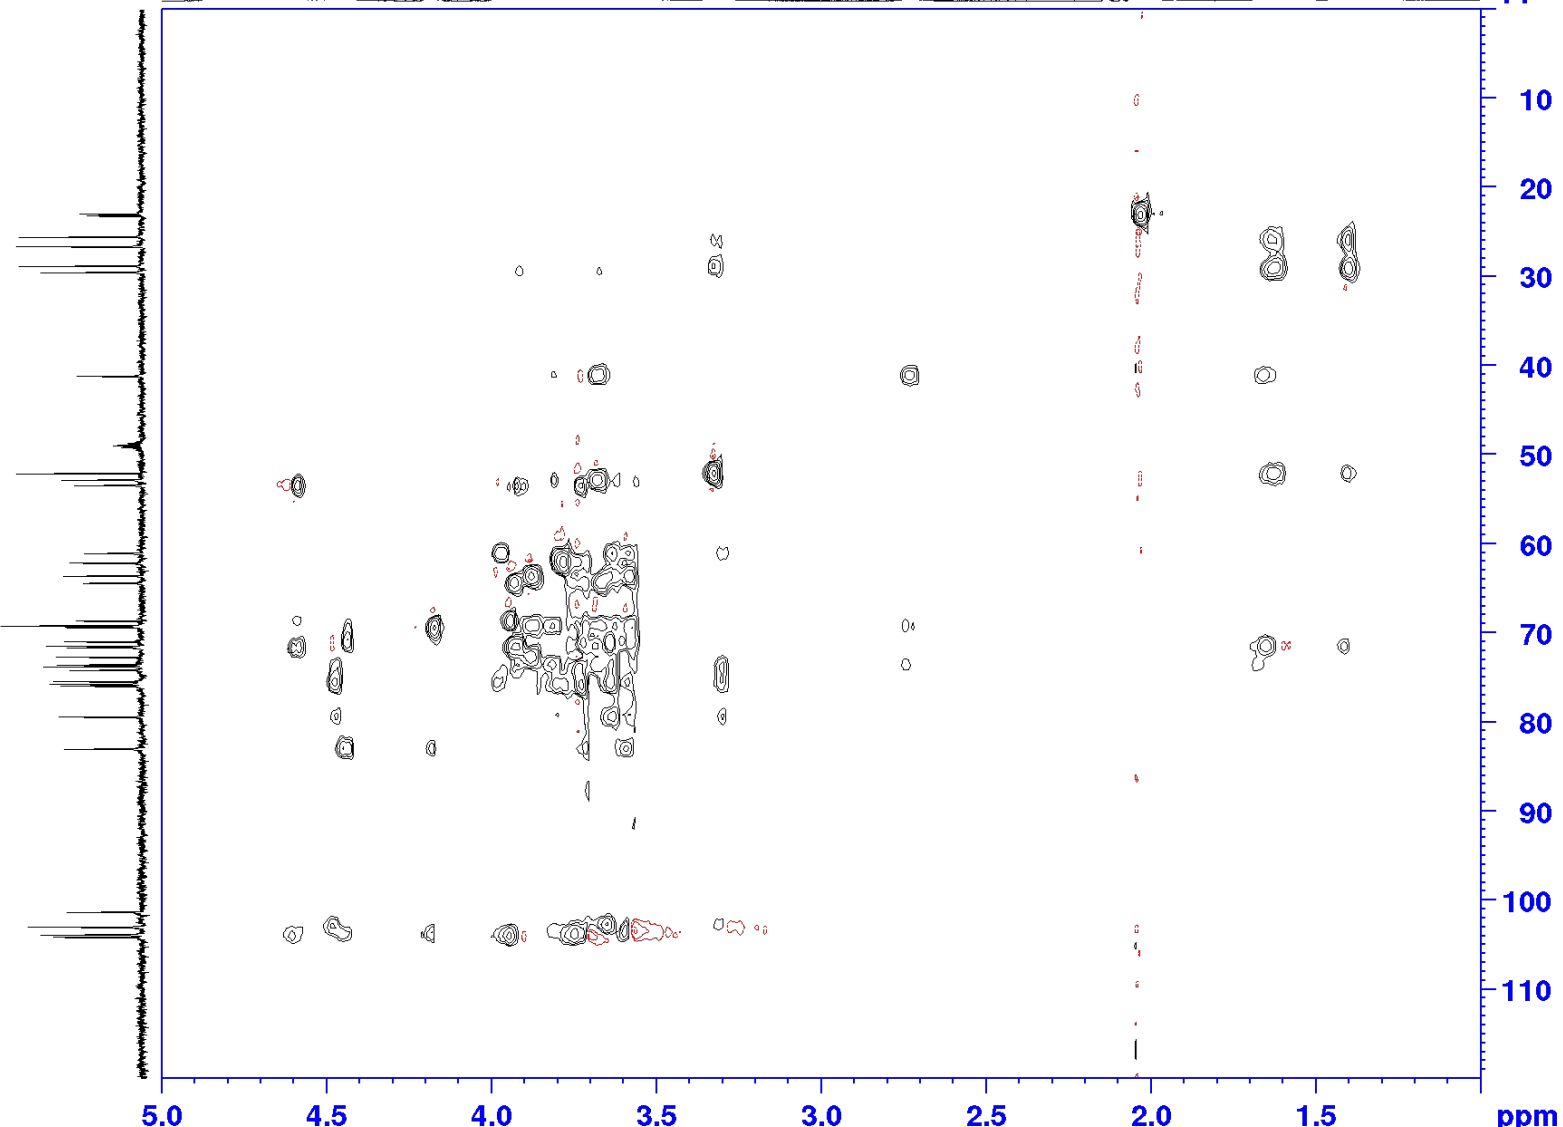

$^1\text{H}$ - $^{13}\text{C}$  HSQC-TOCSY NMR spectrum of Compound 5 (600 MHz/150 MHz  $\text{D}_2\text{O}$ )

THK-6GM-GAA7

Current Data Parameters  
NAME THK-283-1H-20200327.fid  
EXPNO 1  
PROCNO 1

F2 - Processing parameters  
SI 16384  
SF 499.7875562 MHz  
WDW EM  
SSB 0  
LB 0.30 Hz  
GB 0  
PC 1.00

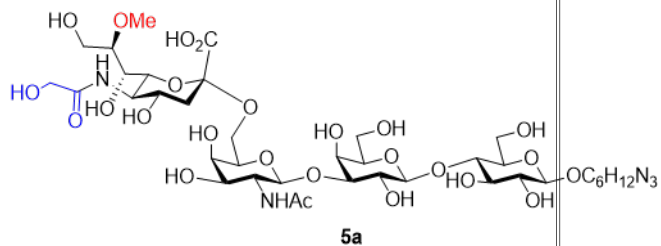

4.7889  
4.5891  
4.5723  
4.4599  
4.4439  
4.4193  
4.4036  
4.1540  
4.1485  
4.0925  
4.0354  
4.0184  
3.9965  
3.9660  
3.8592  
3.8462  
3.8359  
3.9313  
3.9186  
3.9064  
3.8982  
3.8858  
3.8767  
3.7967  
3.7800  
3.7733  
3.7568  
3.7446  
3.7362  
3.7268  
3.7214  
3.7072  
3.7004  
3.6833  
3.6742  
3.6653  
3.6592  
3.6441  
3.6342  
3.6208  
3.6157  
3.6070  
3.6016  
3.5890  
3.5733  
3.5572  
3.5552  
3.5442  
3.5383  
3.5270  
3.5211  
3.5131  
3.5031  
3.4636  
3.3111  
3.2974  
3.2836  
3.2698  
3.2567  
3.2524  
2.6267  
2.6178  
2.6021  
2.5936  
2.0056  
1.6364  
1.6270  
1.6127  
1.6013  
1.5880  
1.5742  
1.5601  
1.3862  
1.3792  
1.3713  
1.3642  
1.3570

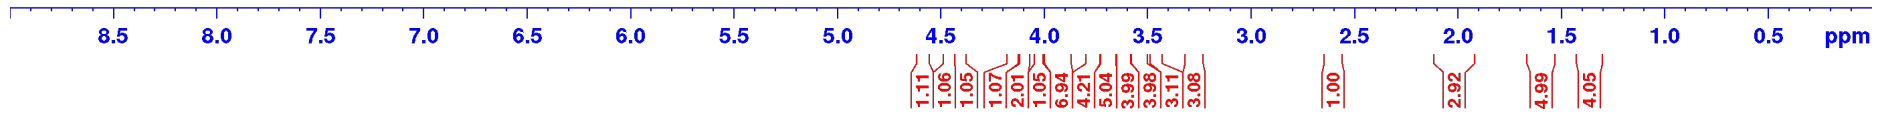

<sup>1</sup>H NMR spectrum of Compound 5a (500 MHz D<sub>2</sub>O)

176.738  
176.082  
174.623

104.133  
103.902  
102.974  
101.628

82.913  
81.427  
79.376  
75.938  
75.738  
75.429  
74.266  
73.774  
73.283  
71.590  
71.495  
71.039  
69.387  
68.650  
68.611  
68.115  
64.209  
62.135  
61.953  
61.074  
60.595  
58.591  
53.470  
52.863  
52.095  
49.513  
49.342  
48.169  
48.066  
48.824  
48.651  
48.478  
41.149  
29.549  
28.849  
26.626  
25.571  
23.183

THK-6GM-GAA7

Current Data Parameters  
NAME THK-283-13C-20200328.fid  
EXPNO 1  
PROCNO 1

F2 - Processing parameters  
SI 65536  
SF 125.6715636 MHz  
WDW EM  
SSB 0  
LB 0.30 Hz  
GB 0  
PC 1.00

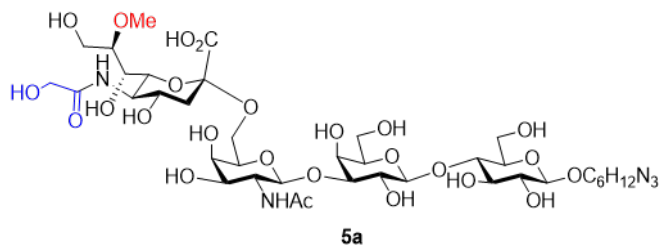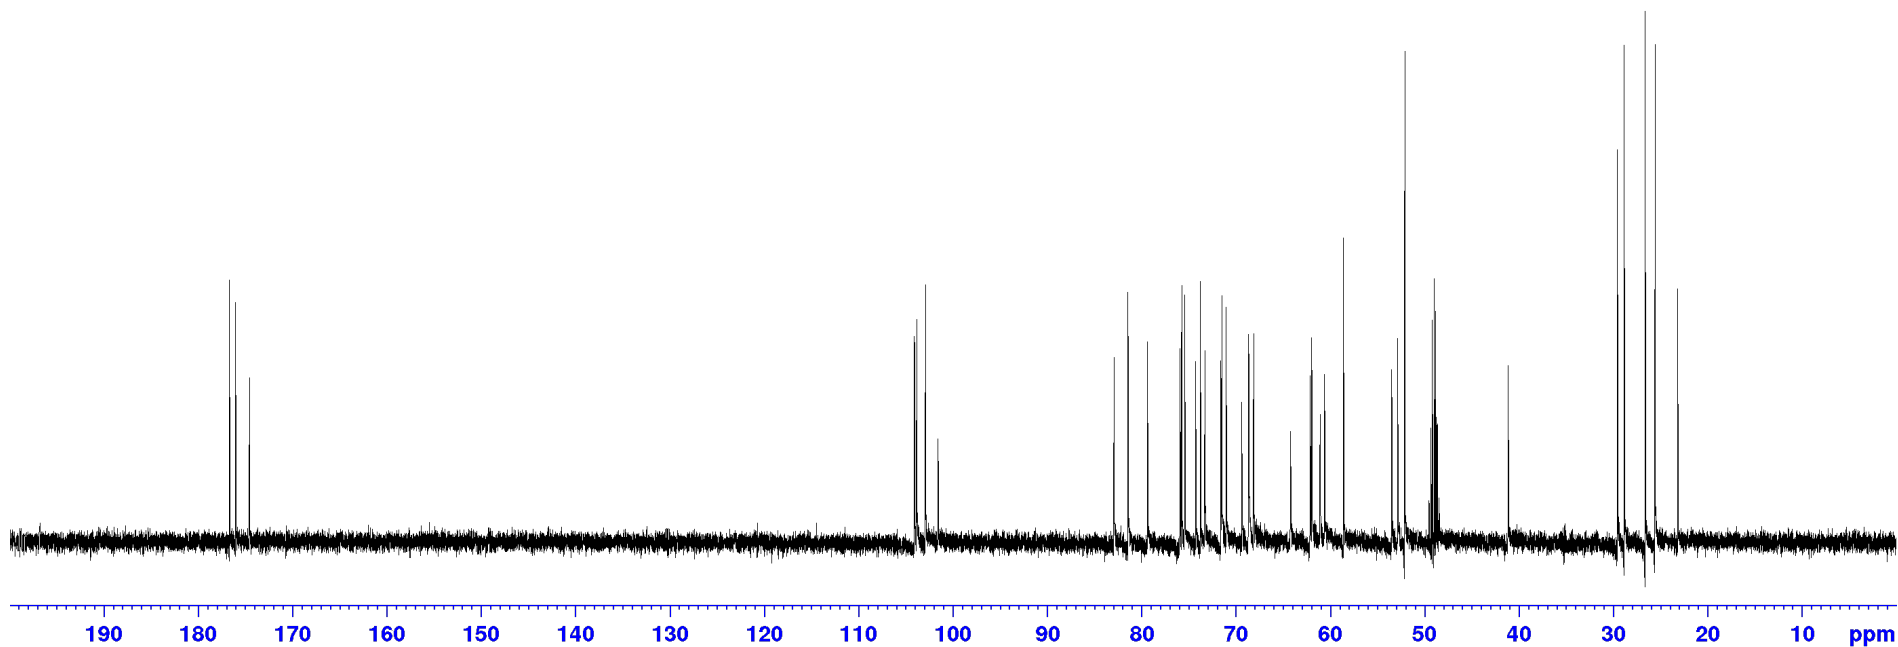

<sup>1</sup>H NMR spectrum of Compound 5a (125 MHz D<sub>2</sub>O)

4.7899  
4.5727  
4.5586  
4.4660  
4.4525  
4.3980  
4.3847  
4.1603  
4.1349  
3.9887  
3.9455  
3.9393  
3.9317  
3.9281  
3.9215  
3.9140  
3.9032  
3.8965  
3.8821  
3.8768  
3.8727  
3.8619  
3.8580  
3.8507  
3.8465  
3.8416  
3.8389  
3.8225  
3.8056  
3.7864  
3.7794  
3.7760  
3.7726  
3.7692  
3.7655  
3.7558  
3.7464  
3.7276  
3.7248  
3.7200  
3.7069  
3.7002  
3.6962  
3.6894  
3.6815  
3.6787  
3.6725  
3.6698  
3.6646  
3.6582  
3.6529  
3.6414  
3.6363  
3.6301  
3.6263  
3.6200  
3.6105  
3.6002  
3.5951  
3.5792  
3.5699  
3.5623  
3.5536  
3.5447  
3.5407  
3.5294  
3.5266  
3.3128  
3.3081  
3.3013  
3.2931  
3.2898  
3.2792  
3.26891  
2.6813  
2.6663  
2.6606  
2.0067  
2.0019  
1.7190  
1.6965  
1.6782  
1.6314  
1.6200  
1.6083  
1.6044  
1.5970  
1.5924  
1.5807  
1.5691  
1.3876  
1.3815  
1.3756  
1.3699  
1.3639

THK-6A'-GAA7

Current Data Parameters  
NAME THK-260-600  
EXPNO 1  
PROCNO 1

F2 - Acquisition Parameters  
Date\_ 20200114  
Time 11.15  
INSTRUM spect  
PROBHD 5 mm QNP 1H/1  
PULPROG zg  
TD 32768  
SOLVENT H2O+D2O  
NS 128  
DS 0  
SWH 9541.984 Hz  
FIDRES 0.291198 Hz  
AQ 1.7170432 sec  
RG 1024  
DW 52.400 usec  
DE 6.50 usec  
TE 294.6 K  
D1 2.00000000 sec  
MCREST 0 sec  
MCWRK 0.01500000 sec

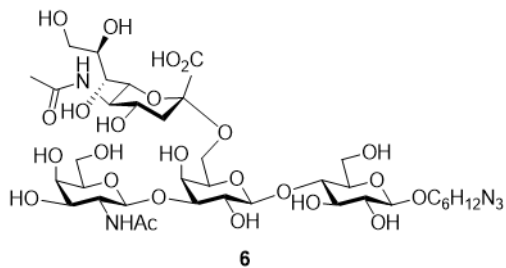

===== CHANNEL f1 =====  
NUC1 1H  
P1 10.15 usec  
PL1 -1.00 dB  
SFO1 598.1028163 MHz  
  
F2 - Processing parameters  
SI 32768  
SF 598.0999505 MHz  
WDW no  
SSB 0  
LB 0 Hz  
GB 0  
PC 2.00

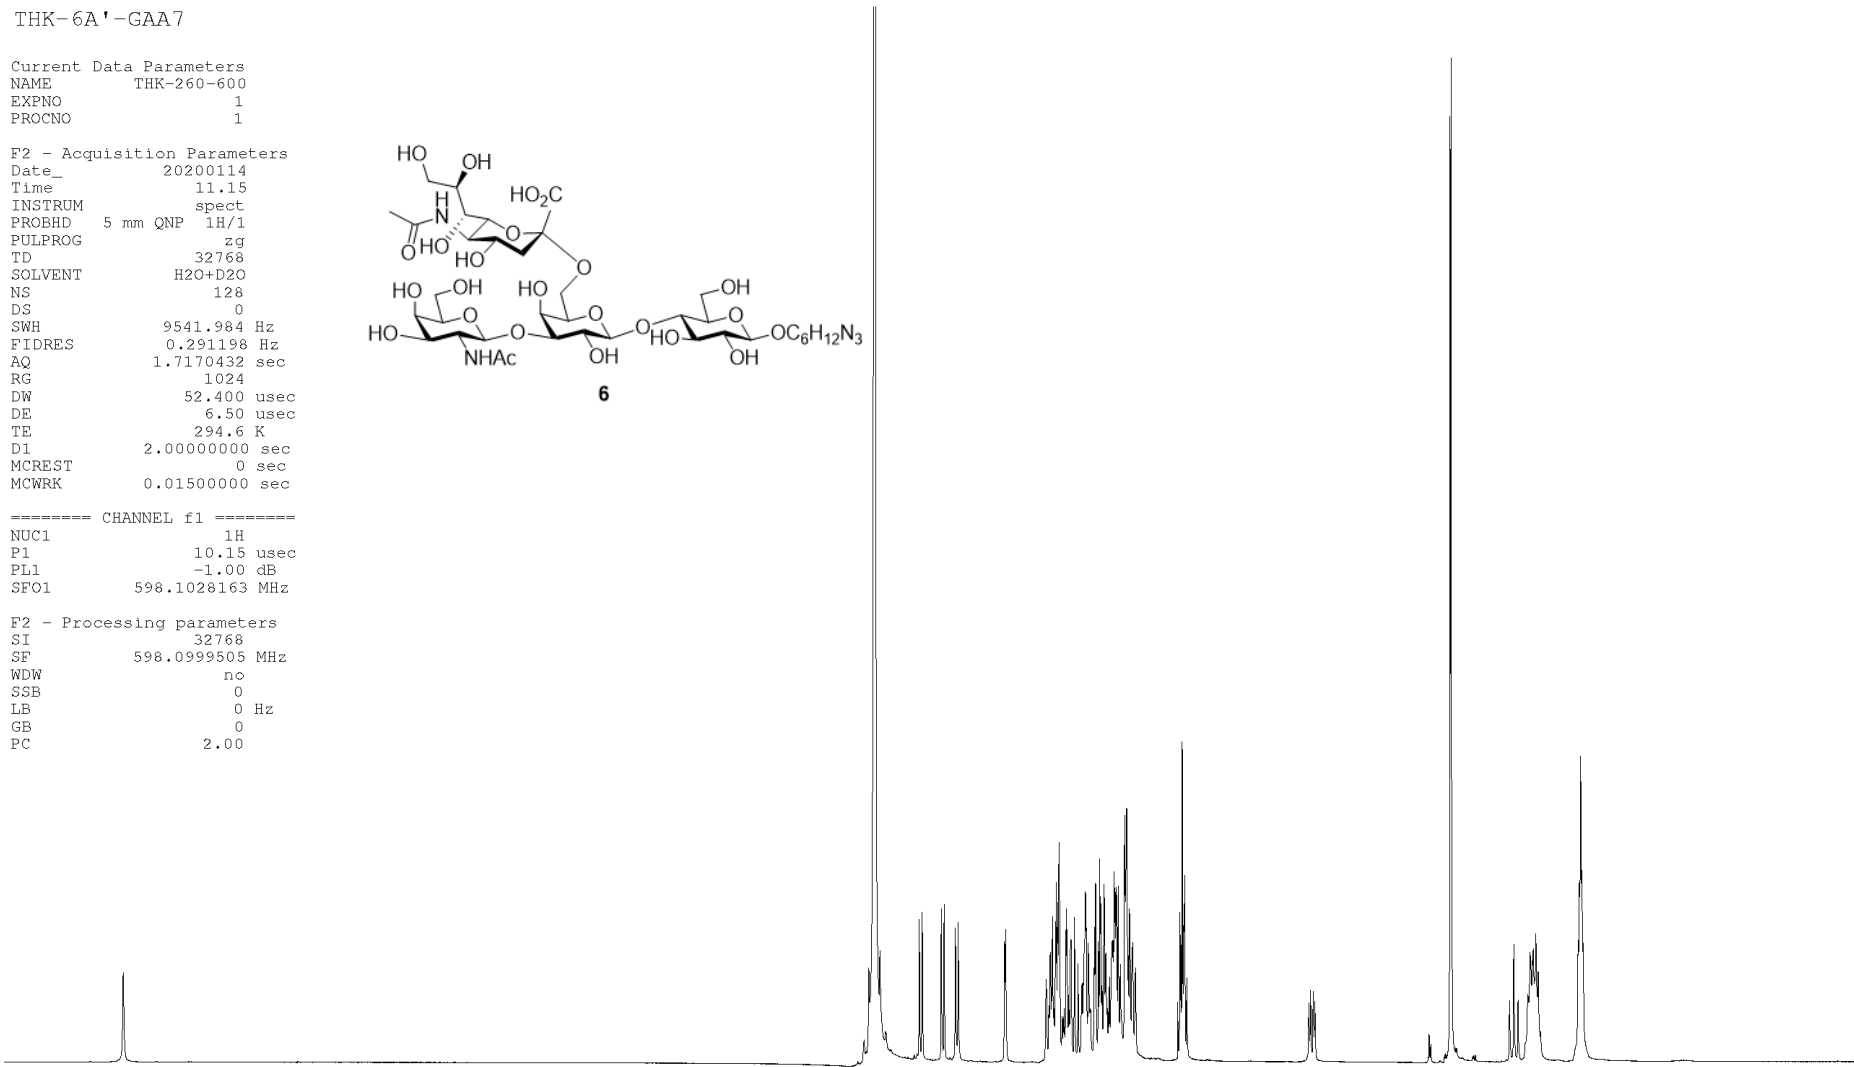

<sup>1</sup>H NMR spectrum of Compound 6 (600 MHz D<sub>2</sub>O)



THK-6A'-GAA7

Current Data Parameters  
NAME THK-260-600  
EXPNO 2  
PROCNO 1

F2 - Acquisition Parameters  
Date\_ 20200115  
Time 10.08  
INSTRUM spect  
PROBHD 5 mm QNP 1H/1  
PULPROG zgpg  
TD 32768  
SOLVENT D2O  
NS 1177  
DS 0  
SWH 45045.047 Hz  
FIDRES 1.374666 Hz  
AQ 0.3637248 sec  
RG 4096  
DW 11.100 usec  
DE 6.50 usec  
TE 294.6 K  
D1 3.5000000 sec  
d11 0.0300000 sec  
DELTA 3.4000010 sec  
MCREST 0 sec  
MCWFK 0.0150000 sec

----- CHANNEL f1 -----  
NUC1 13C  
P1 4.80 usec  
PL1 0 dB  
SFO1 150.4080927 MHz

----- CHANNEL f2 -----  
CPDPRG2 waltz16  
NUC2 1H  
PCPD2 92.00 usec  
PL2 120.00 dB  
PL12 7.00 dB  
PL13 14.00 dB  
SFO2 598.1030916 MHz

F2 - Processing parameters  
SI 65536  
SF 150.3922150 MHz  
WDW EM  
SSB 0  
LB 3.00 Hz  
GB 0  
PC 1.00

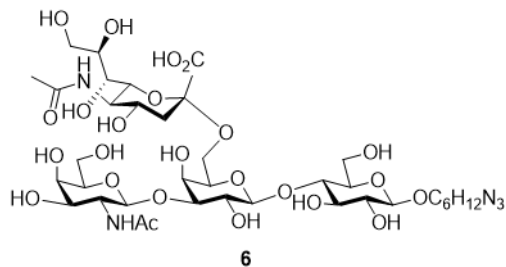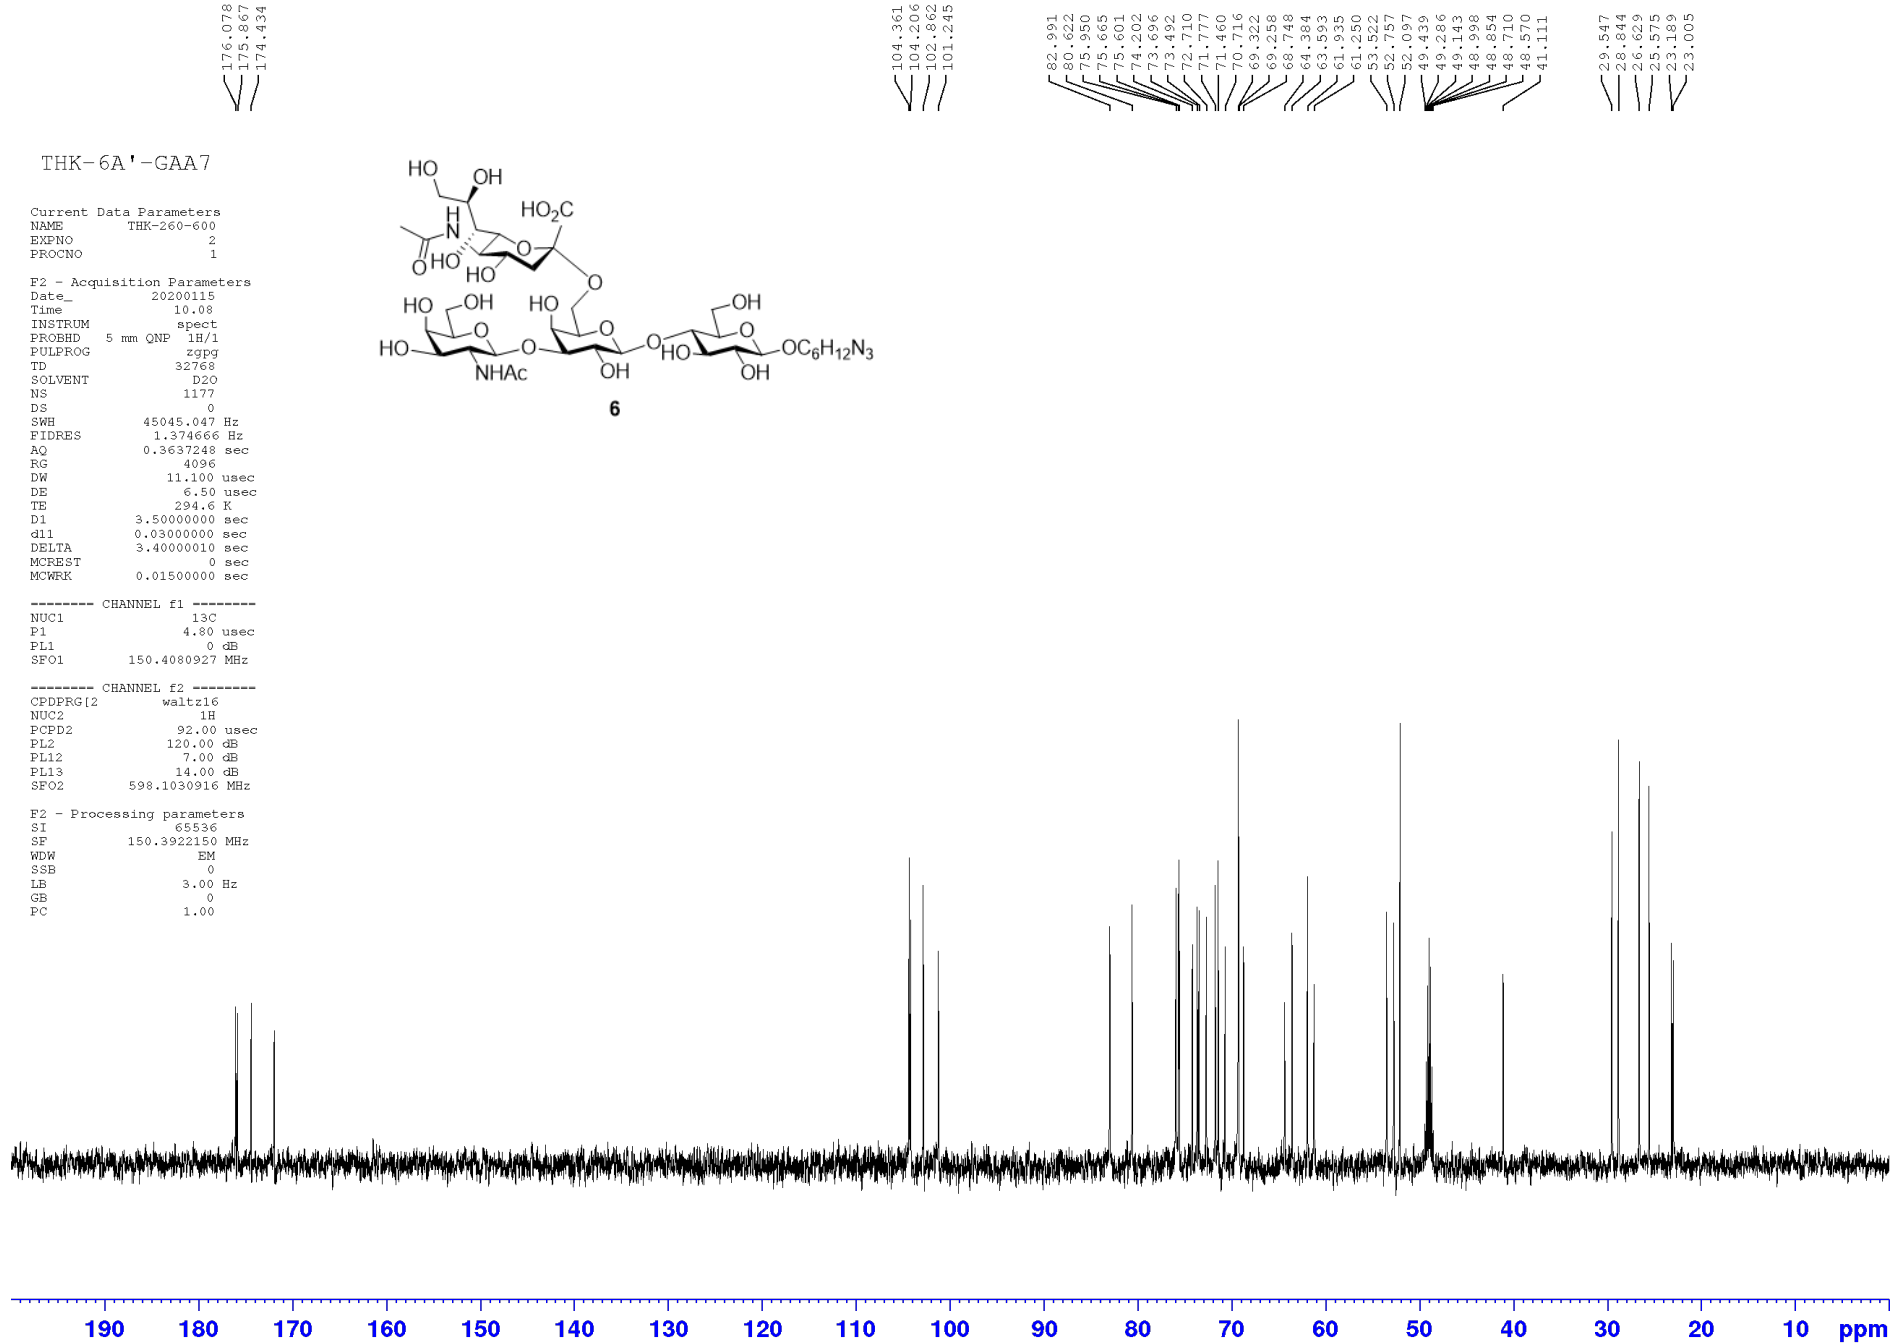

<sup>13</sup>C NMR spectrum of Compound 6 (150 MHz D<sub>2</sub>O)

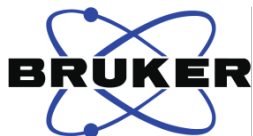

THK-6 'A-GAA7

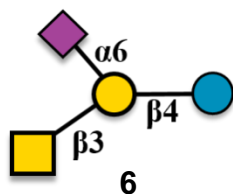

Current Data Parameters  
NAME THK-260-600  
EXPNO 11  
PROCNO 1

F2 - Acquisition Parameters  
Date\_ 20200115  
Time 12.09  
INSTRUM spect  
PROBHD 5 mm QNP 1H/1  
PULPROG cosyqf  
TD 2048  
SOLVENT MeOD  
NS 8  
DS 0  
SWH 6009.615 Hz  
FIDRES 2.934382 Hz  
AQ 0.1703936 sec  
RG 128  
DW 83.200 usec  
DE 6.50 usec  
TE 295.0 K  
d0 0.00000300 sec  
D1 1.50000000 sec  
IN0 0.00016640 sec  
MCREST 0 sec  
MCWRK 1.50000000 sec

===== CHANNEL f1 =====  
NUC1 1H  
P0 14.00 usec  
P1 12.80 usec  
PL1 -3.00 dB  
SFO1 598.1028152 MHz

F1 - Acquisition parameters  
TD 400  
SFO1 598.1028 MHz  
FIDRES 30.048077 Hz  
SW 10.048 ppm  
FnMODE QF

F2 - Processing parameters  
SI 2048  
SF 598.0999443 MHz  
WDW QSINE  
SSB 0  
LB 0 Hz  
GB 0  
PC 1.00

F1 - Processing parameters  
SI 512  
MC2 QF  
SF 598.0999504 MHz  
WDW QSINE  
SSB 0  
LB 0 Hz  
GB 0

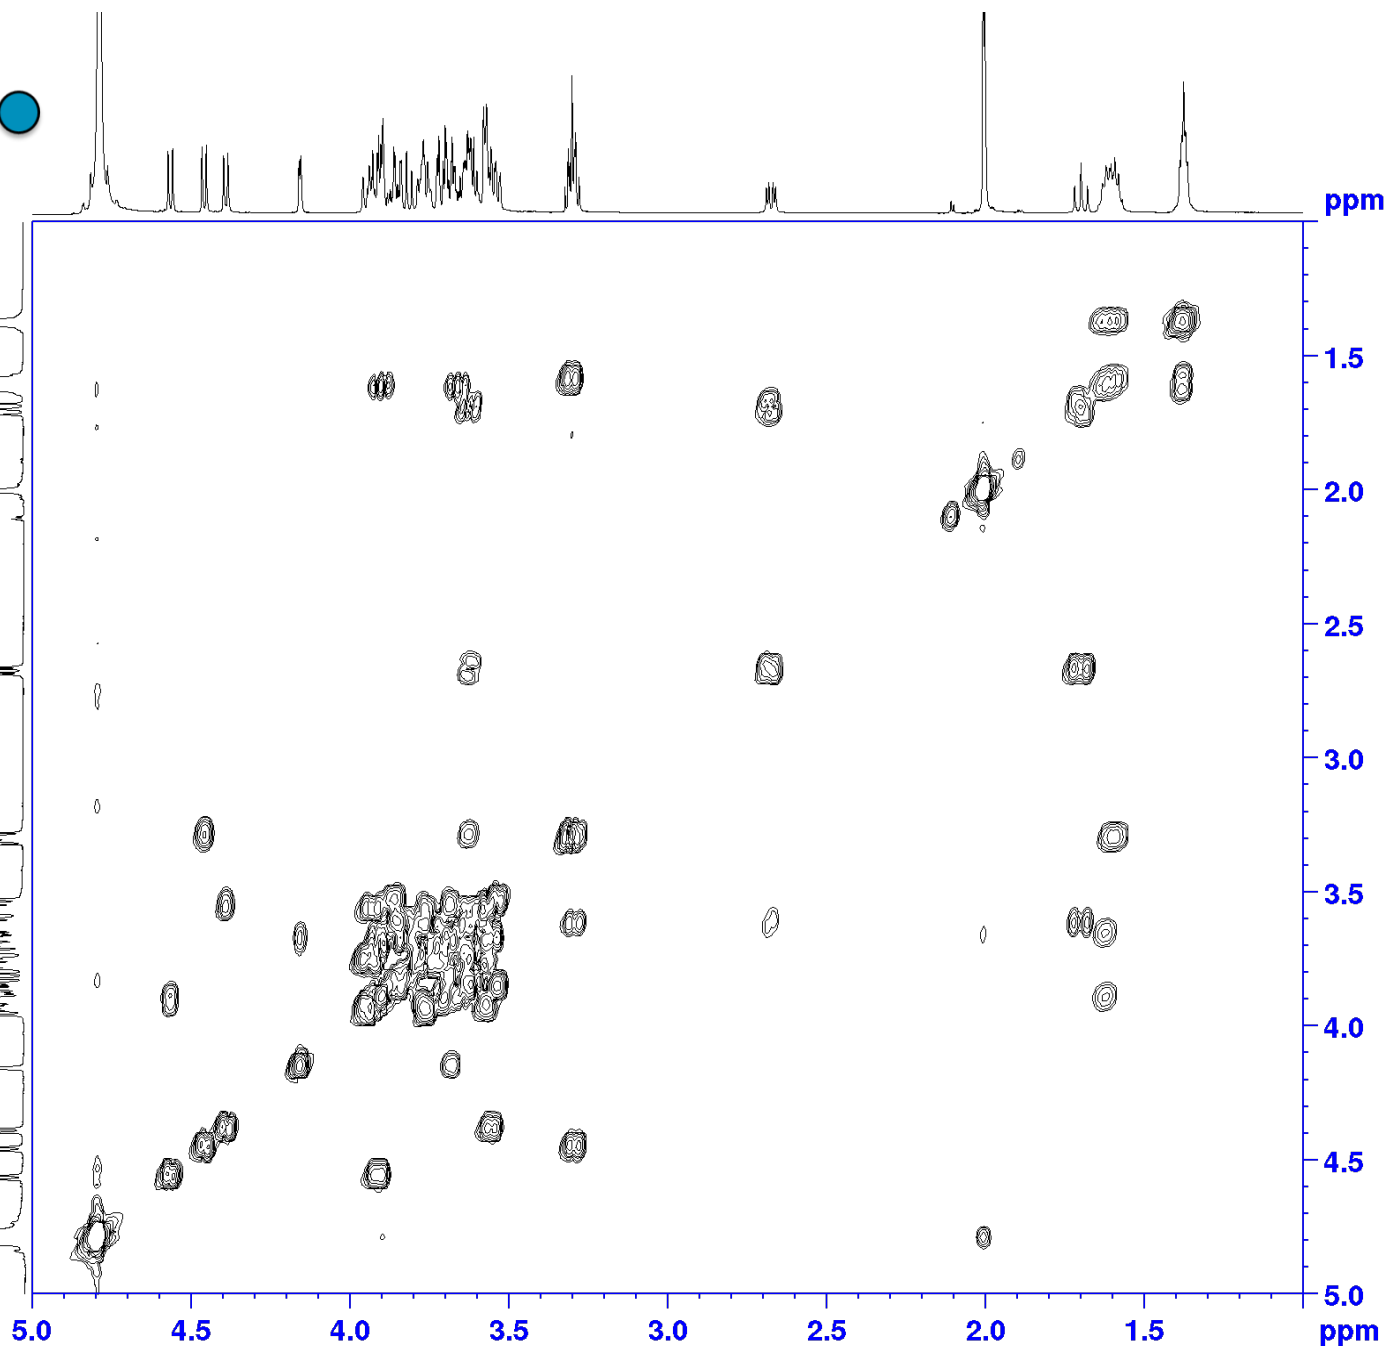

$^1\text{H}$ - $^1\text{H}$  COSY NMR spectrum of Compound 6 (600 MHz  $\text{D}_2\text{O}$ )

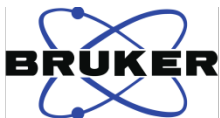

THK-6'A-GAA7

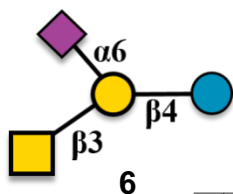

Current Data Parameters  
NAME THK-260-600  
EXPNO 12  
PROCNO 1

F2 - Acquisition Parameters  
Date\_ 20200115  
Time 13.40  
INSTRUM spect  
PROBHD 5 mm QNP 1H/1  
PULPROG hsqcetpsi  
TD 2048  
SOLVENT Acetone  
NS 14  
DS 8  
SWH 6009.615 Hz  
FIDRES 2.934382 Hz  
AQ 0.1703936 sec  
RG 14384  
DW 83.200 usec  
DE 6.50 usec  
TE 294.7 K  
CHST2 145.000000  
d0 0.00000300 sec  
D1 1.20000005 sec  
d4 0.00172414 sec  
d11 0.00000000 sec  
d13 0.00000400 sec  
D16 0.00050000 sec  
D24 0.00089000 sec  
DELTA 0.00158160 sec  
DELTA1 0.00150800 sec  
INO 0.00001511 sec  
MCREST 0 sec  
MCWREK 0.20000041 sec  
STICNT 0

----- CHANNEL f1 -----  
NUC1 1H  
P1 12.80 usec  
p2 25.60 usec  
P28 1000.00 usec  
FL1 -3.00 dB  
SFO1 598.1028152 MHz

----- CHANNEL f2 -----  
CPDPRG2 garp  
NUC2 13C  
P3 10.00 usec  
p4 20.00 usec  
PCPD2 70.00 usec  
FL2 0 dB  
FL12 20.00 dB  
SFO2 150.4042733 MHz

----- GRADIENT CHANNEL -----  
GPNAM[1] SINE.100  
GPNAM[2] SINE.100  
GPX1 0 %  
GPK2 0 %  
GPY1 0 %  
GPY2 0 %  
GPE1 80.00 %  
GPE2 20.10 %  
P16 1000.00 usec

F1 - Acquisition parameters  
TD 512  
SFO1 150.4043 MHz  
FIDRES 129.239044 Hz  
SW 219.975 ppm  
FaMODE Echo-Antiecho

F2 - Processing parameters  
SI 2048  
SF 598.0999701 MHz  
WDW QSINE  
SFB 4  
LB 0 Hz  
GB 0  
FC 1.00

F1 - Processing parameters  
SI 512  
MC2 echo-antiecho  
SF 150.3922119 MHz  
WDW QSINE  
SFB 4  
LB 0 Hz  
GB 0

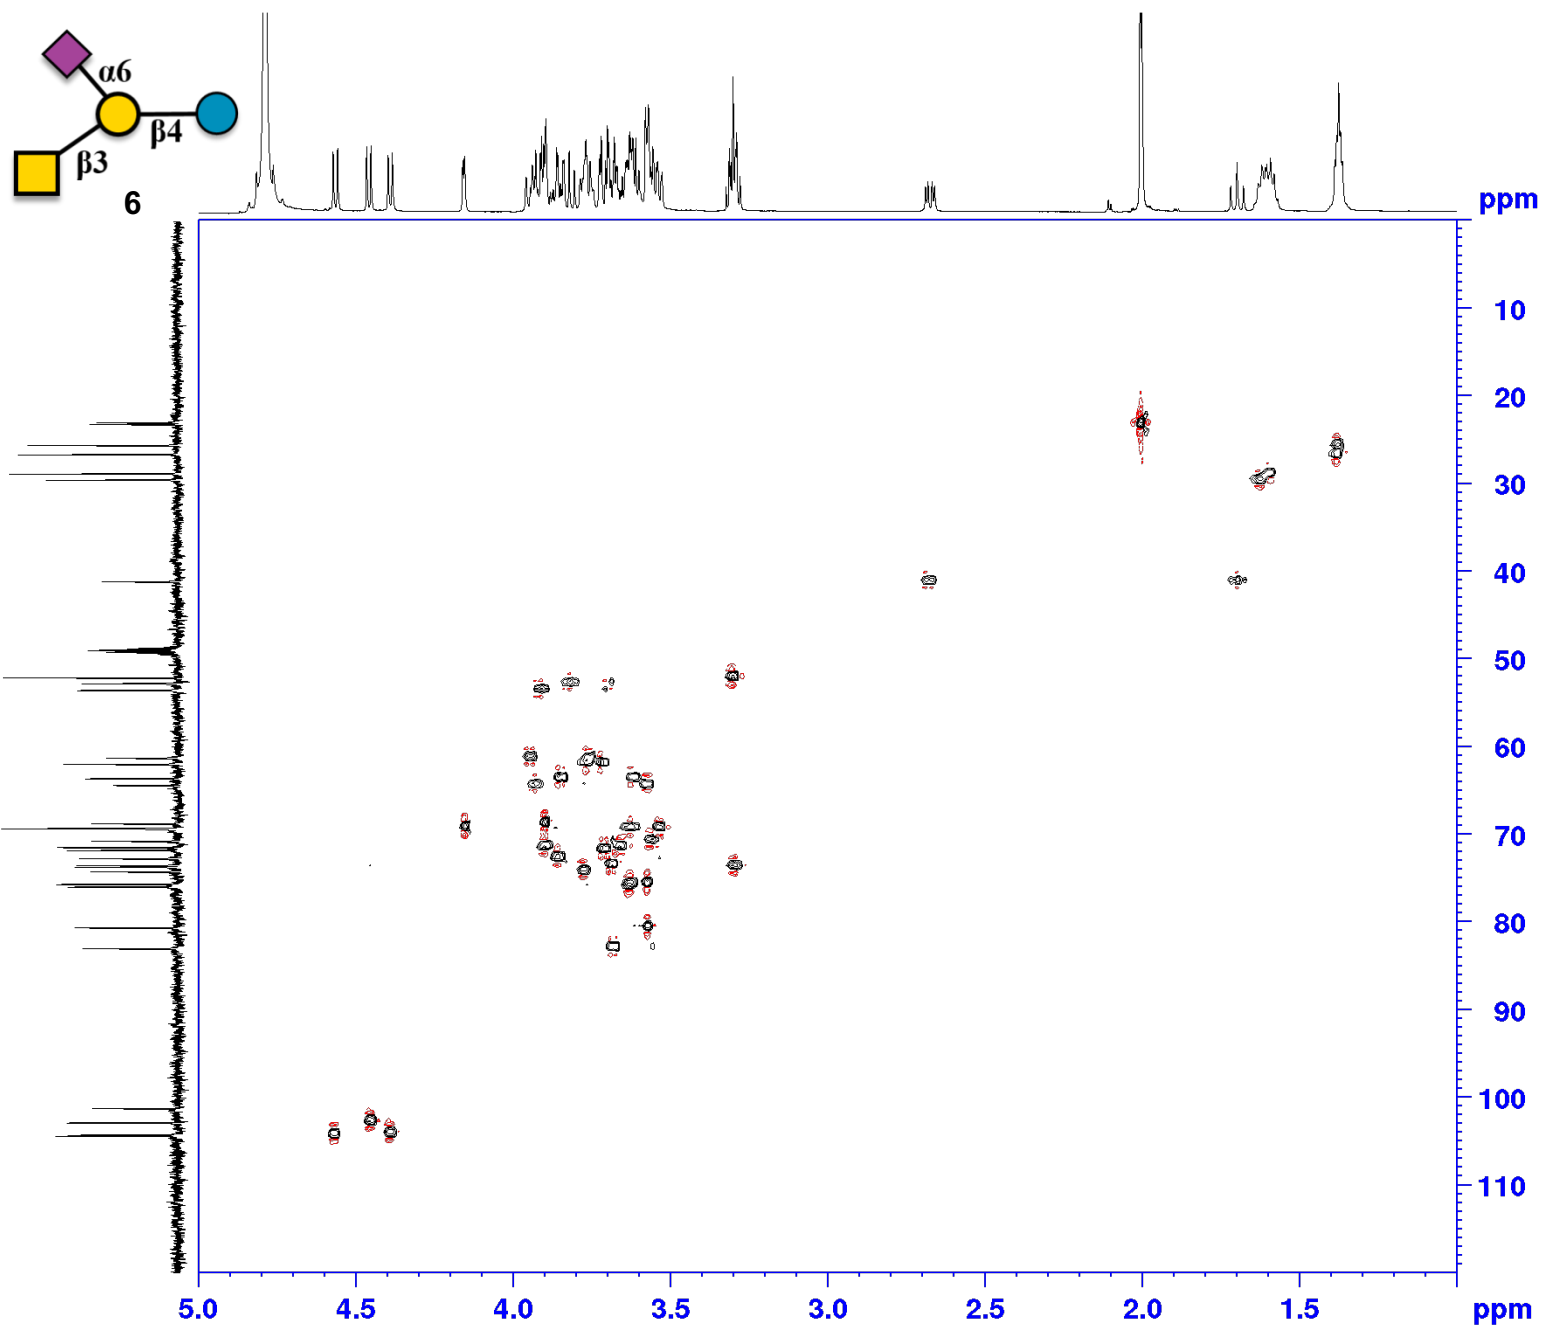

$^1\text{H}$ - $^{13}\text{C}$  HSQC NMR spectrum of Compound 6 (600 MHz/150 MHz  $\text{D}_2\text{O}$ )

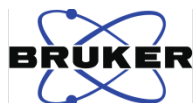

THK-6'A-GAA7

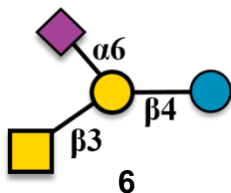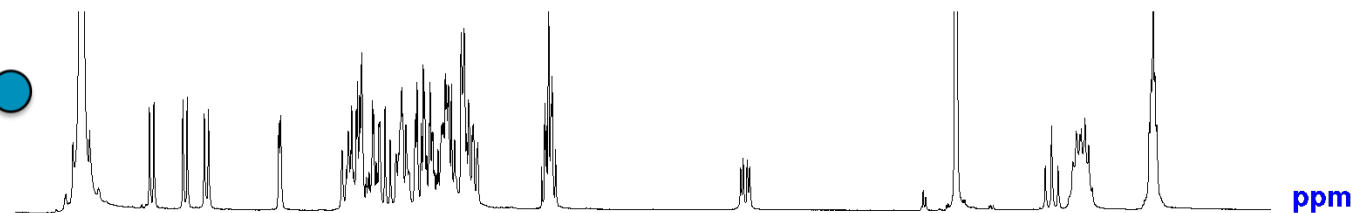

```
Current Data Parameters
NAME      THK-260-600
EXPNO     13
PROCNO    1

F2 - Acquisition Parameters
Date_     20200115
Time      16.51
INSTRUM   spect
PROBHD    5 mm QNP 1H/1
PULPROG   hmbcpg1pdqdf
TD         2048
SOLVENT   Acetone
NS         32
DS         0
SWH        6009.615 Hz
FIDRES     2.934382 Hz
AQ         0.1703936 sec
RG         32768
DW         83.200 usec
DE         6.00 usec
TE         295.8 K
CNST12    145.0000000
CNST13    8.0000000
d0         0.00000300 sec
D1         1.20000005 sec
d2         0.00344828 sec
d6         0.06250000 sec
D16        0.00050000 sec
INO        0.00001662 sec
MCREST    0 sec
MCWREK    1.20000005 sec

===== CHANNEL f1 =====
NUC1       1H
P1         12.80 usec
p2         25.60 usec
PL1        -3.00 dB
SFO1       598.1028152 MHz

===== CHANNEL f2 =====
NUC2       13C
P3         10.50 usec
PL2         0 dB
SFO2       150.4042733 MHz

===== GRADIENT CHANNEL =====
GENAM[1]   SINE.100
GENAM[2]   SINE.100
GENAM[3]   SINE.100
GPX1        0 %
GPX2        0 %
GPX3        0 %
GPY1        0 %
GPY2        0 %
GPY3        0 %
GZ11        50.00 %
GZ22        30.00 %
GZ23        40.10 %
P16         1000.00 usec

F1 - Acquisition parameters
TD         512
SFO1       150.4043 MHz
FIDRES     117.481201 Hz
SW         199.962 ppm
FqMODE     QF

F2 - Processing parameters
SI         4096
SF         598.0999445 MHz
WDW        QSINE
SSB        2
LB         0 Hz
GB         0
PC         1.00

F1 - Processing parameters
SI         512
MC2        QF
SF         150.3922056 MHz
WDW        SINE
SSB        0
LB         0 Hz
GB         0
```

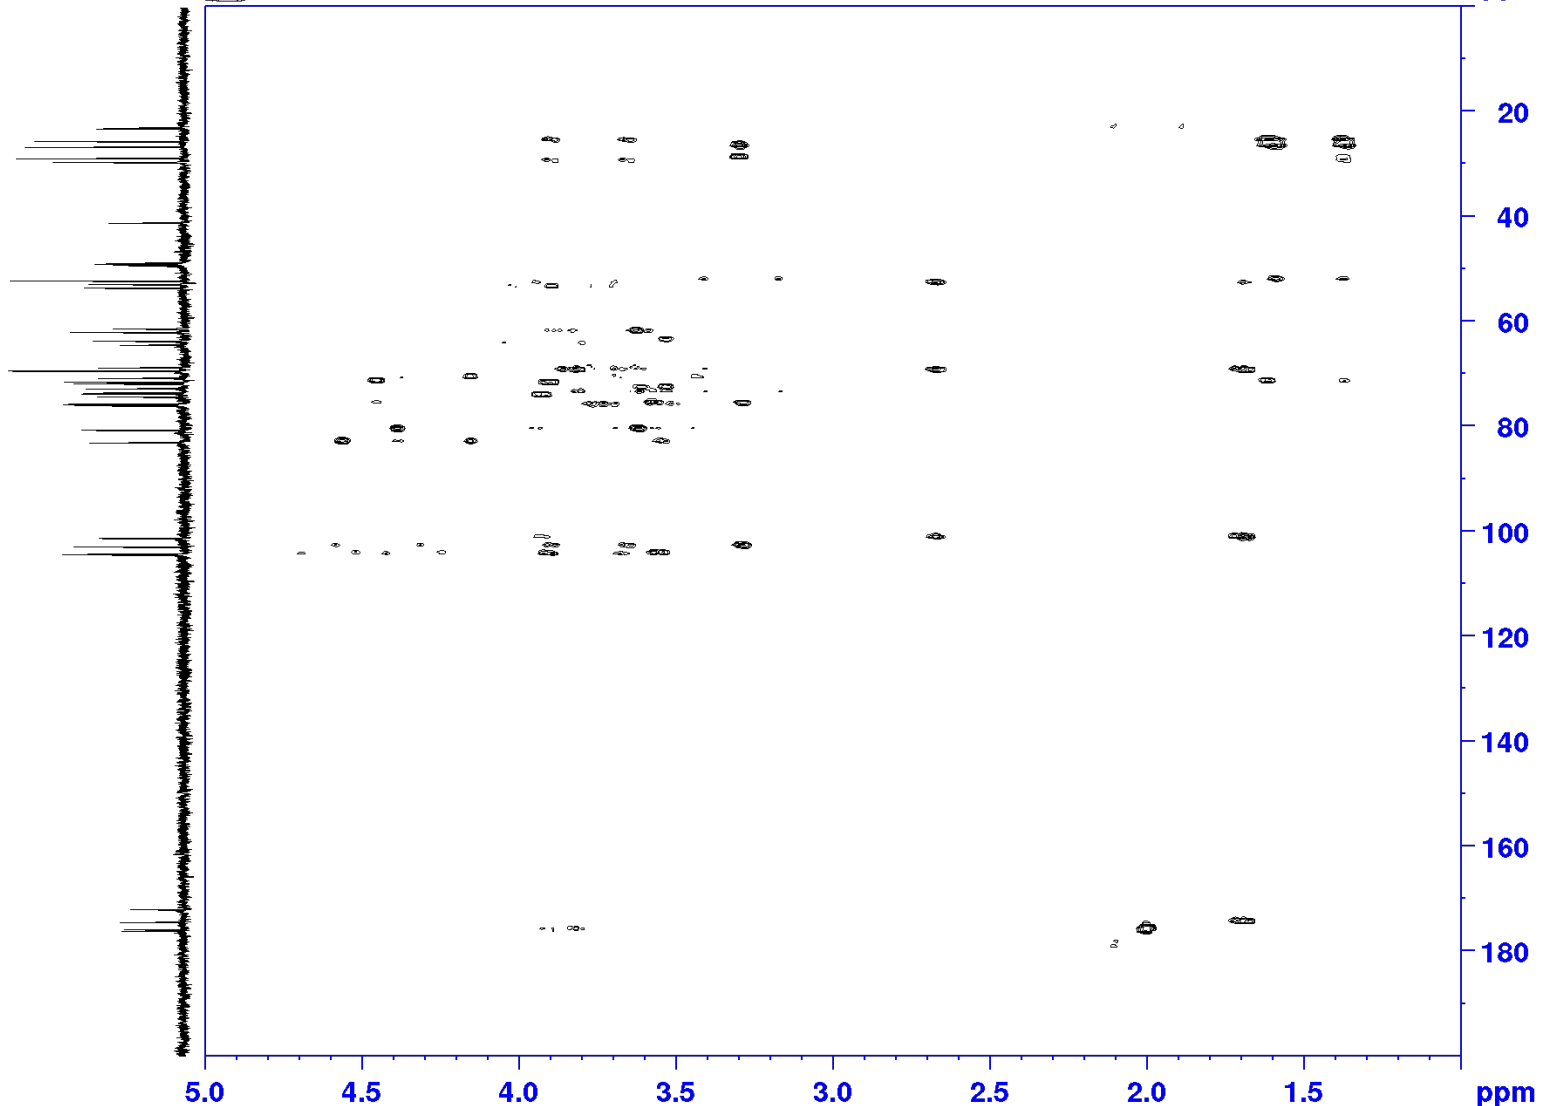

$^1\text{H}$ - $^{13}\text{C}$  HMBC NMR spectrum of Compound 6 (600 MHz/150 MHz  $\text{D}_2\text{O}$ )

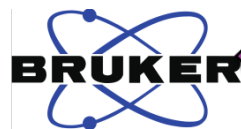

THK-6 'A-GAA7

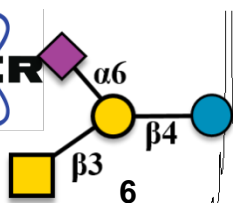

Current Data Parameters  
NAME THK-260-600  
EXPNO 14  
PROCNO 1

F2 - Acquisition Parameters  
Date\_ 20200115  
Time 23:28  
INSTRUM spect  
PROBHD 5 mm QNP 1H/1  
PULPROG hzgpgp1ph  
TD 2048  
SOLVENT cdcl3  
NS 32  
DS 8  
SWH 6009.615 Hz  
FIDRES 2.794362 Hz  
AQ 0.1703296 sec  
RG 32768  
DW 83.200 usec  
DE 6.50 usec  
TE 294.6 K  
CNST2 145.0000000  
d0 0.0000000 sec  
d1 1.2000000 sec  
d4 0.00172414 sec  
d9 0.07500000 sec  
d11 0.03000000 sec  
d13 0.00000400 sec  
d16 0.00100000 sec  
DELTA 0.00200000 sec  
DELTA1 0.00003160 sec  
FACTOR1 8  
LNO 0.00001511 sec  
l1 48  
MOREST 0 sec  
MGATE 0.60000002 sec  
SCALE1

===== CHANNEL f1 =====  
NUC1 1H  
P1 12.80 usec  
p2 25.60 usec  
p3 16.67 usec  
p6 25.00 usec  
p7 30.00 usec  
P17 1000.00 usec  
P28 1000.00 usec  
PL1 -3.00 dB  
PL10 4.00 dB  
SFO1 598.1026152 MHz

===== CHANNEL f2 =====  
CPDPRG2 gars  
NUC2 13C  
P3 10.00 usec  
p4 20.00 usec  
PCPD2 70.00 usec  
PL2 0 dB  
PL12 20.00 dB  
SFO2 150.4042753 MHz

===== GRADIENT CHANNEL =====  
GENAM[1] SINE.100  
GENAM[2] SINE.100  
GENAM[3] SINE.100  
GPR1 0 %  
GPR2 0 %  
GPR3 0 %  
GPR4 0 %  
GPR5 0 %  
GPR6 0 %  
GPR7 80.00 %  
GPR8 30.00 %  
GPR9 20.10 %  
P16 1000.00 usec

F1 - Acquisition parameters  
TD 400  
SFO1 150.4043 MHz  
FIDRES 163.423964 Hz  
SW 219.975 ppm  
F1MODE TPFI

F2 - Processing parameters  
SI 2048  
SF 598.0999770 MHz  
WDW QSINE  
SSB 3  
LB 0 Hz  
GB 0  
PC 1.00

F1 - Processing parameters  
SI 512  
MC2 TPFI  
SF 150.3922131 MHz  
WDW QSINE  
SSB 3  
LB 0 Hz  
GB 0

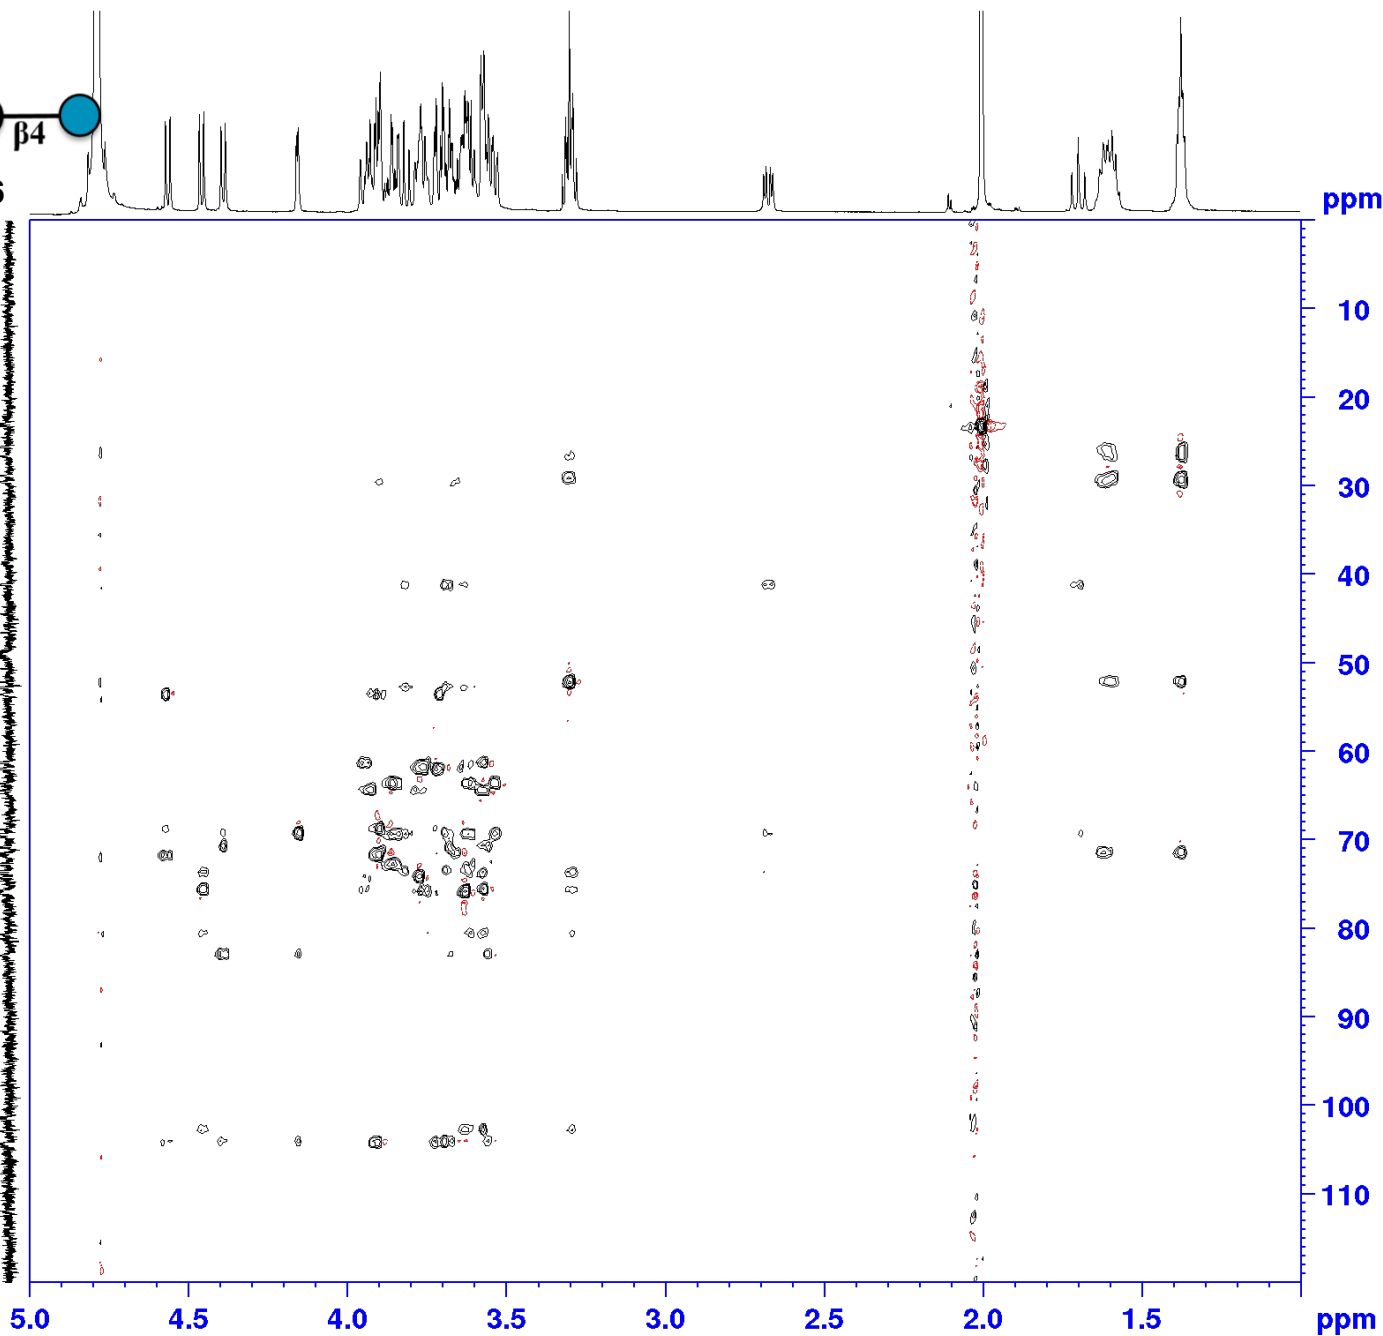

$^1\text{H}$ - $^{13}\text{C}$  HSQC-TOCSY NMR spectrum of Compound 6 (600 MHz/150 MHz  $\text{D}_2\text{O}$ )

THK-6A6'A-GAA7

Current Data Parameters  
NAME THK-261-20200201-1H.fid  
EXPNO 1  
PROCNO 1

F2 - Processing parameters  
SI 16384  
SF 499.7888646 MHz  
WDW EM  
SSB 0  
LB 0.30 Hz  
GB 0  
PC 1.00

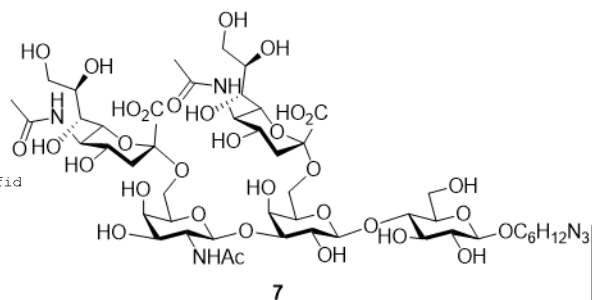

4.7899  
4.5881  
4.5712  
4.4638  
4.4476  
4.3945  
4.3786  
4.1181  
4.1129  
3.9841  
3.9629  
3.9505  
3.9408  
3.9339  
3.9227  
3.9171  
3.9095  
3.8886  
3.8711  
3.8631  
3.8584  
3.8427  
3.8344  
3.8137  
3.8033  
3.7994  
3.7881  
3.7793  
3.7684  
3.7483  
3.7286  
3.7234  
3.7087  
3.7003  
3.6893  
3.6735  
3.6652  
3.6476  
3.6306  
3.6164  
3.6049  
3.5917  
3.5807  
3.5688  
3.5594  
3.5413  
3.5317  
3.5262  
3.5058  
3.3132  
3.2986  
3.2848  
2.7184  
2.7094  
2.6938  
2.6850  
2.6846  
2.6830  
2.6673  
2.6585  
2.0060  
1.2.0004  
1.1.9978  
1.1.7468  
1.1.7222  
1.1.6977  
1.1.6742  
1.1.6496  
1.1.6250  
1.1.6176  
1.1.6038  
1.1.5901  
1.1.5745  
1.1.5622  
1.1.3834  
1.1.3809  
1.1.3730  
1.1.3659  
1.1.3588

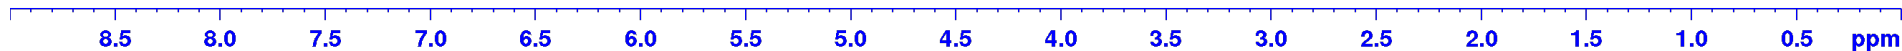

<sup>1</sup>H NMR spectrum of Compound 7 (500 MHz D<sub>2</sub>O)

176.026  
176.007  
175.792  
174.425

104.166  
103.997  
102.820  
101.466  
101.231  
82.520  
80.842  
75.721  
75.563  
74.450  
74.104  
73.663  
73.622  
73.437  
72.678  
72.595  
71.648  
71.437  
70.914  
69.414  
69.375  
69.333  
69.161  
69.079  
68.555  
64.861  
64.163  
63.633  
63.595  
61.252  
53.443  
52.948  
52.730  
52.087  
49.514  
49.342  
49.169  
48.996  
48.824  
48.651  
48.479  
41.230  
41.034  
39.539  
28.839  
26.624  
25.570  
23.186  
23.017  
22.990

THK-6A6A'-GAA7

Current Data Parameters  
 NAME THK-261-20200201-13c.fid  
 EXPNO 1  
 PROCNO 1  
 F2 - Processing parameters  
 SI 65536  
 SF 125.6718952 MHz  
 WDW EM  
 SSB 0  
 LB 0.30 Hz  
 GB 0  
 PC 1.00

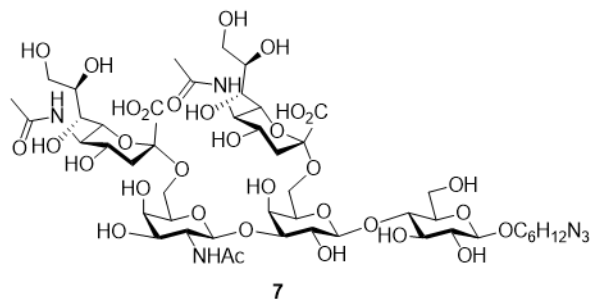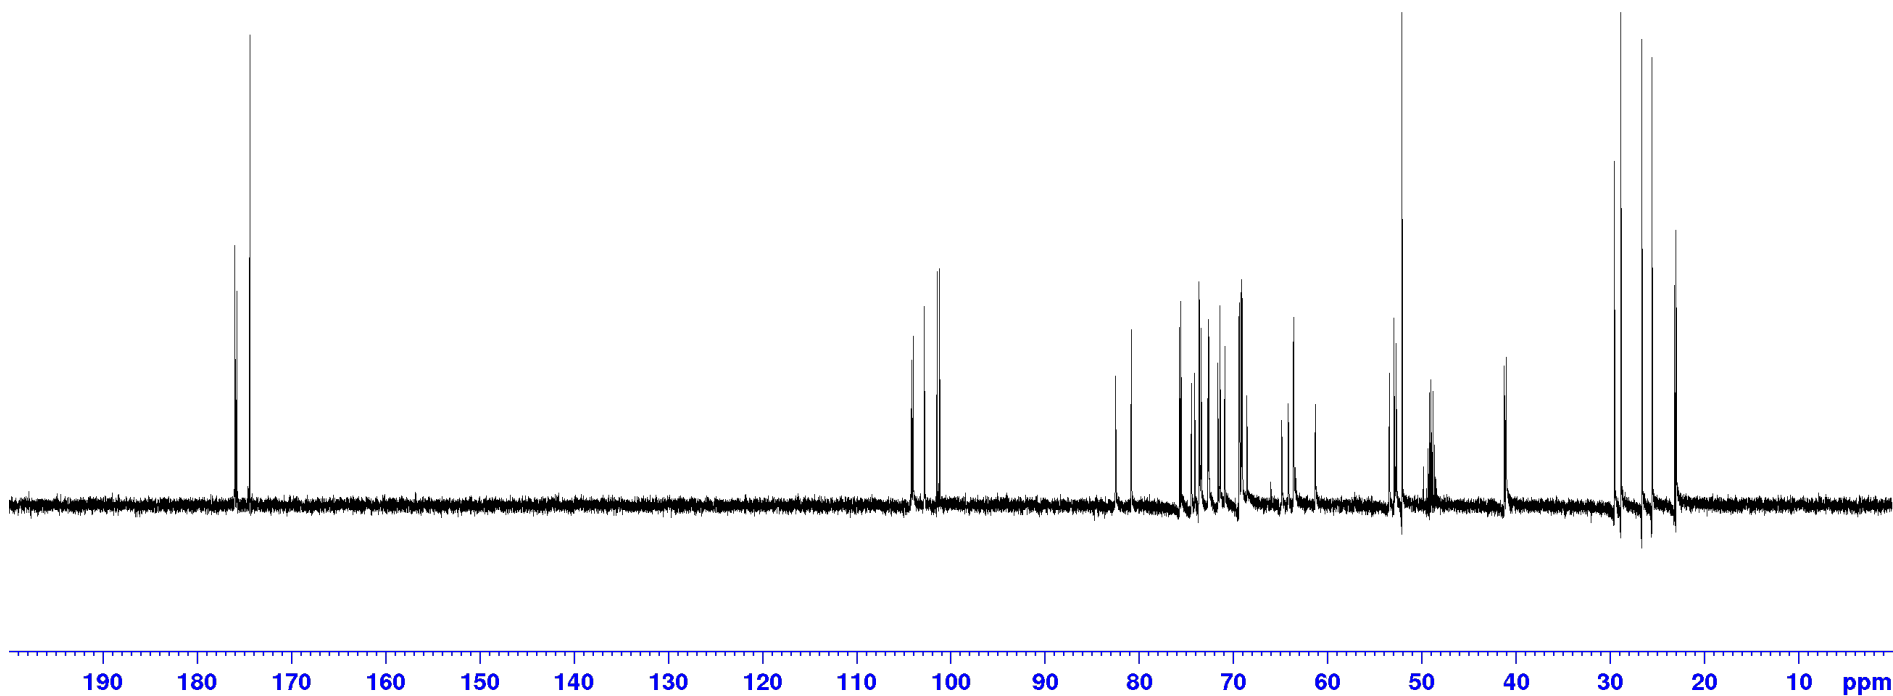

<sup>1</sup>H NMR spectrum of Compound 7 (500 MHz D<sub>2</sub>O)

THK-6A3A-GAA7

Current Data Parameters  
NAME CCLin-THK-GAA7-AA-H.fic  
EXPNO 1  
PROCNO 1  
F2 - Processing parameters  
SI 65536  
SF 699.7447850 MHz  
WDW EM  
SSB 0  
LB 0.30 Hz  
GB 0  
PC 1.00

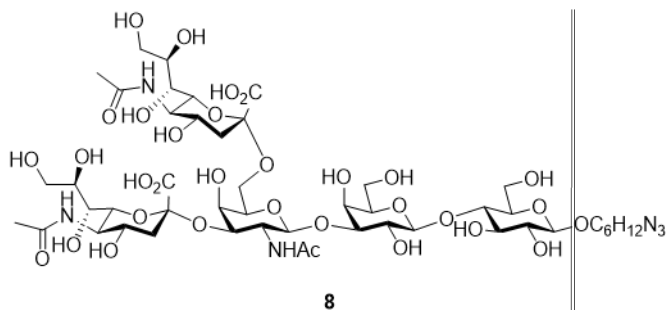

4.7899  
4.7219  
4.7097  
4.4909  
4.4794  
4.4400  
4.4286  
4.1981  
4.1944  
4.1796  
3.9882  
3.9788  
3.9727  
3.9667  
3.9629  
3.9517  
3.9477  
3.9353  
3.9314  
3.9213  
3.9114  
3.9013  
3.8871  
3.8701  
3.8480  
3.8334  
3.8181  
3.8128  
3.8052  
3.7997  
3.7848  
3.7707  
3.7557  
3.7419  
3.7343  
3.7242  
3.7172  
3.7091  
3.6976  
3.6937  
3.6864  
3.6834  
3.6744  
3.6660  
3.6577  
3.6489  
3.6413  
3.6348  
3.6316  
3.6202  
3.6067  
3.5931  
3.5792  
3.5686  
3.5553  
3.4879  
3.4731  
3.3415  
3.3317  
3.3224  
3.3110  
2.7158  
2.7089  
2.7055  
2.6982  
2.6912  
2.6876  
2.6809  
2.0837  
2.0386  
2.0306  
1.7439  
1.7264  
1.7090  
1.6587  
1.6488  
1.6396  
1.6315  
1.6225  
1.6135  
1.6033  
1.4154  
1.4106  
1.4055  
1.4004  
1.3949

8.5 8.0 7.5 7.0 6.5 6.0 5.5 5.0 4.5 4.0 3.5 3.0 2.5 2.0 1.5 1.0 0.5 ppm

1.13  
1.01  
1.00  
1.96  
9.35  
5.37  
10.32  
6.24  
0.99  
3.10  
2.02  
8.90  
1.01  
5.13  
4.11

$^1\text{H}$  NMR spectrum of Compound 8 (700 MHz  $\text{D}_2\text{O}$ )



THK-6A3A-GAA7

Current Data Parameters  
 NAME CCLin-THK-GAA7-AA-C.fic  
 EXPNO 1  
 PROCNO 1  
 F2 - Processing parameters  
 SI 131072  
 SF 175.9508124 MHz  
 WDW EM  
 SSB 0  
 LB 0.30 Hz  
 GB 0  
 PC 1.00

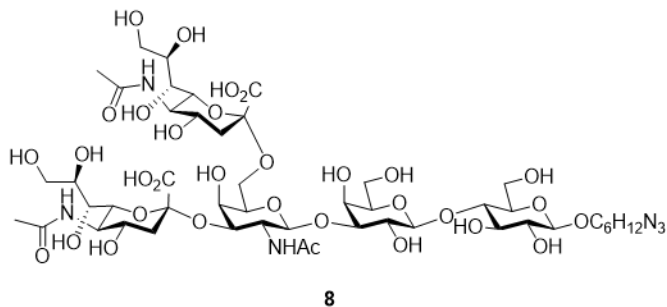

176.140  
 175.864  
 175.840  
 175.065  
 174.395

104.141  
 103.837  
 102.847  
 101.235  
 100.506  
 82.944  
 80.679  
 75.696  
 75.659  
 75.576  
 74.214  
 73.818  
 73.735  
 73.678  
 73.465  
 72.679  
 72.608  
 71.436  
 70.682  
 69.326  
 69.302  
 69.292  
 69.210  
 68.999  
 67.969  
 64.399  
 63.581  
 63.541  
 61.938  
 61.237  
 52.820  
 52.742  
 52.085  
 49.368  
 49.245  
 49.121  
 48.998  
 48.875  
 48.752  
 48.628  
 41.081  
 40.597  
 39.530  
 28.824  
 26.612  
 25.557  
 23.358  
 23.000  
 22.938

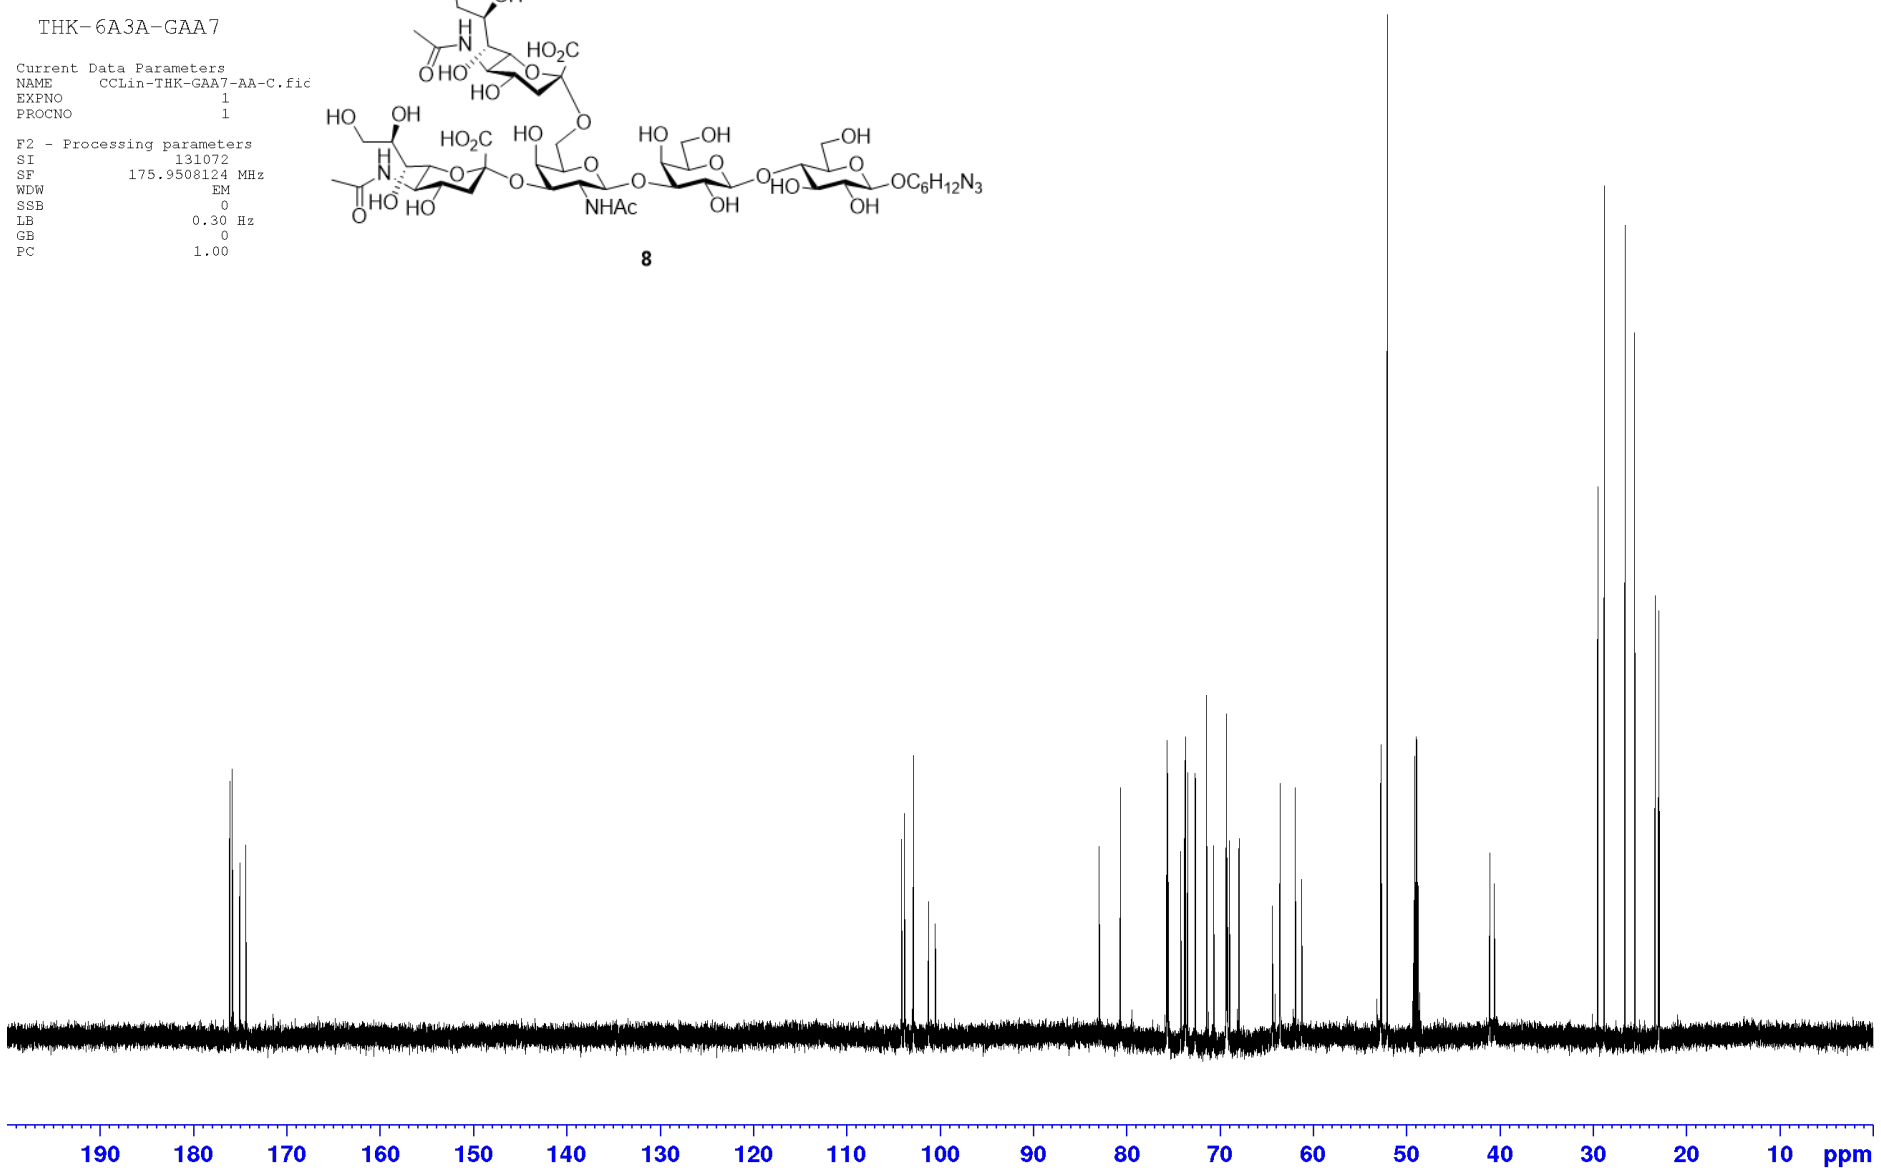

<sup>13</sup>C NMR spectrum of Compound 8 (175 MHz D<sub>2</sub>O)

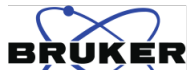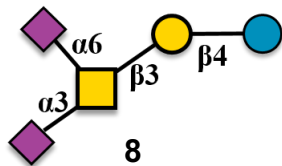

THK-6A3A-GAA-7

Current Data Parameters  
NAME THK-GAA7-AA-180604  
EXPNO 11  
PROCNO 1

F2 - Acquisition Parameters  
Date\_ 20180604  
Time 9.48  
INSTRUM spect  
PROBHD 5 mm QNP 1H/1  
PULPROG cosyqf  
TD 2048  
SOLVENT H2O+D2O  
NS 16  
DS 0  
SWH 6009.615 Hz  
FIDRES 2.934382 Hz  
AQ 0.1703936 sec  
RG 128  
DW 83.200 usec  
DE 6.50 usec  
TE 299.8 K  
d0 0.00000300 sec  
D1 1.50000000 sec  
IN0 0.00016640 sec  
MCREST 0 sec  
MCWRK 1.50000000 sec

===== CHANNEL f1 =====  
NUC1 1H  
P0 14.00 usec  
P1 14.00 usec  
PL1 -2.00 dB  
SFO1 598.3028186 MHz

F1 - Acquisition parameters  
TD 256  
SFO1 598.3028 MHz  
FIDRES 46.950119 Hz  
SW 10.044 ppm  
FnMODE QF

F2 - Processing parameters  
SI 2048  
SF 598.2999500 MHz  
WDW QSINE  
SSB 0  
LB 0 Hz  
GB 0  
PC 1.00

F1 - Processing parameters  
SI 512  
MC2 QF  
SF 598.2999530 MHz  
WDW QSINE  
SSB 0  
LB 0 Hz  
GB 0

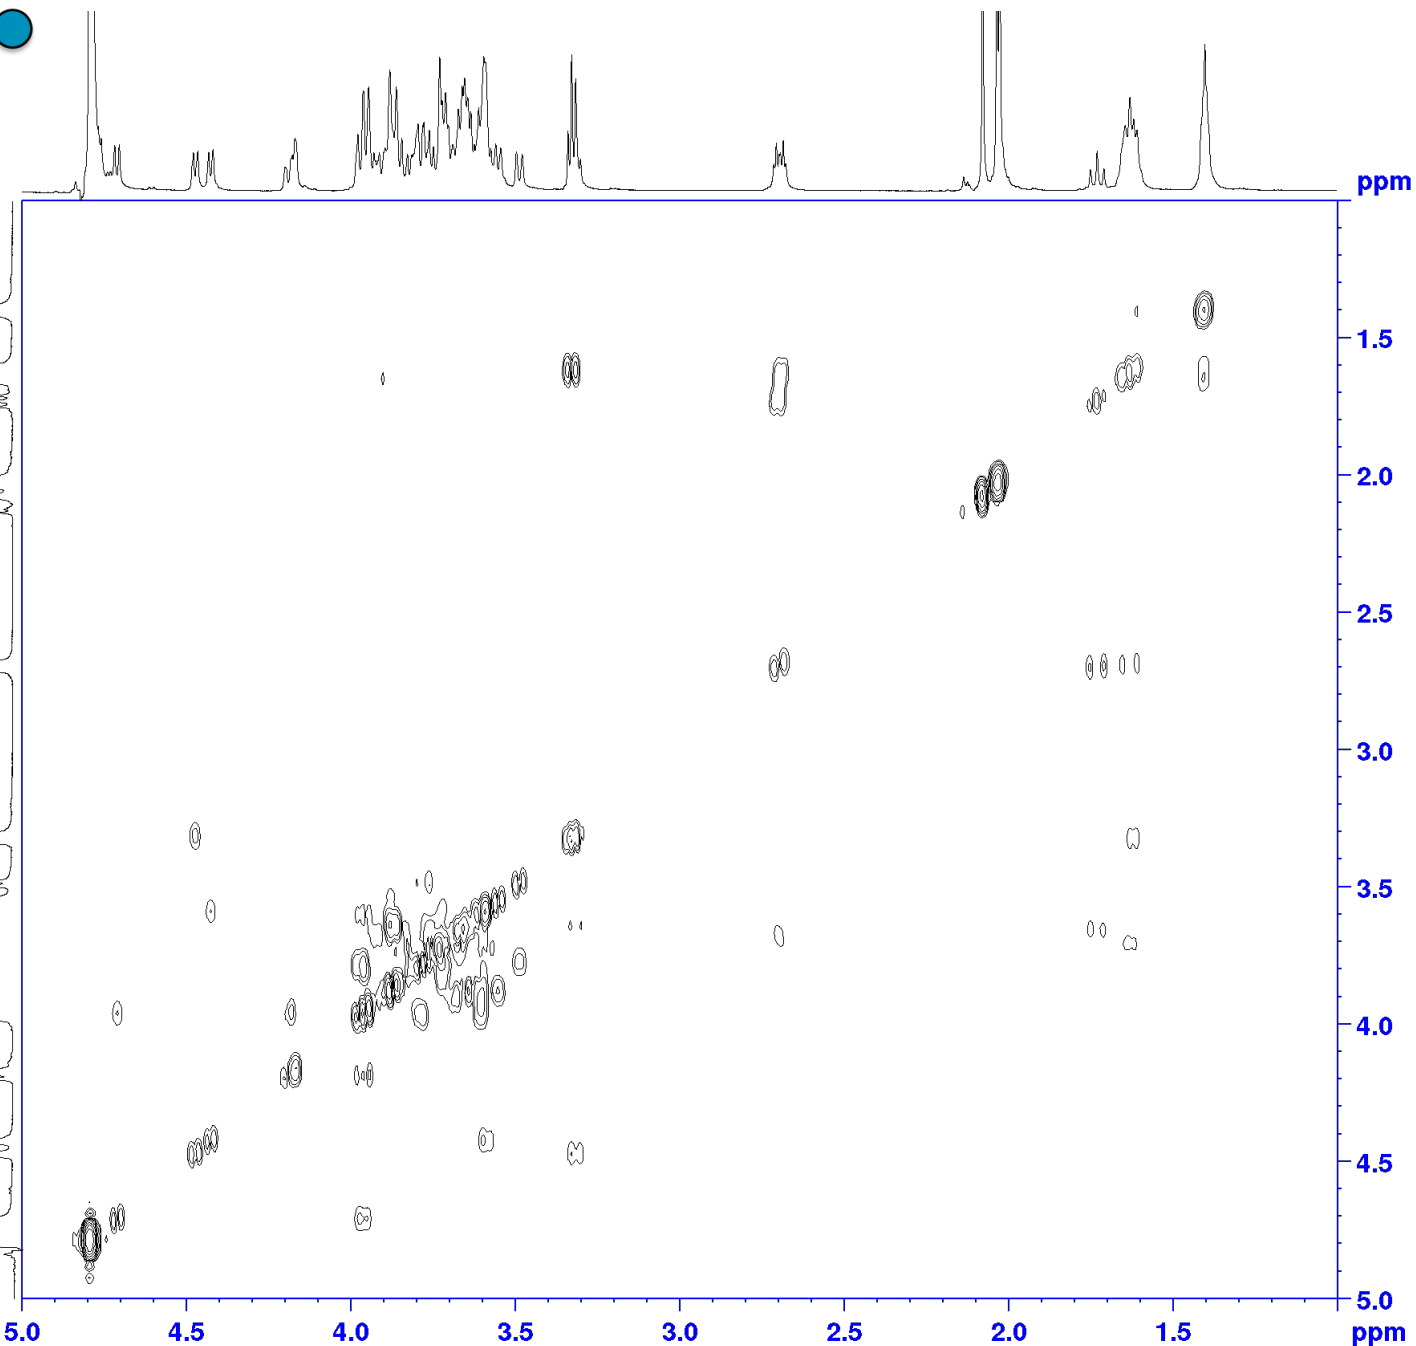

$^1\text{H}$ - $^1\text{H}$  COSY NMR spectrum of Compound **8** (600 MHz  $\text{D}_2\text{O}$ )

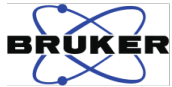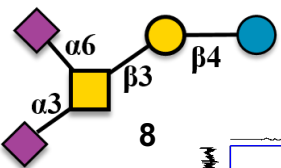

THK-6A3A-GAA-7

Current Data Parameters  
NAME THK-GAA7-AA-180604  
EXPNO 12  
PROCNO 1

F2 - Acquisition Parameters  
Date\_ 20180605  
Time 6.42  
INSTRUM spect  
PROBHD 5 mm QNP 1H/1  
PULPROG hsqcztgpa1  
TD 2048  
SOLVENT D2O  
NS 8  
DS 8  
SWH 6009.615 Hz  
FIDRES 2.984382 Hz  
RQ 0.1703926 sec  
RG 32768  
DW 83.200 usec  
DE 4.50 usec  
TE 297.8 K  
CHET2 145.0000000  
d0 0.0000000 sec  
D1 1.5000000 sec  
d4 0.00172414 sec  
d11 0.0300000 sec  
d13 0.00000400 sec  
d16 0.00080000 sec  
E24 0.00089000 sec  
DELTA 0.00157700 sec  
DELTA1 0.00150800 sec  
TMO 0.00001385 sec  
MORSET 0 sec  
MORWT 0.25000051 sec  
STICNT 0

----- CHANNEL f1 -----  
NUC1 1H  
P1 10.50 usec  
P2 21.00 usec  
P28 1000.00 usec  
PL1 -3.00 dB  
SFO1 598.3028186 MHz

----- CHANNEL f2 -----  
CPDPRG2 sarp  
NUC2 13C  
P3 10.00 usec  
P4 20.00 usec  
PCPD2 70.00 usec  
PL2 0 dB  
PL12 20.00 dB  
SFO2 150.4539382 MHz

----- GRADIENT CHANNEL -----  
GPNAM[1] SINE.100  
GPNAM[2] SINE.100  
GPA1 0 %  
GPA2 0 %  
GPA3 0 %  
GPA4 0 %  
GPE1 80.00 %  
GPE2 20.10 %  
PL6 1000.00 usec

F1 - Acquisition parameters  
TD 300  
SFO1 150.4539 MHz  
FIDRES 240.673889 Hz  
SW 239.948 ppm  
FAMODE Echo-Antiecho

F2 - Processing parameters  
SI 2048  
SF 598.2999530 MHz  
WDW QSIINE  
SSB 4  
LB 0 Hz  
GB 0  
PC 1.00

F1 - Processing parameters  
SI 512  
MC2 echo-antiecho  
SF 150.4425044 MHz  
WDW QSIINE  
SSB 4  
LB 0 Hz  
GB 0

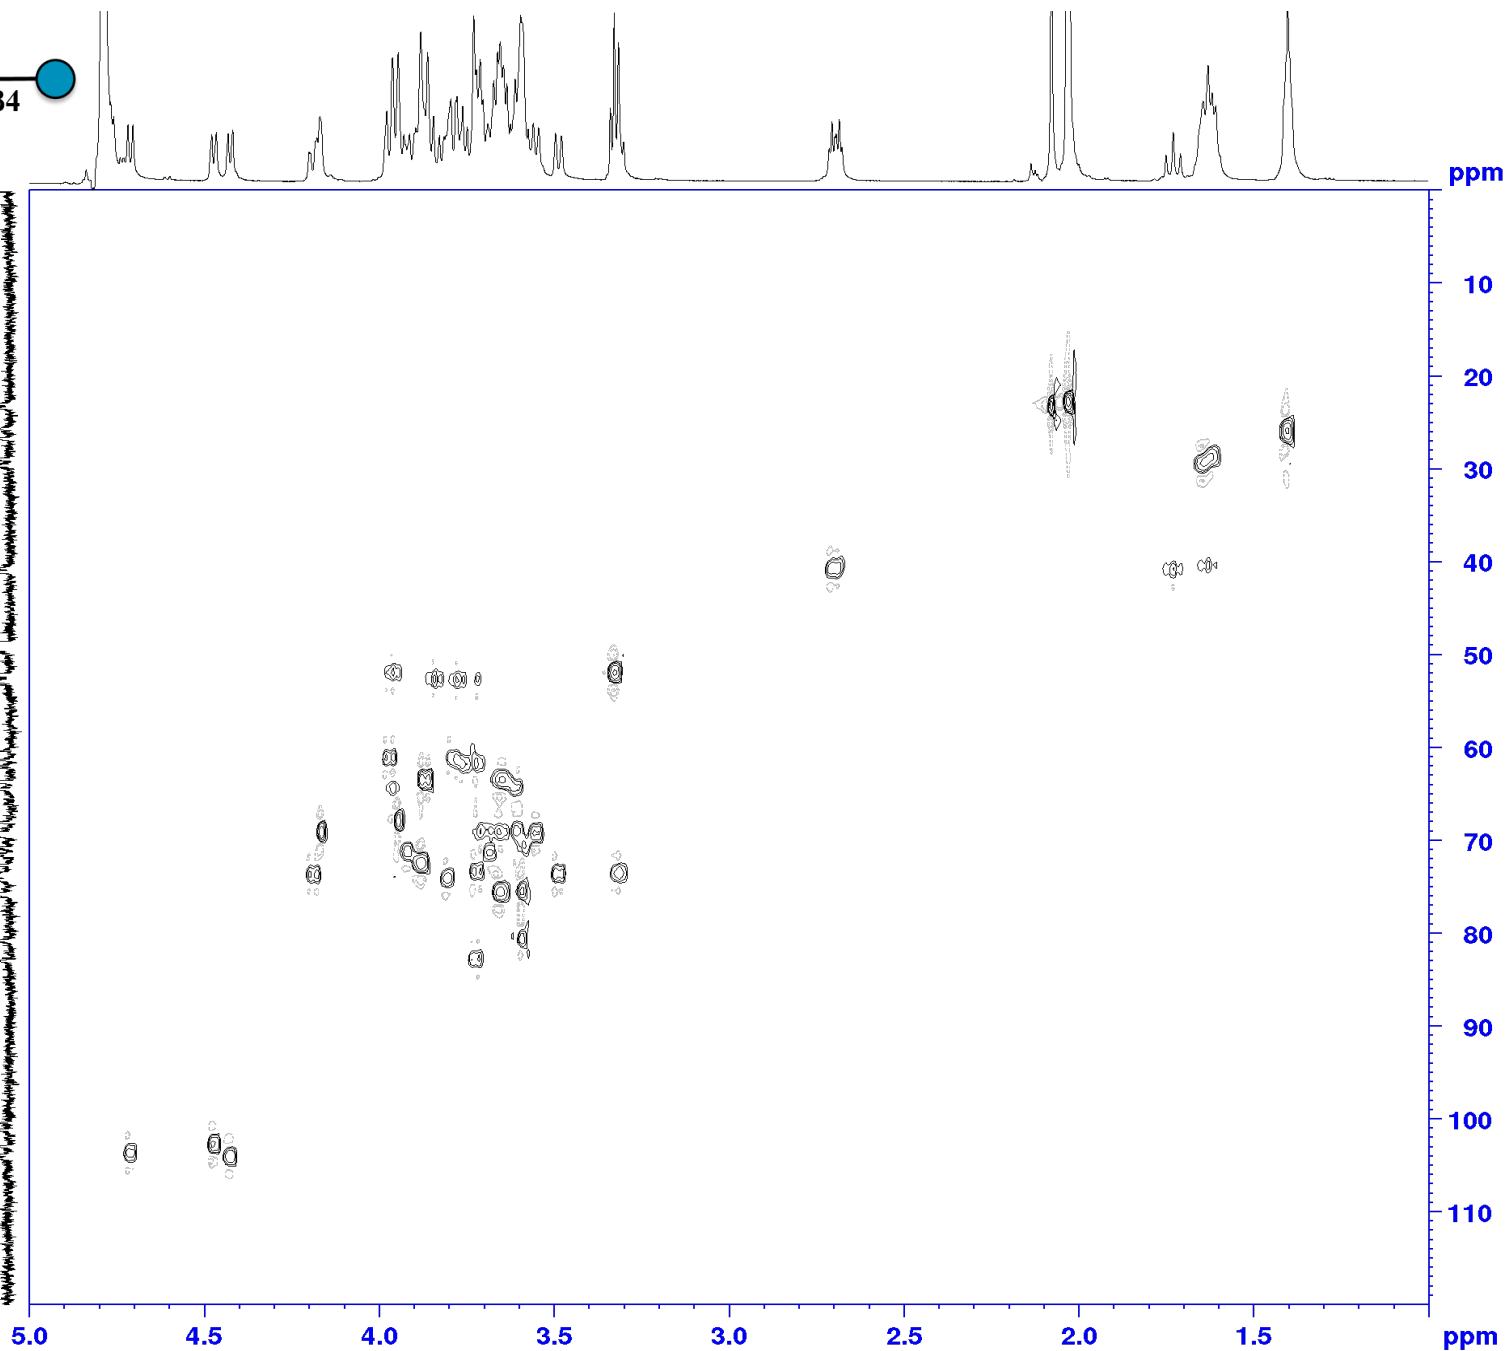

$^1\text{H}$ - $^{13}\text{C}$  HSQC NMR spectrum of Compound **8** (600 MHz/150 MHz D<sub>2</sub>O)

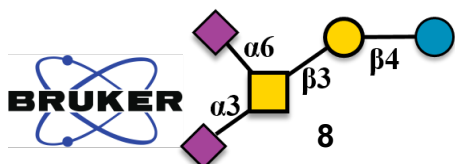

THK-6A3A-GAA-7

```

Current Data Parameters
NAME THK-GA7-1A-150604
EXPNO 13
PROCNO 1

F2 - Acquisition Parameters
Date_ 20180605
Time 7.50
INSTRUM spect
PROBHD 5 mm QNP 1H/1
PULPROG hmbcgp1pndgf
TD 2048
SOLVENT D2O
NS 16
DS 0
SWH 6009.615 Hz
FIDRES 2.934382 Hz
AQ 0.1703936 sec
RG 32768
DM 83.200 usec
DE 6.00 usec
TE 298.9 K
CNS12 145.0000000
CNS13 12.0000000
d0 0.00000300 sec
D1 1.50000000 sec
d2 0.00344828 sec
d6 0.04166667 sec
D16 0.00050000 sec
IN0 0.00001661 sec
MCREST 0 sec
MCMRK 1.50000000 sec

===== CHANNEL f1 =====
NUC1 1H
P1 10.50 usec
P2 21.00 usec
PL1 -3.00 dB
SFO1 598.3028186 MHz

===== CHANNEL f2 =====
NUC2 13C
P3 10.00 usec
PL2 0 dB
SFO2 150.4561948 MHz

===== GRADIENT CHANNEL =====
GPNM[1] SINE.100
GPNM[2] SINE.100
GPNM[3] SINE.100
GPX1 0 %
GPX2 0 %
GPX3 0 %
GPY1 0 %
GPY2 0 %
GPY3 0 %
GPZ1 50.00 %
GPZ2 30.00 %
GPZ3 40.10 %
P16 1000.00 usec

F1 - Acquisition parameters
TD 282
SFO1 150.4562 MHz
FIDRES 213.459702 Hz
SW 200.044 ppm
FMODE QF

F2 - Processing parameters
SI 4096
SF 598.2999340 MHz
WDW QSLINE
SSB 2
LB 0 Hz
GB 0
PC 1.00

F1 - Processing parameters
SI 512
MC2 QF
SF 150.4425046 MHz
WDW SINE
SSB 0
LB 0 Hz
GB 0
  
```

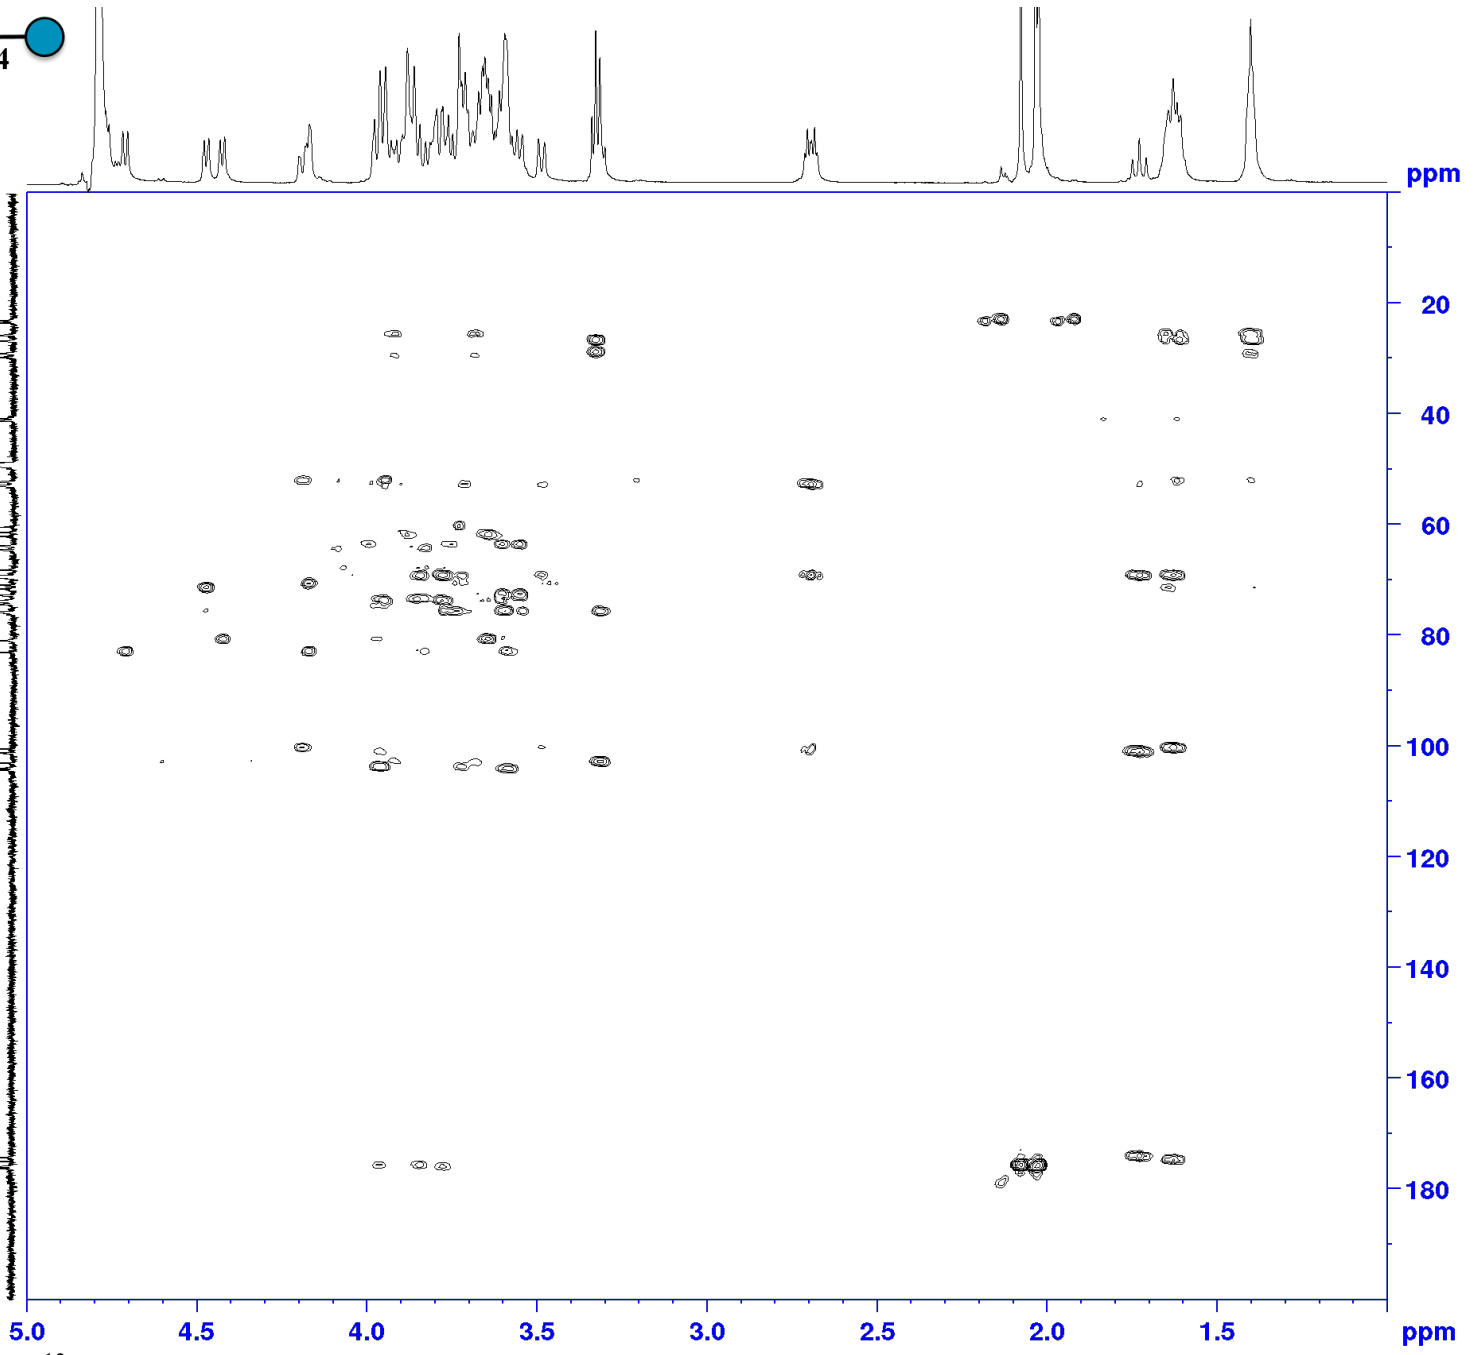

$^1\text{H}$ - $^{13}\text{C}$  HMBC NMR spectrum of Compound **8** (600 MHz/150 MHz  $\text{D}_2\text{O}$ )

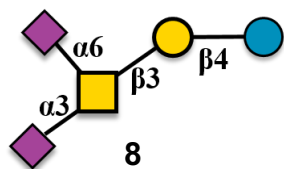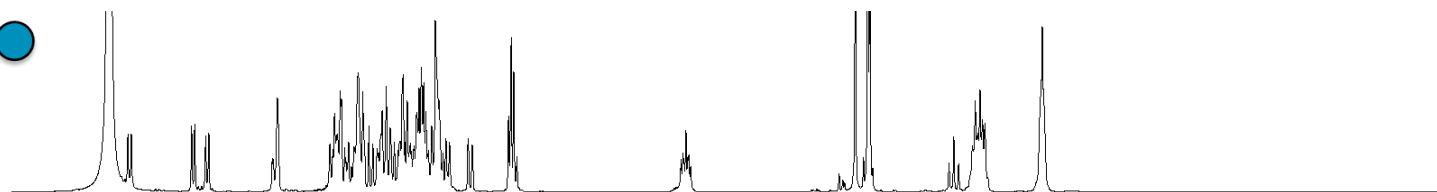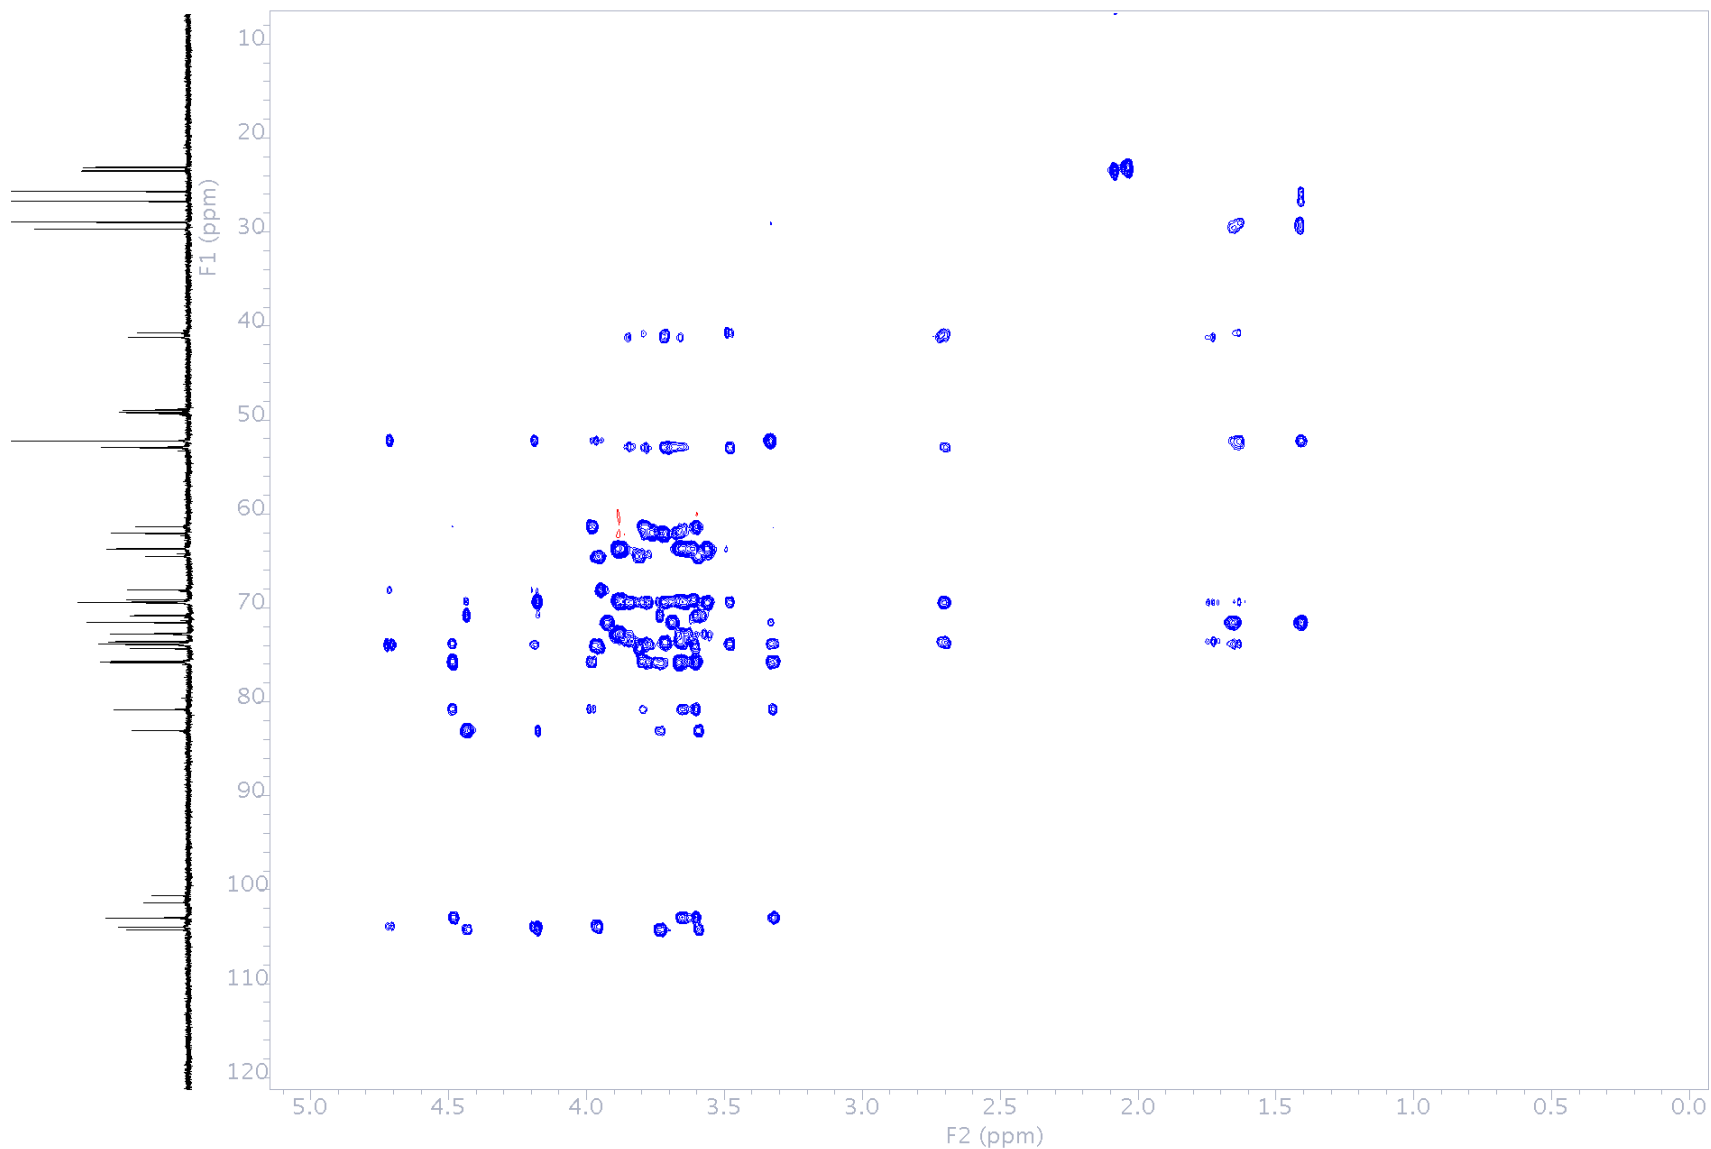

$^1\text{H}$ - $^{13}\text{C}$  HSQC-TOCSY NMR spectrum of Compound **8** (700 MHz/175 MHz  $\text{D}_2\text{O}$ )

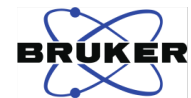

THK-6'A3A-GAA7

Current Data Parameters  
NAME THK-278-f  
EXPNO 1  
PROCNO 1

F2 - Acquisition Parameters  
Date\_ 20200417  
Time 12.15  
INSTRUM spect  
PROBHD 5 mm QNP 1H/1  
PULPROG zg  
TD 32768  
SOLVENT H2O+D2O  
NS 128  
DS 0  
SWH 8389.262 Hz  
FIDRES 0.256020 Hz  
AQ 1.9529728 sec  
RG 256  
DW 59.600 usec  
DE 6.50 usec  
TE 299.1 K  
D1 2.00000000 sec  
MCREST 0 sec  
MCWRK 0.01500000 sec

===== CHANNEL f1 =====  
NUC1 1H  
P1 10.00 usec  
PL1 -3.00 dB  
SFO1 598.1028167 MHz

F2 - Processing parameters  
SI 32768  
SF 598.0999521 MHz  
WDW no  
SSB 0  
LB 0 Hz  
GB 0  
PC 2.00

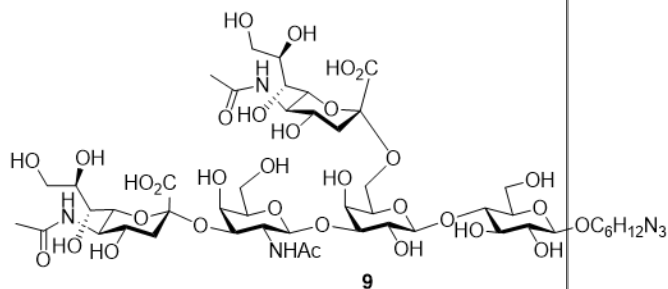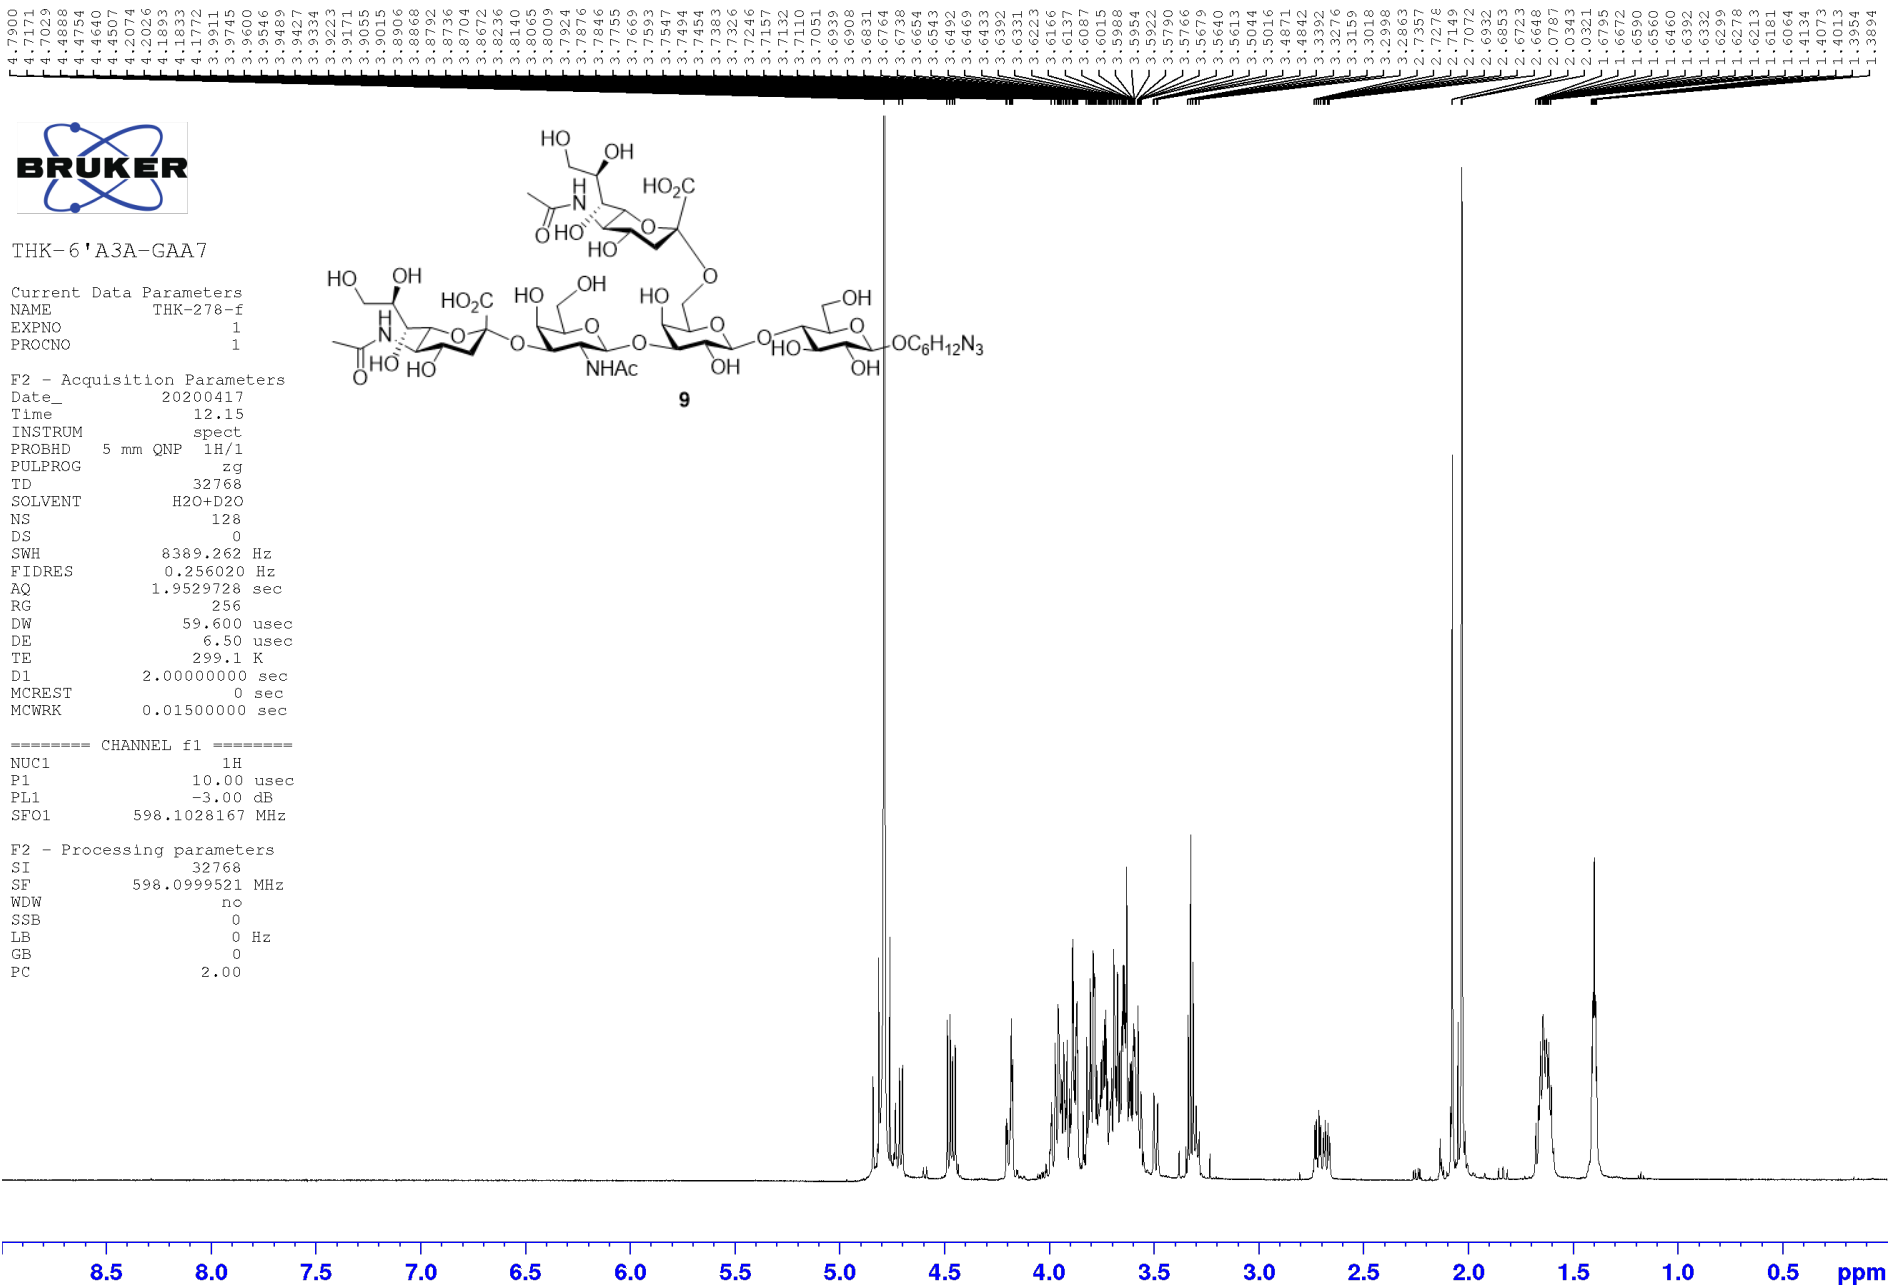

<sup>1</sup>H NMR spectrum of Compound 9 (600 MHz D<sub>2</sub>O)

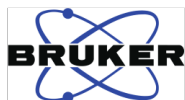

THK-6'A3A-GAA7

Current Data Parameters  
NAME THK-278-f  
EXPNO 2  
PROCNO 1

F2 - Acquisition Parameters  
Date\_ 20200413  
Time 2.38  
INSTRUM spect  
PROBHD 5 mm QNP 1H/1  
PULPROG zgpgg  
TD 32768  
SOLVENT D2O  
NS 9765  
DS 0  
SWH 45045.047 Hz  
FIDRES 1.374666 Hz  
AQ 0.3637248 sec  
RG 4096  
DW 11.100 usec  
DE 6.50 usec  
TE 294.6 K  
DL 3.50000000 sec  
dL1 0.03000000 sec  
DELTA 3.40000010 sec  
MCREST 0 sec  
MCHRK 0.01500000 sec

----- CHANNEL f1 -----  
NUC1 13c  
P1 4.80 usec  
PL1 0 dB  
SFO1 150.4092089 MHz

----- CHANNEL f2 -----  
CPDPRG[2] waltz16  
NUC2 1H  
PCPD2 92.00 usec  
PL2 120.00 dB  
PL12 6.00 dB  
PL13 15.00 dB  
SFO2 598.1029905 MHz

F2 - Processing parameters  
SI 45536  
SF 150.3922109 MHz  
WDW EM  
SSB 0  
LB 3.00 Hz  
GB 0  
PC 1.00

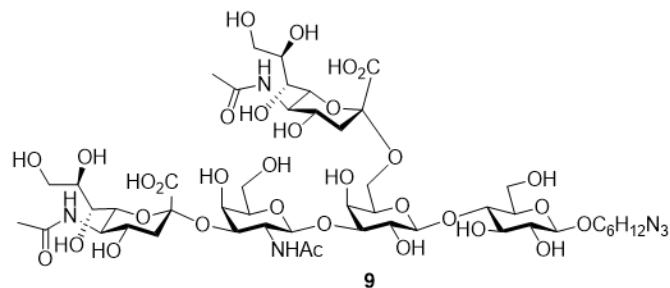

176.115  
175.947  
175.883  
174.753  
174.201

103.857  
103.646  
102.977  
101.176  
100.592

83.113  
79.449  
75.962  
75.737  
75.441  
73.970  
73.772  
73.734  
73.561  
72.544  
71.500  
70.900  
69.319  
69.233  
68.218  
68.199  
68.070  
64.376  
63.625  
63.600  
62.179  
61.065  
52.805  
52.782  
52.098  
52.042  
49.431  
49.285  
49.142  
48.998  
48.854  
48.710  
48.564  
41.013  
40.367  
39.550  
28.852  
26.629  
25.573  
23.355  
22.988  
22.962

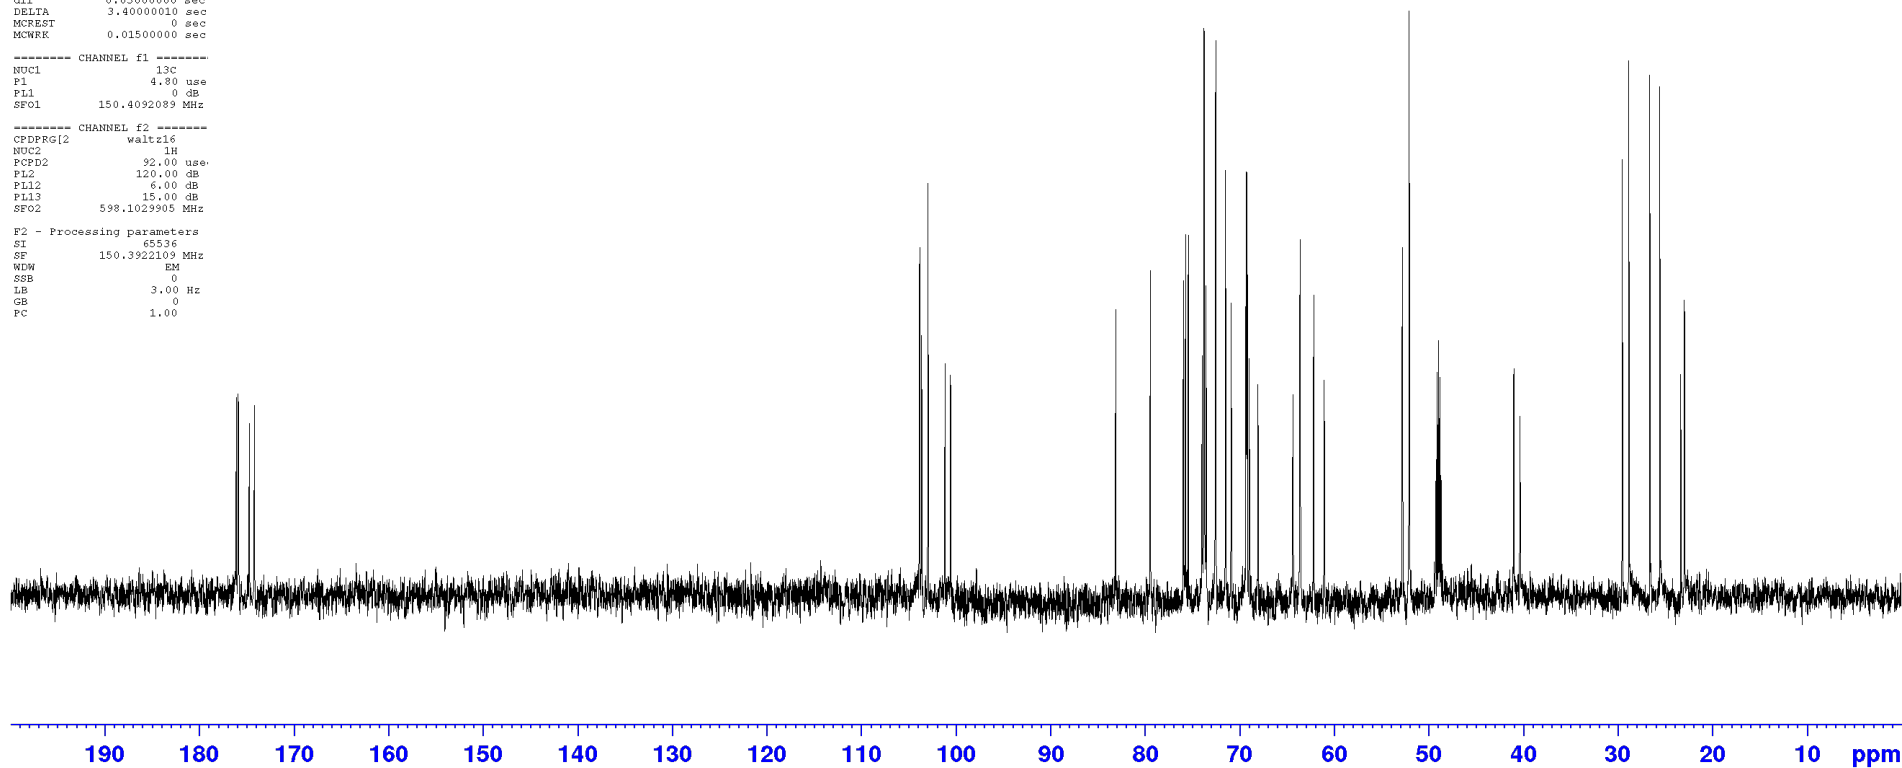

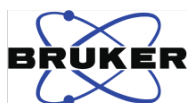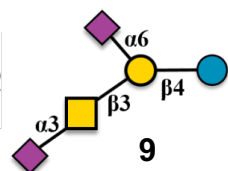

THK-6 'A3A-GAA7

Current Data Parameters  
NAME THK-278-f  
EXPNO 11  
PROCNO 1

F2 - Acquisition Parameters  
Date\_ 20200412  
Time 12.57  
INSTRUM spect  
PROBHD 5 mm QNP 1H/1  
PULPROG cosygqf  
TD 2048  
SOLVENT D2O  
NS 18  
DS 0  
SWH 6009.615 Hz  
FIDRES 2.934382 Hz  
AQ 0.1703936 sec  
RG 128  
DW 83.200 usec  
DE 6.50 usec  
TE 294.8 K  
d0 0.00000300 sec  
D1 1.50000000 sec  
IN0 0.00016640 sec  
MCREST 0 sec  
MCWRR 1.50000000 sec

----- CHANNEL f1 -----  
NUC1 1H  
P0 14.00 usec  
P1 12.80 usec  
PL1 -3.00 dB  
SFO1 598.1028162 MHz

F1 - Acquisition parameters  
TD 400  
SFO1 598.1028 MHz  
FIDRES 30.048077 Hz  
SW 10.048 ppm  
FnMODE QF

F2 - Processing parameters  
SI 2048  
SF 598.0999344 MHz  
WDW QSINE  
SSB 0  
LB 0 Hz  
GB 0  
PC 1.00

F1 - Processing parameters  
SI 512  
MC2 QF  
SF 598.0999348 MHz  
WDW QSINE  
SSB 0  
LB 0 Hz  
GB 0

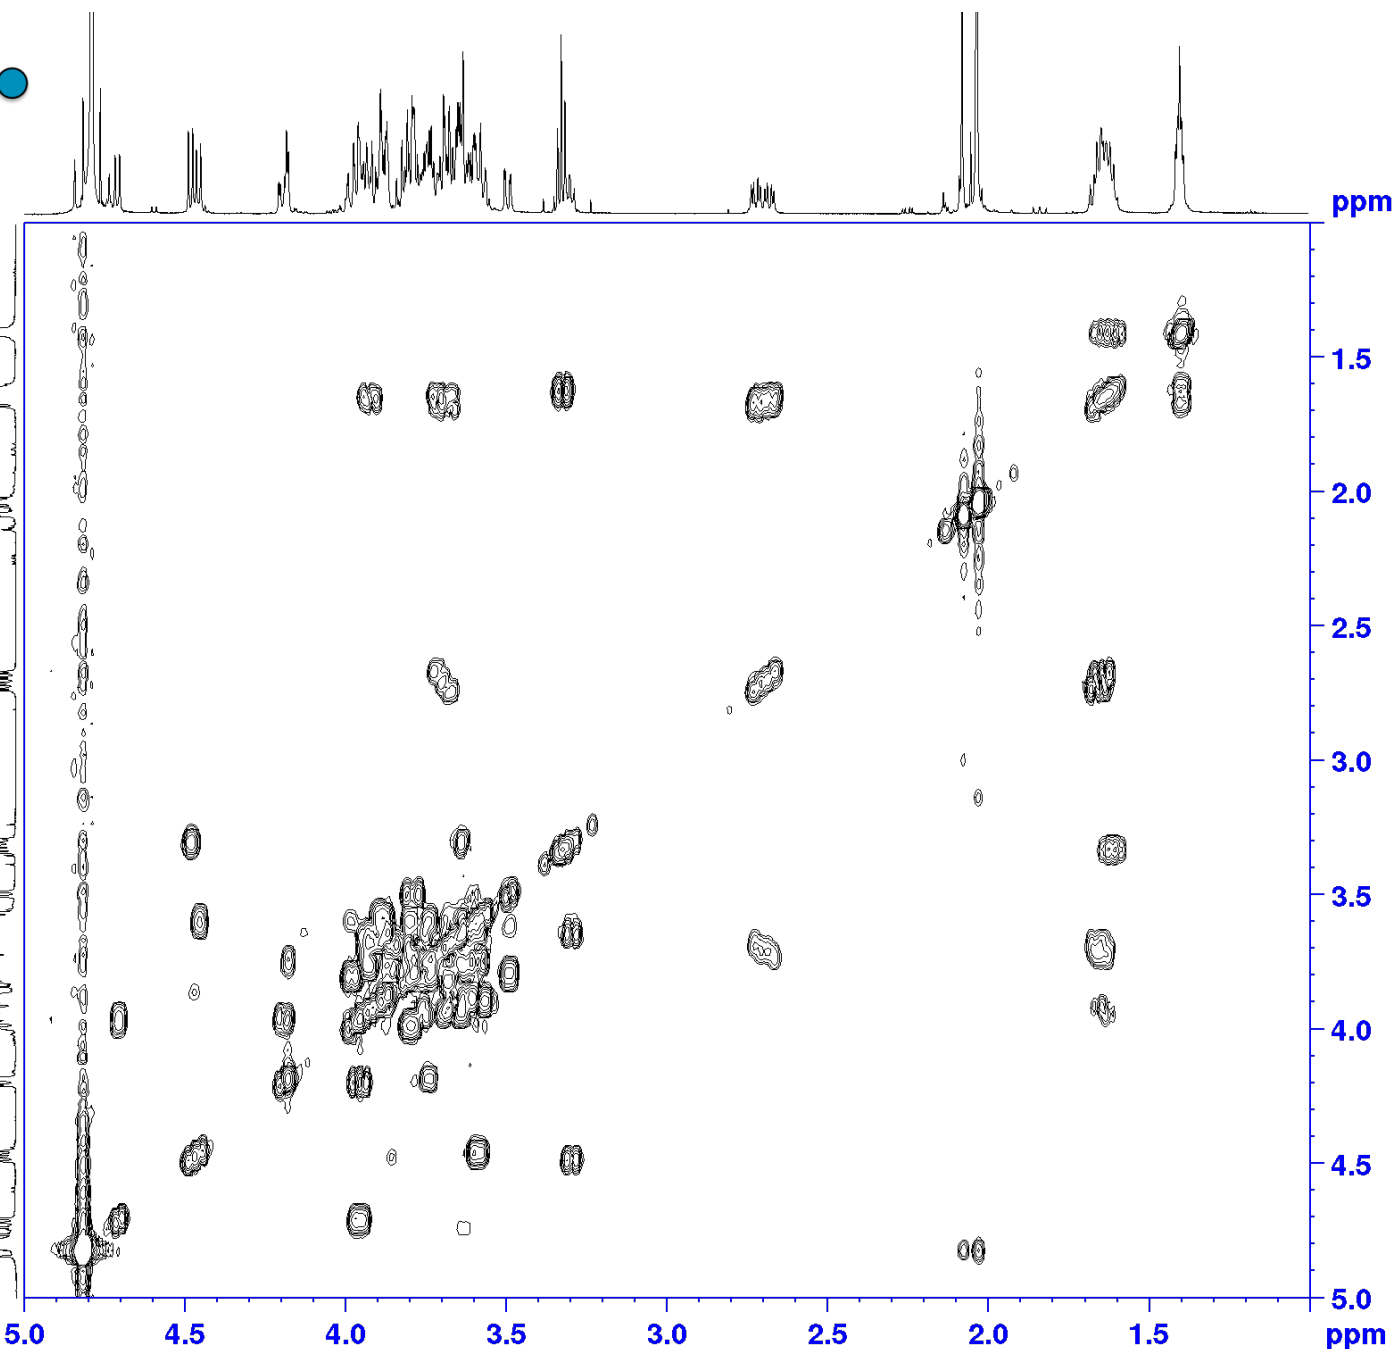

$^1\text{H}$ - $^1\text{H}$  COSY NMR spectrum of Compound 9 (600 MHz  $\text{D}_2\text{O}$ )



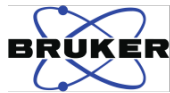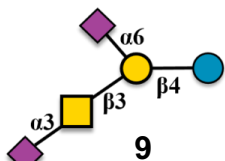

9

THK-6 'A3A-GAA

Current Data Parameters  
NAME THK-278-f  
EXPNO 102  
PROCNO 1  
  
F2 - Acquisition Parameters  
Date\_ 20200415  
Time 3.50  
INSTRUM spect  
PROBHD 5 mm QNP 1H/1  
PULPROG haqcetgpa1  
TD 2048  
SOLVENT acetone  
NS 16  
DS 8  
SWH 6009.615 Hz  
FIDRES 2.934382 Hz  
AQ 0.1703936 sec  
RG 32768  
DW 83.200 usec  
DE 6.50 usec  
TE 295.9 K  
CNS12 145.000000  
dc 0.0000000 sec  
D1 1.20000005 sec  
d4 0.00172414 sec  
d11 0.03000000 sec  
d13 0.00000400 sec  
D16 0.00050000 sec  
D24 0.00089000 sec  
DELTA 0.00158200 sec  
DELTA1 0.00150800 sec  
INO 0.00001511 sec  
MCPRST 0 sec  
MCPK 0.20000041 sec  
SICNT 0

==== CHANNEL f1 =====  
NUC1 1H  
P1 13.00 usec  
P2 26.00 usec  
P28 1000.00 usec  
PL1 -3.00 dB  
SFO1 598.1028152 MHz

==== CHANNEL f2 =====  
CPDPRG2 garp  
NUC2 13C  
P3 10.00 usec  
p4 20.00 usec  
PCPD2 70.00 usec  
PL2 0 dB  
PL12 20.00 dB  
SFO2 150.4037948 MHz

==== GRADIENT CHANNEL =====  
GPNM[1] SINE.100  
GPNM[2] SINE.100  
GPK1 0 %  
GPK2 0 %  
GPX1 0 %  
GPX2 0 %  
GPE1 80.00 %  
GPE2 20.10 %  
P16 1000.00 usec

F1 - Acquisition parameters  
TD 239  
SFO1 150.4038 MHz  
FIDRES 276.863556 Hz  
SW 219.976 ppm  
EnMODE Echo-Antiecho

F2 - Processing parameters  
SI 2048  
SF 598.0999706 MHz  
WDW QSINE  
SSB 4  
LB 0 Hz  
GB 0  
FC 1.00

F1 - Processing parameters  
SI 512  
MC2 echo-antiecho  
SF 150.3922135 MHz  
WDW QSINE  
SSB 4  
LB 0 Hz  
GB 0

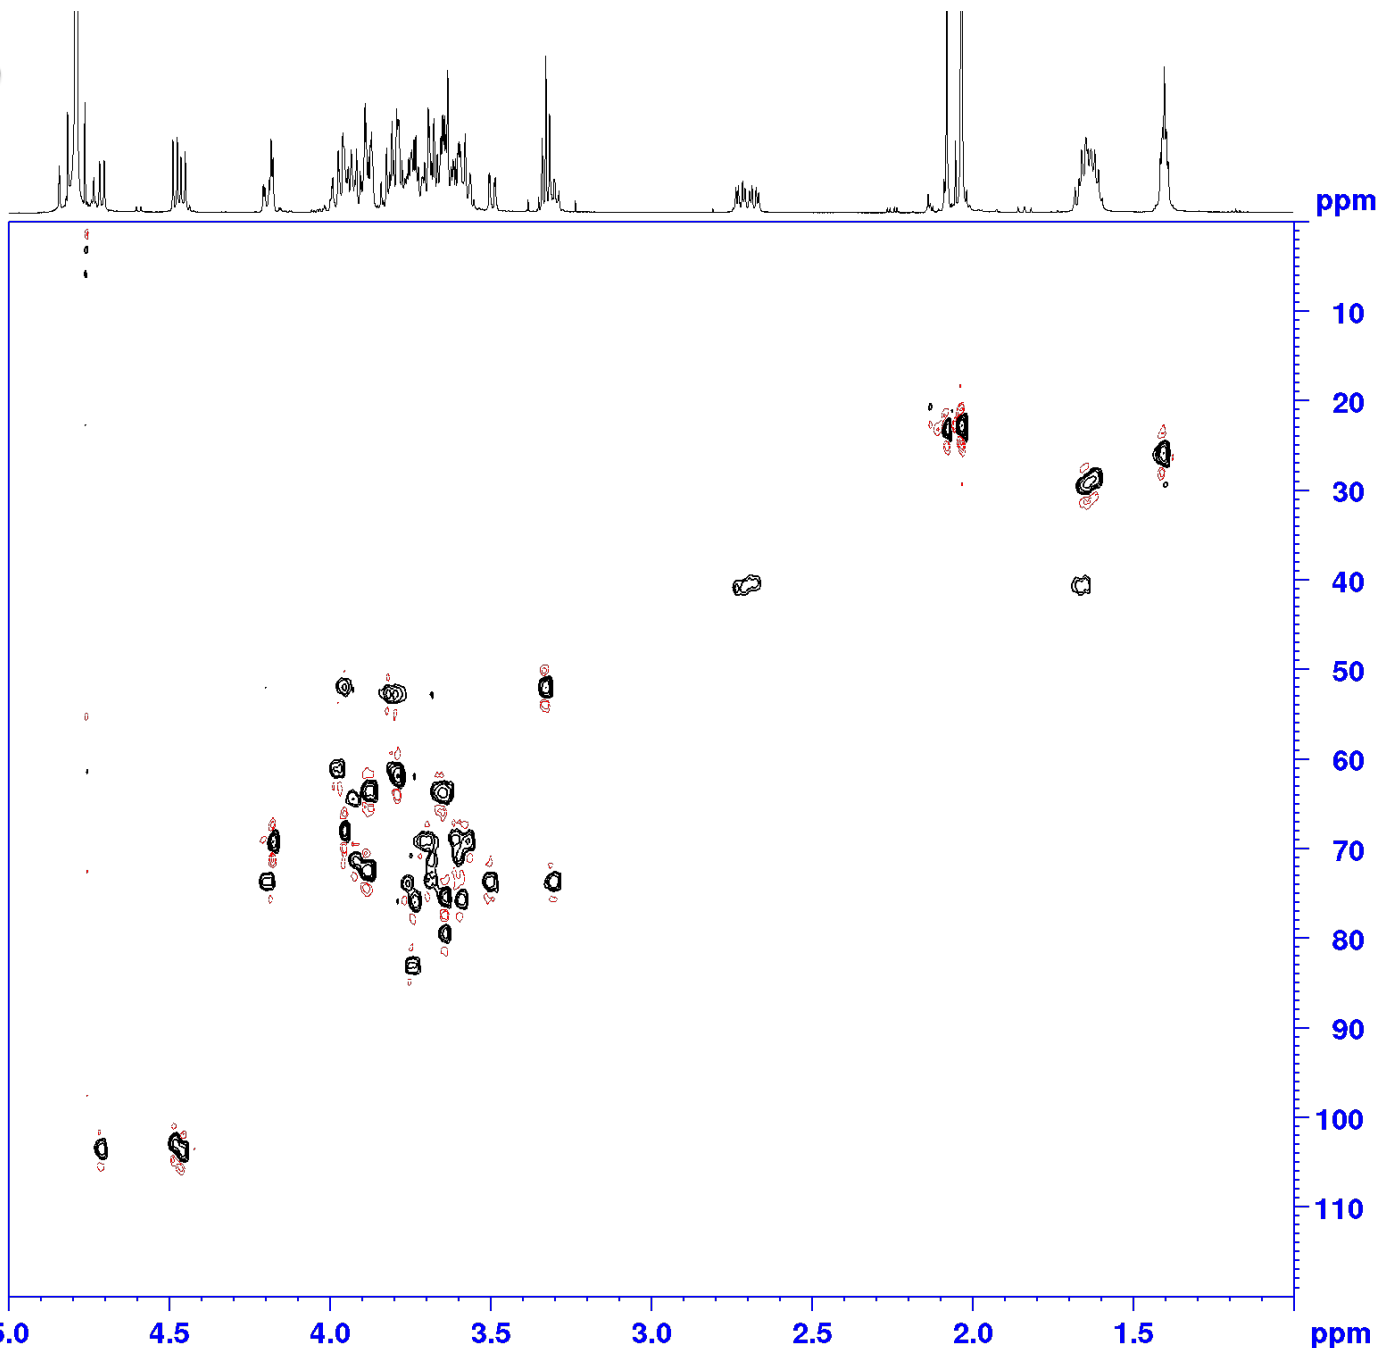

$^1\text{H}$ - $^{13}\text{C}$  HSQC NMR spectrum of Compound 9 (600 MHz/150 MHz  $\text{D}_2\text{O}$ )

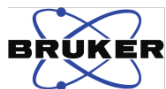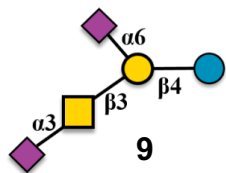

THK-6'A3A-GAA7

Current Data Parameters  
NAME THK-278-f  
EXNO 13  
PROCNO 1

F2 - Acquisition Parameters  
Date\_ 20200415  
Time 13.03  
INSTRUM spect  
PROBHD 5 mm QNP 1H/1  
PULPROG hmbcgp1pdqf  
TD 2048  
SOLVENT Acetone  
NS 96  
DS 0  
SWH 6009.615 Hz  
FIDRES 2.934382 Hz  
AQ 0.1703936 sec  
RG 32768  
DW 83.200 usec  
DE 6.00 usec  
TE 295.7 K  
CNST2 145.000000  
CNST13 2.0000000  
d0 0.00000300 sec  
d1 1.20000005 sec  
d2 0.00344828 sec  
d4 0.06250000 sec  
d16 0.00050000 sec  
TNO 0.00001662 sec  
MCREST 0 sec  
MCWRK 1.20000005 sec

==== CHANNEL f1 =====  
NUC1 1H  
P1 12.90 usec  
p2 25.80 usec  
FL1 -3.00 dB  
SFO1 598.1028152 MHz

==== CHANNEL f2 =====  
NUC2 13C  
P3 10.50 usec  
FL2 0 dB  
SFO2 150.4042733 MHz

===== GRADIENT CHANNEL =====  
GPNAM[1] SINE.100  
GPNAM[2] SINE.100  
GPNAM[3] SINE.100  
GFX1 0 %  
GFX2 0 %  
GFX3 0 %  
GPY1 0 %  
GPY2 0 %  
GPY3 0 %  
GZF1 50.00 %  
GZF2 30.00 %  
GZF3 40.10 %  
F16 1000.00 usec

F1 - Acquisition parameters  
TD 367  
SFO1 150.4043 MHz  
FIDRES 163.897476 Hz  
SW 199.962 ppm  
FnMODE QF

F2 - Processing parameters  
SI 4096  
SF 598.0999308 MHz  
WDW QSINE  
SSB 2  
LB 0 Hz  
GB 0  
PC 1.00

F1 - Processing parameters  
SI 512  
MC2 QF  
SF 150.3922043 MHz  
WDW SINE  
SSB 0  
LB 0 Hz  
GB 0

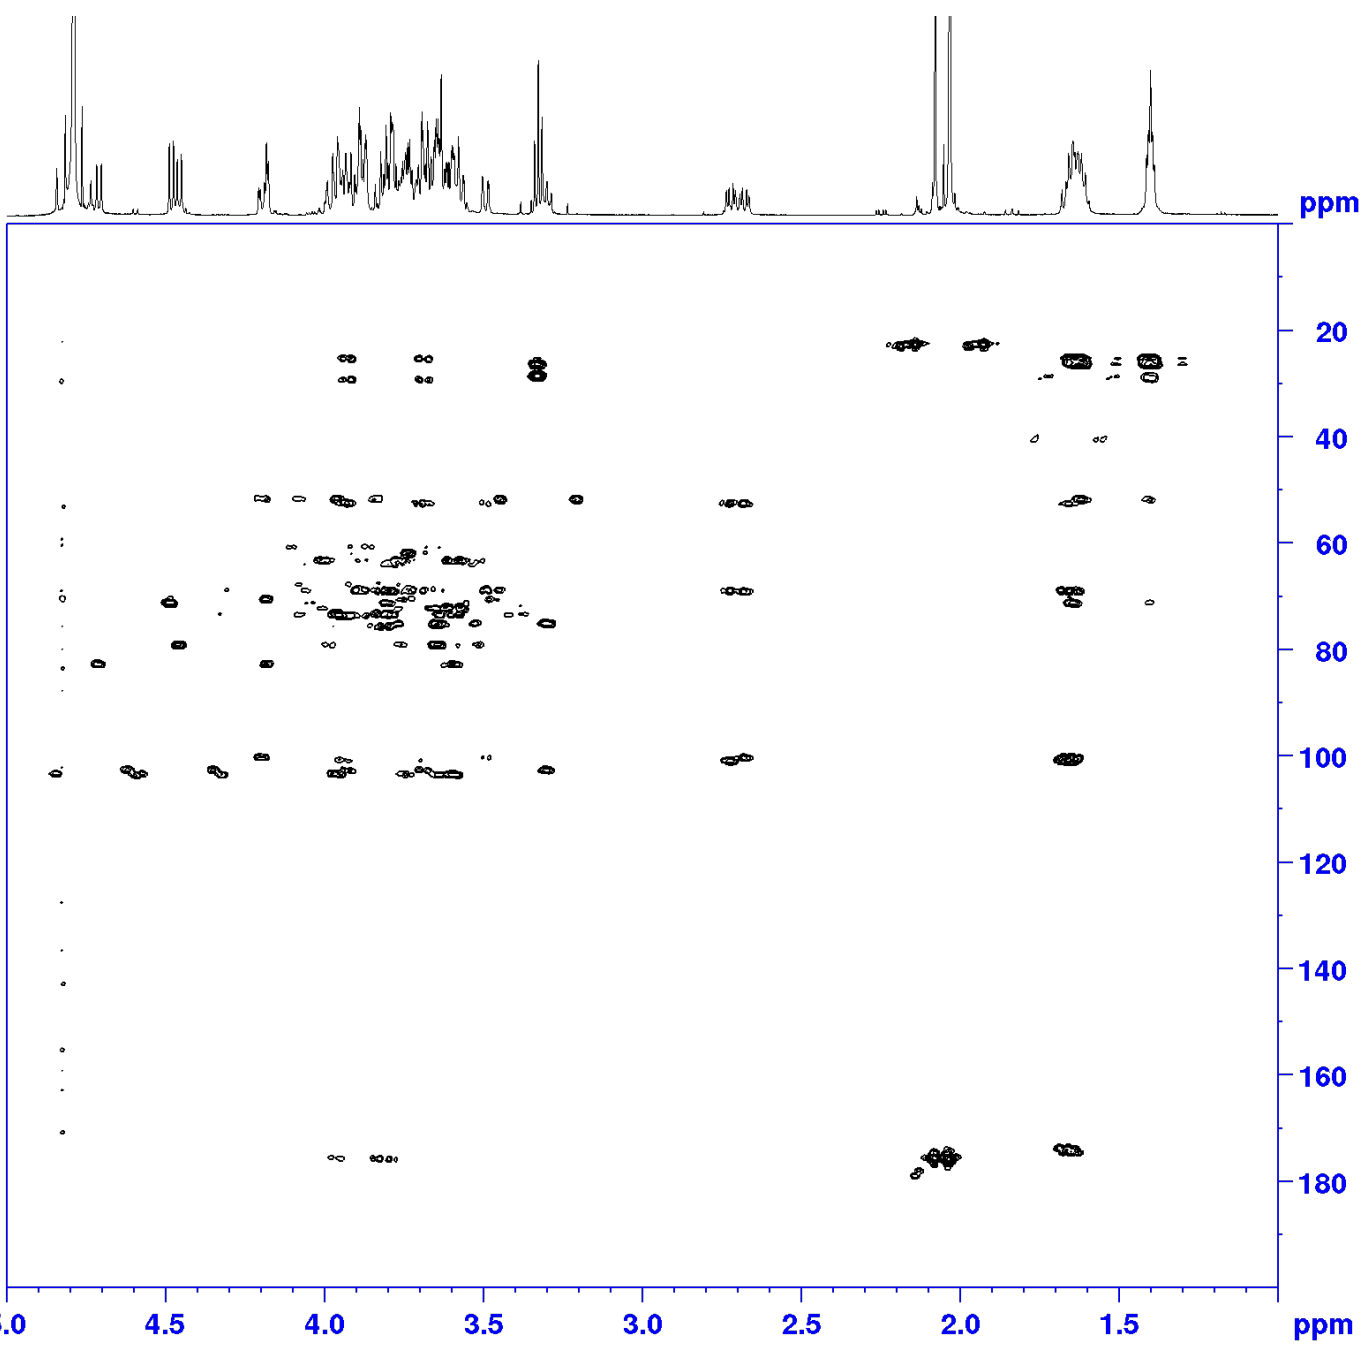

$^1\text{H}$ - $^{13}\text{C}$  HMBC NMR spectrum of Compound 9 (600 MHz/150 MHz D<sub>2</sub>O)

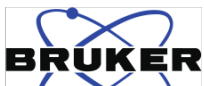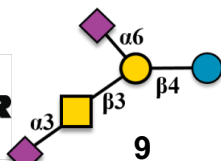

THK-6 'A3A-GAA7

```
Current Data Parameters
NAME      THK-278-f
EXPNO    14
PROCNO   1

F2 - Acquisition Parameters
Date_    20200416
Time     12.46
INSTRUM  spect
PROBHD   5 mm QNP 1H/1
PULPROG  zgpg30
TD       2048
SOLVENT  CDCl3
NS       96
DS       8
SWH      6009.615 Hz
FIDRES   2.934382 Hz
AQ       0.1703936 sec
RG       32768
DW       83.200 usec
DE       6.50 usec
TE       297.1 K
CONST2   145.000000
d0       0.00000300 sec
D1       1.20000005 sec
d4       0.00172414 sec
D9       0.07500000 sec
d11      0.03000000 sec
d13      0.00000400 sec
D16      0.00100000 sec
DELTA    0.00200000 sec
DELTA1   0.00003160 sec
PRGTOP1  8
INO      0.00001511 sec
J1       48
MQUEST   0 sec
MCHRFK   0.60000002 sec
SCALEF   6

===== CHANNEL f1 =====
NUC1     1H
P1       12.60 usec
p2       25.60 usec
p3       16.67 usec
P6       25.00 usec
p7       50.00 usec
E17      1000.00 usec
P28      1000.00 usec
FL1      -3.00 dB
FL10     4.00 dB
SFO1     598.1026152 MHz

===== CHANNEL f2 =====
CPDPRG2  gspg
NUC2     13C
P3       10.00 usec
p4       20.00 usec
PCPD2    70.00 usec
FL2      0 dB
FL12     20.00 dB
SFO2     150.4059003 MHz

===== GRADIENT CHANNEL =====
GPMAM[1] SINE.100
GPMAM[2] SINE.100
GPMAM[3] SINE.100
GPX1     0 %
GPX2     0 %
GPX3     0 %
GPY1     0 %
GPY2     0 %
GPY3     0 %
GZ1      80.00 %
GZ2      30.00 %
GZ3      20.10 %
F16      1000.00 usec

F1 - Acquisition parameters
ID       394
SFO1     150.4059 MHz
FIDRES   167.945145 Hz
SW       167.973 ppm
P2MODE   TPFI

F2 - Processing parameters
SI       2048
SF       598.0929936 MHz
WDW      QSI
SSB      3
LB       0 Hz
GB       0
PC       1.00

F1 - Processing parameters
SI       512
MC2      TPFI
SF       150.3924224 MHz
WDW      QSI
SSB      2
LB       0 Hz
GB       0
```

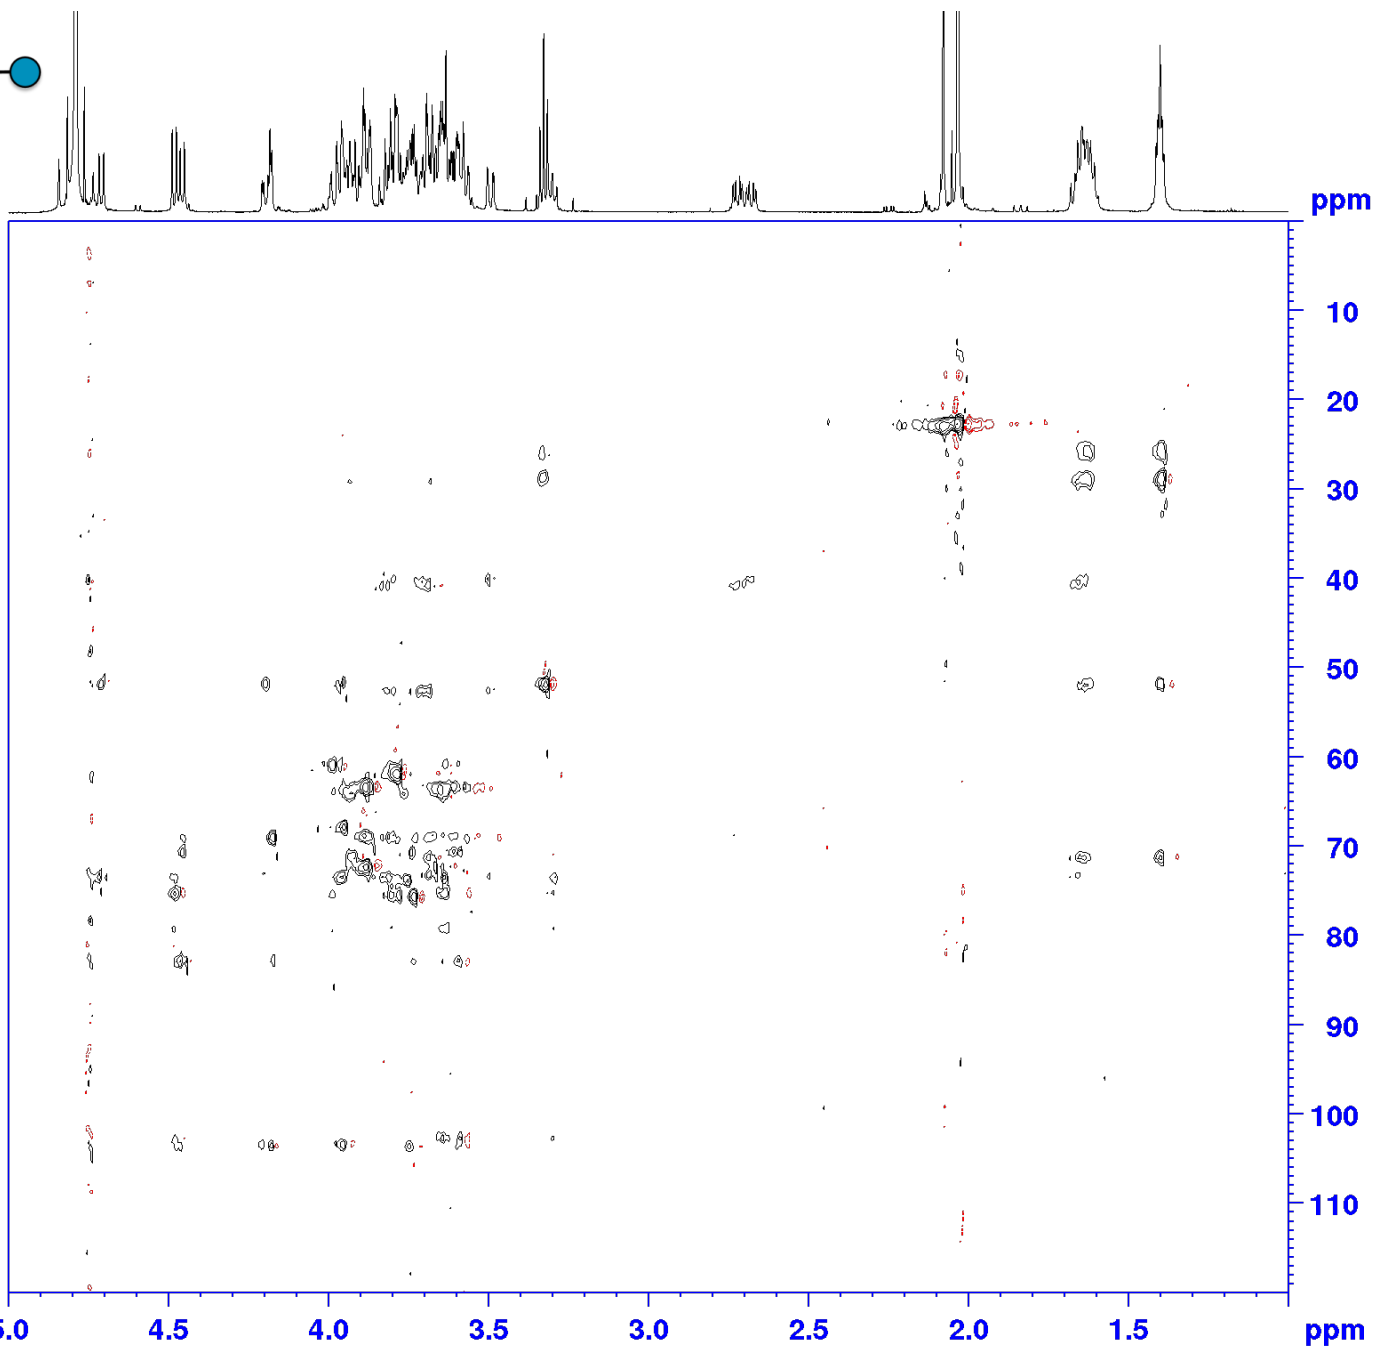

$^1\text{H}$ - $^{13}\text{C}$  HSQC-TOCSY NMR spectrum of Compound 9 (600 MHz/150 MHz  $\text{D}_2\text{O}$ )

THK-6A6A'3A-GAA7

Current Data Parameters  
NAME THK-263-20200202.fid  
EXPNO 1  
PROCNO 1

F2 - Processing parameters  
SI 16384  
SF 499.7888646 MHz  
WDW EM  
SSB 0  
LB 0.30 Hz  
GB 0  
PC 1.00

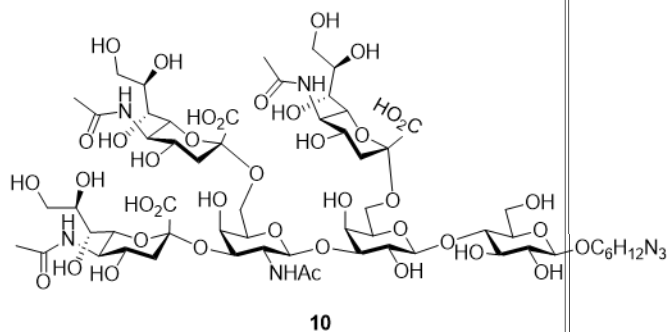

4.7897  
4.7169  
4.6999  
4.4786  
4.4625  
4.4208  
4.4051  
4.1742  
4.1718  
4.1523  
4.1496  
4.1244  
4.1219  
3.9983  
3.9773  
3.9464  
3.9357  
3.8234  
3.8115  
3.8099  
3.8799  
3.8702  
3.8596  
3.8489  
3.8256  
3.8194  
3.7981  
3.7901  
3.7790  
3.7689  
3.7590  
3.7393  
3.7236  
3.7004  
3.6836  
3.6640  
3.6550  
3.6424  
3.6300  
3.6147  
3.5933  
3.5845  
3.5698  
3.5575  
3.5365  
3.5161  
3.4680  
3.4474  
3.3248  
3.3097  
3.2950  
3.2718  
2.7139  
2.6993  
2.6914  
2.6727  
2.6650  
2.6407  
2.6382  
2.0586  
2.0146  
2.0135  
1.7600  
1.7356  
1.7114  
1.6748  
1.6452  
1.6199  
1.6003  
1.5890  
1.5751  
1.4011  
1.3940  
1.3842  
1.3752  
1.3676

8.5 8.0 7.5 7.0 6.5 6.0 5.5 5.0 4.5 4.0 3.5 3.0 2.5 2.0 1.5 1.0 0.5 ppm

1.04  
1.09  
1.07  
1.08  
1.18  
4.15  
8.09  
7.40  
15.95  
2.12  
1.09  
3.18  
3.00  
11.50  
1.17  
6.06  
4.08

<sup>1</sup>H NMR spectrum of Compound 10 (500 MHz D<sub>2</sub>O)

176.086  
175.944  
175.840  
175.786  
174.971  
174.447  
174.399

104.147  
103.491  
102.835  
101.438  
101.235  
100.726  
82.502  
80.949  
75.761  
75.578  
74.484  
73.945  
73.747  
73.670  
73.606  
73.439  
72.626  
72.583  
71.447  
70.906  
69.447  
69.412  
69.295  
69.264  
69.152  
69.037  
68.031  
64.914  
64.198  
63.645  
63.571  
61.310  
52.974  
52.789  
52.741  
52.104  
52.066  
49.518  
49.345  
49.173  
49.000  
48.827  
48.654  
48.482  
41.237  
41.044  
40.440  
29.557  
28.856  
26.640  
25.586  
23.376  
23.026  
23.011  
22.958

THK-6A6A'3A-GAA7

Current Data Parameters  
NAME THK-263-20200202-13c.fid  
EXPNO 1  
PROCNO 1

F2 - Processing parameters  
SI 65536  
SF 125.6718930 MHz  
WDW EM  
SSB 0  
LB 0.30 Hz  
GB 0  
PC 1.00

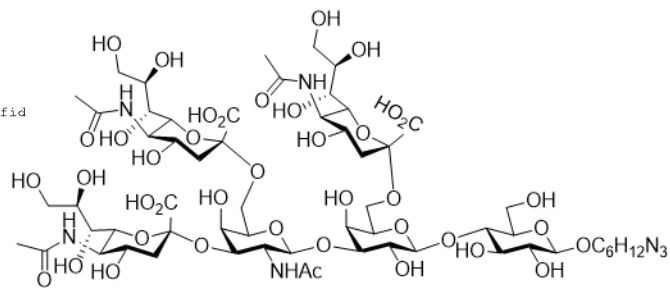

10

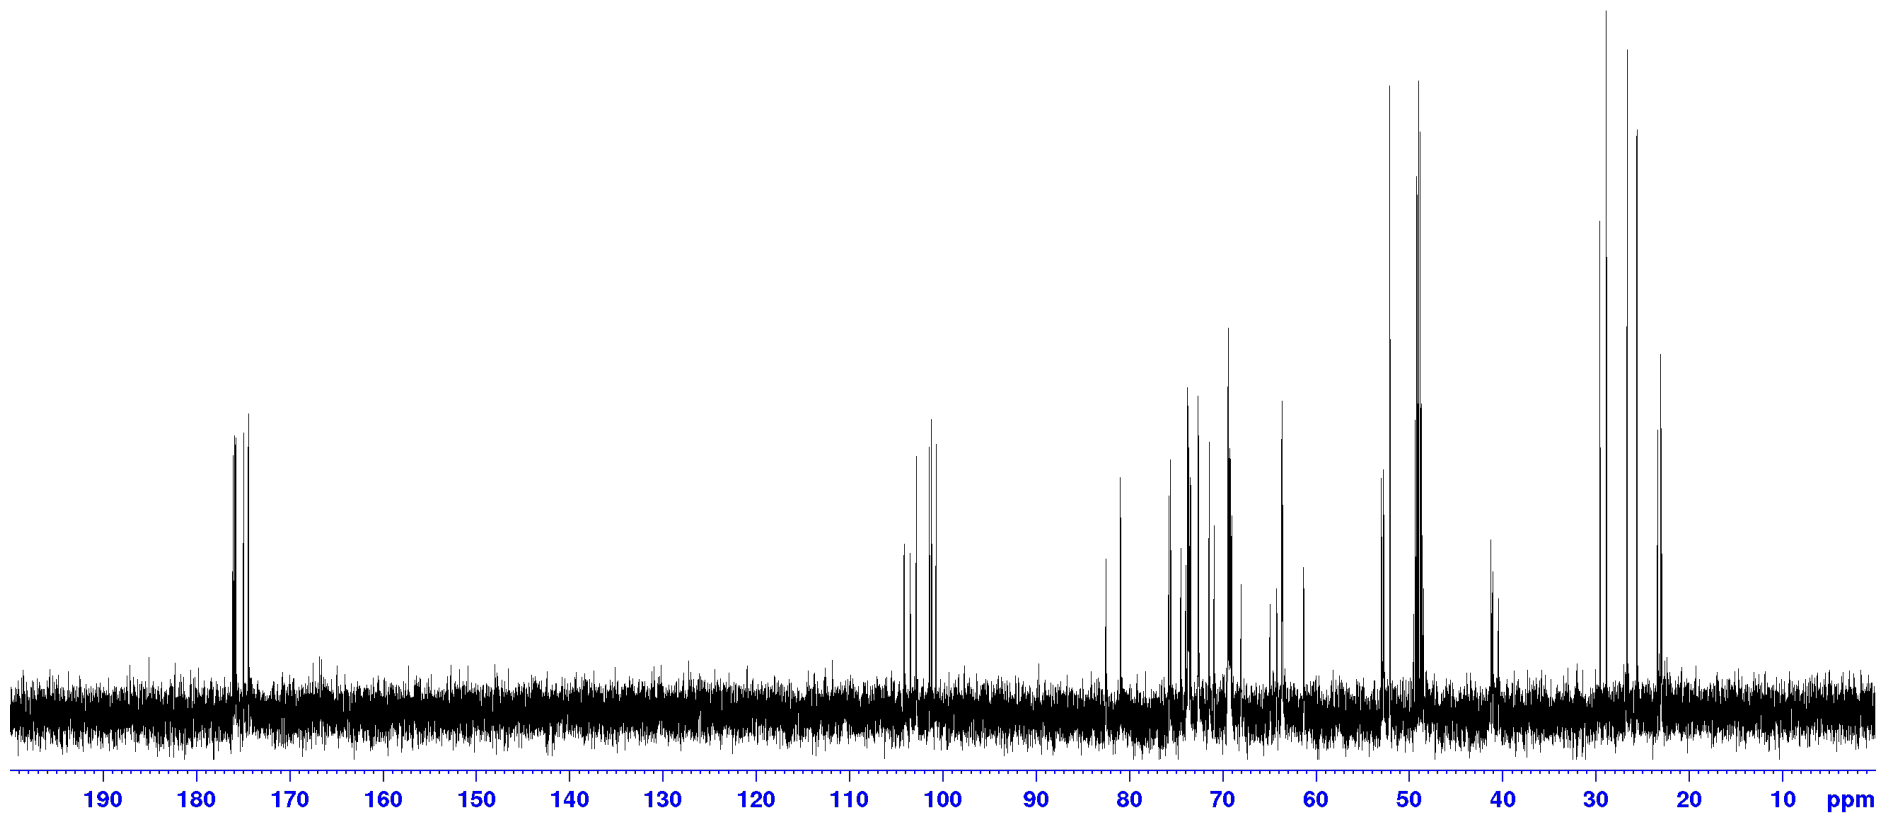

<sup>13</sup>C NMR spectrum of Compound 10 (125 MHz D<sub>2</sub>O)

THK-0-TFA-GAA7

Current Data Parameters

NAME THK-264-TFA-20200204-1H.fid  
EXPNO 1  
PROCNO 1

F2 - Processing parameters

SI 16384  
SF 499.7888646 MHz  
WDW EM  
SSB 0  
LB 0.30 Hz  
GB 0  
PC 1.00

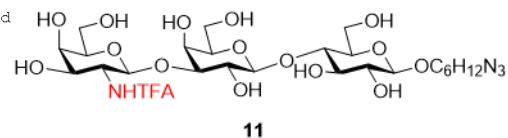

4.7897  
4.7289  
4.7122  
4.4675  
4.4515  
4.4159  
4.4002  
4.1606  
4.1547  
4.0220  
4.0056  
4.0006  
3.9835  
3.9523  
3.9461  
3.9287  
3.9137  
3.9032  
3.9003  
3.8940  
3.8790  
3.8715  
3.8560  
3.8497  
3.8091  
3.7932  
3.7855  
3.7806  
3.7698  
3.7632  
3.7546  
3.7464  
3.7298  
3.7222  
3.7001  
3.6856  
3.6782  
3.6735  
3.6592  
3.6534  
3.6392  
3.6238  
3.6143  
3.6062  
3.5830  
3.5668  
3.5477  
3.5199  
3.5062  
3.2920  
3.2733  
3.2585  
1.6508  
1.6395  
1.6221  
1.6096  
1.5965  
1.5830  
1.5698  
1.5940  
1.5871  
1.5796  
1.5727  
1.5665

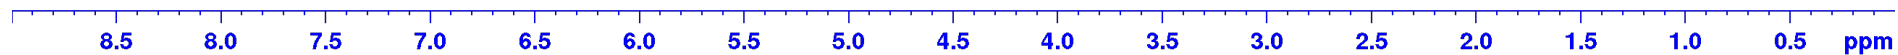

1.11  
1.07  
1.00  
0.99  
0.98  
2.07  
0.96  
1.11  
3.99  
5.12  
2.26  
2.23  
3.15  
4.08  
4.18

<sup>1</sup>H NMR spectrum of Compound 11 (500 MHz D<sub>2</sub>O)

THK-0-TFA-GAA7

Current Data Parameters  
NAME THK-264-TFA-20200203-13C.fid  
EXPNO 1  
PROCNO 1

F2 - Processing parameters  
SI 65536  
SF 125.6718829 MHz  
WDW EM  
SSE 0  
LB 0.30 Hz  
GB 0  
PC 1.00

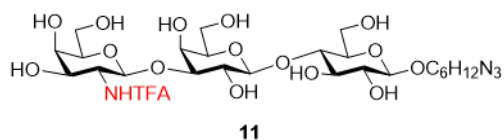

161.113  
160.811  
160.516  
160.225

120.307  
118.023  
115.744  
113.455

103.988  
103.545  
103.110

83.138  
79.353  
76.119  
75.892  
75.759  
75.493  
73.880  
71.466  
71.049  
70.979  
69.401  
68.761  
61.964  
61.941  
61.113  
54.463  
52.122  
49.525  
49.352  
49.160  
49.007  
48.835  
48.662  
48.490

29.649  
28.941  
26.717  
25.656

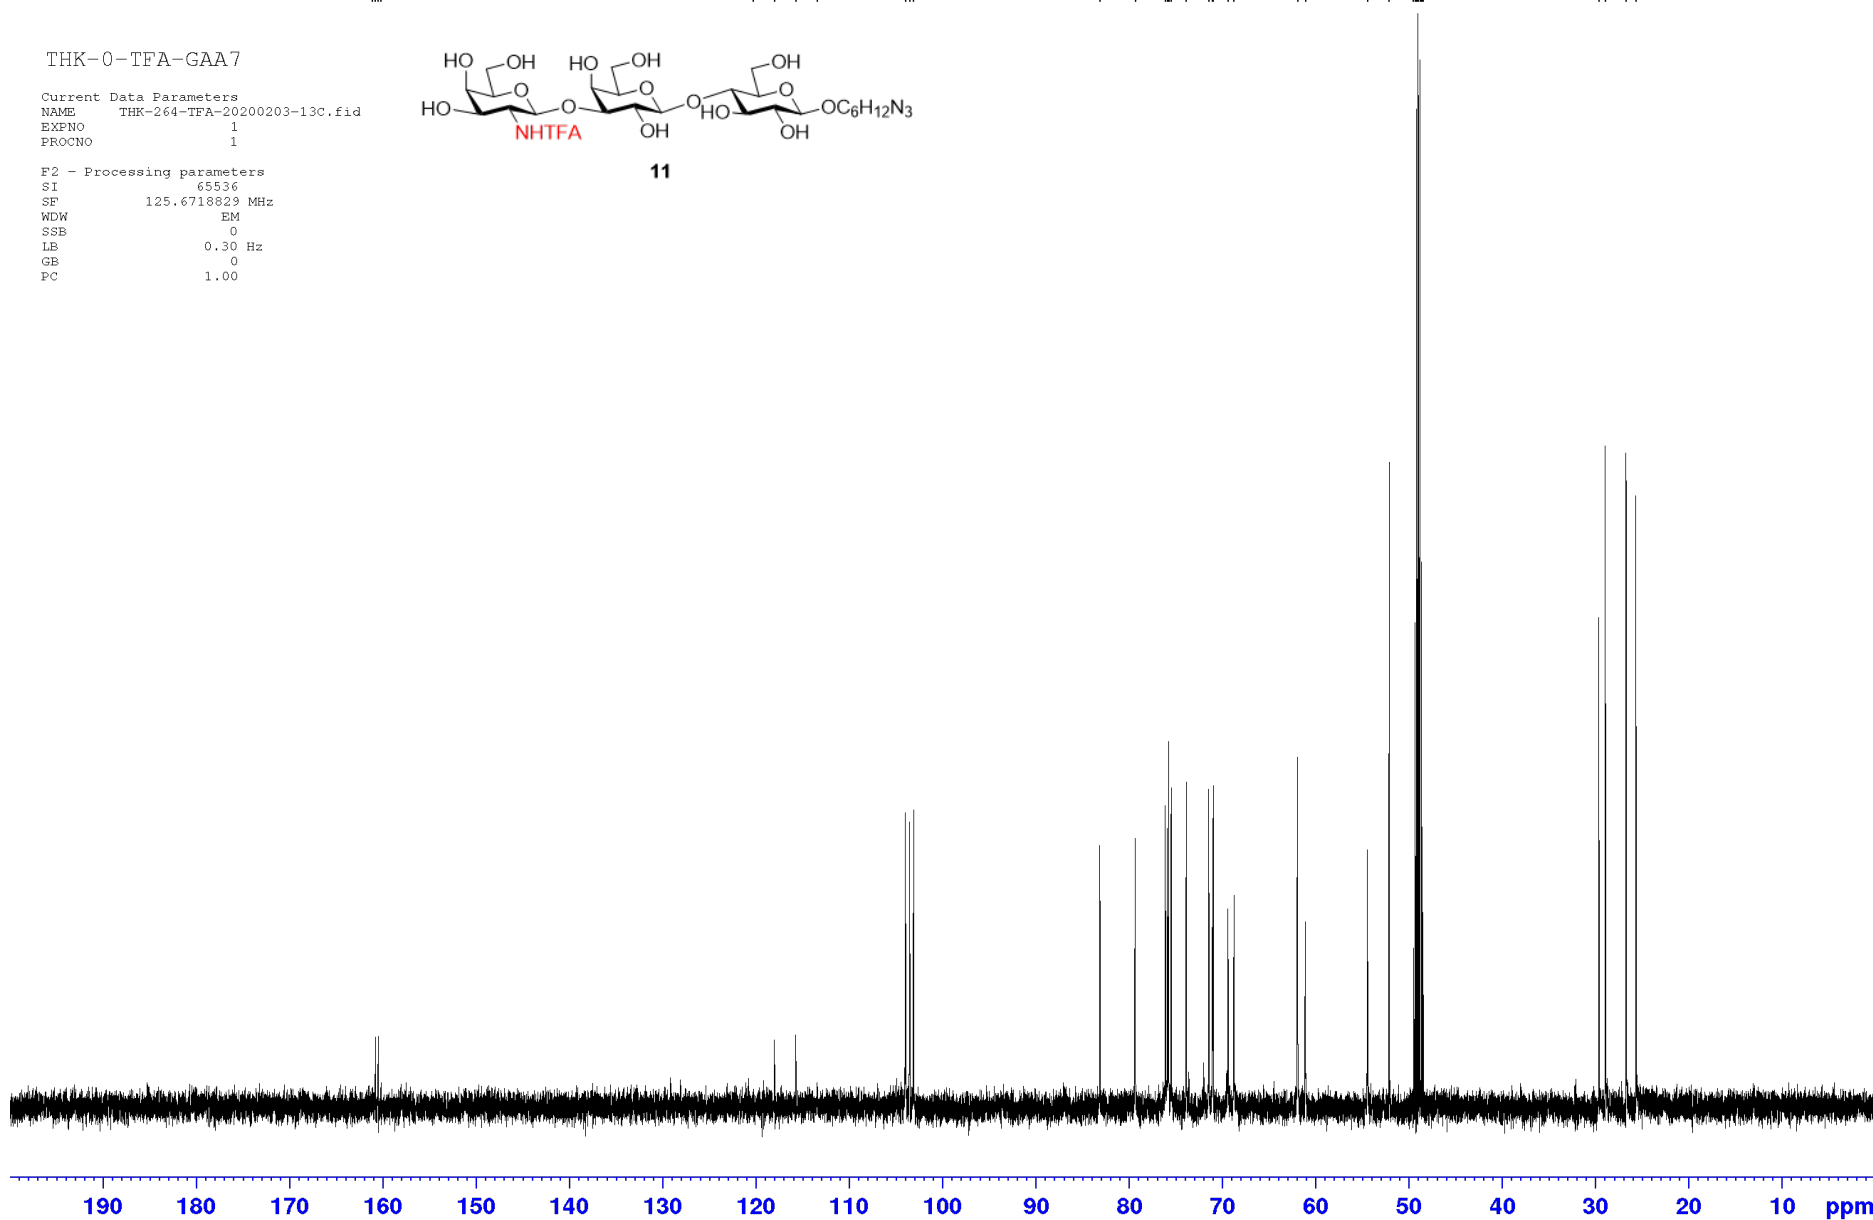

$^{13}\text{C}$  NMR spectrum of Compound 11 (125 MHz  $\text{D}_2\text{O}$ )

THK-0-NH2-GAA7

Current Data Parameters  
NAME THK-264-NH2-20200206-1H.fid  
EXPNO 1  
PROCNO 1

F2 - Processing parameters  
SI 16384  
SF 499.7888651 MHz  
WDW EM  
SSB 0  
LB 0.30 Hz  
GB 0  
PC 1.00

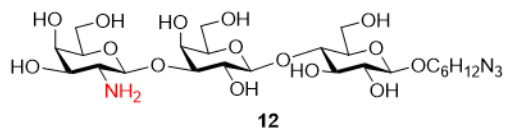

4.7894  
4.5059  
4.4895  
4.4739  
4.4581  
4.1709  
4.1655  
3.9787  
3.9551  
3.9317  
3.8181  
3.8083  
3.8055  
3.8382  
3.8329  
3.8002  
3.7965  
3.7762  
3.7649  
3.7543  
3.7387  
3.7305  
3.7137  
3.6908  
3.6778  
3.6601  
3.6433  
3.6332  
3.6229  
3.6046  
3.5854  
3.5750  
3.5398  
3.5341  
3.5190  
3.5133  
3.3213  
3.3075  
3.2937  
3.2843  
3.2674  
2.9108  
2.8920  
2.8739  
1.6530  
1.6372  
1.6250  
1.6118  
1.5963  
1.5850  
1.5700  
1.3968  
1.3897  
1.3819  
1.3745  
1.3665

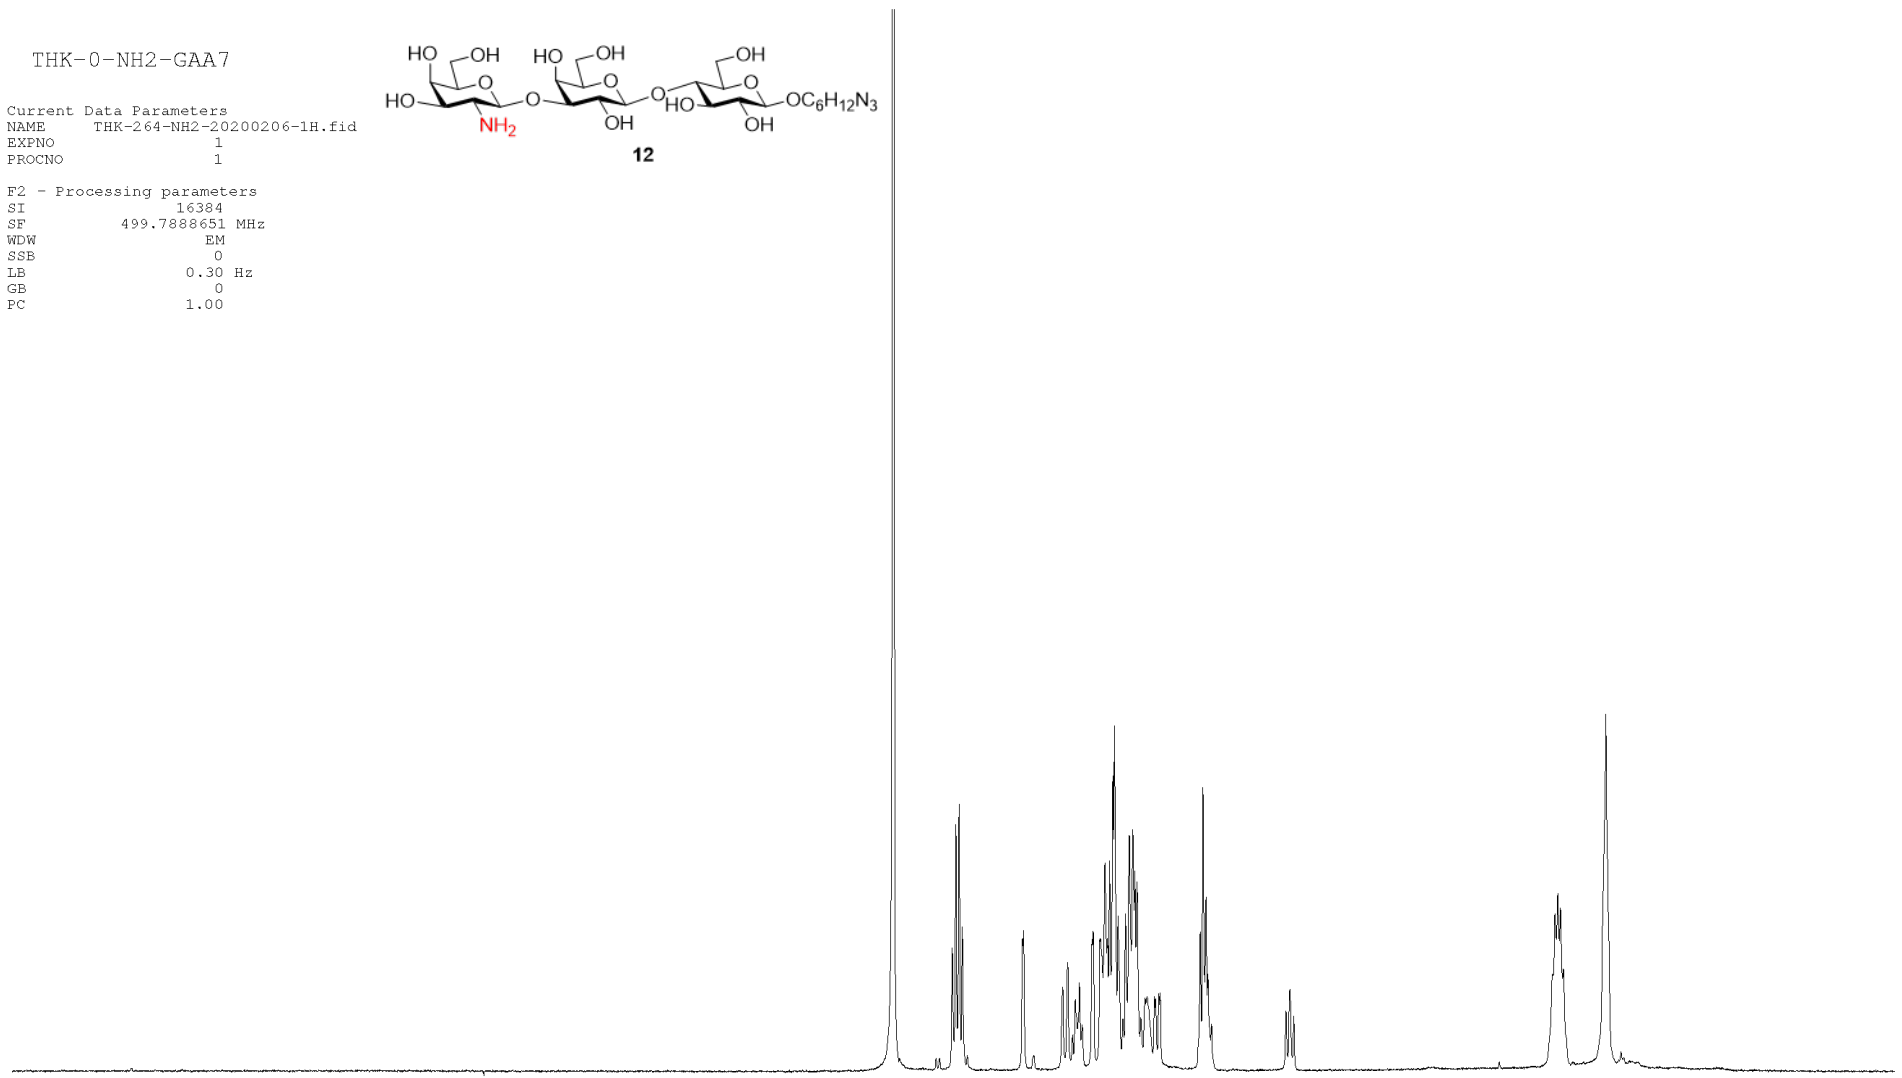

3.12  
1.02  
1.04  
1.20  
1.02  
7.14  
1.05  
4.99  
1.15  
1.07  
3.19  
1.00  
4.04  
4.20

<sup>1</sup>H NMR spectrum of Compound 12 (500 MHz D<sub>2</sub>O)



THK-0-NH2-GAA7

Current Data Parameters  
NAME THK-264-NH2-20200206-13c.fid  
EXPNO 1  
PROCNO 1

F2 - Processing parameters  
SI 6536  
SF 125.6718957 MHz  
WDW EM  
SSB 0  
LB 0.30 Hz  
GB 0  
PC 1.00

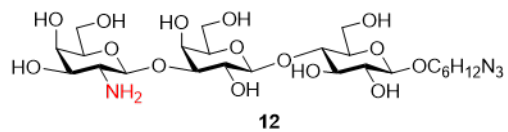

106.263  
103.659  
102.996

83.071  
79.371  
76.148  
75.958  
75.699  
75.432  
73.874  
73.794  
71.497  
71.131  
69.339  
68.813  
62.076  
61.933  
61.068  
54.163  
52.087  
49.528  
49.344  
49.172  
48.998  
48.826  
48.654  
48.491

29.544  
28.841  
26.620  
25.564

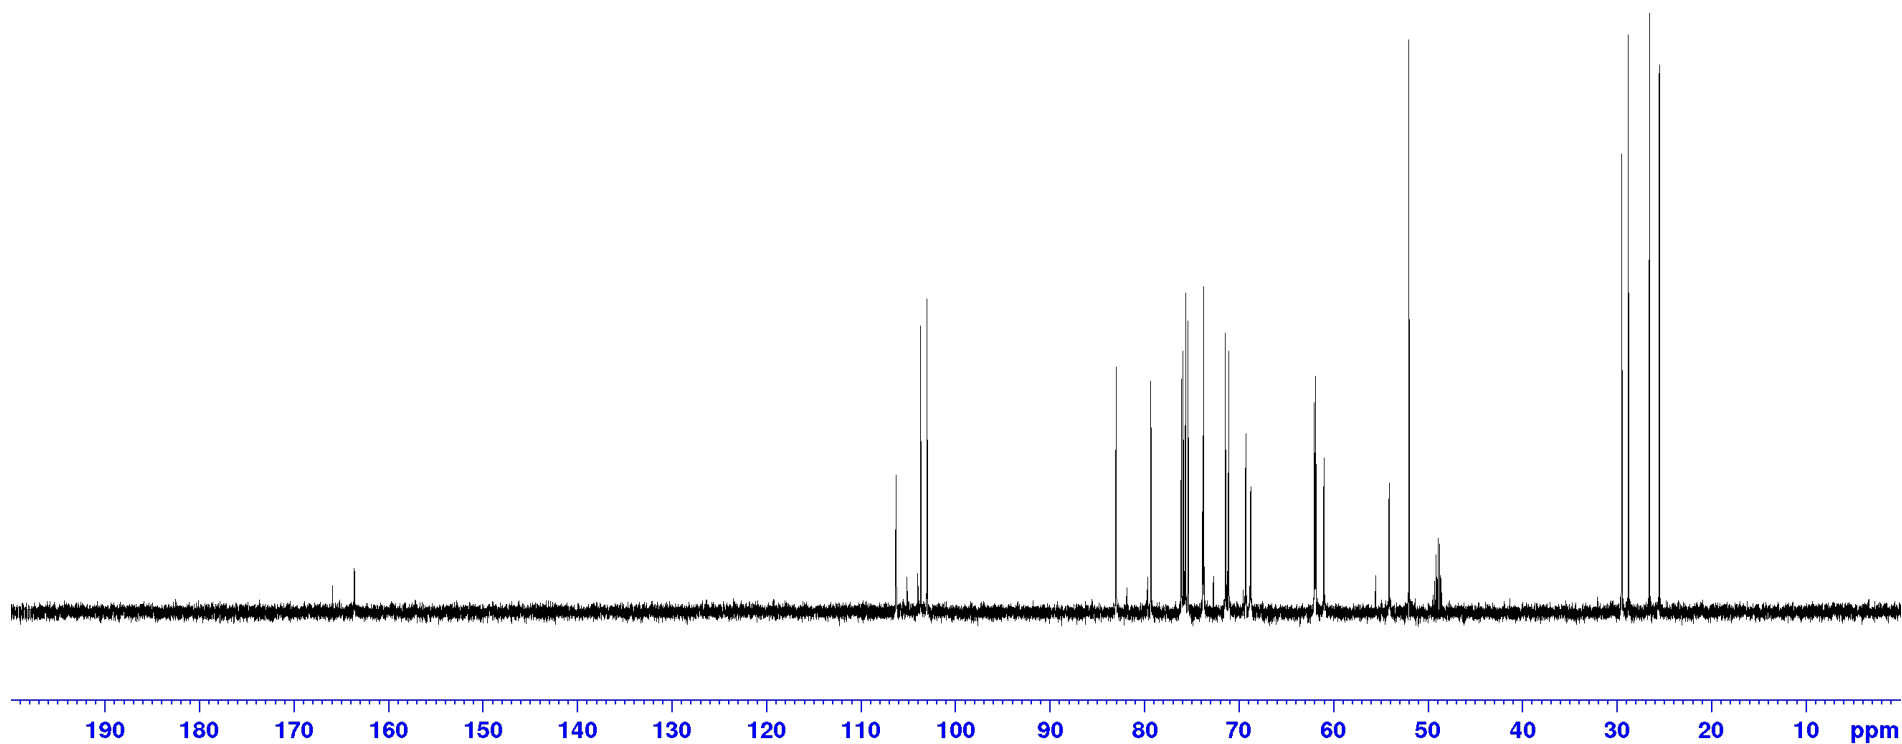

<sup>13</sup>C NMR spectrum of Compound 12 (125 MHz D<sub>2</sub>O)

THK-3A-NH2-GAA7

Current Data Parameters  
NAME THK-267-20200210.fid  
EXPNO 1  
PROCNO 1

F2 - Processing parameters  
SI 16384  
SF 499.7888646 MHz  
WDW EM  
SSB 0  
LB 0.30 Hz  
GB 0  
PC 1.00

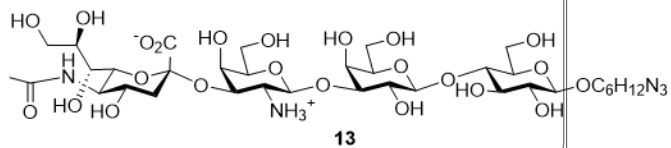

4.7896  
4.6658  
4.6496  
4.6333  
4.5041  
4.4883  
4.4765  
4.4605  
4.1776  
4.1720  
4.0954  
4.0900  
4.0747  
4.0687  
3.9798  
3.9570  
3.9346  
3.9207  
3.9126  
3.9071  
3.9029  
3.8881  
3.8707  
3.8596  
3.8394  
3.8186  
3.8084  
3.7989  
3.7825  
3.7720  
3.7532  
3.7325  
3.7159  
3.6948  
3.6788  
3.6698  
3.6538  
3.6389  
3.6249  
3.6060  
3.5858  
3.5626  
3.3251  
3.3112  
3.2977  
3.2865  
3.2697  
3.0514  
3.0322  
3.0140  
2.7730  
2.7576  
2.7489  
2.0164  
1.7914  
1.7671  
1.7430  
1.6556  
1.6403  
1.6282  
1.6153  
1.6019  
1.5884  
1.5745  
1.3998  
1.3932  
1.3853  
1.3792  
1.3714

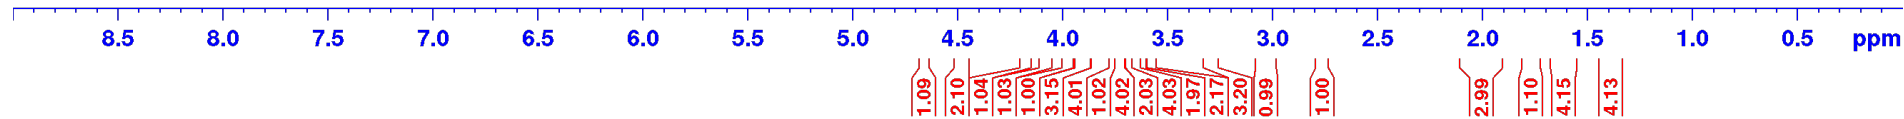

<sup>1</sup>H NMR spectrum of Compound 13 (500 MHz D<sub>2</sub>O)

THK-3A-NH2-GAA7

Current Data Parameters  
NAME THK-267-a23-20200210-13C.fid  
EXPNO 1  
PROCNO 1

F2 - Processing parameters  
SI 65536  
SF 125.6718946 MHz  
WDW EM  
SSB 0  
LB 0.30 Hz  
GB 0  
PC 1.00

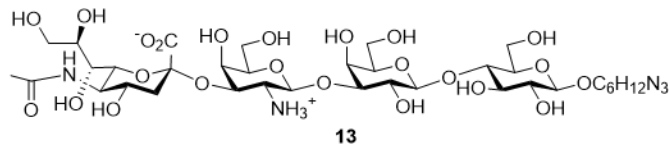

175.971  
174.589

105.105  
103.529  
103.004  
100.525

83.074  
79.269  
75.998  
75.943  
75.702  
75.423  
73.808  
73.794  
72.663  
71.505  
71.111  
69.367  
69.297  
68.972  
67.146  
63.512  
61.964  
61.940  
61.060  
52.736  
52.679  
52.093  
49.513  
49.342  
49.169  
48.936  
48.823  
48.650  
48.479  
40.945  
29.546  
28.844  
26.622  
25.566  
22.993

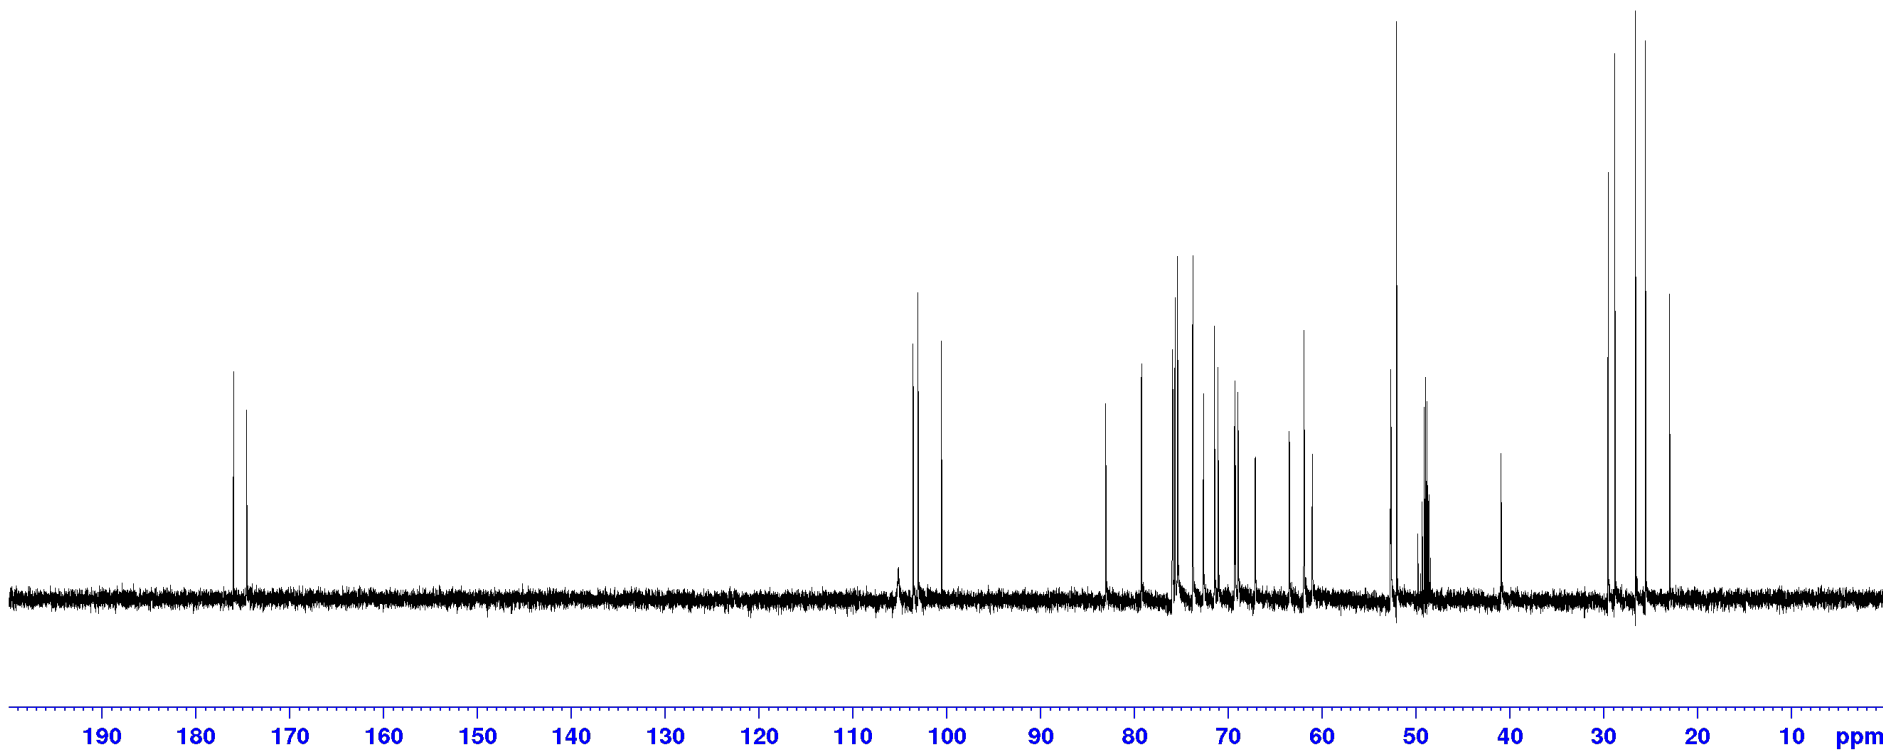

<sup>13</sup>C NMR spectrum of Compound **13** (125 MHz D<sub>2</sub>O)

THK-3GM-NH2-GAA7

Current Data Parameters  
NAME THK-268-2-20200227-1H.fid  
EXPNO 1  
PROCNO 1  
F2 - Processing parameters  
SI 16384  
SF 499.7875556 MHz  
WDW EM  
SSB 0  
LB 0.30 Hz  
GB 0  
PC 1.00

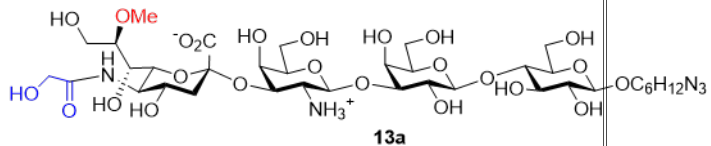

4.7893  
4.5286  
4.5122  
4.4875  
4.4717  
4.4633  
4.4472  
4.1612  
4.1553  
4.0894  
4.0138  
3.9983  
3.9927  
3.9774  
3.9723  
3.9484  
3.9370  
3.9199  
3.9154  
3.8934  
3.8735  
3.7968  
3.7820  
3.7746  
3.7628  
3.7576  
3.7395  
3.7192  
3.7036  
3.6974  
3.6806  
3.6794  
3.6671  
3.6578  
3.6538  
3.6472  
3.6359  
3.6287  
3.6224  
3.6171  
3.6112  
3.5949  
3.5715  
3.5589  
3.5412  
3.5318  
3.5266  
3.5210  
3.5092  
3.5042  
3.4949  
3.4648  
3.4188  
3.3110  
3.2972  
3.2855  
3.2718  
3.2547  
2.9659  
2.9491  
2.9455  
2.9286  
2.7025  
2.6937  
2.6783  
2.6699  
1.7476  
1.7235  
1.6419  
1.6275  
1.6148  
1.6016  
1.5879  
1.5744  
1.5600  
1.3855  
1.3786  
1.3717  
1.3637  
1.3562

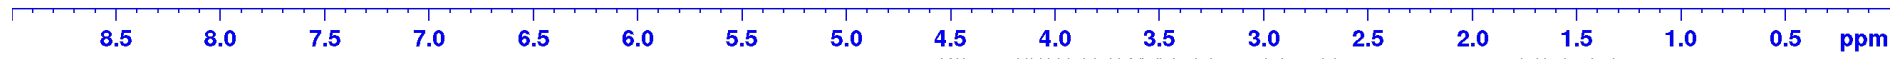

1.06  
1.07  
1.05  
1.07  
2.02  
1.15  
2.19  
4.17  
4.36  
4.34  
3.00  
3.14  
3.15  
3.16  
3.23  
1.00  
1.00  
1.10  
4.17  
4.21

<sup>1</sup>H NMR spectrum of Compound 13a (500 MHz D<sub>2</sub>O)

176.727  
174.549

106.332  
103.583  
102.999  
100.939  
83.200  
80.924  
79.363  
76.169  
75.961  
75.921  
75.700  
75.432  
73.801  
73.262  
71.500  
71.143  
69.363  
68.813  
68.071  
67.432  
62.071  
61.956  
61.063  
60.155  
58.421  
52.748  
52.642  
52.093  
49.515  
49.342  
49.169  
48.997  
48.825  
48.651  
48.480  
41.082  
39.545  
38.840  
36.619  
35.563

THK-3GM-NH2-GAA7

Current Data Parameters  
NAME THK-268-2-20200227-13c.fid  
EXPNO 1  
PROCNO 1

F2 - Processing parameters  
SI 65536  
SF 125.6715669 MHz  
WDW EM  
SSB 0  
LB 0.30 Hz  
GB 0  
PC 1.00

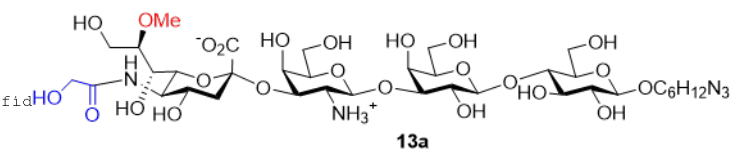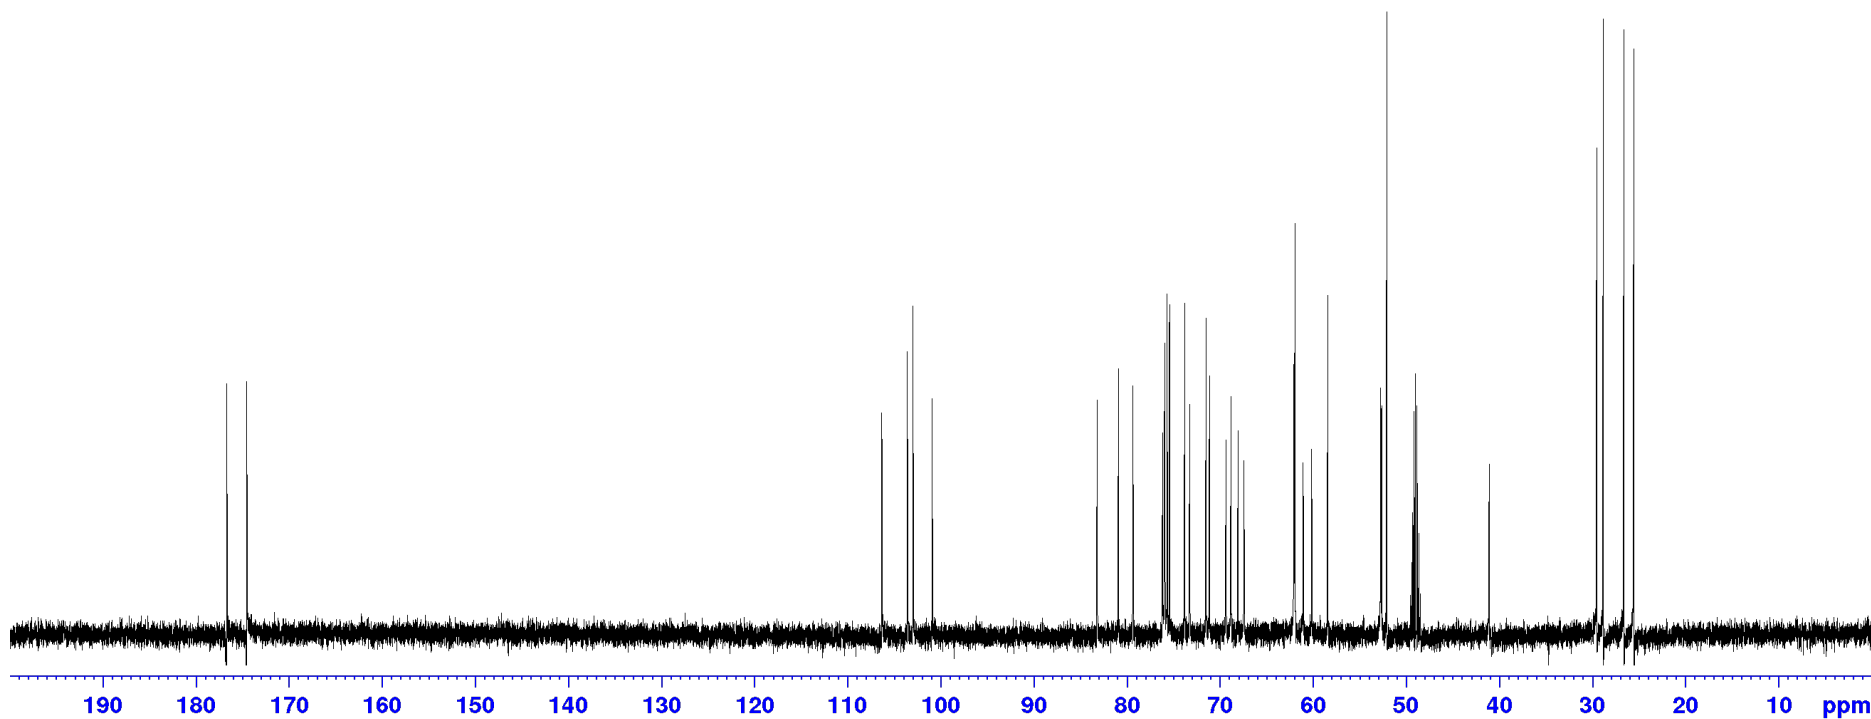

<sup>13</sup>C NMR spectrum of Compound 13a (125 MHz D<sub>2</sub>O)

THK-0-N3-GAA7

Current Data Parameters  
NAME THK-137-2-1H.fid  
EXPNO 1  
PROCNO 1

F2 - Processing parameters  
SI 16384  
SF 499.7914730 MHz  
WDW EM  
SSB 0  
LB 0.30 Hz  
GB 0  
PC 1.00

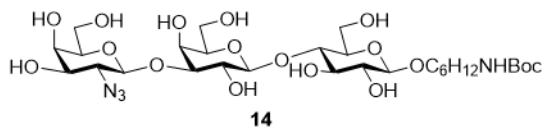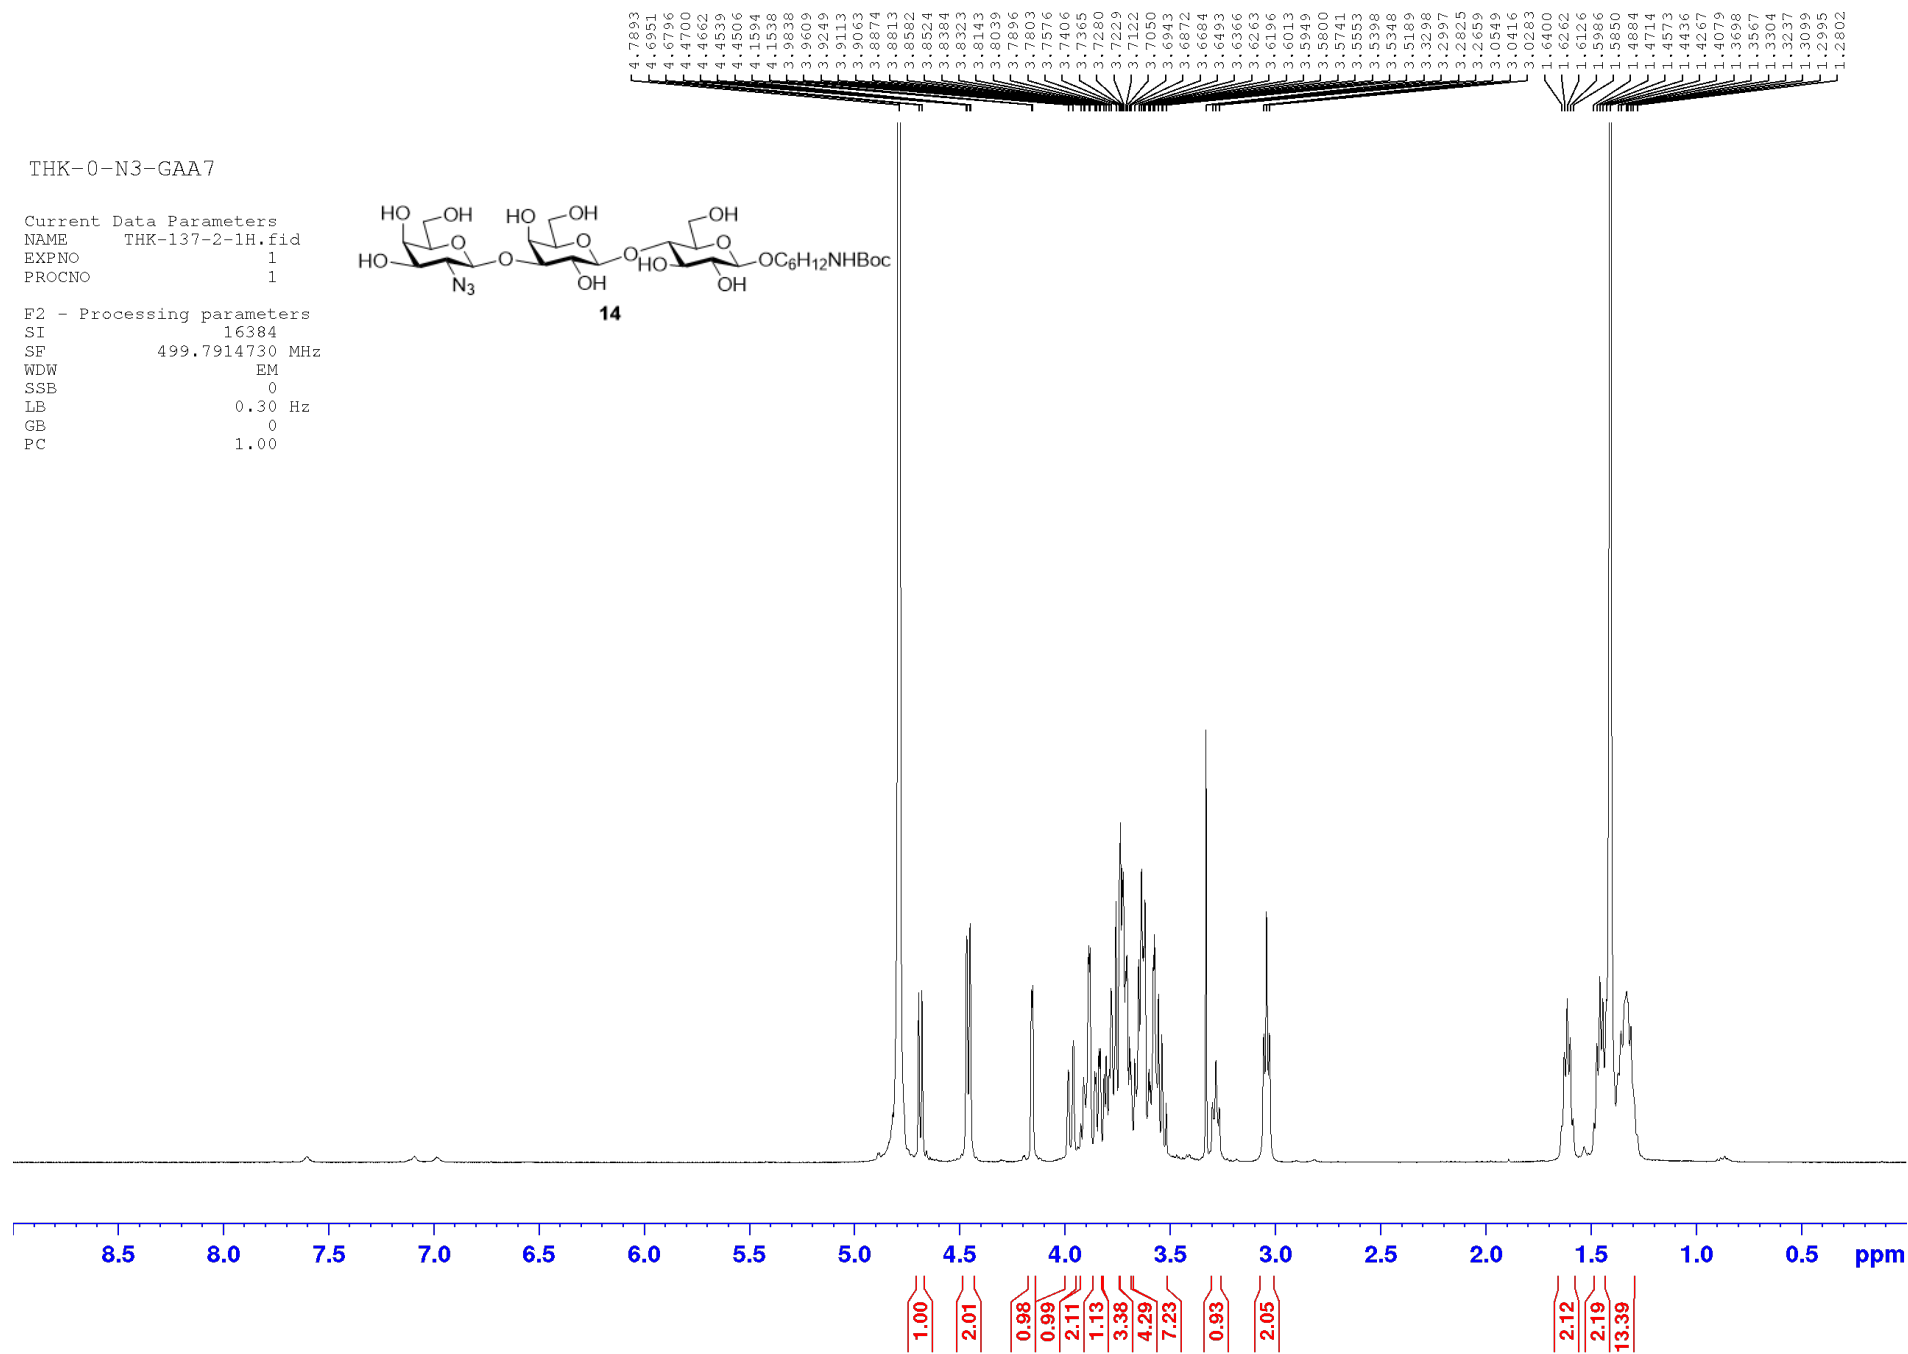

<sup>1</sup>H NMR spectrum of Compound 14 (500 MHz D<sub>2</sub>O)

THK-0-N3-GAA7

Current Data Parameters  
NAME THK-137-2-13C-20190427.fid  
EXPNO 1  
PROCNO 1  
F2 - Processing parameters  
SI 65536  
SF 125.6725426 MHz  
WDW EM  
SSB 0  
LE 0.30 Hz  
GB 0  
PC 1.00

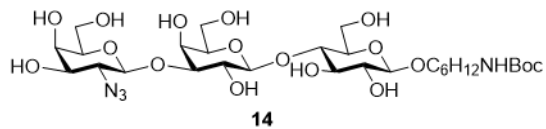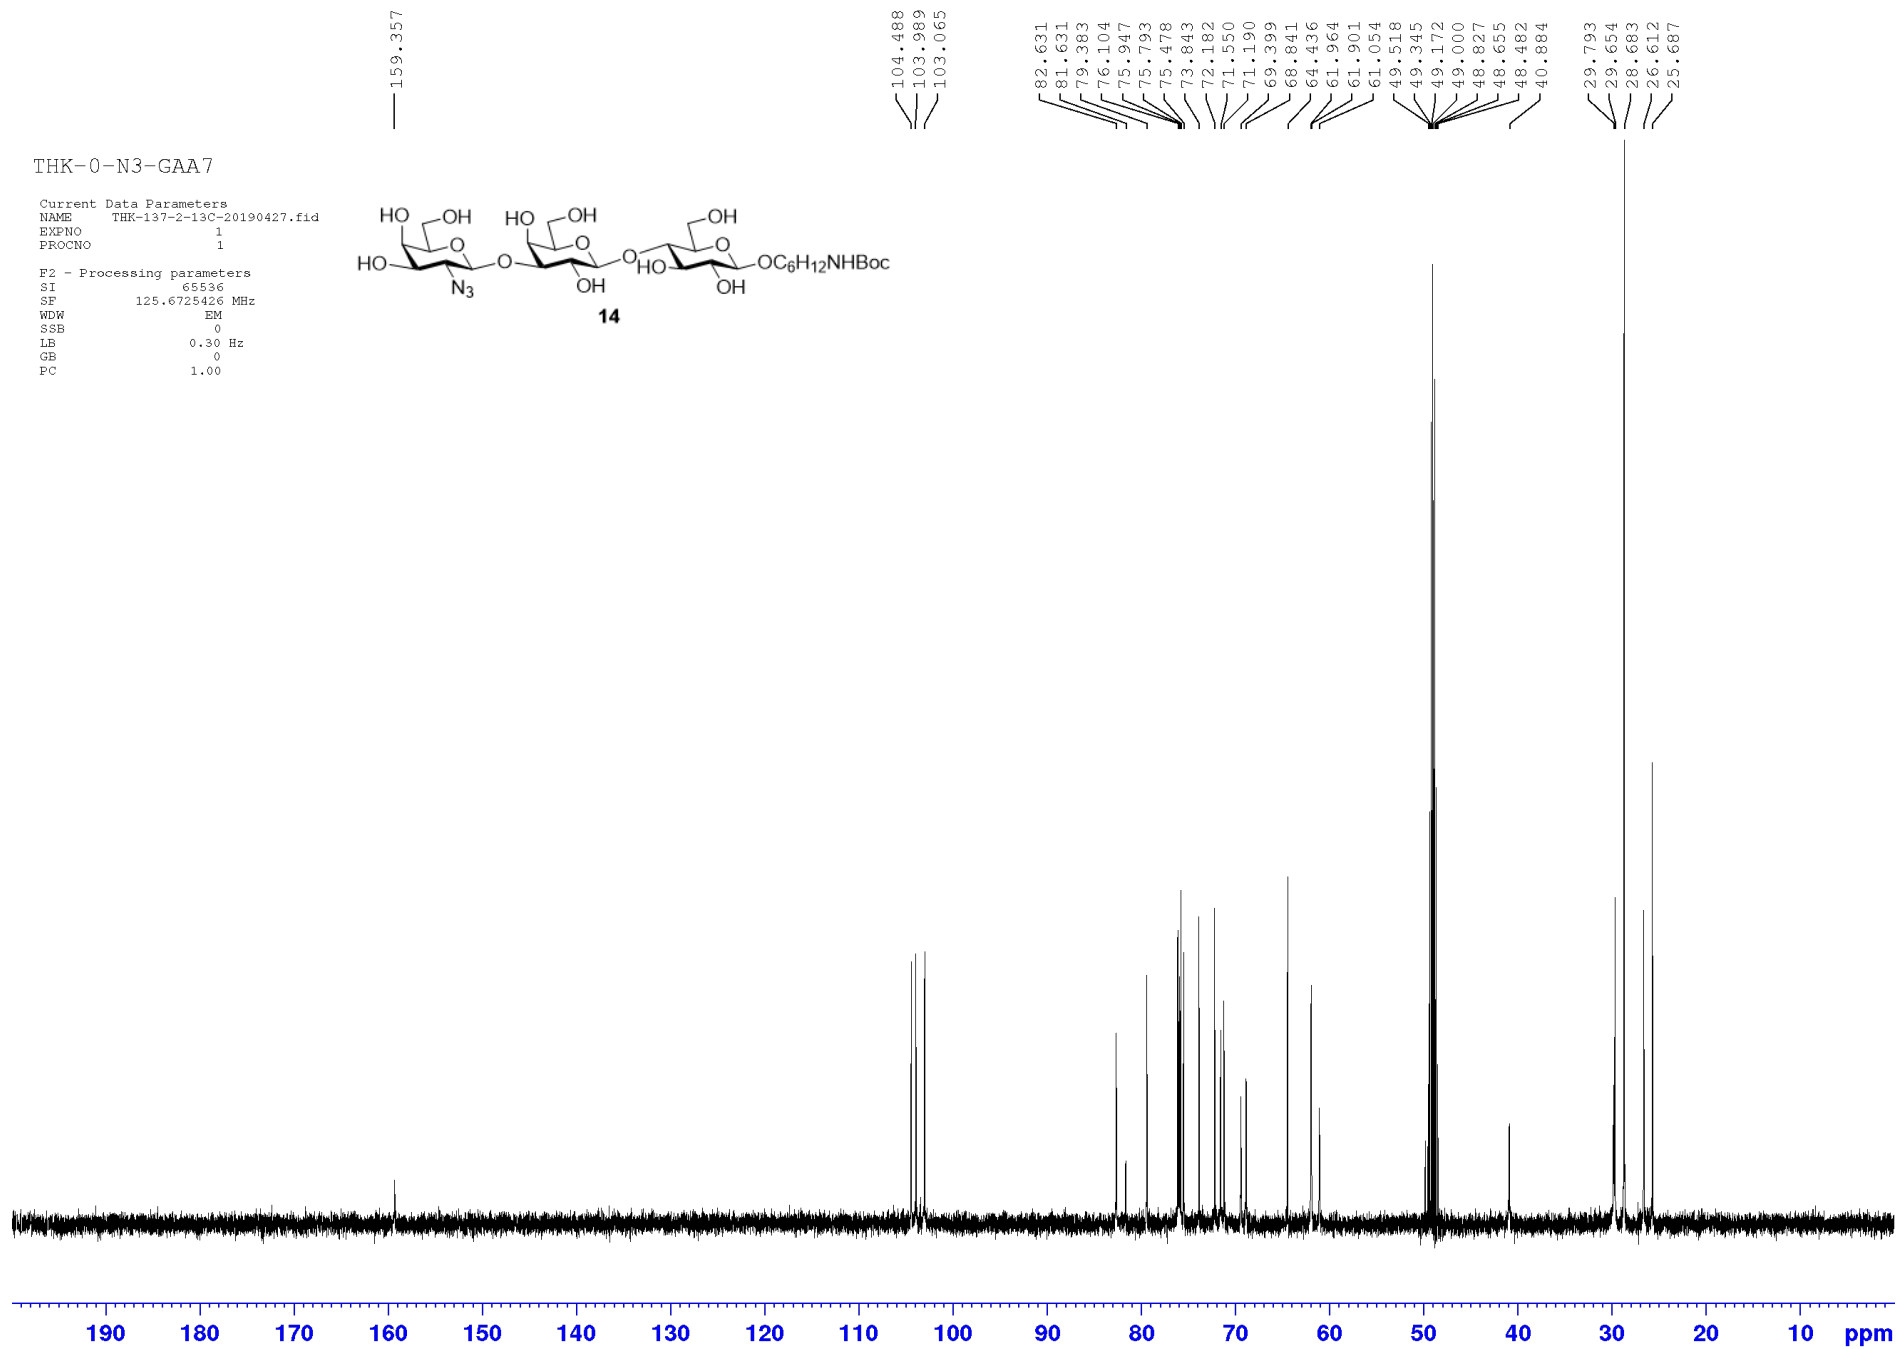

$^{13}C$  NMR spectrum of Compound **14** (125 MHz  $D_2O$ )

8.4330

THK-3A-N3-GAA7

Current Data Parameters  
NAME THK-234-P-20191120.fid  
EXPNO 1  
PROCNO 1

F2 - Processing parameters  
SI 16384  
SF 499.7895105 MHz  
WDW EM  
SSB 0  
LB 0.30 Hz  
GB 0  
PC 1.00

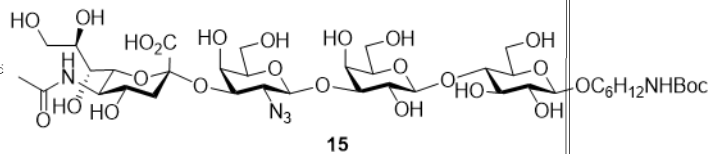

4.7893  
4.6543  
4.6378  
4.4728  
4.4569  
4.1622  
4.1568  
4.1413  
3.9851  
3.9613  
3.9522  
3.9470  
3.9291  
3.9183  
3.9166  
3.8994  
3.8805  
3.8652  
3.8483  
3.8401  
3.8285  
3.8166  
3.8065  
3.7920  
3.7798  
3.7719  
3.7540  
3.7406  
3.7334  
3.7208  
3.7178  
3.7080  
3.6920  
3.6878  
3.6724  
3.6647  
3.6550  
3.6406  
3.6317  
3.6209  
3.5994  
3.5819  
3.5755  
3.5618  
3.5289  
3.5256  
3.5077  
3.5046  
3.3003  
3.2835  
3.2669  
3.0583  
3.0451  
3.0318  
2.7895  
2.7806  
2.7653  
2.7564  
2.0195  
1.8232  
1.7991  
1.7793  
1.6426  
1.6291  
1.6155  
1.6014  
1.5879  
1.4885  
1.4745  
1.4604  
1.4468  
1.4110  
1.3727  
1.3593  
1.3335  
1.3129  
1.3001  
1.2823

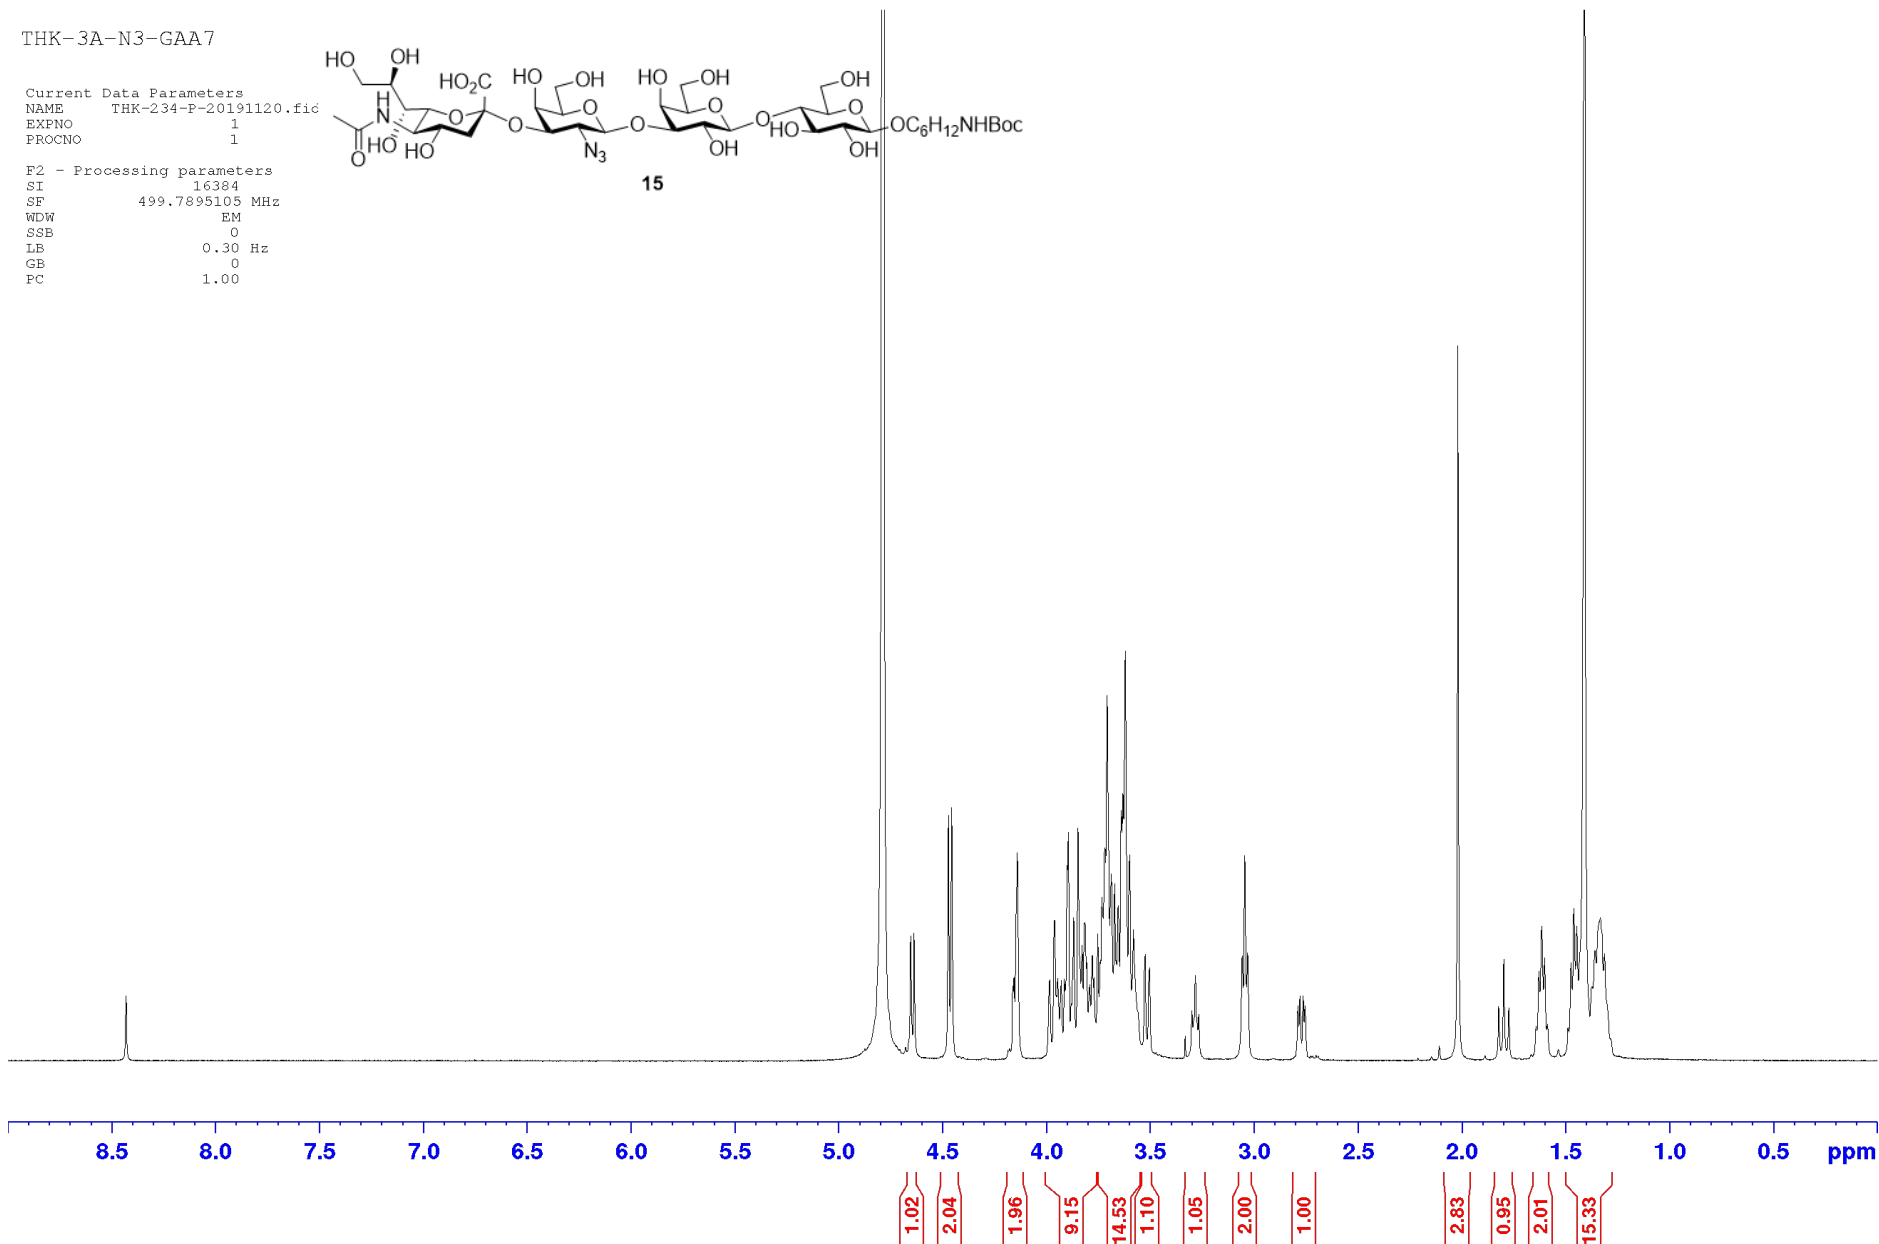

<sup>1</sup>H NMR spectrum of Compound 15 (500 MHz D<sub>2</sub>O)



THK-3A-N3-GAA7

Current Data Parameters  
NAME THK-234-13c-20191121.fid  
EXPNO 1  
PROCNO 1

F2 - Processing parameters  
SI 65536  
SF 125.6720822 MHz  
WDW EM  
SSB 0  
LB 0.30 Hz  
GB 0  
PC 1.00

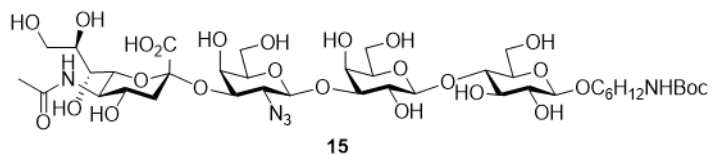

176.076  
174.700

159.259

103.812  
103.683  
102.967  
100.633  
82.587  
81.685  
79.491  
75.872  
75.747  
75.693  
75.411  
74.884  
73.775  
73.740  
72.751  
71.482  
71.066  
69.282  
69.153  
67.657  
63.519  
62.667  
61.871  
61.069  
52.607  
49.516  
49.345  
49.172  
48.999  
48.827  
48.654  
48.482  
40.887  
40.359  
29.688  
29.547  
28.636  
28.489  
25.578  
22.939

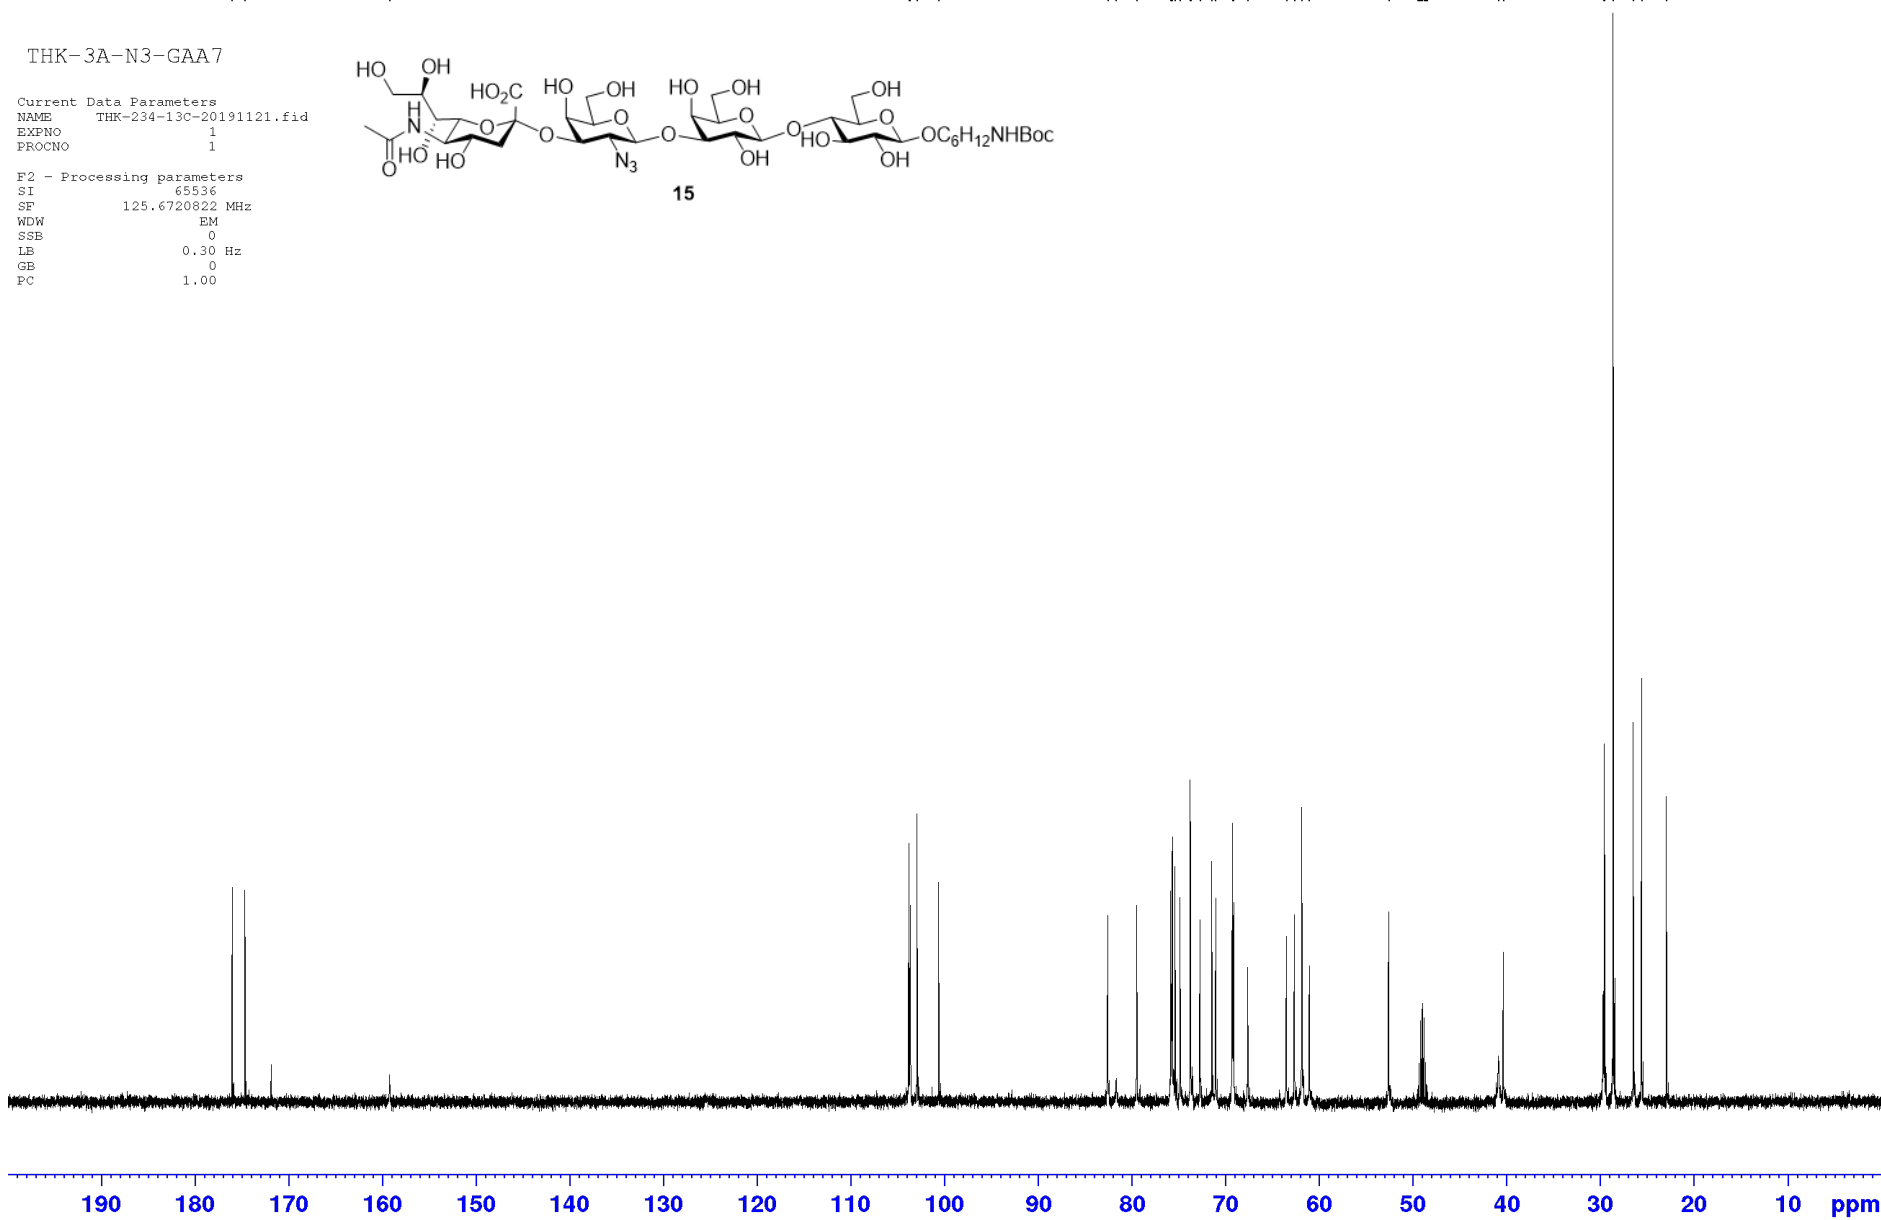

$^{13}\text{C}$  NMR spectrum of Compound 15 (125 MHz  $\text{D}_2\text{O}$ )

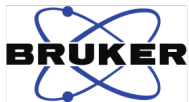

THK-3GM-N3-GAA7

Current Data Parameters  
NAME THK-289-a23-20200411-1H.fid  
EXPNO 1  
PROCNO 1

F2 - Processing parameters  
SI 16384  
SF 499.7882098 MHz  
WDW EM  
SSB 0  
LB 0.30 Hz  
GB 0  
PC 1.00

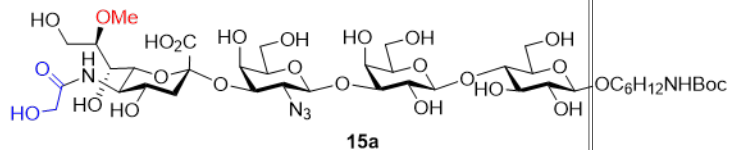

4.7891  
4.7121  
4.6957  
4.5099  
4.4941  
4.1878  
4.1830  
4.1680  
4.1627  
4.1476  
4.0738  
4.0687  
4.0486  
4.0439  
4.0260  
4.0015  
3.9840  
3.9635  
3.9507  
3.9431  
3.9319  
3.9179  
3.9067  
3.8979  
3.8842  
3.8815  
3.8588  
3.8471  
3.8378  
3.8210  
3.8141  
3.7962  
3.7746  
3.7598  
3.7513  
3.7451  
3.7358  
3.7263  
3.7190  
3.7108  
3.6895  
3.6784  
3.6616  
3.6538  
3.6483  
3.6311  
3.6149  
3.5779  
3.5713  
3.5644  
3.5561  
3.5495  
3.4926  
3.3388  
3.3236  
3.3082  
3.0963  
3.0831  
3.0637  
2.7495  
2.7410  
2.7250  
2.7166  
1.8679  
1.8433  
1.8190  
1.6823  
1.6677  
1.6542  
1.6403  
1.6267  
1.6171  
1.5131  
1.4982  
1.4885  
1.4503  
1.4112  
1.3978  
1.3788  
1.3724  
1.3660  
1.3516  
1.3389  
1.3221

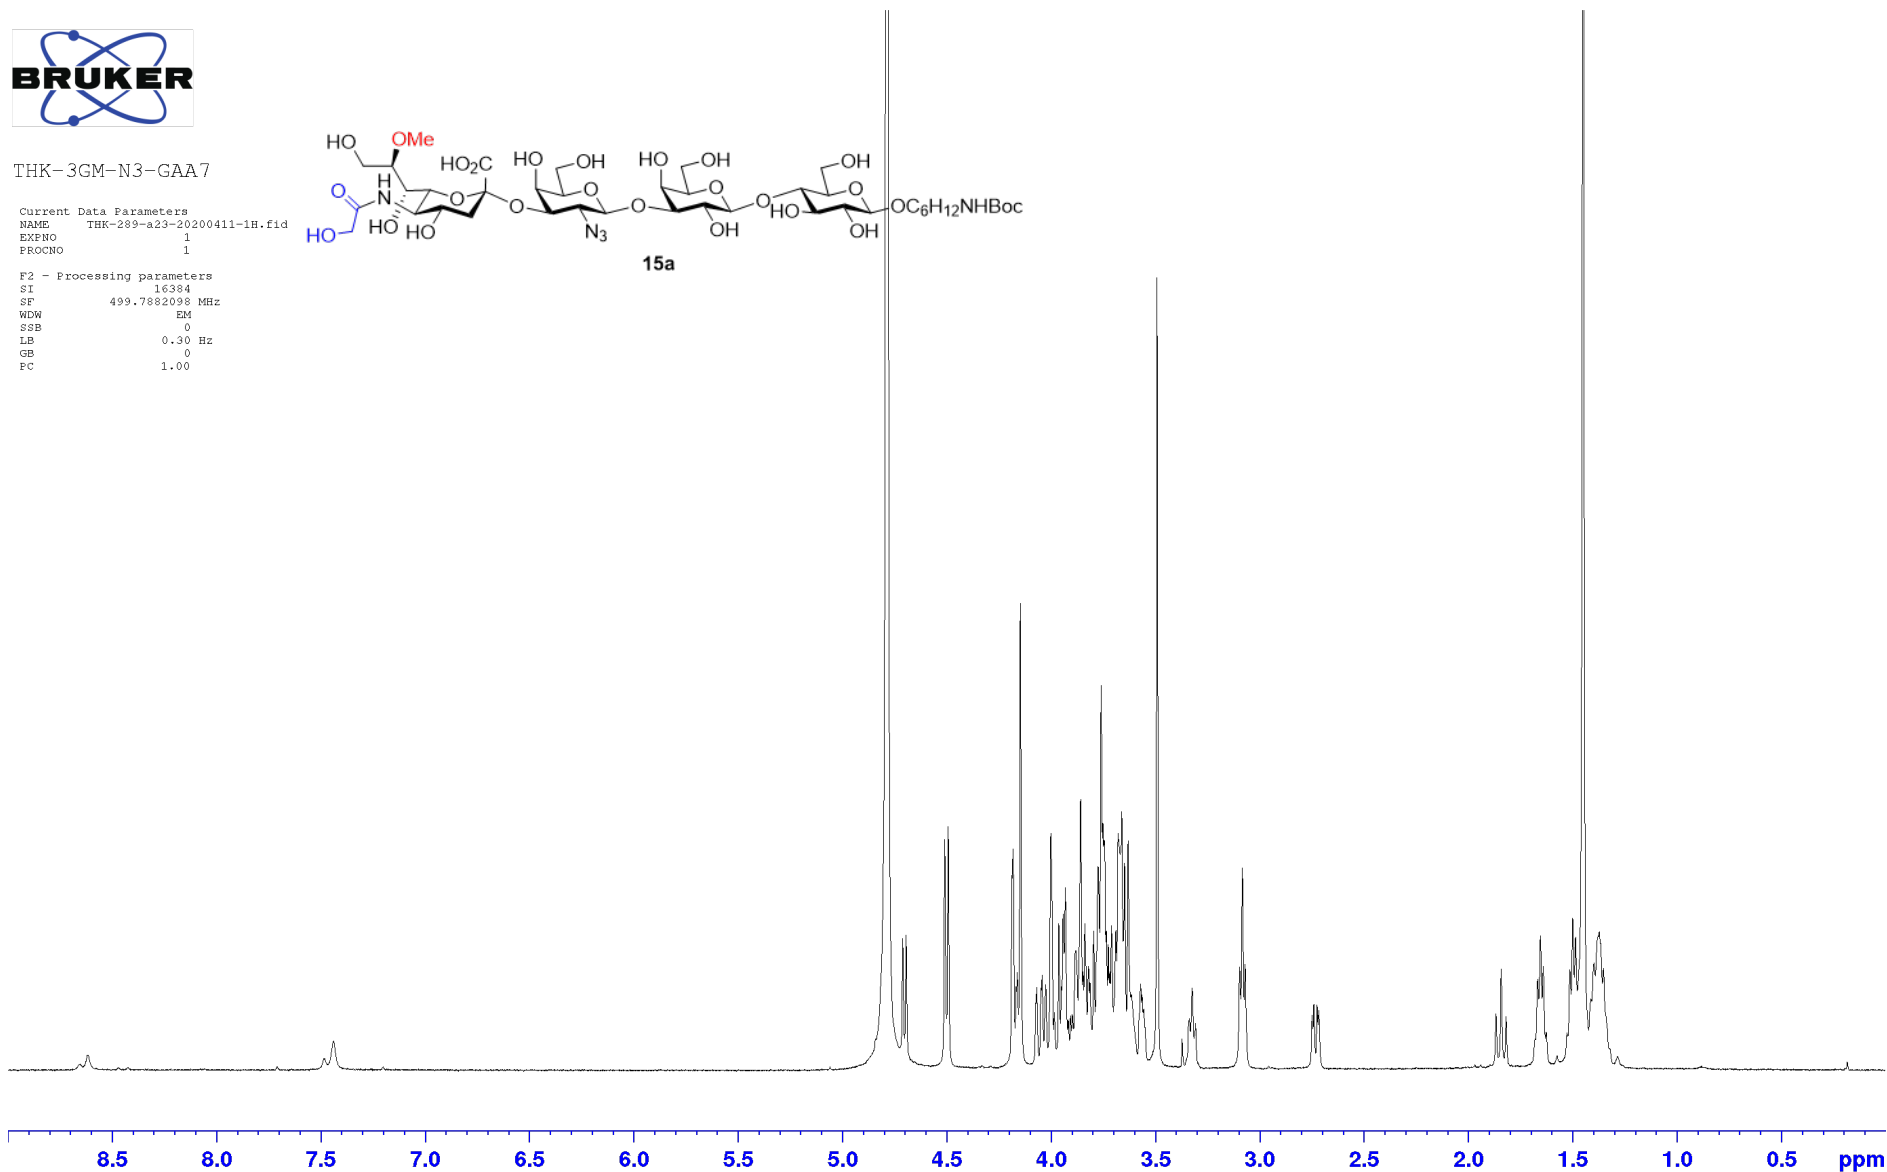

1.07  
2.00  
4.02  
1.08  
2.09  
7.31  
7.16  
4.09  
2.02  
1.09  
3.08  
1.03  
2.00  
1.02  
1.03  
2.14  
15.30

<sup>1</sup>H NMR spectrum of Compound 15a (500 MHz D<sub>2</sub>O)

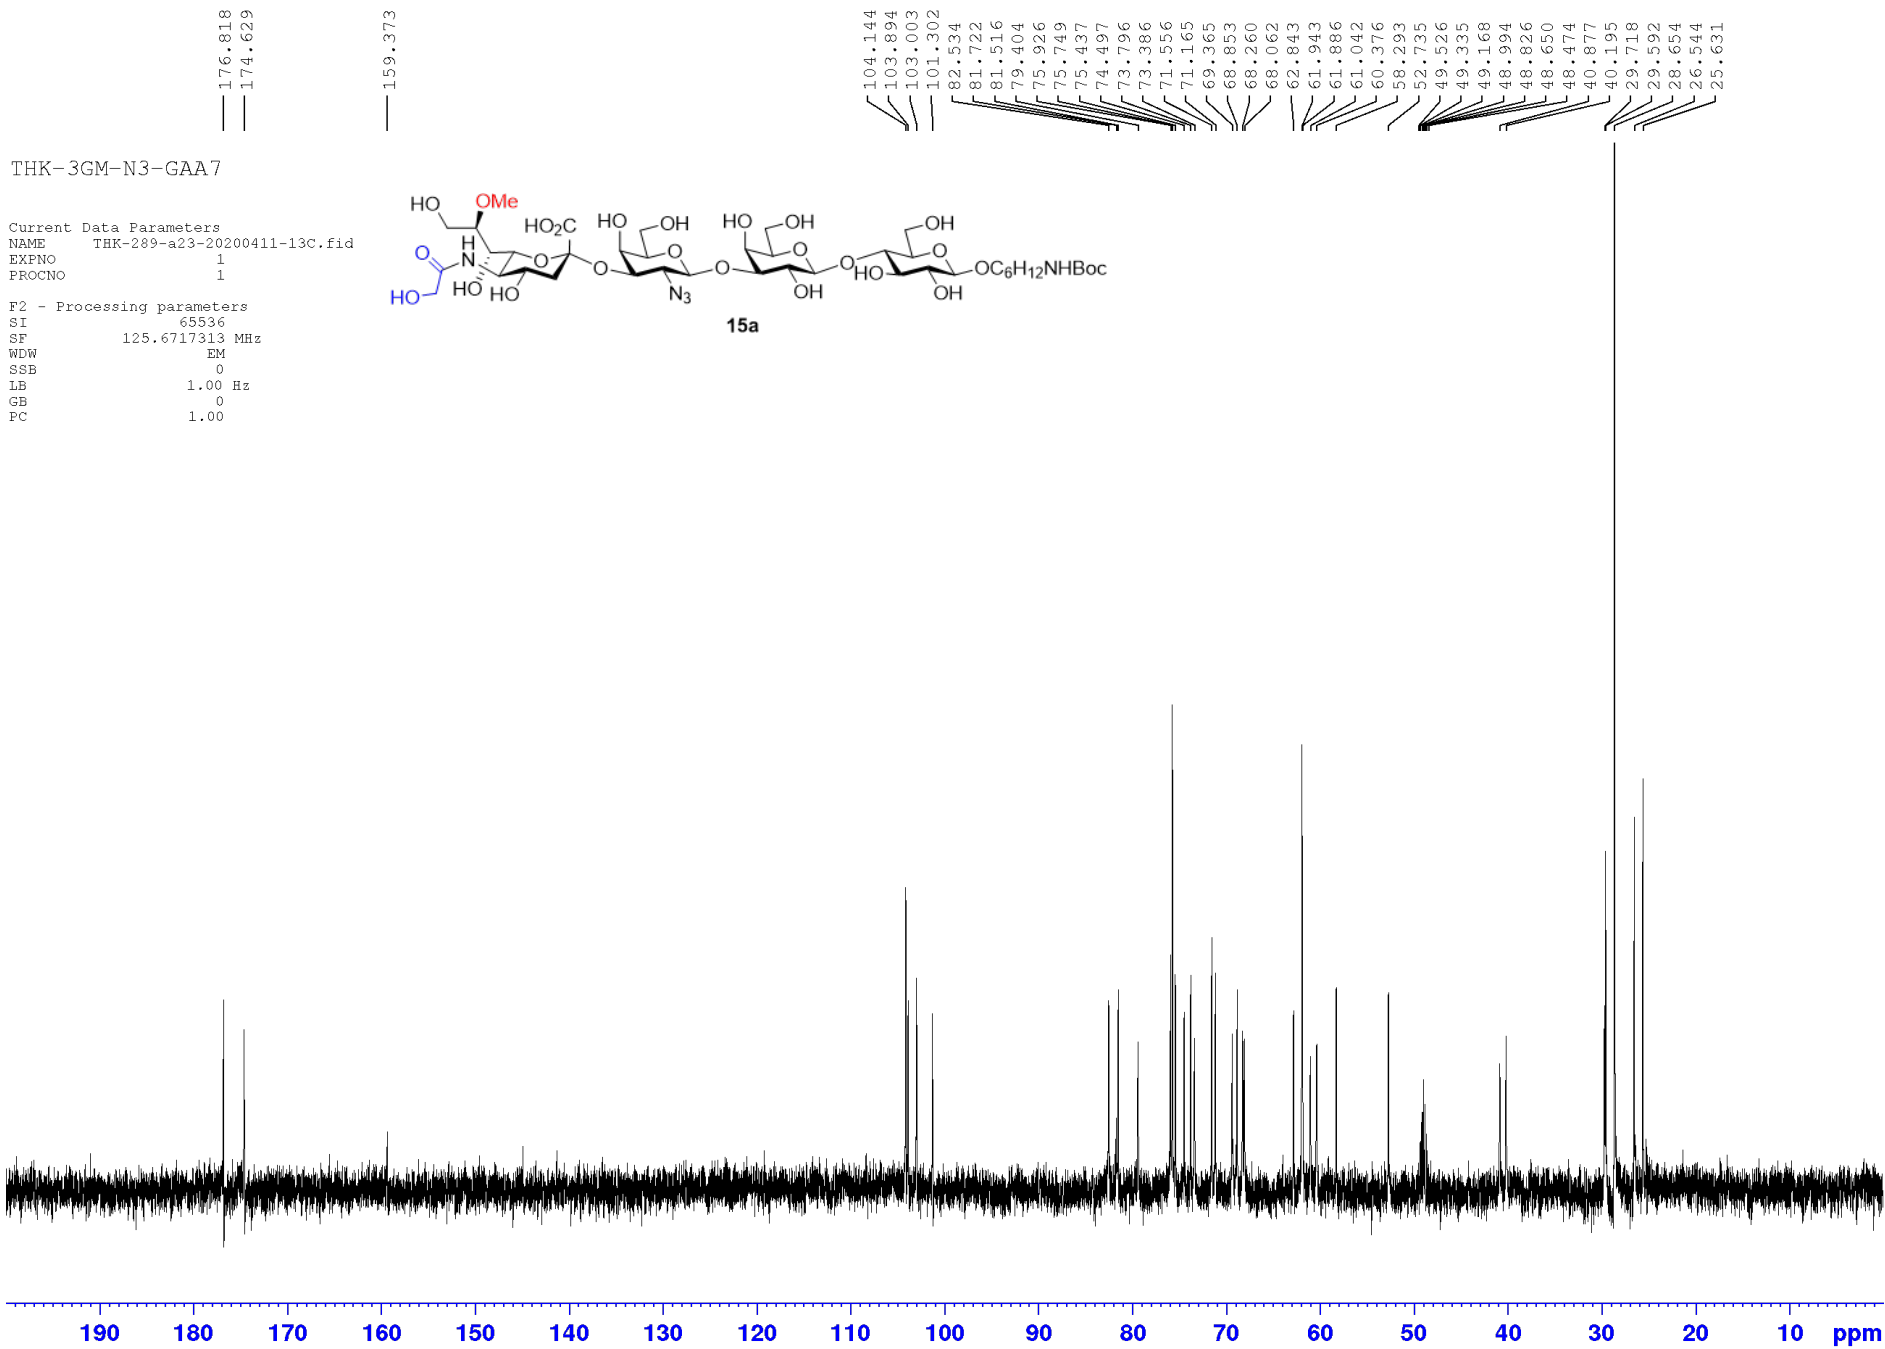

THK-3A-GAA7-Boc

Current Data Parameters  
NAME THK-238-20200223-1H.fid  
EXPNO 1  
PROCNO 1  
F2 - Processing parameters  
SI 16384  
SF 499.7875600 MHz  
WDW EM  
SSB 0  
LB 0.30 Hz  
GB 0  
PC 1.00

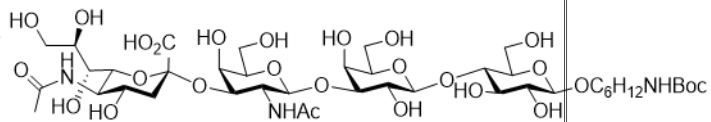

4.7893  
4.7170  
4.7000  
4.4592  
4.4430  
4.4344  
4.4185  
4.1799  
4.1757  
4.1580  
4.1556  
4.1338  
4.1293  
3.9629  
3.9414  
3.9308  
3.9253  
3.9030  
3.8831  
3.8651  
3.8395  
3.7911  
3.7811  
3.7607  
3.7364  
3.7167  
3.6989  
3.6824  
3.6739  
3.6604  
3.6524  
3.6406  
3.6290  
3.6172  
3.6017  
3.5907  
3.5751  
3.5550  
3.4626  
3.4419  
3.2840  
3.2662  
3.2521  
3.0488  
3.0356  
3.0223  
2.6879  
2.6630  
2.6541  
2.0626  
2.0115  
1.6292  
1.6191  
1.6052  
1.5916  
1.5812  
1.4789  
1.4651  
1.4511  
1.4374  
1.4023  
1.3645  
1.3500  
1.3240  
1.3037  
1.2936  
1.2753

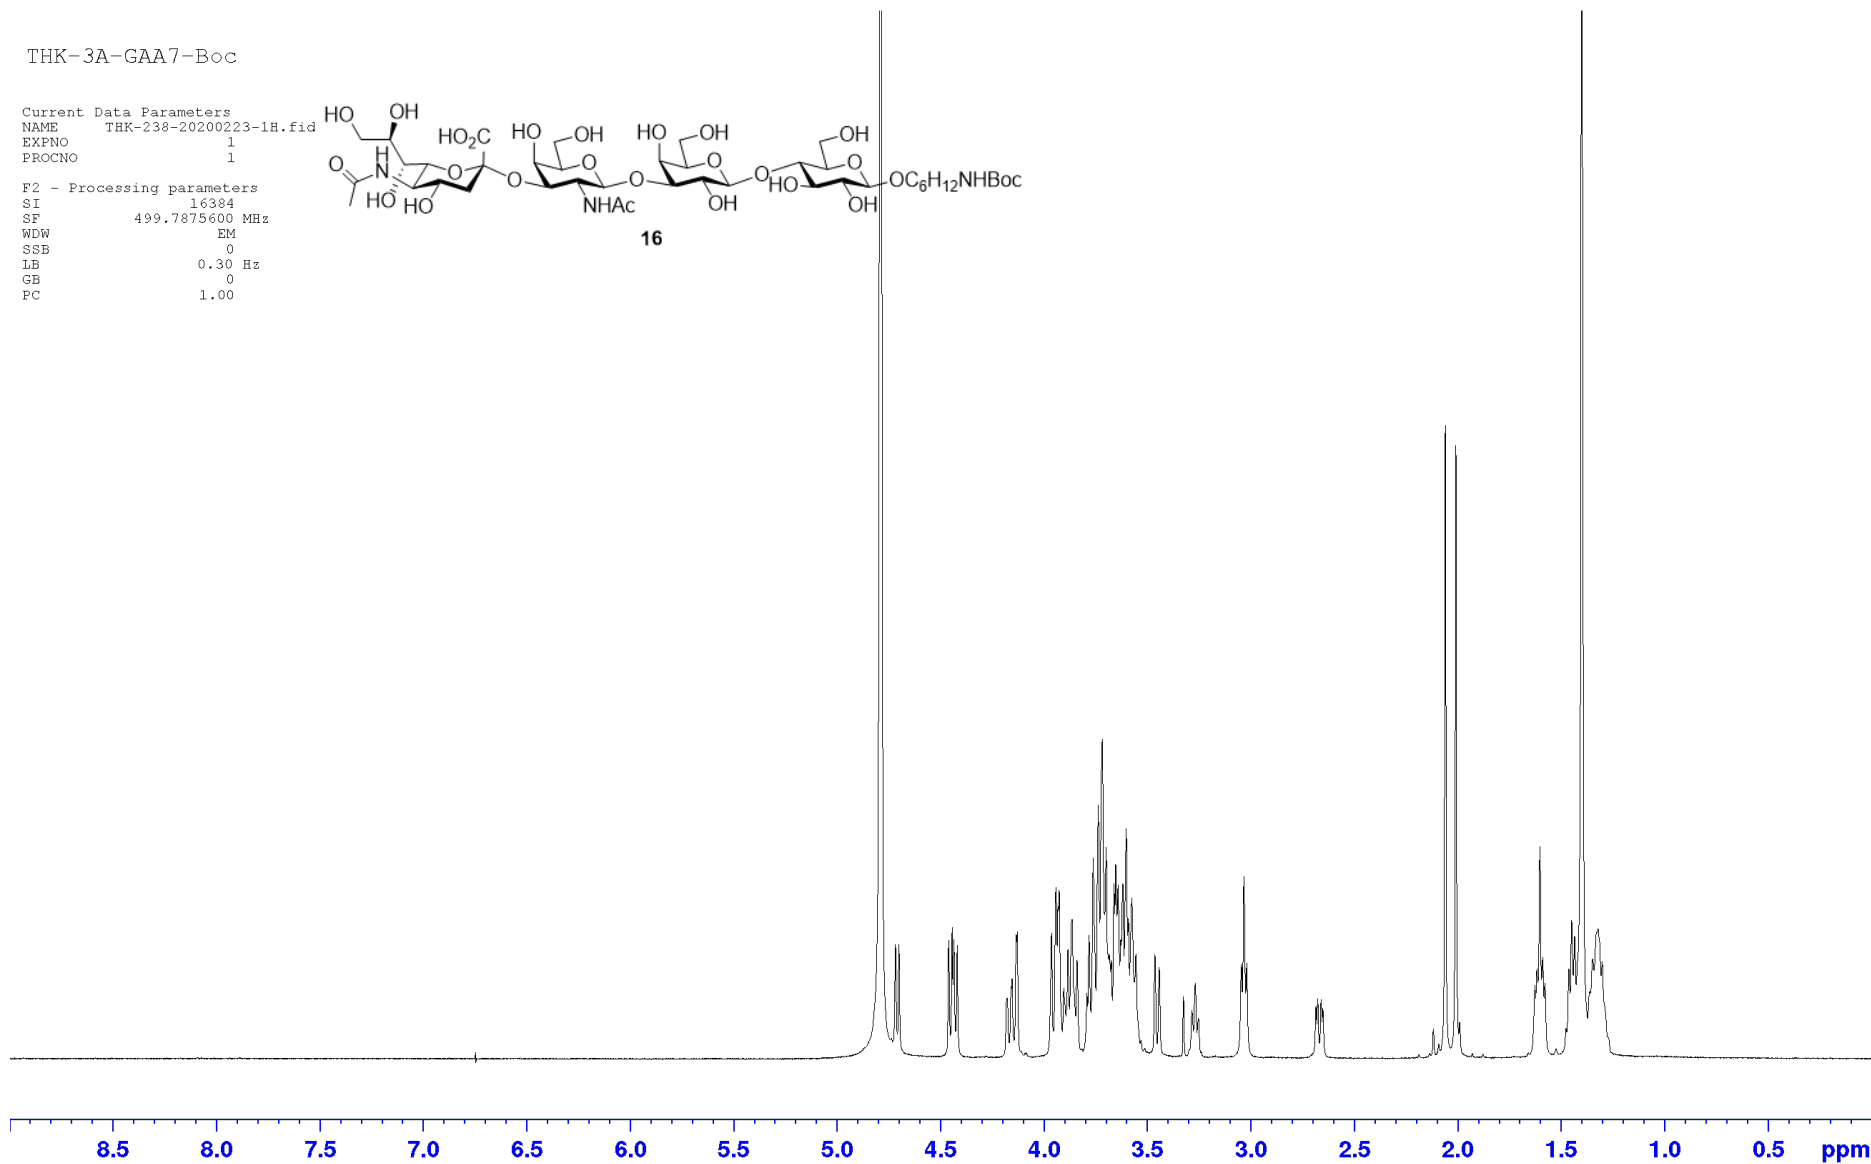

<sup>1</sup>H NMR spectrum of Compound 16 (500 MHz D<sub>2</sub>O)

THK-3A-GAA7-Boc

Current Data Parameters  
NAME THK-238-20200223-13c.fid  
EXPNO 1  
PROCNO 1

F2 - Processing parameters  
SI 65836  
SF 125.6715658 MHz  
WDW EM  
SSB 0  
LB 0.30 Hz  
GB 0  
PC 1.00

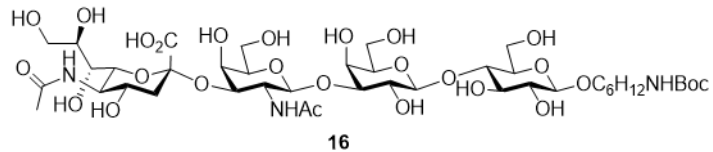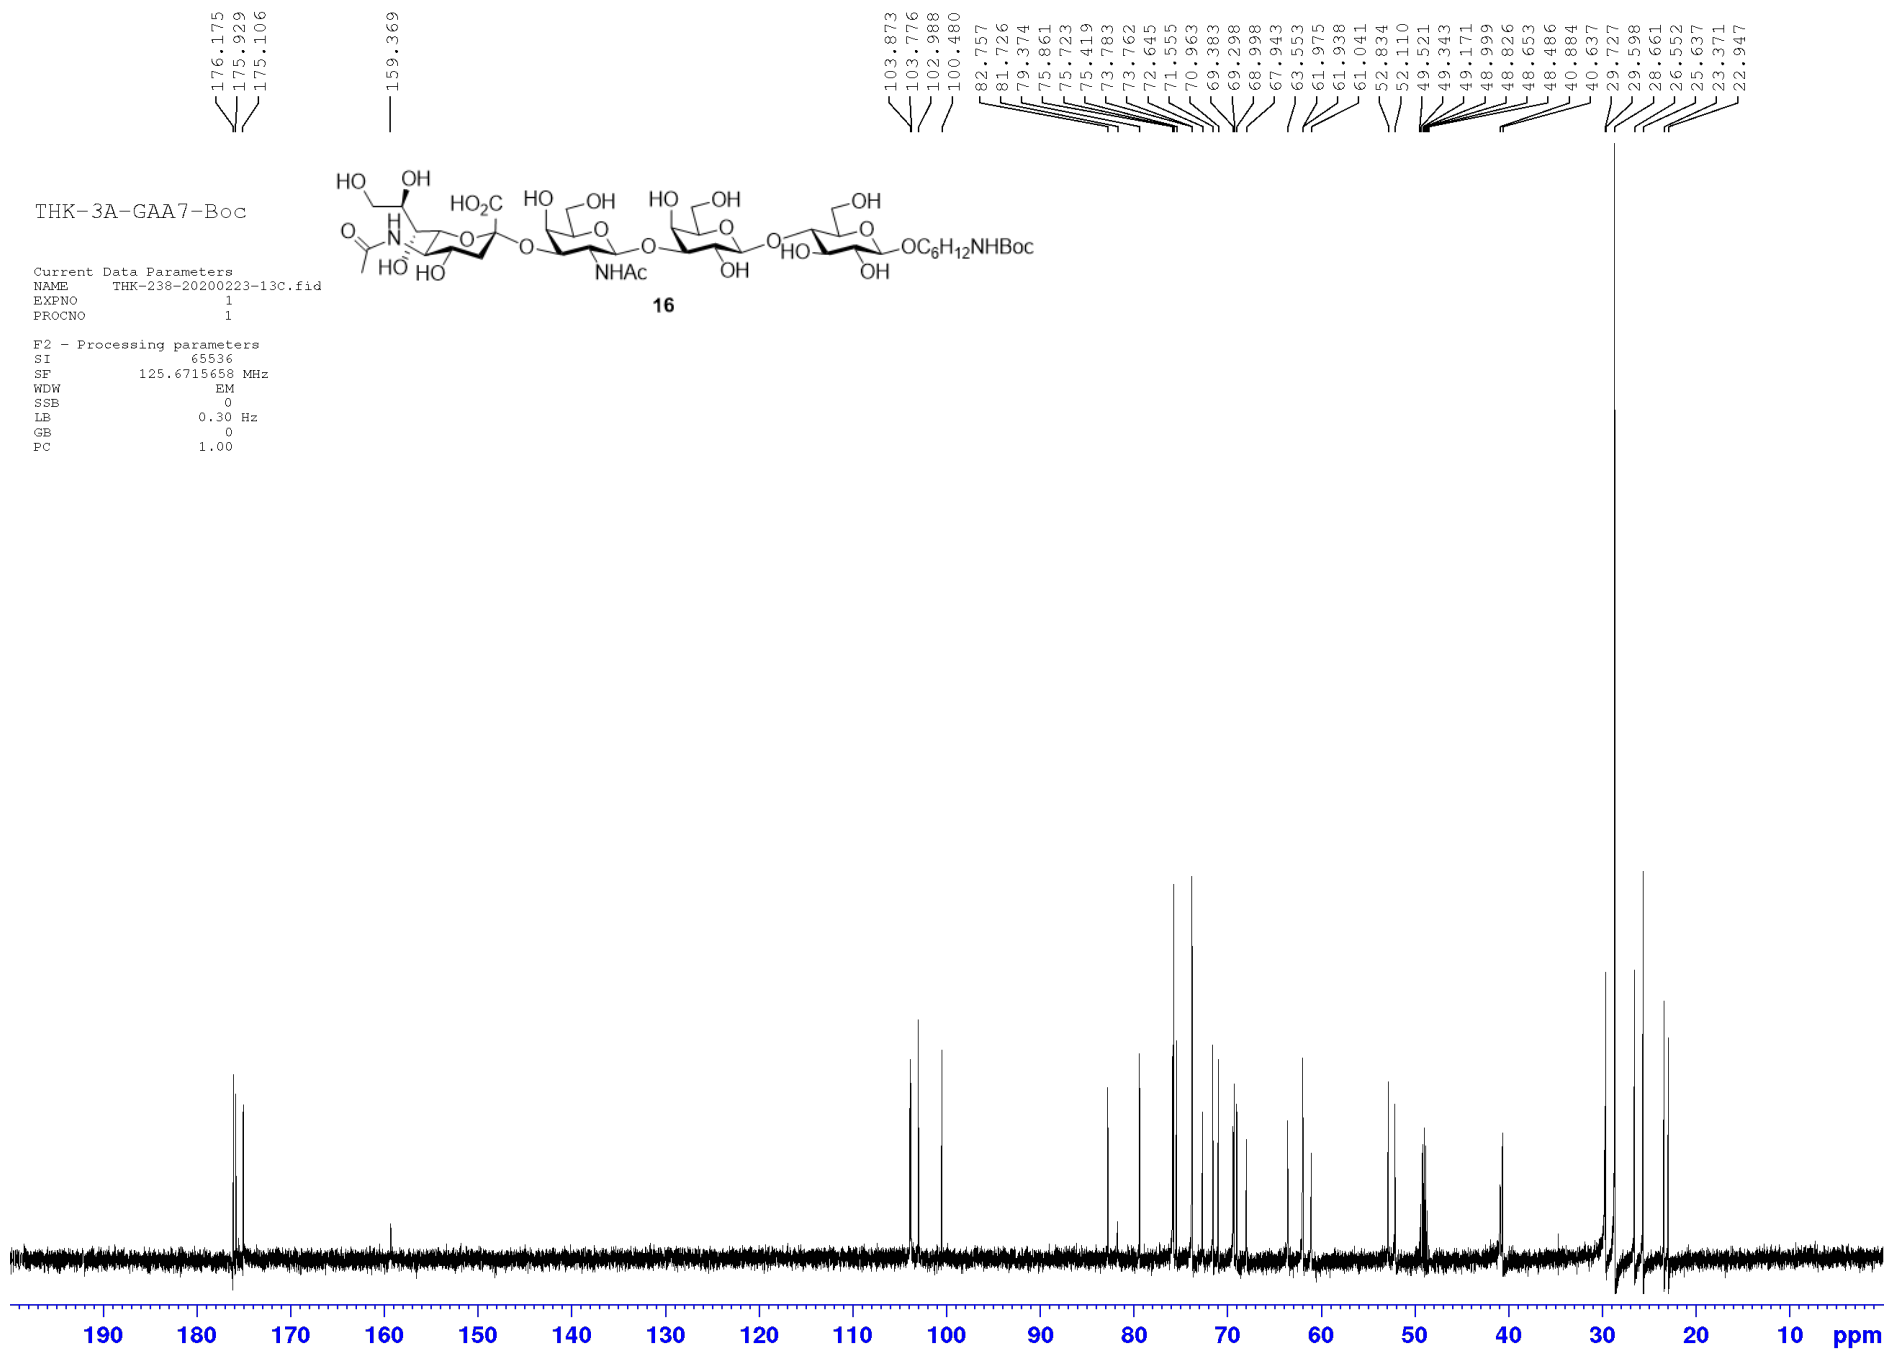

$^{13}\text{C}$  NMR spectrum of Compound 16 (125 MHz  $\text{D}_2\text{O}$ )

THK-3GM-GAA7-NHBoc

Current Data Parameters  
NAME THK-292-20200416.fid  
EXPNO 1  
PROCNO 1

F2 - Processing parameters  
SI 16384  
SF 499.7882087 MHz  
WDW EM  
SSB 0  
LB 0.30 Hz  
GB 0  
PC 1.00

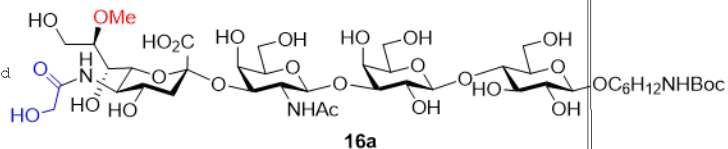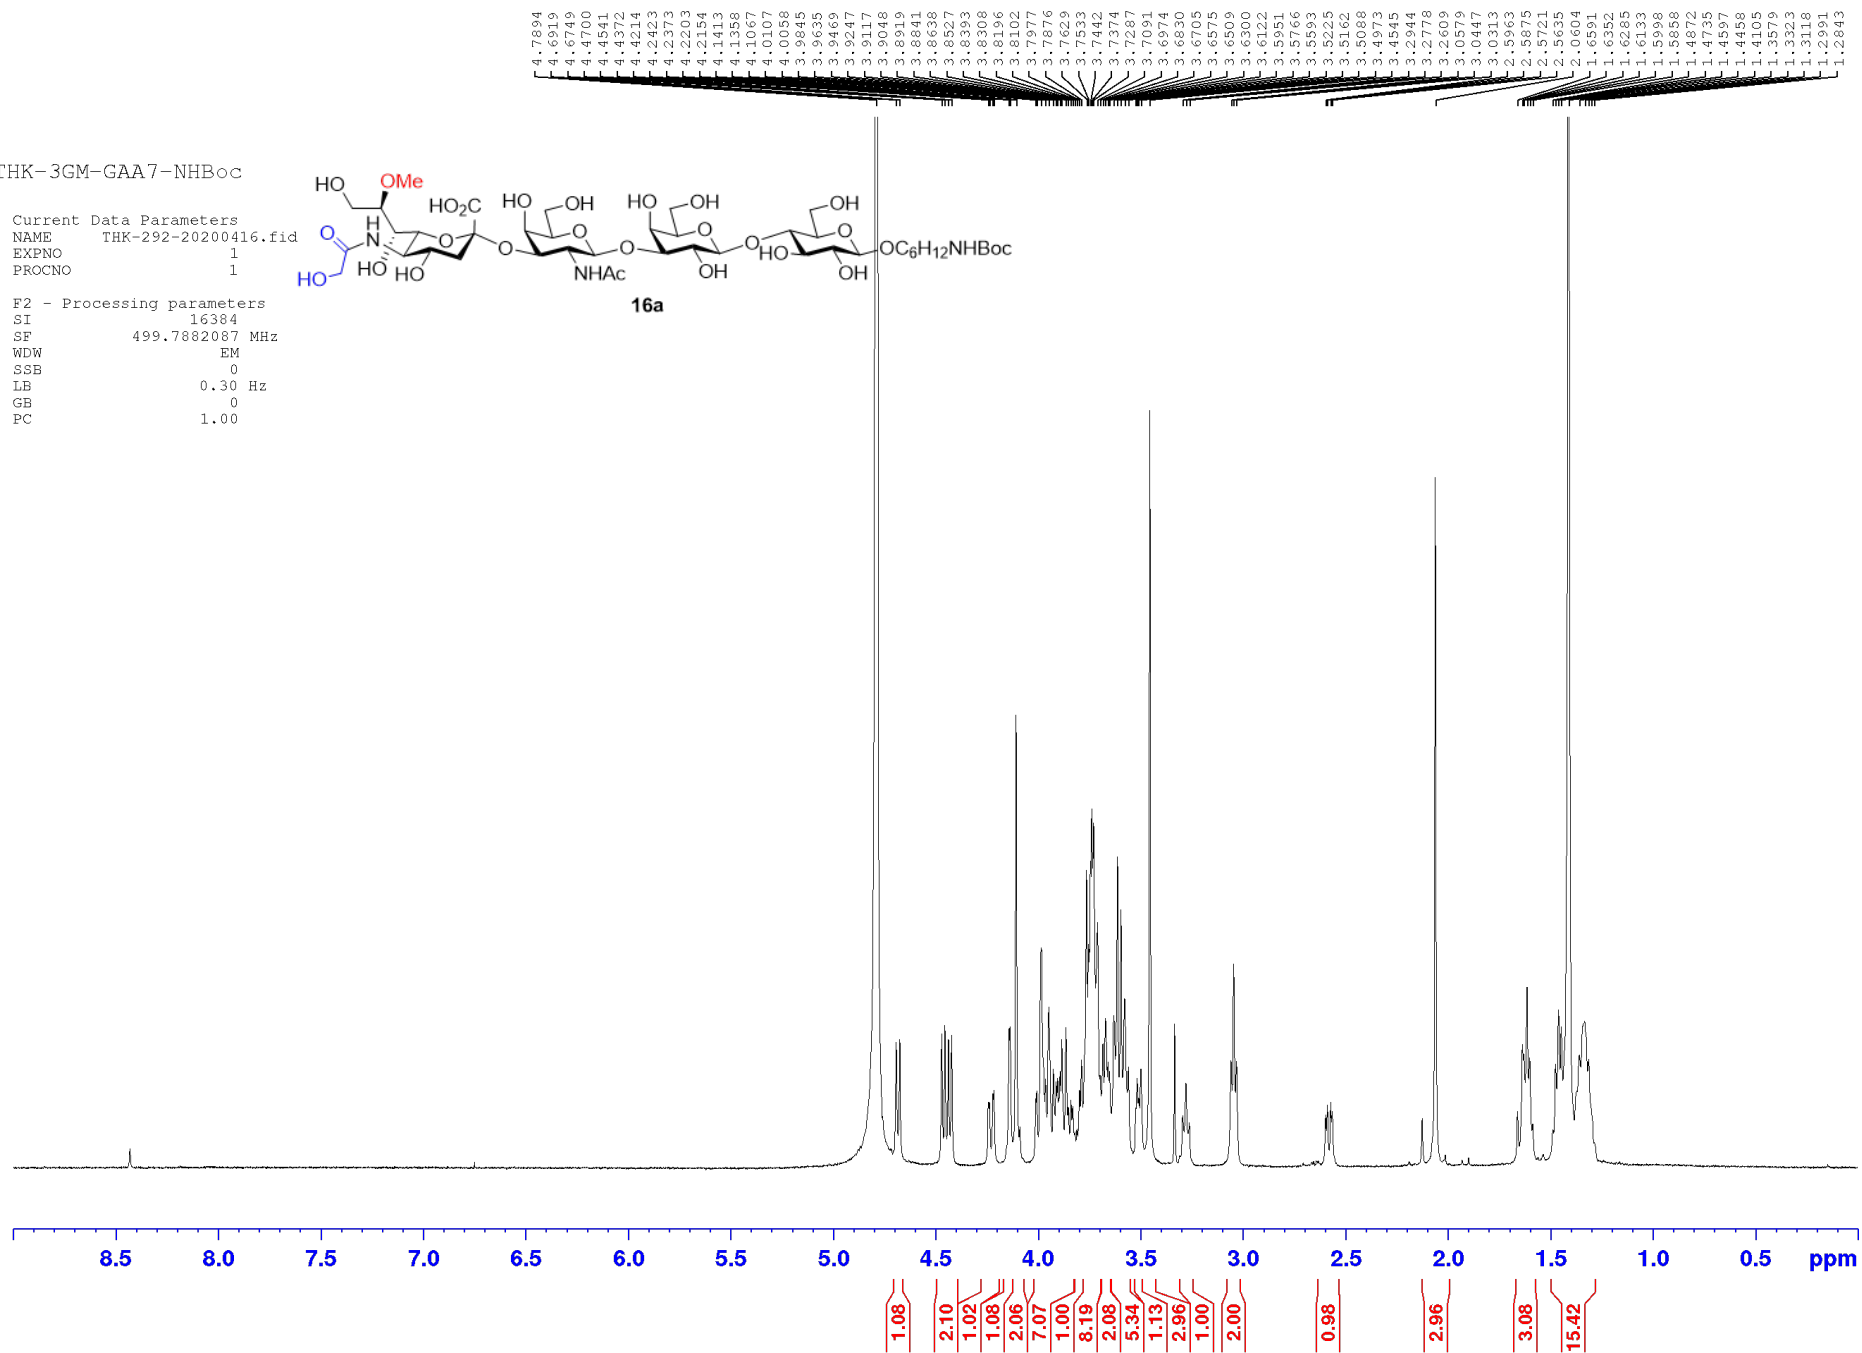

<sup>1</sup>H NMR spectrum of Compound **16a** (500 MHz D<sub>2</sub>O)

THK-3GM-GAA7-Boc

Current Data Parameters  
NAME THK-292-20200417-13c.fid  
EXPNO 1  
PROCNO 1

F2 - Processing parameters  
SI 65536  
SF 125.6717279 MHz  
WDW EM  
SSB 0  
LB 0.30 Hz  
GB 0  
PC 1.00

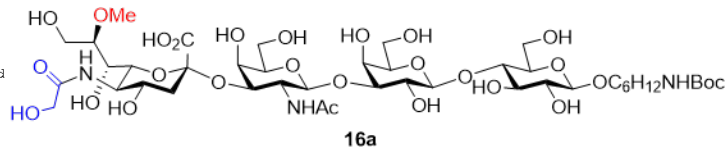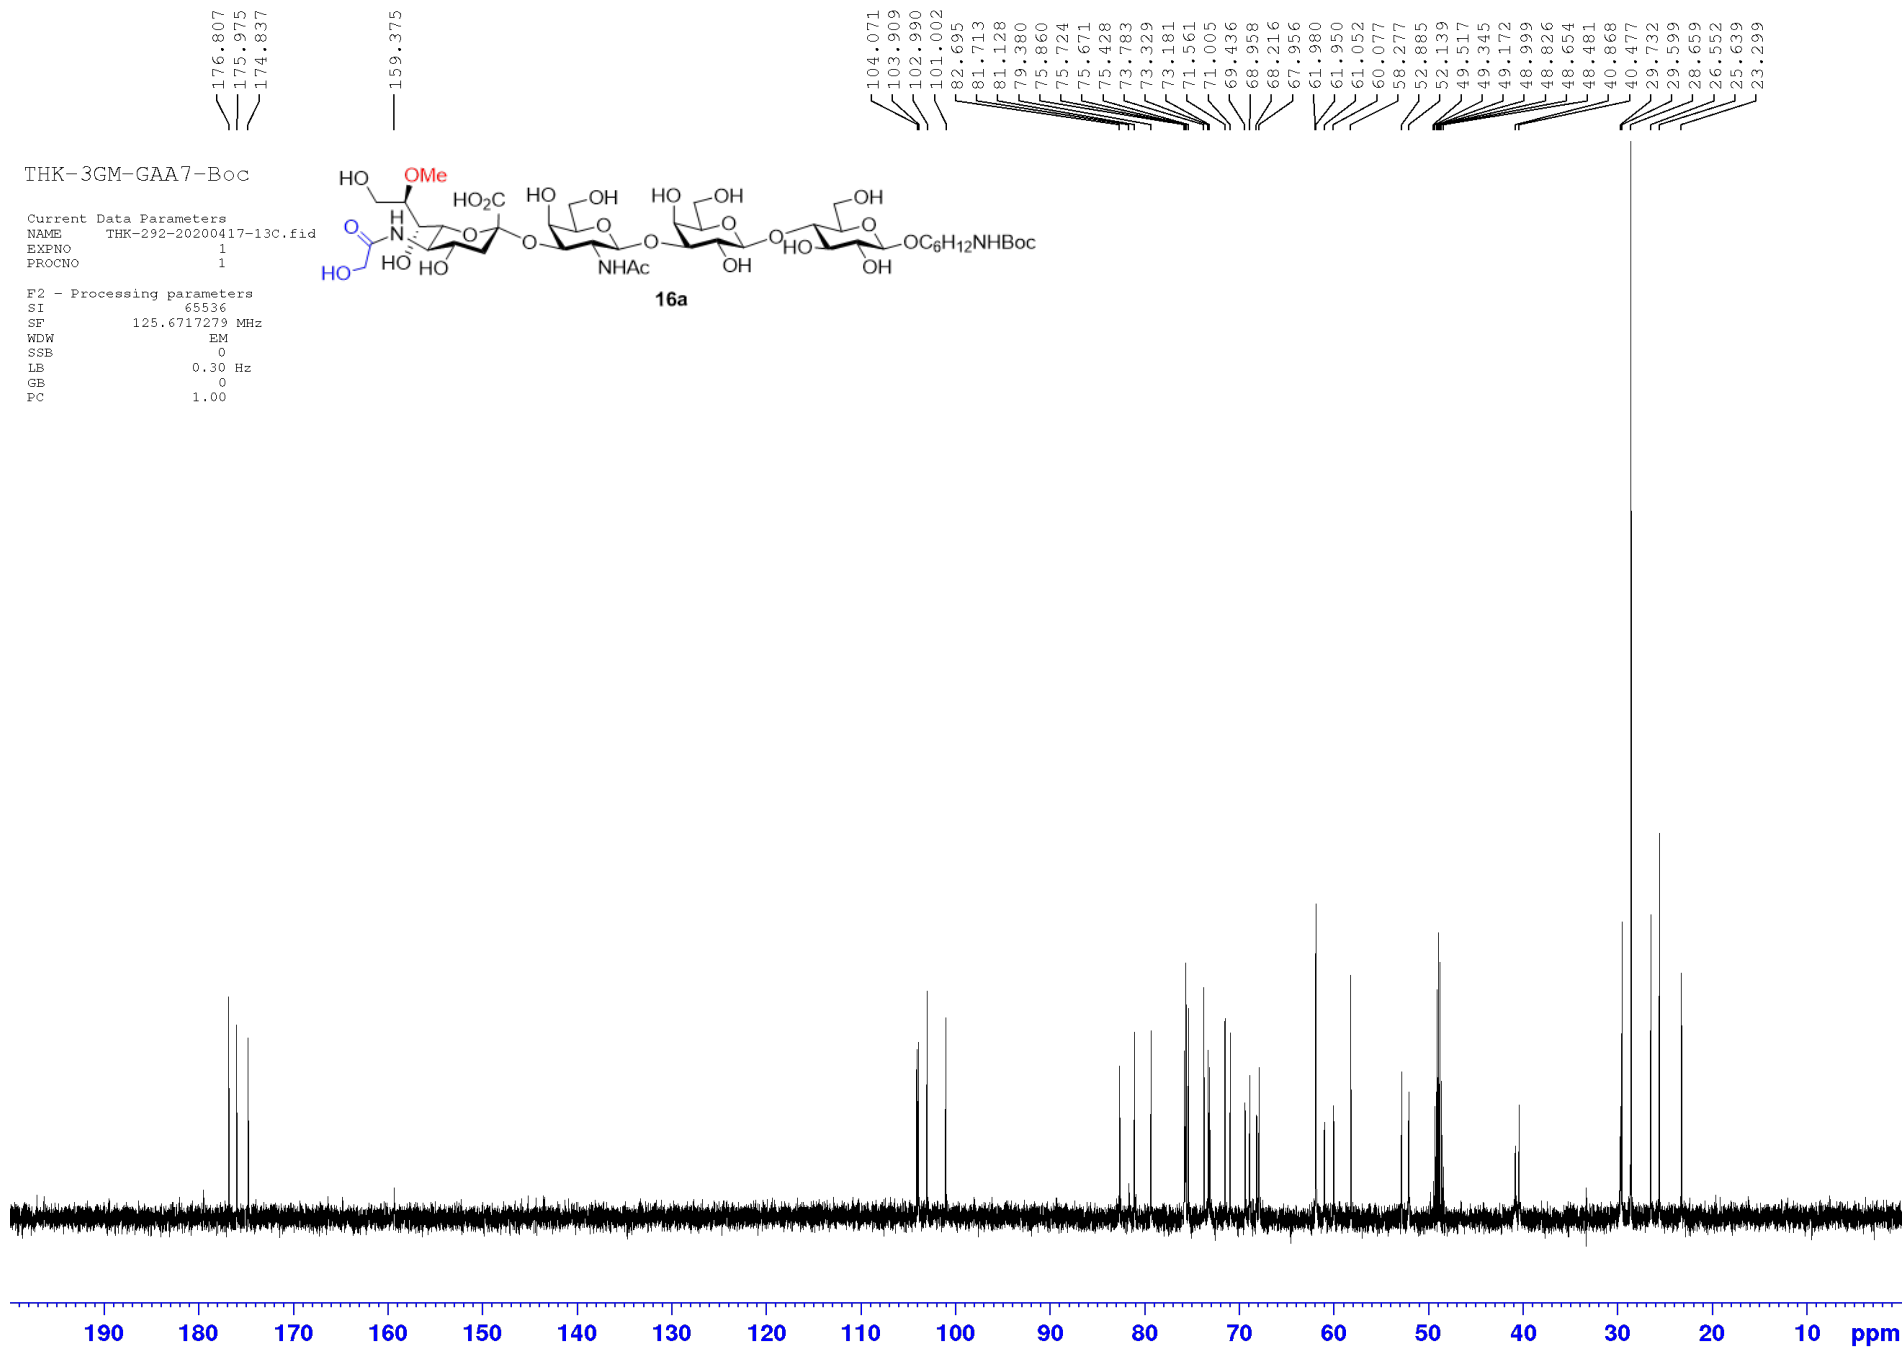

<sup>13</sup>C NMR spectrum of Compound **16a** (125 MHz D<sub>2</sub>O)

THK-6GM3GM-GAA7-NHBoc

Current Data Parameters  
NAME THK-294+160-20200424-18.fid  
EXPNO 1  
PROCNO 1

F2 - Processing parameters  
SI 16384  
SF 499.7875566 MHz  
WDW EM  
SSB 0  
DS 0.30 Hz  
GB 0  
PC 1.00

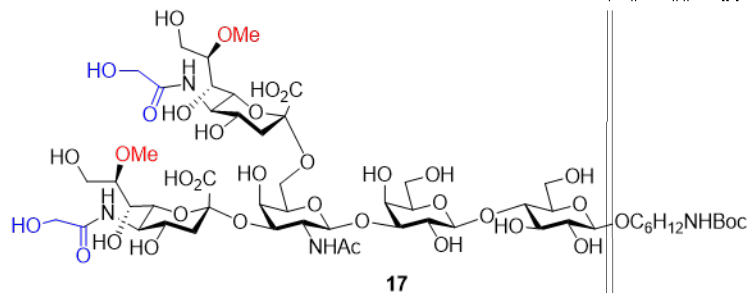

4.7895  
4.6804  
4.6634  
4.4813  
4.4602  
4.4269  
4.4259  
4.2454  
4.2409  
4.2240  
4.2191  
4.1776  
4.1723  
4.1125  
4.1079  
4.0754  
4.0127  
4.0004  
3.9833  
3.9656  
3.9531  
3.9451  
3.9296  
3.9231  
3.9021  
3.8898  
3.8695  
3.8591  
3.8454  
3.8350  
3.8262  
3.8166  
3.7990  
3.7910  
3.7869  
3.7695  
3.7628  
3.7493  
3.7475  
3.7282  
3.7262  
3.7087  
3.7038  
3.6951  
3.6788  
3.6702  
3.6644  
3.6585  
3.6487  
3.6391  
3.6290  
3.6203  
3.6132  
3.5972  
3.5885  
3.5857  
3.5687  
3.5490  
3.5376  
3.5239  
3.5147  
3.5041  
3.4988  
3.4885  
3.4616  
3.3236  
3.3065  
3.2680  
3.2534  
3.0399  
2.6223  
2.6135  
2.5976  
2.5911  
2.5759  
2.5659  
2.0826  
1.7155  
1.6912  
1.6665  
1.6536  
1.6394  
1.6245  
1.6120  
1.5947  
1.4830  
1.4691  
1.4557  
1.4417  
1.4189  
1.3836  
1.3673  
1.3421

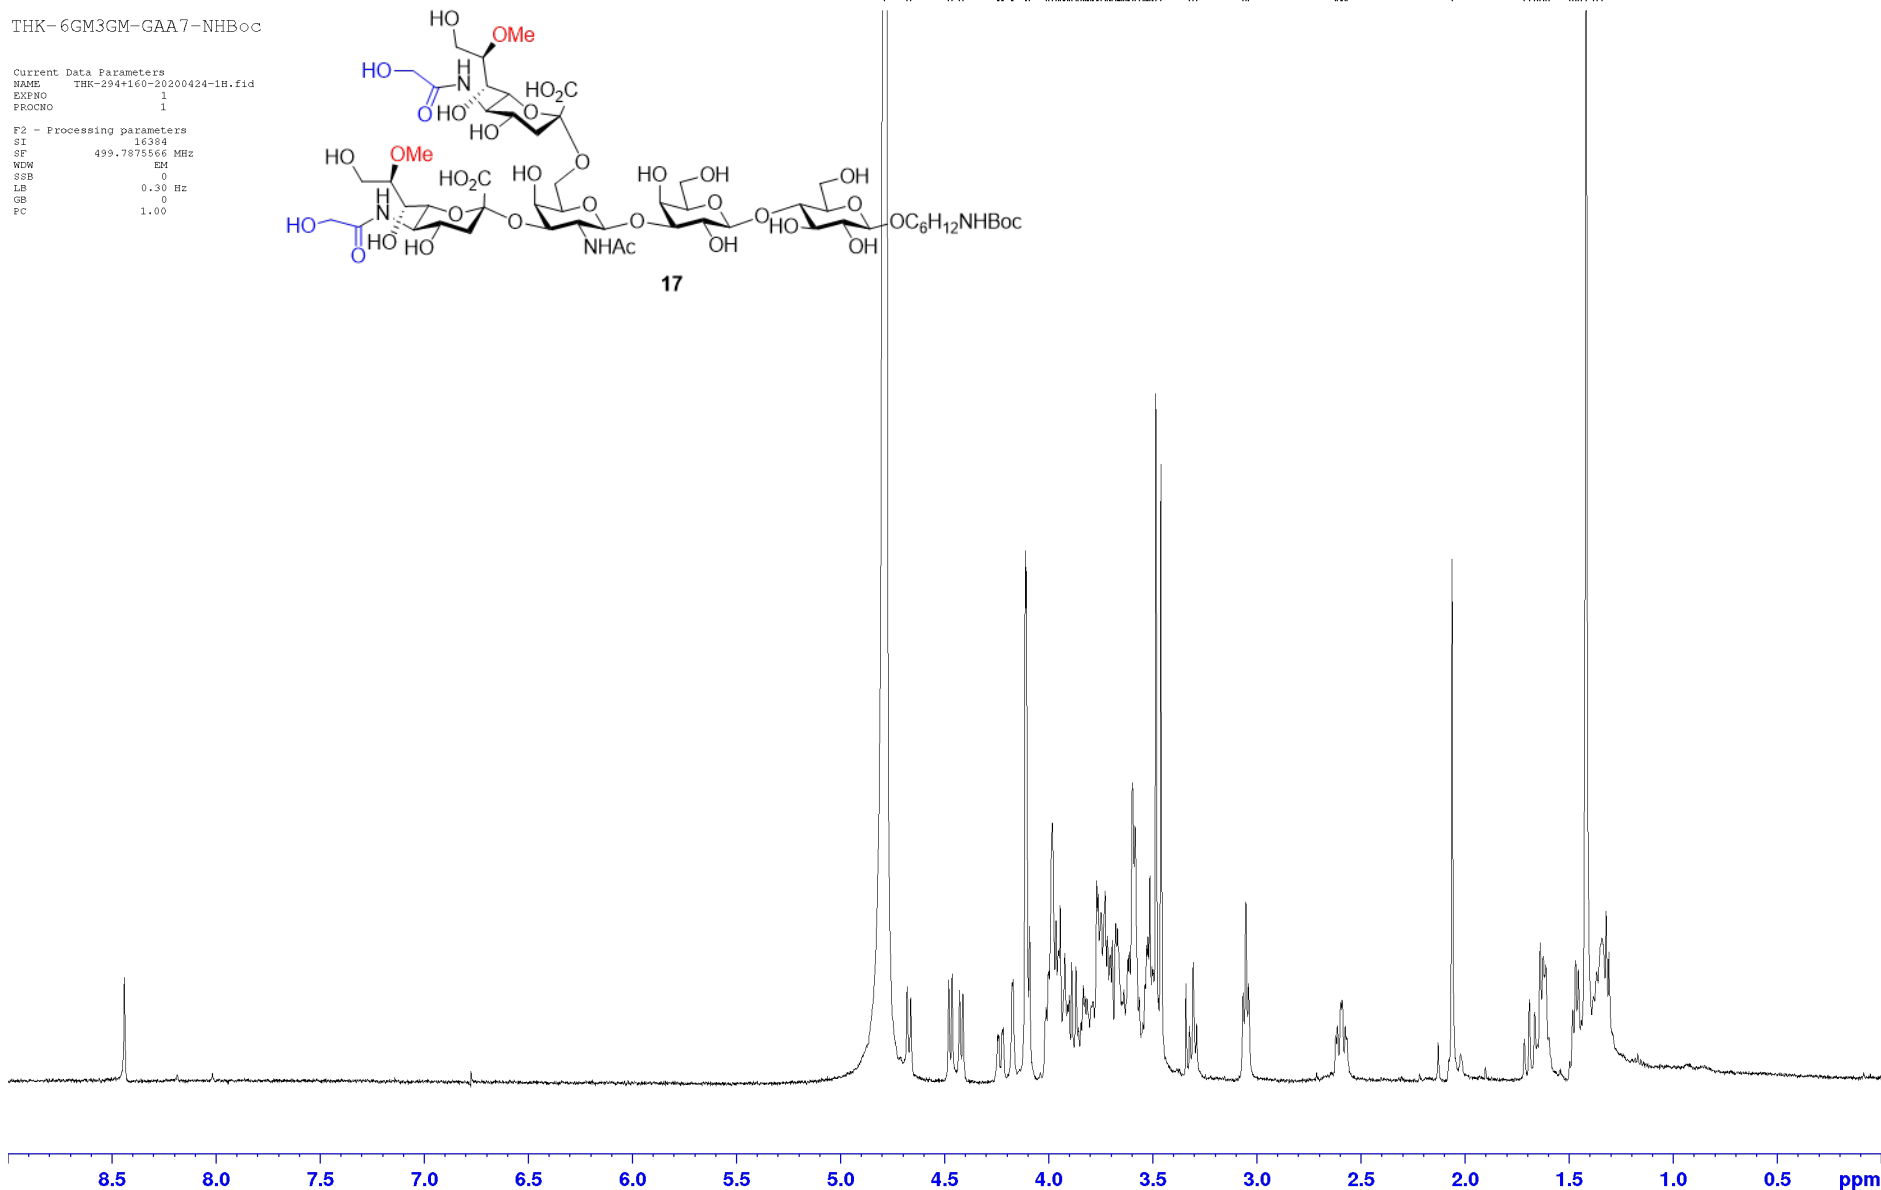

1.00  
1.05  
1.00  
1.02  
1.07  
5.03  
6.24  
2.27  
2.20  
6.06  
2.96  
6.25  
3.04  
6.20  
1.21  
2.05  
2.02  
3.14  
3.98  
15.32

<sup>1</sup>H NMR spectrum of Compound 17 (500 MHz D<sub>2</sub>O)



THK-6GM3GM-GAA7NHBoc

Current Data Parameters  
 NAME THK-294+160-20200425-13C-2.f1d  
 EXPNO 1  
 PROCNO 1

F2 - Processing parameters  
 SI 65536  
 SF 125.6715664 MHz  
 WDW EM  
 SSB 0  
 LB 2.00 Hz  
 GB 0  
 PC 1.00

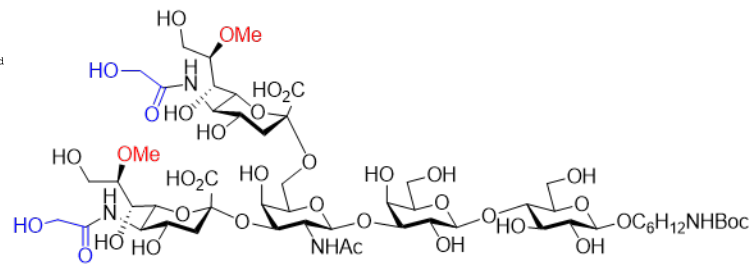

17

176.794  
 176.640  
 175.937  
 174.837  
 174.652  
 159.407  
 104.208  
 104.149  
 102.865  
 101.542  
 101.006  
 82.928  
 81.748  
 81.338  
 81.073  
 80.745  
 75.737  
 75.674  
 75.585  
 74.357  
 73.704  
 73.385  
 73.242  
 73.161  
 71.518  
 70.707  
 69.311  
 68.984  
 68.712  
 68.379  
 68.233  
 67.970  
 64.501  
 61.957  
 61.235  
 60.652  
 60.038  
 58.655  
 58.265  
 52.870  
 52.764  
 52.134  
 49.517  
 49.340  
 49.168  
 48.998  
 48.823  
 48.651  
 48.478  
 41.228  
 40.871  
 40.472  
 29.712  
 29.587  
 28.652  
 26.551  
 25.642  
 23.297

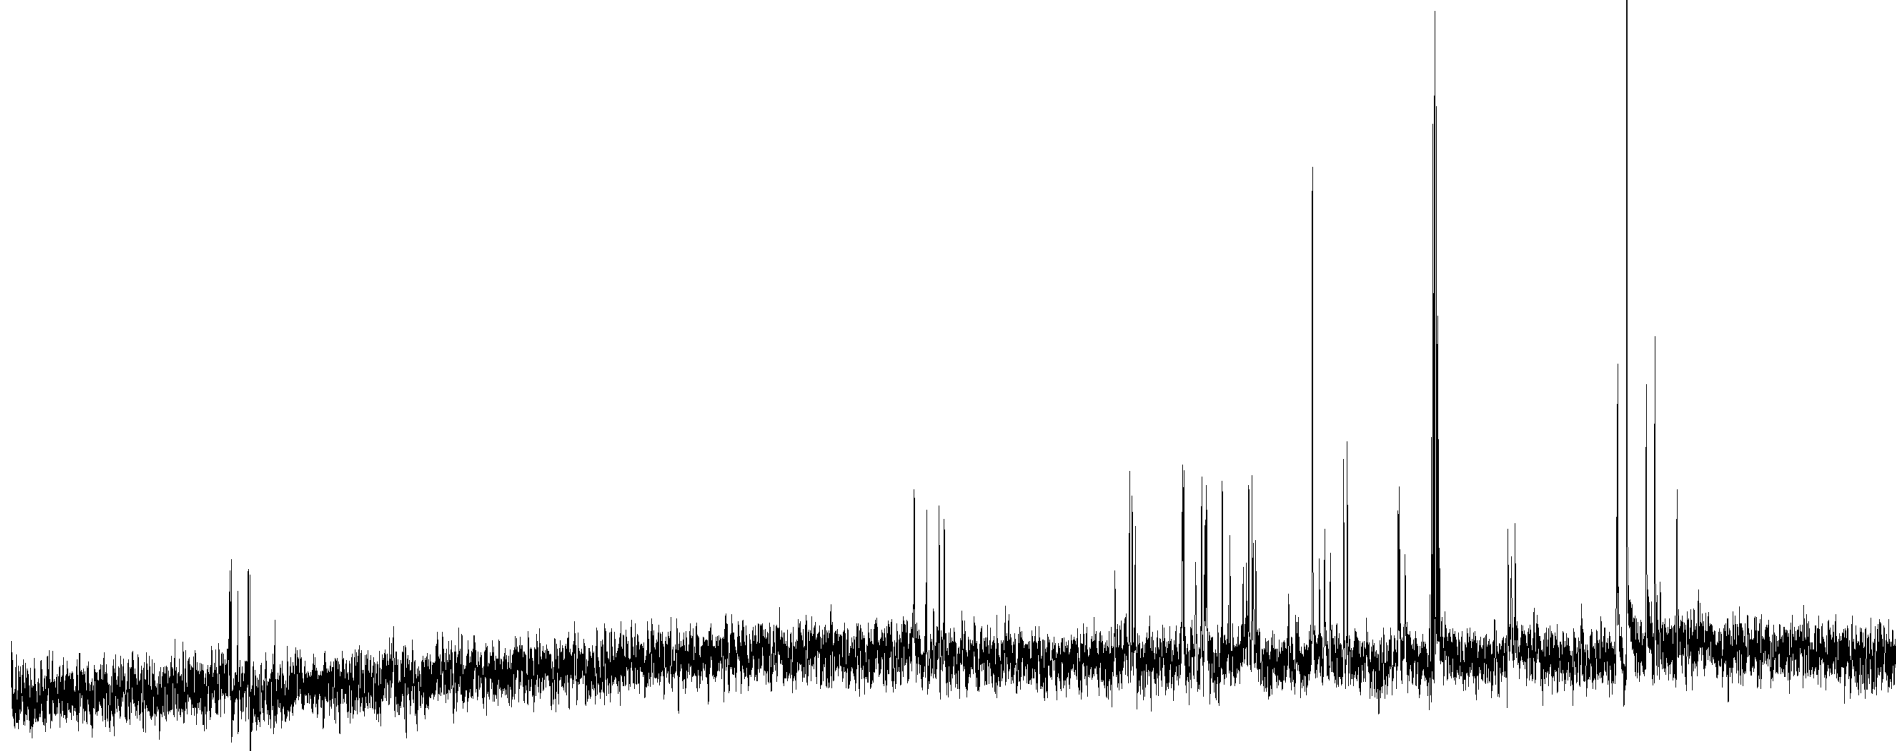

190 180 170 160 150 140 130 120 110 100 90 80 70 60 50 40 30 20 10 ppm

<sup>13</sup>C NMR spectrum of Compound 17 (125 MHz D<sub>2</sub>O)
